# Supplementary material
Source: PubMed Central journal article supplement (PMC10723655)

# Electrochemical Gold Redox Catalysis for Selective Oxidative Arylation

Shuyao Zhang,<sup>a</sup> Xiaohan Ye<sup>a</sup>, Lukasz Wojtas<sup>a</sup>, Wenyan Hao<sup>b</sup>, and Xiaodong Shi<sup>a,\*</sup>

<sup>a</sup>*Department of Chemistry, University of South Florida, Tampa, FL 33620, USA*

<sup>b</sup>*College of Chemistry & Chemical Engineering, Jiangxi Normal University, Nanchang 330022, People's Republic of China*

## Table of Contents

|                                                     |     |
|-----------------------------------------------------|-----|
| I. General Methods and Materials                    | S2  |
| II. General Procedures                              | S3  |
| III. Condition Optimization and Mechanistic Studies | S6  |
| IV. ORTEP Drawing of Crystal Structures             | S12 |
| V. Compound Characterization                        | S19 |
| VI. NMR Spectra Data                                | S35 |

## I. General Methods and Materials

All of the reactions dealing with air and/or moisture-sensitive compounds were carried out under an atmosphere of argon using oven/flame-dried glassware and standard syringe/septa techniques. Unless otherwise noted, all commercial reagents and solvents were obtained from the commercial provider and used without further purification.  $^1\text{H}$  NMR and  $^{13}\text{C}$  NMR spectra were recorded on Agilent 400/600 MHz spectrometers spectrometers. Chemical shifts were reported relative to internal tetramethylsilane ( $\delta$  0.00 ppm) or  $\text{CDCl}_3$  ( $\delta$  7.26 ppm) for  $^1\text{H}$  and  $\text{CDCl}_3$  ( $\delta$  77.00 ppm) for  $^{13}\text{C}$ . Flash column chromatography was performed on 230-430 mesh silica gel. Analytical thin layer chromatography was performed with precoated glass baked plates (250 $\mu$ ) and visualized by fluorescence and by charring after treatment with potassium permanganate stain.

## II. General Procedures

### 2.0 General procedure for the ElectraSyn Set-up

#### Handmade cell connection with IKA ElectraSyn

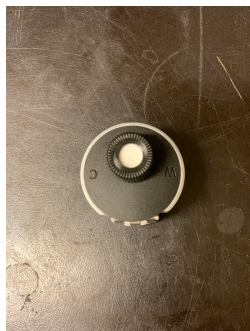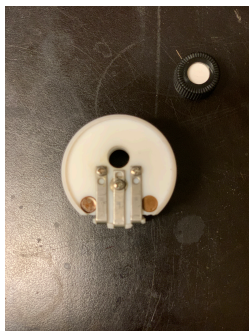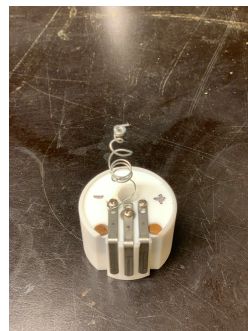

1. Remove the top cover

2. Wind a thin wire and attach to the screw on cathode(-)

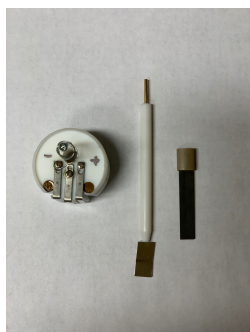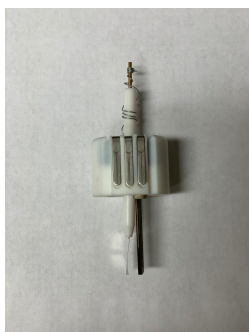

3. Assemble both graphite electrode and Pt electrode.

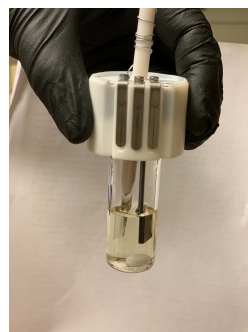

4. Complete the vial set up

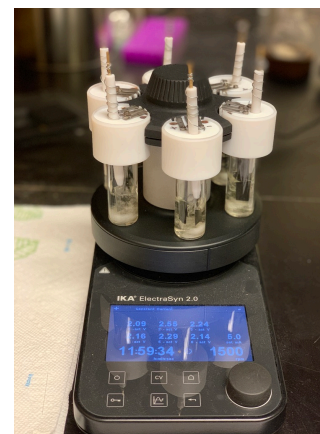

5. Connection the vials to IKA Carousel

## 2.1 General procedure for EAO promoted diaryl oxidative coupling reaction

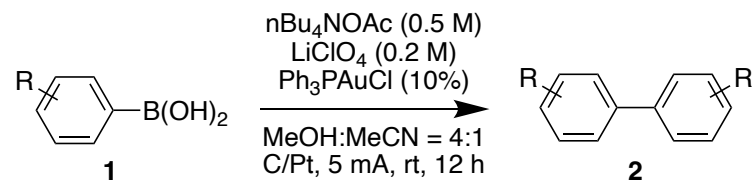

To a 10 mL ElectraSyn screwed vial with 0.5 M  $n\text{Bu}_4\text{NOAc}$  (2.5 mmol, purchased from TCI, catalog# T2694) and 0.2 M  $\text{LiClO}_4$  (1 mmol) in  $\text{MeOH}:\text{MeCN} = 4:1$  (5mL), aryl-boronic acid **1** (0.5 mmol, 1.0 equiv.),  $\text{Ph}_3\text{PAuCl}$  (0.025mmol, 5 mol%) was added. The vial was placed on IKA Carousel and run under constant current at 5 mA for 12 h. After the reaction was completed, the solvent was removed under reduced pressure and the residue was purified by flash chromatography on silica gel to give desired product **2**.

## 2.2 General procedure for EAO promoted terminal alkyne arylation reaction

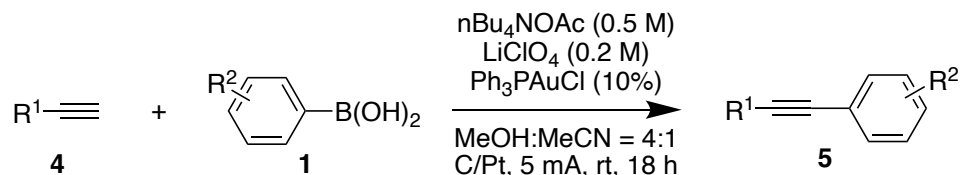

To a 10 mL ElectraSyn screwed vial with 0.5 M  $n\text{Bu}_4\text{NOAc}$  (2.5 mmol, purchased from TCI, catalog# T2694) and 0.2 M  $\text{LiClO}_4$  (1 mmol) in  $\text{MeOH}:\text{MeCN} = 4:1$  (5mL), aryl-boronic acid **1** (0.5 mmol, 2.0 equiv.), terminal alkyne **4** (0.25 mmol, 1.0 equiv.),  $\text{Ph}_3\text{PAuCl}$  (0.025mmol, 10 mol%) was added. The vial was placed on IKA Carousel and run under constant current at 5 mA for 18 h. After the reaction was completed, the solvent was removed under reduced pressure and the residue was purified by flash chromatography on silica gel to give desired product **5**.

## 2.3 General procedure for EAO promoted aryl boronic acid macrocyclization reaction

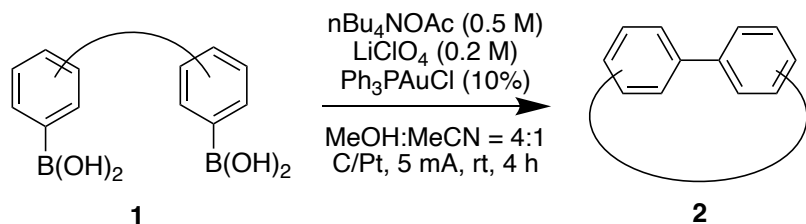

To a 10 mL ElectraSyn screwed vial with 0.5 M  $n\text{Bu}_4\text{NOAc}$  (2.5 mmol, purchased from TCI, catalog# T2694) and 0.2 M  $\text{LiClO}_4$  (1



mmol) in MeOH:MeCN = 4:1 (5mL), aryl-boronic acid **1** (0.05 mmol, 1.0 equiv.), Ph<sub>3</sub>PAuCl (0.005mmol, 10 mol%) was added. The vial was placed on IKA Carousel and run under constant current at 5 mA for 4 h. After the reaction was completed, the solvent was removed under reduced pressure and the residue was purified by flash chromatography on silica gel to give desired product **2**.

### III. Condition Optimization and Mechanistic Studies

#### 3.1 Optimization studies of aryl homo-coupling reaction

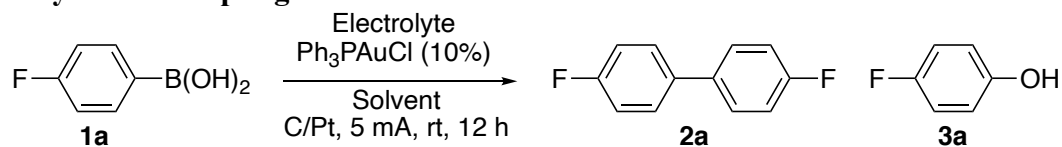

| Entry    | Electrolyte                   |                    | Solvent     |             | Yield      |               | Note  |
|----------|-------------------------------|--------------------|-------------|-------------|------------|---------------|-------|
|          | nBu <sub>4</sub> NOAc         | LiClO <sub>4</sub> | MeOH        | MeCN        | <b>2a</b>  | <b>3a</b>     |       |
| 1        | 0.5 M                         | -                  | 4 mL        | 1 mL        | 23%        | 10%           | -     |
| 2        | 0.2 M                         | 0.2 M              | 4 mL        | 1 mL        | 36%        | 16%           | -     |
| <b>3</b> | <b>0.5 M</b>                  | <b>0.2 M</b>       | <b>4 mL</b> | <b>1 mL</b> | <b>78%</b> | <b>&lt;5%</b> | -     |
| 4        | 0.2 M                         | 0.5 M              | 4 mL        | 1 mL        | 14%        | 35%           | -     |
| 5        | 0.5 M                         | 0.2 M              | 5 mL        | 0 mL        | 15%        | 10%           | -     |
| 6        | 0.5 M                         | 0.2 M              | 3 mL        | 2 mL        | 49%        | 7%            | -     |
| 7        | 0.5 M                         | 0.2 M              | 2.5 mL      | 2.5 mL      | 51%        | <5%           | -     |
| 8        | 0.5 M                         | 0.2 M              | 2 mL        | 3 mL        | 42%        | <5%           | -     |
| 9        | 0.5 M                         | 0.2 M              | 1 mL        | 4 mL        | 23%        | 8%            | -     |
| 10       | 0.5 M LiOAc.2H <sub>2</sub> O |                    | 4 mL        | 1 mL        | 36%        | <5%           | -     |
| 11       | 0.5 M                         | 0.2 M              | 4 mL        | 1 mL        | trace      | 0%            | Argon |
| 12       | 0.75 M                        | 0.2 M              | 4 mL        | 1 mL        | 36%        | 15%           | -     |
| 13       | 0.5 M                         | 0.02 M             | 4 mL        | 1 mL        | 8%         | <5%           | -     |
| 14       | 0.5 M                         | 0.05 M             | 4 mL        | 1 mL        | 14%        | <5%           | -     |
| 15       | 0.5 M                         | 0.1 M              | 4 mL        | 1 mL        | 41%        | 10%           | -     |
| 16       | 0.5 M                         | 0.15 M             | 4 mL        | 1 mL        | 74%        | <5%           | -     |
| 17       | 0.5 M                         | 0.2 M              | 4 mL        | 1 mL        | 75%        | <5%           | -     |

|    |       |        |      |      |     |     |                      |
|----|-------|--------|------|------|-----|-----|----------------------|
| 18 | 0.5 M | 0.25 M | 4 mL | 1 mL | 72% | <5% | -                    |
| 19 | 0.5 M | 0.3 M  | 4 mL | 1 mL | 30% | <5% | -                    |
| 20 | 0.5 M | 0.4 M  | 4 mL | 1 mL | 10% | <5% | -                    |
| 21 | 0.5 M | 0.5 M  | 4 mL | 1 mL | <5% | <5% | -                    |
| 23 | 0.5 M | 0.2 M  | 4 mL | 1 mL | 38% | <5% | Water-free           |
| 24 | 0.5 M | 0.2 M  | 4 mL | 1 mL | 72% | <5% | Add 1 eq water       |
| 25 | 0.5 M | 0.2 M  | 4 mL | 1 mL | 70% | <5% | Add 2 eq water       |
| 26 | 0.5 M | 0.2 M  | 4 mL | 1 mL | 72% | <5% | Add 3 eq water       |
| 27 | 0.5 M | 0.2 M  | 4 mL | 1 mL | 74% | <5% | Add 5 eq water       |
| 28 | 0.5 M | 0.2 M  | 4 mL | 1 mL | 75% | <5% | Add 10 eq water      |
| 29 | 0.5 M | 0.2 M  | 4 mL | 1 mL | 40% | <5% | 25%<br>concentration |
| 30 | 0.5 M | 0.2 M  | 4 mL | 1 mL | 0%  | <5% | No [Au]              |

### 3.2 Study of “oxygen effect”

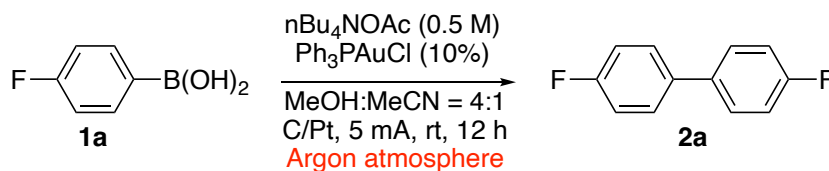

| Entry | Adduct                                                                | Result                          |
|-------|-----------------------------------------------------------------------|---------------------------------|
| 1     | N/A                                                                   | No rxn, fast gold decomposition |
| 2     | 50 $\mu\text{L}$ $\text{H}_2\text{O}$                                 | No rxn, fast gold decomposition |
| 3     | 500 $\mu\text{L}$ $\text{H}_2\text{O}$                                | No rxn, fast gold decomposition |
| 4     | 50 $\mu\text{L}$ $\text{H}_2\text{O}$ + 2 eq $\text{Li}_2\text{CO}_3$ | No rxn, fast gold decomposition |
| 5     | 2 eq $\text{NaOH}$                                                    | No rxn, fast gold decomposition |
| 6     | 2 eq $\text{LiOMe}$                                                   | No rxn, fast gold decomposition |
| 7     | $\text{O}_2$                                                          | 25% yield                       |

We started our investigation on performing our standard reaction in glovebox (Entry 1). We observed that gold will decompose on cathode quickly (usually in 1 h). Then we start to wonder which adduct stopped the gold decomposition. We tried to add water, base and oxygen separately (Entry 2-8). Only entries with oxygen gave us desired product **2a** without gold decomposition. However, it was still not clear that whether oxygen helped with the gold oxidation on anode or simply serve as a sacrificial oxidant (perform reduction on cathode instead of gold), so we designed two more experiment to study on it.

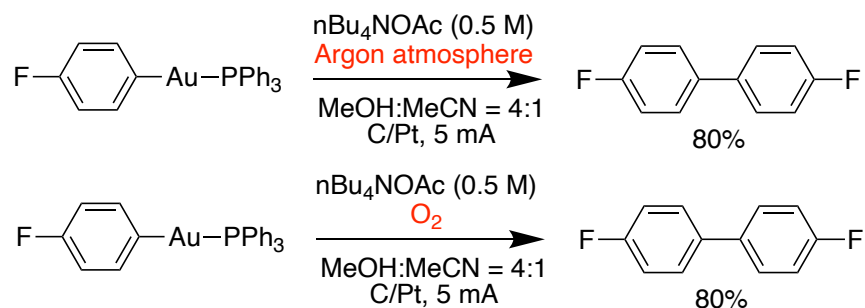

We prepared Ph<sub>3</sub>PAu(p-FPh) as starting material, and charged them into standard reaction condition, one under argon and one under oxygen. If the one with argon did not give desired diaryl product, then oxygen should play an important role in gold oxidation. If both of them reacted well, then oxygen should serve as a sacrificial oxidant. The result showed that both reactions worked well, generated the desired product at 80% yield. This result clearly indicated that oxygen is a sacrificial oxidant, it was reduced on cathode to prevent the gold decomposition.

### 3.3 Optimization studies of terminal alkyne arylation reaction

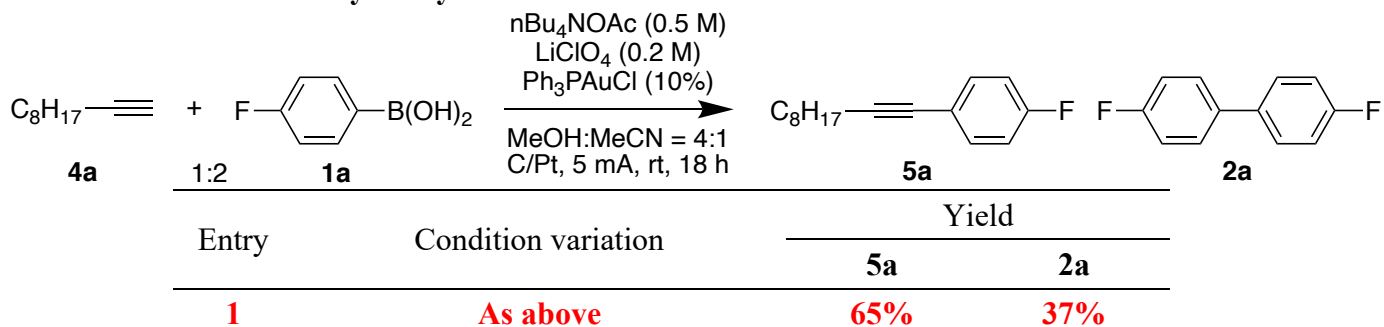

|    |                                        |     |     |
|----|----------------------------------------|-----|-----|
| 2  | 0.1 M LiClO <sub>4</sub>               | 30% | 26% |
| 3  | No LiClO <sub>4</sub>                  | 21% | 30% |
| 4  | 0.3 M LiClO <sub>4</sub>               | 34% | 18% |
| 5  | 5 mL MeOH                              | 32% | 25% |
| 6  | 3 mL MeOH 2 mL MeCN                    | 41% | 46% |
| 7  | 2 mL MeOH 3 mL MeCN                    | <5% | 12% |
| 8  | 5 eq <b>4a</b> , 1 eq <b>1a</b>        | 10% | <5% |
| 9  | 3 eq <b>1a</b> , no LiClO <sub>4</sub> | 18% | 30% |
| 10 | 3 eq <b>1a</b>                         | 40% | 35% |

### 3.4 General procedures and results for mechanistic studies

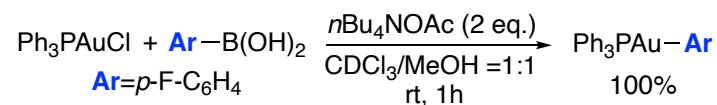

To a 5 mL vial with 0.2 mmol *n*Bu<sub>4</sub>NOAc in 1 ml CDCl<sub>3</sub>/MeOH = 1:1 solvent was added 0.1 mmol Ph<sub>3</sub>PAuCl and 0.1 mmol *p*-FPhB(OH)<sub>2</sub>. The reaction was stirred at room temperature for 1 h, and the resulted solution was directly used to perform <sup>19</sup>F and <sup>31</sup>P NMR study without further operation.

**Result:** The conversion of Ph<sub>3</sub>PAuCl and the yield of Ph<sub>3</sub>PAu-Ar were both 100%.

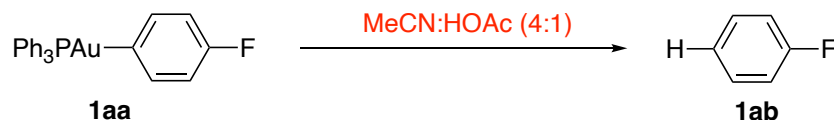

To a 5 mL vial was added 0.1 mmol **1aa**, 0.8 mL MeCN and 0.2 mL HOAc. The reaction was stirred at room temperature for 30 min, then the resulted solution was directly used to perform <sup>19</sup>F and <sup>31</sup>P NMR study with CDCl<sub>3</sub> as deuterium solvent.

**Result:** Purple precipitation started to form within 10 min. **1aa** was completely consumed after 30 min and the yield of **1ab** was 100%

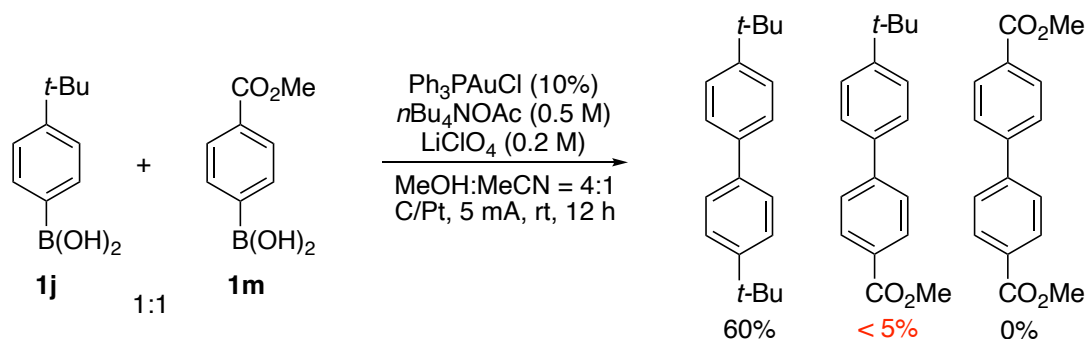

To a 10 mL ElectraSyn screwed vial with 0.5 M *n*Bu<sub>4</sub>NOAc (2.5 mmol, purchased from TCI, catalog# T2694) and 0.2 M LiClO<sub>4</sub> (1 mmol) in MeOH:MeCN = 4:1 (5mL), **1j** (0.25 mmol, 1.0 equiv.), **1m** (0.25 mmol, 1.0 equiv.) and Ph<sub>3</sub>PAuCl (0.025mmol, 10 mol%) was added. The vial was placed on IKA Carousel and run under constant current at 5 mA for 12 h. After the reaction was completed, 0.25 mmol 1,3,5-trimethoxybenzene was added to the solution to perform <sup>1</sup>H NMR study.

**Result:** Homocoupling product **2j** was detected in 60% yield, the cross-coupling product has only trace amount yield.

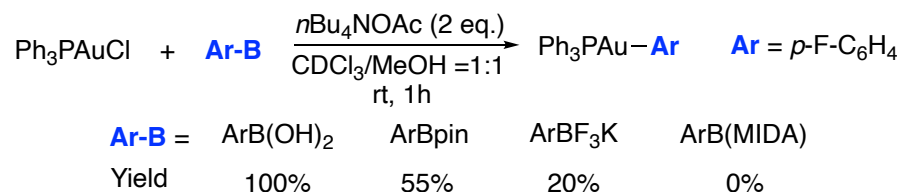

To a 5 mL vial with 0.2 mmol *n*Bu<sub>4</sub>NOAc in 1 ml CDCl<sub>3</sub>/MeOH = 1:1 solvent was added 0.1 mmol Ph<sub>3</sub>PAuCl and 0.1 mmol corresponding boron compounds. The reaction was stirred at room temperature for 1 h, and the resulted solution was directly used to perform <sup>19</sup>F and <sup>31</sup>P NMR study without further operation.

**Result:** as shown above.

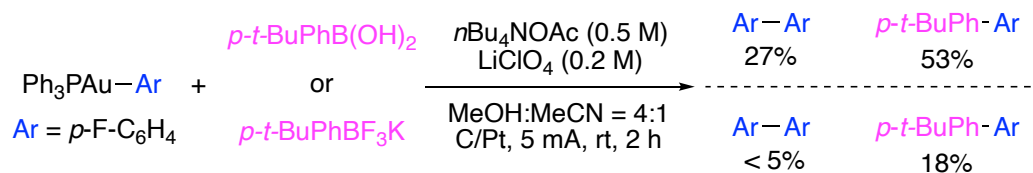

To a 10 mL ElectraSyn screwed vial with 0.5 M *n*Bu<sub>4</sub>NOAc (2.5 mmol, purchased from TCI, catalog# T2694) and 0.2 M LiClO<sub>4</sub> (1 mmol) in MeOH:MeCN = 4:1 (5mL), 0.25 mmol Ph<sub>3</sub>PAuPhF and 0.25 mmol corresponding boron compound was added. The vial was placed on IKA Carousel and run under constant current at 5 mA for 2 h. After the reaction was completed, the solution was directly used

to perform  $^{19}\text{F}$  NMR study with  $\text{CDCl}_3$  as deuterium solution.

**Result:** Reaction of  $p$ - $t\text{BuC}_6\text{H}_4\text{B}(\text{OH})_2$  and  $\text{Ph}_3\text{PAuPhF}$  gave 53% cross coupling product and 27% homocoupling product. Reaction of  $p$ - $t\text{BuC}_6\text{H}_4\text{BF}_3\text{K}$  and  $\text{Ph}_3\text{PAuPhF}$  gave 18% cross coupling product, while no homocoupling product was observed.

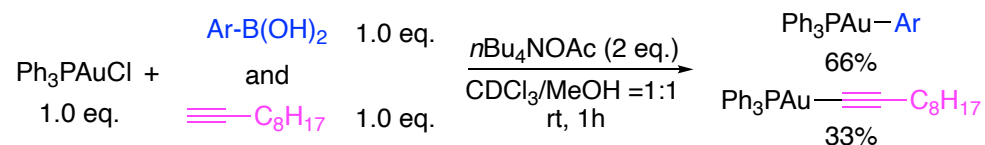

To a 5 mL vial with 0.2 mmol  $n\text{Bu}_4\text{NOAc}$  in 1 ml  $\text{CDCl}_3/\text{MeOH} = 1:1$  solvent was added 0.1 mmol  $\text{Ph}_3\text{PAuCl}$ , 0.1 mmol **1a** and 0.1 mmol **4a**. The reaction was stirred at room temperature for 1 h, and the resulted solution was directly used to perform  $^{19}\text{F}$  and  $^{31}\text{P}$  NMR study without further operation.

**Result:** The conversion of  $\text{Ph}_3\text{PAuCl}$  was 100%. Aryl gold species was generated in 66% yield and the gold acetylene was generated in 33% yield.

## IV. ORTEP Drawing of Crystal Structures

X-ray diffraction data were measured on Bruker D8 Venture PHOTON II CPAD diffractometer equipped with a Cu K $\alpha$  INCOATEC ImuS micro-focus source ( $\lambda = 1.54178 \text{ \AA}$ ). Indexing was performed using *APEX3* [1] (Difference Vectors method). Data integration and reduction were performed using SaintPlus [2]. Absorption correction was performed by multi-scan method implemented in SADABS [3]. Space groups were determined using XPREP implemented in APEX3 [1]. Structure was solved using SHELXT [4] and refined using SHELXL-2018 [5] (full-matrix least-squares on  $F^2$ ) through OLEX2 interface program [6]. Crystal data and refinement conditions are shown in Tables 1 - 4.

[1] Bruker (2019). *APEX3* Bruker AXS Inc., Madison, Wisconsin, USA.

[2] Bruker (2019) SAINT V8.35A. Data Reduction Software.

[3] Sheldrick, G. M. (1996). *SADABS. Program for Empirical Absorption Correction*. University of Gottingen, Germany.

[4] XT, G.M. Sheldrick, Acta Cryst. (2015). A71, 3-8

[5] XL, Sheldrick, G. M. (2008). Acta Cryst. A64, 112-122.

[6] Dolomanov, O.V.; Bourhis, L.J.; Gildea, R.J.; Howard, J.A.K.; Puschmann, H., OLEX2: A complete structure solution, refinement and analysis program (2009). J. Appl. Cryst., 42, 339-341



| <b>Table 1 Crystal data and structure refinement for 2r.</b> |                                                               |
|--------------------------------------------------------------|---------------------------------------------------------------|
| Identification code                                          | 2r                                                            |
| Empirical formula                                            | C <sub>19</sub> H <sub>18</sub> O <sub>4</sub>                |
| Formula weight                                               | 310.33                                                        |
| Temperature/K                                                | 100.0                                                         |
| Crystal system                                               | monoclinic                                                    |
| Space group                                                  | P2 <sub>1</sub> /c                                            |
| a/Å                                                          | 10.6865(4)                                                    |
| b/Å                                                          | 4.4027(2)                                                     |
| c/Å                                                          | 32.2490(10)                                                   |
| α/°                                                          | 90                                                            |
| β/°                                                          | 96.691(2)                                                     |
| γ/°                                                          | 90                                                            |
| Volume/Å <sup>3</sup>                                        | 1506.96(10)                                                   |
| Z                                                            | 4                                                             |
| ρ <sub>calc</sub> /g/cm <sup>3</sup>                         | 1.368                                                         |
| μ/mm <sup>-1</sup>                                           | 0.779                                                         |
| F(000)                                                       | 656.0                                                         |
| Crystal size/mm <sup>3</sup>                                 | 0.2 × 0.05 × 0.04                                             |
| Radiation                                                    | CuKα (λ = 1.54178)                                            |
| 2θ range for data collection/°                               | 5.518 to 157.686                                              |
| Index ranges                                                 | -13 ≤ h ≤ 12, -5 ≤ k ≤ 5, -41 ≤ l ≤ 39                        |
| Reflections collected                                        | 15842                                                         |
| Independent reflections                                      | 3216 [R <sub>int</sub> = 0.0428, R <sub>sigma</sub> = 0.0328] |
| Data/restraints/parameters                                   | 3216/0/208                                                    |
| Goodness-of-fit on F <sup>2</sup>                            | 1.042                                                         |
| Final R indexes [I >= 2σ (I)]                                | R <sub>1</sub> = 0.0417, wR <sub>2</sub> = 0.1036             |
| Final R indexes [all data]                                   | R <sub>1</sub> = 0.0521, wR <sub>2</sub> = 0.1141             |
| Largest diff. peak/hole / e Å <sup>-3</sup>                  | 0.23/-0.22                                                    |

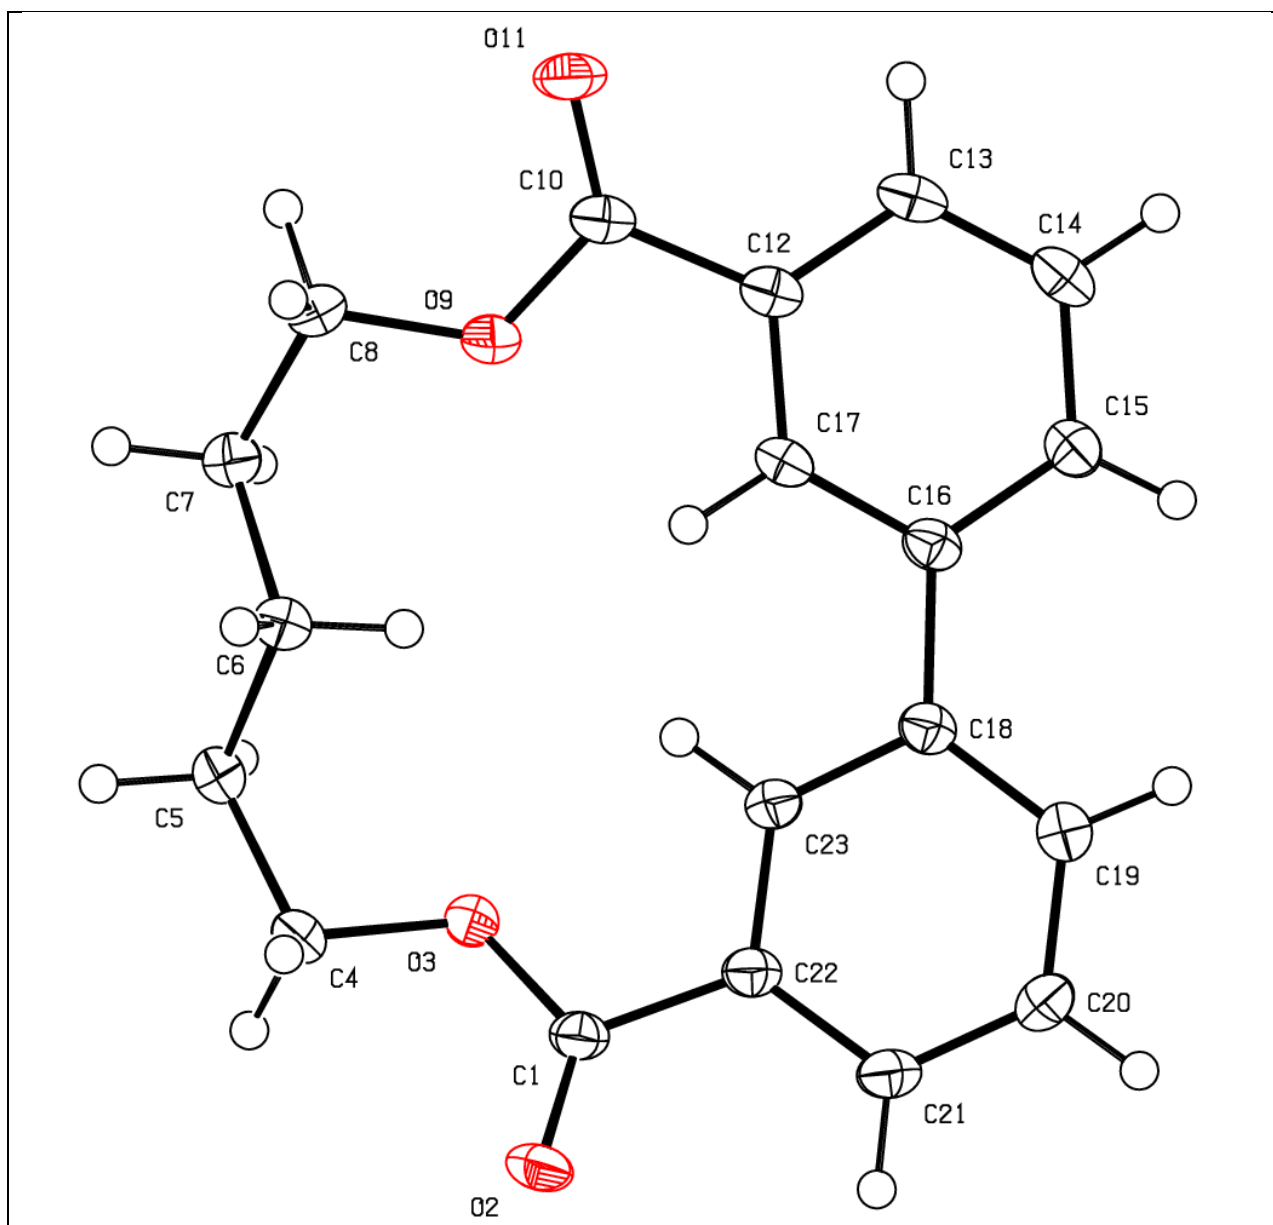

Fig.1. Asymmetric unit of **2r**. Anisotropic displacement parameters were drawn at 50% probability level. CCDC: 2048962

**Table 2 Crystal data and structure refinement for 2t.**

|                                    |                                                               |
|------------------------------------|---------------------------------------------------------------|
| Identification code                | 2t                                                            |
| Empirical formula                  | C <sub>24</sub> H <sub>32</sub> O <sub>2</sub>                |
| Formula weight                     | 352.49                                                        |
| Temperature/K                      | 100.0                                                         |
| Crystal system                     | monoclinic                                                    |
| Space group                        | C2/c                                                          |
| a/Å                                | 11.4588(5)                                                    |
| b/Å                                | 7.6111(3)                                                     |
| c/Å                                | 22.9097(9)                                                    |
| α/°                                | 90                                                            |
| β/°                                | 94.3530(10)                                                   |
| γ/°                                | 90                                                            |
| Volume/Å <sup>3</sup>              | 1992.28(14)                                                   |
| Z                                  | 4                                                             |
| ρ <sub>calc</sub> /cm <sup>3</sup> | 1.175                                                         |
| μ/mm <sup>-1</sup>                 | 0.559                                                         |
| F(000)                             | 768.0                                                         |
| Crystal size/mm <sup>3</sup>       | 0.18 × 0.17 × 0.12                                            |
| Radiation                          | CuKα (λ = 1.54178)                                            |
| 2θ range for data collection/°     | 7.74 to 159.884                                               |
| Index ranges                       | -14 ≤ h ≤ 14, -9 ≤ k ≤ 9, -29 ≤ l ≤ 29                        |
| Reflections collected              | 15199                                                         |
| Independent reflections            | 2150 [R <sub>int</sub> = 0.0413, R <sub>sigma</sub> = 0.0269] |
| Data/restraints/parameters         | 2150/0/118                                                    |
| Goodness-of-fit on F <sup>2</sup>  | 1.045                                                         |
| Final R indexes [I >= 2σ (I)]      | R <sub>1</sub> = 0.0359, wR <sub>2</sub> = 0.0982             |

Final R indexes [all data]  $R_1 = 0.0367$ ,  $wR_2 = 0.0992$   
 Largest diff. peak/hole /  $e \text{ \AA}^{-3}$  0.23/-0.18

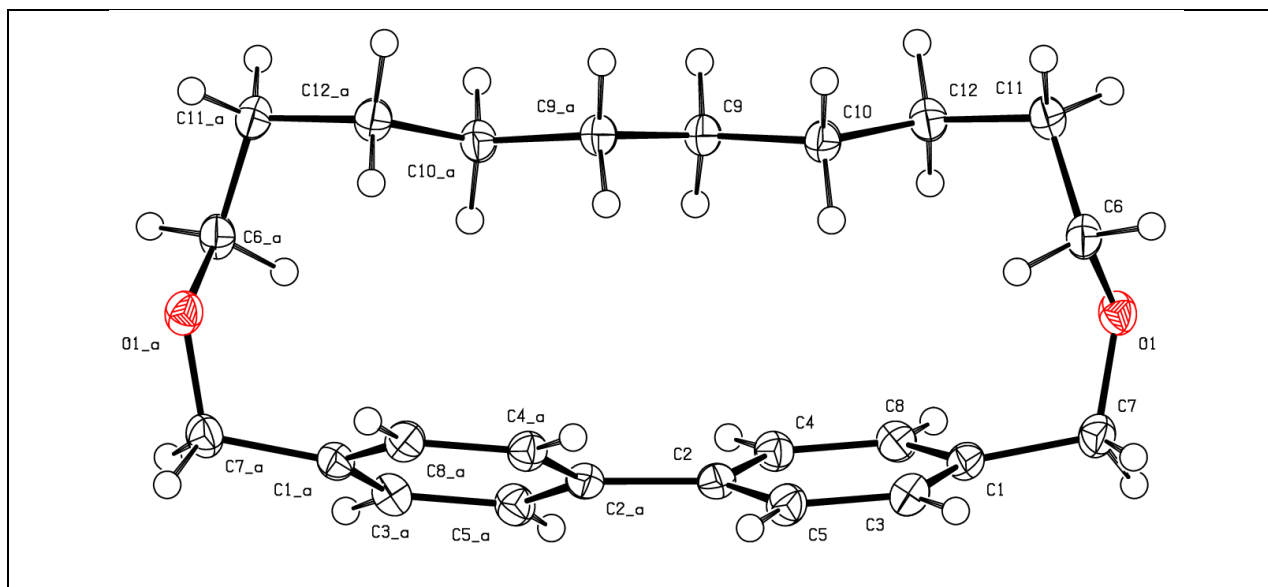

Fig.2. Ellipsoid plot of **2t**. Anisotropic displacement parameters were drawn at 50% probability level. CCDC: 2048963

**Table 3 Crystal data and structure refinement for 2v.**

|                     |                   |
|---------------------|-------------------|
| Identification code | 2v                |
| Empirical formula   | $C_{20}H_{24}O_2$ |
| Formula weight      | 296.39            |
| Temperature/K       | 100.0             |
| Crystal system      | monoclinic        |
| Space group         | $C2/c$            |
| $a/\text{\AA}$      | 21.5319(9)        |

|                                             |                                                                |
|---------------------------------------------|----------------------------------------------------------------|
| b/Å                                         | 7.5076(3)                                                      |
| c/Å                                         | 11.3927(5)                                                     |
| $\alpha$ /°                                 | 90                                                             |
| $\beta$ /°                                  | 119.9544(9)                                                    |
| $\gamma$ /°                                 | 90                                                             |
| Volume/Å <sup>3</sup>                       | 1595.66(12)                                                    |
| Z                                           | 4                                                              |
| $\rho_{\text{calc}}$ /cm <sup>3</sup>       | 1.234                                                          |
| $\mu$ /mm <sup>-1</sup>                     | 0.607                                                          |
| F(000)                                      | 640.0                                                          |
| Crystal size/mm <sup>3</sup>                | 0.2 × 0.16 × 0.1                                               |
| Radiation                                   | CuK $\alpha$ ( $\lambda$ = 1.54178)                            |
| 2 $\Theta$ range for data collection/°      | 9.482 to 159.858                                               |
| Index ranges                                | -27 ≤ h ≤ 27, -9 ≤ k ≤ 9, -13 ≤ l ≤ 14                         |
| Reflections collected                       | 19312                                                          |
| Independent reflections                     | 1702 [ $R_{\text{int}}$ = 0.0426, $R_{\text{sigma}}$ = 0.0233] |
| Data/restraints/parameters                  | 1702/0/100                                                     |
| Goodness-of-fit on F <sup>2</sup>           | 1.043                                                          |
| Final R indexes [ $I \geq 2\sigma(I)$ ]     | $R_1$ = 0.0385, $wR_2$ = 0.1053                                |
| Final R indexes [all data]                  | $R_1$ = 0.0395, $wR_2$ = 0.1067                                |
| Largest diff. peak/hole / e Å <sup>-3</sup> | 0.24/-0.26                                                     |

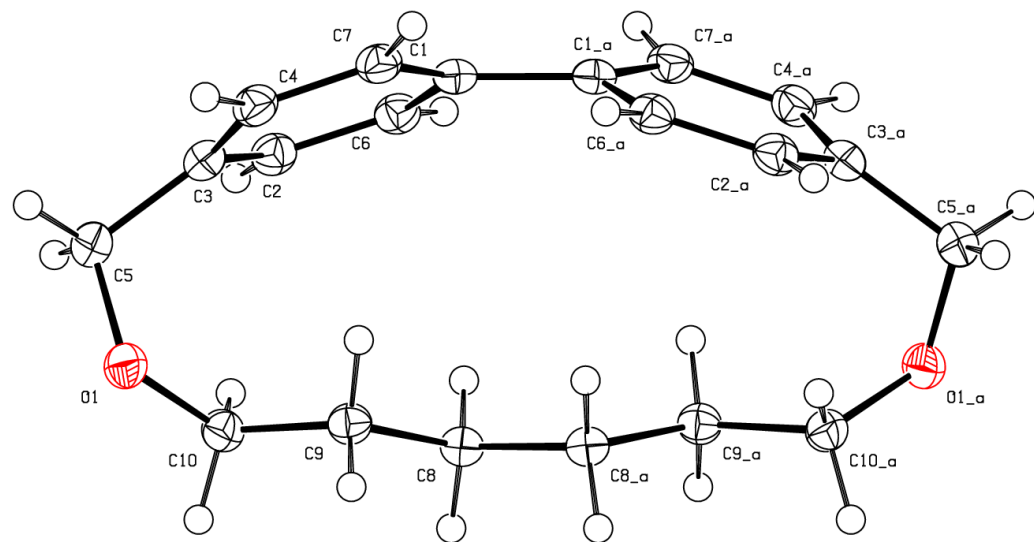

Fig.3. Ellipsoid plot of **2v**. Anisotropic displacement parameters were drawn at 50% probability level. CCDC: 2048964

## V. Compound Characterization

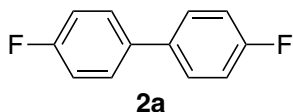

### 4,4'-difluoro-1,1'-biphenyl

**2a** was prepared following the general procedure 2.1 and purified by column chromatography (hexane) as a white solid

$^1\text{H NMR}$  (600 MHz, Chloroform-*d*)  $\delta$  7.49 (dd,  $J = 8.5, 5.4$  Hz, 4H), 7.13 (t,  $J = 8.6$  Hz, 4H).

$^{13}\text{C NMR}$  (151 MHz, Chloroform-*d*)  $\delta$  162.44 (d,  $J = 246.3$  Hz), 136.41 (d,  $J = 3.3$  Hz), 128.60 (d,  $J = 8.0$  Hz), 115.72 (d,  $J = 21.5$  Hz).

$^{19}\text{F NMR}$  (564 MHz, Chloroform-*d*)  $\delta$  -115.72.

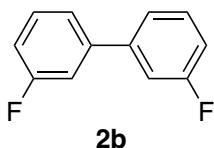

### 3,3'-difluoro-1,1'-biphenyl

**2b** was prepared following the general procedure 2.1 and purified by column chromatography (hexane) as a white solid

$^1\text{H NMR}$  (600 MHz, Chloroform-*d*)  $\delta$  7.40 (td,  $J = 7.9, 5.9$  Hz, 2H), 7.34 (dt,  $J = 7.8, 1.3$  Hz, 2H), 7.26 (ddd,  $J = 10.3, 2.7, 1.8$  Hz, 2H), 7.06 (tdd,  $J = 8.3, 2.5, 1.0$  Hz, 2H).

$^{13}\text{C NMR}$  (151 MHz, Chloroform-*d*)  $\delta$  163.19 (d,  $J = 245.9$  Hz), 142.18 (d,  $J = 7.9$  Hz), 130.42 (d,  $J = 8.6$  Hz), 122.76 (d,  $J = 3.1$  Hz), 114.69 (d,  $J = 21.3$  Hz), 114.07 (d,  $J = 22.1$  Hz).

$^{19}\text{F NMR}$  (564 MHz, Chloroform-*d*)  $\delta$  -112.75.

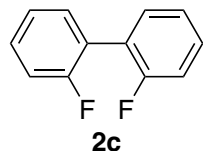

### 2,2'-difluoro-1,1'-biphenyl

**2c** was prepared following the general procedure 2.1 and purified by column chromatography (hexane) as a white solid

$^1\text{H NMR}$  (600 MHz, Chloroform-*d*)  $\delta$  7.43 – 7.34 (m, 2H), 7.22 (td,  $J = 7.5, 1.2$  Hz, 1H), 7.20 – 7.14 (m, 1H).

$^{13}\text{C}$  NMR (151 MHz, Chloroform-*d*)  $\delta$  159.85 (d,  $J = 249.8$  Hz), 131.63, 129.79 (t,  $J = 4.3$  Hz), 124.09, 123.54 (d,  $J = 11.7$  Hz), 115.81 (dd,  $J = 17.6, 4.7$  Hz).

$^{19}\text{F}$  NMR (564 MHz, Chloroform-*d*)  $\delta$  -114.82.

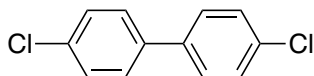

**2d**

#### 4,4'-dichloro-1,1'-biphenyl

**2d** was prepared following the general procedure 2.1 and purified by column chromatography (hexane) as a white solid

$^1\text{H}$  NMR (600 MHz, Chloroform-*d*)  $\delta$  7.47 (d,  $J = 8.6$  Hz, 1H), 7.40 (d,  $J = 8.5$  Hz, 1H).

$^{13}\text{C}$  NMR (151 MHz,  $\text{CDCl}_3$ )  $\delta$  138.44, 133.75, 129.07, 128.25.

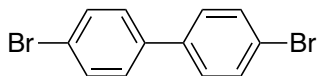

**2e**

#### 4,4'-dibromo-1,1'-biphenyl

**2e** was prepared following the general procedure 2.1 and purified by column chromatography (hexane) as a white solid

$^1\text{H}$  NMR (600 MHz, Chloroform-*d*)  $\delta$  7.56 (d,  $J = 8.5$  Hz, 4H), 7.42 (d,  $J = 8.5$  Hz, 4H).

$^{13}\text{C}$  NMR (151 MHz,  $\text{CDCl}_3$ )  $\delta$  138.93, 132.05, 128.54, 121.97.

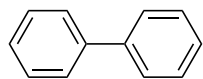

**2f**

#### 1,1'-biphenyl

**2f** was prepared following the general procedure 2.1 and purified by column chromatography (hexane) as a white solid

$^1\text{H}$  NMR (600 MHz, Chloroform-*d*)  $\delta$  7.66 – 7.57 (m, 4H), 7.50 – 7.42 (m, 4H), 7.36 (d,  $J = 7.4$  Hz, 2H).

$^{13}\text{C}$  NMR (151 MHz,  $\text{CDCl}_3$ )  $\delta$  141.25, 128.78, 127.28, 127.20.



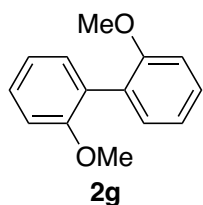

### 2,2'-dimethoxy-1,1'-biphenyl

**2g** was prepared following the general procedure 2.1 and purified by column chromatography (hexane/EA = 10:1) as a white solid

$^1\text{H NMR}$  (600 MHz, Chloroform-*d*)  $\delta$  7.33 (ddd,  $J = 8.2, 7.4, 1.8$  Hz, 2H), 7.25 (dd,  $J = 7.5, 1.9$  Hz, 2H), 7.06 – 6.96 (m, 4H), 3.77 (s, 6H).

$^{13}\text{C NMR}$  (151 MHz,  $\text{CDCl}_3$ )  $\delta$  157.04, 131.50, 128.66, 127.80, 120.37, 111.09, 55.72.

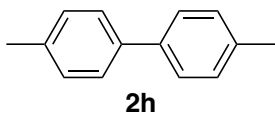

### 4,4'-dimethyl-1,1'-biphenyl

**2h** was prepared following the general procedure 2.1 and purified by column chromatography (hexane) as a white solid

$^1\text{H NMR}$  (600 MHz, Chloroform-*d*)  $\delta$  7.47 (d,  $J = 8.1$  Hz, 4H), 7.23 (d,  $J = 7.9$  Hz, 4H), 2.38 (s, 6H).

$^{13}\text{C NMR}$  (151 MHz,  $\text{CDCl}_3$ )  $\delta$  138.32, 136.75, 129.49, 126.86, 21.15.

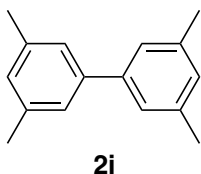

### 3,3',5,5'-tetramethyl-1,1'-biphenyl

**2i** was prepared following the general procedure 2.1 and purified by column chromatography (hexane) as a colorless oil

$^1\text{H NMR}$  (600 MHz, Chloroform-*d*)  $\delta$  7.23 – 7.14 (m, 4H), 6.98 (d,  $J = 1.7$  Hz, 2H), 2.37 (s, 12H).

$^{13}\text{C NMR}$  (151 MHz,  $\text{CDCl}_3$ )  $\delta$  141.47, 138.14, 128.76, 125.14, 21.45.

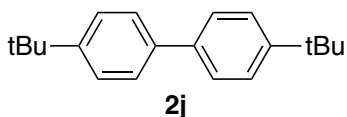

### 4,4'-di-tert-butyl-1,1'-biphenyl

**2j** was prepared following the general procedure 2.1 and purified by column chromatography (hexane) as a white solid

$^1\text{H NMR}$  (600 MHz, Chloroform-*d*)  $\delta$  7.53 (d,  $J = 8.4$  Hz, 4H), 7.45 (d,  $J = 8.4$  Hz, 4H), 1.36 (s, 18H).

$^{13}\text{C NMR}$  (151 MHz,  $\text{CDCl}_3$ )  $\delta$  149.93, 138.23, 126.71, 125.68, 34.55, 31.44.

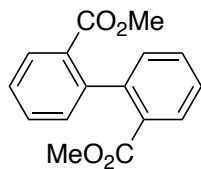

**2k**

**dimethyl [1,1'-biphenyl]-2,2'-dicarboxylate**

**2k** was prepared following the general procedure 2.1 and purified by column chromatography (hexane/EA = 10:1) as a colorless oil

$^1\text{H NMR}$  (600 MHz, Chloroform-*d*)  $\delta$  8.01 (dt,  $J = 7.9, 0.9$  Hz, 2H), 7.54 (td,  $J = 7.5, 1.4$  Hz, 2H), 7.43 (td,  $J = 7.6, 1.3$  Hz, 2H), 7.21 (dt,  $J = 7.6, 0.9$  Hz, 2H), 3.62 (s, 6H).

$^{13}\text{C NMR}$  (151 MHz,  $\text{CDCl}_3$ )  $\delta$  167.43, 143.31, 131.51, 130.20, 129.87, 129.32, 127.20, 51.86.

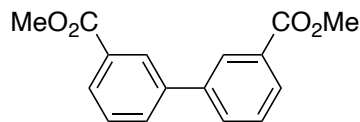

**2l**

**dimethyl [1,1'-biphenyl]-3,3'-dicarboxylate**

**2l** was prepared following the general procedure 2.1 and purified by column chromatography (hexane/EA = 10:1) as a white solid

$^1\text{H NMR}$  (600 MHz, Chloroform-*d*)  $\delta$  8.30 (t,  $J = 1.8$  Hz, 2H), 8.05 (dt,  $J = 7.8, 1.4$  Hz, 2H), 7.81 (ddd,  $J = 7.7, 2.0, 1.2$  Hz, 2H), 7.53 (t,  $J = 7.7$  Hz, 2H), 3.96 (s, 6H).

$^{13}\text{C NMR}$  (151 MHz,  $\text{CDCl}_3$ )  $\delta$  166.93, 140.38, 131.56, 130.84, 129.05, 128.84, 128.27, 52.30.

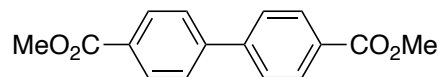

**2m**

**dimethyl [1,1'-biphenyl]-4,4'-dicarboxylate**

**2m** was prepared following the general procedure 2.1 and purified by column chromatography (hexane/EA = 10:1) as a white solid

$^1\text{H NMR}$  (600 MHz, Chloroform-*d*)  $\delta$  8.19 – 8.11 (m, 4H), 7.75 – 7.61 (m, 4H), 3.95 (s, 8H).

$^{13}\text{C NMR}$  (151 MHz,  $\text{CDCl}_3$ )  $\delta$  166.84, 144.36, 130.23, 129.69, 127.28, 52.28.

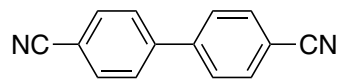

**2n**

**[1,1'-biphenyl]-4,4'-dicarbonitrile**

**2n** was prepared following the general procedure 2.1 and purified by column chromatography (hexane/EA = 5:1) as a white solid

**<sup>1</sup>H NMR** (600 MHz, Chloroform-*d*) δ 7.79 (d, *J* = 8.5 Hz, 4H), 7.70 (d, *J* = 8.4 Hz, 4H).

**<sup>13</sup>C NMR** (151 MHz, CDCl<sub>3</sub>) δ 143.54, 132.93, 127.97, 118.46, 112.43.

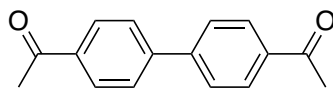

**2o**

**1,1'-([1,1'-biphenyl]-4,4'-diyl)bis(ethan-1-one)**

**2o** was prepared following the general procedure 2.1 and purified by column chromatography (hexane/EA = 10:1) as a white solid

**<sup>1</sup>H NMR** (600 MHz, Chloroform-*d*) δ 8.07 (d, *J* = 8.4 Hz, 4H), 7.73 (d, *J* = 8.4 Hz, 4H), 2.66 (s, 6H).

**<sup>13</sup>C NMR** (151 MHz, CDCl<sub>3</sub>) δ 197.72, 144.37, 136.55, 129.05, 127.48, 26.77.

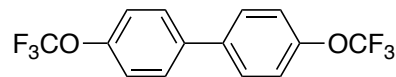

**2p**

**4,4'-bis(trifluoromethoxy)-1,1'-biphenyl**

**2p** was prepared following the general procedure 2.1 and purified by column chromatography (hexane) as a white solid

**<sup>1</sup>H NMR** (600 MHz, Chloroform-*d*) δ 7.63 – 7.50 (m, 4H), 7.29 (dt, *J* = 7.7, 1.1 Hz, 4H).

**<sup>13</sup>C NMR** (151 MHz, CDCl<sub>3</sub>) δ 148.94, 138.59, 128.49, 121.38, 120.52 (q, *J* = 258.1 Hz).

**<sup>19</sup>F NMR** (564 MHz, Chloroform-*d*) δ -57.85.

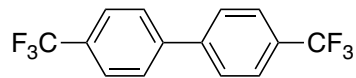

**2q**

**4,4'-bis(trifluoromethyl)-1,1'-biphenyl**

**2q** was prepared following the general procedure 2.1 and purified by column chromatography (hexane) as a white solid

**<sup>1</sup>H NMR** (600 MHz, Chloroform-*d*) δ 7.74 (d, *J* = 8.4 Hz, 4H), 7.70 (d, *J* = 8.3 Hz, 4H).

$^{13}\text{C}$  NMR (151 MHz,  $\text{CDCl}_3$ )  $\delta$  143.26, 130.28 (q,  $J = 32.5$  Hz), 127.66, 125.97 (q,  $J = 3.8$  Hz), 124.12 (q,  $J = 272.1$  Hz).

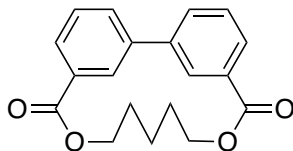

**2r**

**4,10-dioxa-1,2(1,3)-dibenzenacycloundecaphane-3,11-dione**

**2r** was prepared following the general procedure 2.3 and purified by column chromatography (hexane/EA = 10:1) as a white solid

$^1\text{H}$  NMR (600 MHz, Chloroform-*d*)  $\delta$  8.90 (t,  $J = 1.9$  Hz, 2H), 7.93 (ddd,  $J = 7.7, 1.8, 0.9$  Hz, 2H), 7.88 (ddd,  $J = 7.6, 2.1, 0.9$  Hz, 2H), 7.54 (t,  $J = 7.7$  Hz, 2H), 4.45 – 4.32 (m, 4H), 2.14 (qd,  $J = 10.5, 9.4, 5.7$  Hz, 2H), 1.86 (dddd,  $J = 10.7, 9.0, 6.7, 5.0$  Hz, 4H).

$^{13}\text{C}$  NMR (151 MHz,  $\text{CDCl}_3$ )  $\delta$  165.35, 139.06, 133.68, 131.79, 129.23, 128.59, 127.50, 64.14, 30.12, 22.85.

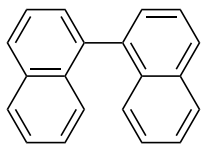

**2s**

**2s** was prepared following the general procedure 2.1 and purified by column chromatography (hexane) as a white solid

$^1\text{H}$  NMR (600 MHz, Chloroform-*d*)  $\delta$  7.95 (ddt,  $J = 7.7, 5.2, 1.0$  Hz, 2H), 7.59 (dd,  $J = 8.3, 6.9$  Hz, 1H), 7.52 – 7.45 (m, 2H), 7.39 (dd,  $J = 8.6, 1.2$  Hz, 1H), 7.28 (ddd,  $J = 8.3, 6.7, 1.3$  Hz, 1H).

$^{13}\text{C}$  NMR (151 MHz,  $\text{CDCl}_3$ )  $\delta$  138.46, 133.52, 132.85, 128.17, 127.91, 127.85, 126.58, 126.00, 125.83, 125.41.

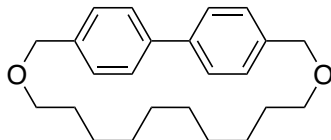

**2t**

**4,15-dioxa-1,2(1,4)-dibenzenacyclohexadecaphane**

**2t** was prepared following the general procedure 2.3 and purified by column chromatography (hexane/EA = 20:1) as a white solid

$^1\text{H}$  NMR (600 MHz, Chloroform-*d*)  $\delta$  7.68 (d,  $J = 8.2$  Hz, 3H), 7.45 (d,  $J = 8.2$  Hz, 3H), 4.48 (s, 4H), 3.31 (dd,  $J = 6.0, 4.8$  Hz, 4H), 1.30 – 1.20 (m, 6H), 0.87 (tt,  $J = 12.0, 5.7$  Hz, 5H), 0.50 (dt,  $J = 7.9, 3.4$  Hz, 4H), 0.32 – 0.20 (m, 5H).

$^{13}\text{C}$  NMR (151 MHz,  $\text{CDCl}_3$ )  $\delta$  139.75, 137.96, 130.44, 126.40, 72.21, 65.17, 31.55, 29.95, 29.25, 25.10.

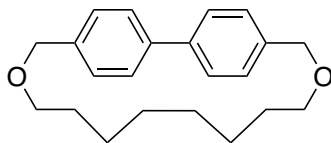

**2u**

**4,13-dioxa-1,2(1,4)-dibenzenacyclotetradecaphane**

**2u** was prepared following the general procedure 2.3 and purified by column chromatography (hexane/EA = 20:1) as a white solid

$^1\text{H NMR}$  (600 MHz, Chloroform-*d*)  $\delta$  7.70 (d,  $J = 8.2$  Hz, 4H), 7.45 (d,  $J = 8.2$  Hz, 4H), 4.52 (s, 4H), 3.21 (t,  $J = 6.5$  Hz, 4H), 0.63 – 0.47 (m, 8H), 0.35 (p,  $J = 3.1$  Hz, 4H).

$^{13}\text{C NMR}$  (151 MHz,  $\text{CDCl}_3$ )  $\delta$  140.12, 137.94, 130.92, 126.71, 73.61, 68.46, 30.83, 30.13, 26.00.

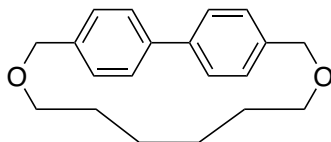

**2v**

**4,11-dioxa-1,2(1,4)-dibenzenacyclododecaphane**

**2v** was prepared following the general procedure 2.3 and purified by column chromatography (hexane/EA = 20:1) as a white solid

$^1\text{H NMR}$  (600 MHz, Chloroform-*d*)  $\delta$  7.75 (d,  $J = 8.4$  Hz, 4H), 7.40 (d,  $J = 8.4$  Hz, 4H), 4.45 (s, 4H), 3.09 – 2.97 (m, 4H), 0.14 (dt,  $J = 8.6, 3.6$  Hz, 4H), -0.00 – -0.06 (m, 4H).

$^{13}\text{C NMR}$  (151 MHz,  $\text{CDCl}_3$ )  $\delta$  140.23, 136.68, 131.27, 126.97, 73.85, 68.47, 31.01, 25.96.

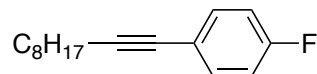

**5a**

**1-(dec-1-yn-1-yl)-4-fluorobenzene**

**5a** was prepared following the general procedure 2.2 and purified by column chromatography (hexane) as a colorless oil.

$^1\text{H NMR}$  (600 MHz, Chloroform-*d*)  $\delta$  7.43 – 7.31 (m, 2H), 6.97 (t,  $J = 8.7$  Hz, 2H), 2.38 (t,  $J = 7.2$  Hz, 2H), 1.59 (p,  $J = 7.2$  Hz, 2H), 1.48 – 1.38 (m, 2H), 1.36 – 1.22 (m, 8H), 0.94 – 0.85 (m, 3H).

$^{13}\text{C NMR}$  (151 MHz,  $\text{CDCl}_3$ )  $\delta$  162.01 (d,  $J = 248.1$  Hz), 133.30 (d,  $J = 8.2$  Hz), 120.15 (d,  $J = 3.5$  Hz), 115.37 (d,  $J = 21.8$  Hz), 90.11, 79.47, 31.88, 29.24, 29.16, 28.97, 28.74, 22.70, 19.36, 14.14.

$^{19}\text{F NMR}$  (564 MHz, Chloroform-*d*)  $\delta$  -112.48.

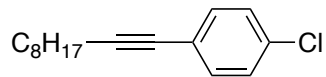

**5b**

**1-chloro-4-(dec-1-yn-1-yl)benzene**

**5b** was prepared following the general procedure 2.2 and purified by column chromatography (hexane) as a colorless oil.

**<sup>1</sup>H NMR** (600 MHz, Chloroform-*d*) δ 7.31 (d, *J* = 8.5 Hz, 2H), 7.25 (d, *J* = 8.5 Hz, 2H), 2.39 (t, *J* = 7.2 Hz, 2H), 1.59 (p, *J* = 7.3 Hz, 2H), 1.43 (p, *J* = 7.0 Hz, 2H), 1.34 – 1.27 (m, 8H), 0.89 (t, *J* = 6.9 Hz, 3H).

**<sup>13</sup>C NMR** (151 MHz, CDCl<sub>3</sub>) δ 133.36, 132.78, 128.49, 122.61, 91.61, 79.50, 31.87, 29.22, 29.14, 28.96, 28.67, 22.69, 19.42, 14.15.

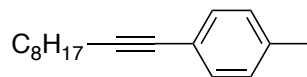

**5c**

**1-(dec-1-yn-1-yl)-4-methylbenzene**

**5c** was prepared following the general procedure 2.2 and purified by column chromatography (hexane) as a colorless oil.

**<sup>1</sup>H NMR** (600 MHz, Chloroform-*d*) δ 7.28 (d, *J* = 8.1 Hz, 2H), 7.08 (d, *J* = 7.9 Hz, 2H), 2.39 (t, *J* = 7.2 Hz, 2H), 2.33 (s, 3H), 1.64 – 1.58 (m, 2H), 1.49 – 1.40 (m, 2H), 1.35 – 1.27 (m, 8H), 0.88 (t, *J* = 7.0 Hz, 3H).

**<sup>13</sup>C NMR** (151 MHz, CDCl<sub>3</sub>) δ 137.42, 131.41, 128.95, 120.99, 89.69, 80.54, 31.88, 29.24, 29.17, 28.97, 28.85, 22.70, 21.43, 19.45, 14.15.

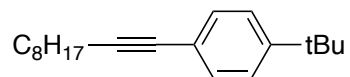

**5d**

**1-(tert-butyl)-4-(dec-1-yn-1-yl)benzene**

**5d** was prepared following the general procedure 2.2 and purified by column chromatography (hexane) as a colorless oil.

**<sup>1</sup>H NMR** (600 MHz, Chloroform-*d*) δ 7.33 (d, *J* = 8.5 Hz, 2H), 7.30 (d, *J* = 8.7 Hz, 2H), 1.64 – 1.57 (m, 2H), 1.43 (q, *J* = 7.0 Hz, 2H), 1.30 (s, 17H), 0.88 (t, *J* = 7.0 Hz, 3H).

**<sup>13</sup>C NMR** (151 MHz, CDCl<sub>3</sub>) δ 150.58, 131.22, 125.18, 121.08, 89.72, 80.52, 34.67, 31.88, 31.22, 29.25, 29.17, 28.95, 28.86, 22.70, 19.45, 14.15.

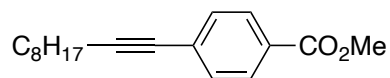

**5e**

**methyl 4-(dec-1-yn-1-yl)benzoate**

**5e** was prepared following the general procedure 2.2 and purified by column chromatography (hexane/EA = 10:1) as a colorless oil.

**<sup>1</sup>H NMR** (600 MHz, Chloroform-*d*)  $\delta$  7.95 (d,  $J$  = 8.6 Hz, 2H), 7.44 (d,  $J$  = 8.4 Hz, 2H), 3.91 (s, 3H), 2.42 (t,  $J$  = 7.1 Hz, 2H), 1.61 (p,  $J$  = 7.2 Hz, 2H), 1.45 (dq,  $J$  = 9.5, 7.2 Hz, 2H), 1.34 – 1.27 (m, 8H), 0.91 – 0.87 (m, 3H).

**<sup>13</sup>C NMR** (151 MHz, CDCl<sub>3</sub>)  $\delta$  166.73, 131.48, 129.41, 128.96, 128.79, 94.08, 80.10, 52.19, 31.86, 29.22, 29.13, 28.96, 28.59, 22.69, 19.53, 14.15.

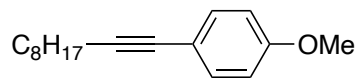

**5f**

**1-(dec-1-yn-1-yl)-4-methoxybenzene**

**5f** was prepared following the general procedure 2.2 and purified by column chromatography (hexane/EA = 10:1) as a colorless oil.

**<sup>1</sup>H NMR** (600 MHz, Chloroform-*d*)  $\delta$  7.33 (d,  $J$  = 8.7 Hz, 2H), 6.81 (d,  $J$  = 8.8 Hz, 2H), 3.80 (s, 3H), 2.38 (t,  $J$  = 7.1 Hz, 2H), 1.59 (p,  $J$  = 7.3 Hz, 2H), 1.49 – 1.39 (m, 2H), 1.36 – 1.26 (m, 8H), 0.88 (t,  $J$  = 6.9 Hz, 3H).

**<sup>13</sup>C NMR** (151 MHz, CDCl<sub>3</sub>)  $\delta$  158.95, 132.86, 116.26, 113.79, 88.86, 80.21, 55.27, 31.88, 29.25, 29.17, 28.98, 28.90, 22.70, 19.44, 14.15.

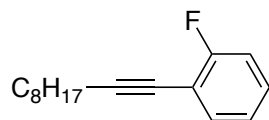

**5g**

**1-(dec-1-yn-1-yl)-2-fluorobenzene**

**5g** was prepared following the general procedure 2.2 and purified by column chromatography (hexane) as a colorless oil.

**<sup>1</sup>H NMR** (600 MHz, Chloroform-*d*)  $\delta$  7.39 (td,  $J$  = 7.5, 1.9 Hz, 1H), 7.26 – 7.21 (m, 1H), 7.08 – 7.02 (m, 2H), 2.45 (t,  $J$  = 7.1 Hz, 2H), 1.62 (p,  $J$  = 7.2 Hz, 2H), 1.46 (tt,  $J$  = 9.4, 6.1 Hz, 2H), 1.30 (ddd,  $J$  = 15.3, 8.4, 3.0 Hz, 8H), 0.95 – 0.84 (m, 3H).

**<sup>13</sup>C NMR** (151 MHz, CDCl<sub>3</sub>)  $\delta$  162.81 (d,  $J$  = 249.9 Hz), 129.07 (d,  $J$  = 7.8 Hz), 123.78 (d,  $J$  = 3.8 Hz), 115.35 (d,  $J$  = 21.0 Hz), 112.53 (d,  $J$  = 15.8 Hz), 133.56, 96.04, 73.85, 31.87, 29.23, 29.14, 28.91, 28.63, 22.70, 19.63, 14.15.

**<sup>19</sup>F NMR** (564 MHz, Chloroform-*d*)  $\delta$  -111.14.

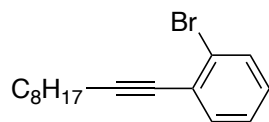

**5h**

**1-bromo-2-(dec-1-yn-1-yl)benzene**

**5h** was prepared following the general procedure 2.2 and purified by column chromatography (hexane) as a colorless oil.

**<sup>1</sup>H NMR** (600 MHz, Chloroform-*d*)  $\delta$  7.55 (dd,  $J = 8.1, 1.2$  Hz, 1H), 7.42 (dd,  $J = 7.7, 1.7$  Hz, 1H), 7.22 (td,  $J = 7.6, 1.2$  Hz, 1H), 7.11 (td,  $J = 7.7, 1.7$  Hz, 1H), 2.46 (t,  $J = 7.1$  Hz, 2H), 1.64 (p,  $J = 7.1$  Hz, 2H), 1.53 – 1.46 (m, 2H), 1.35 – 1.27 (m, 8H), 0.92 – 0.86 (m, 3H).

**<sup>13</sup>C NMR** (151 MHz, CDCl<sub>3</sub>)  $\delta$  133.31, 132.27, 128.64, 126.90, 126.10, 125.46, 95.69, 79.35, 31.88, 29.25, 29.14, 28.90, 28.58, 22.70, 19.60, 14.16.

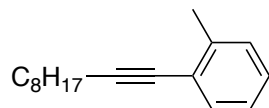

**5i**

**1-(dec-1-yn-1-yl)-2-methylbenzene**

**5i** was prepared following the general procedure 2.2 and purified by column chromatography (hexane) as a colorless oil.

**<sup>1</sup>H NMR** (600 MHz, Chloroform-*d*)  $\delta$  7.36 (d,  $J = 7.2$  Hz, 1H), 7.19 – 7.14 (m, 2H), 7.13 – 7.06 (m, 1H), 2.45 (t,  $J = 7.1$  Hz, 2H), 2.41 (s, 3H), 1.61 (p,  $J = 7.2$  Hz, 2H), 1.51 – 1.44 (m, 2H), 1.33 – 1.27 (m, 8H), 0.89 (t,  $J = 6.9$  Hz, 3H).

**<sup>13</sup>C NMR** (151 MHz, CDCl<sub>3</sub>)  $\delta$  139.94, 131.78, 129.28, 127.44, 125.41, 123.86, 94.50, 79.43, 31.88, 29.26, 29.15, 28.92, 28.84, 22.70, 20.77, 19.57, 14.15.

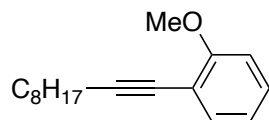

**5j**

**1-(dec-1-yn-1-yl)-2-methoxybenzene**

**5j** was prepared following the general procedure 2.2 and purified by column chromatography (hexane/EA = 20:1) as a colorless oil.

**<sup>1</sup>H NMR** (600 MHz, Chloroform-*d*)  $\delta$  7.38 (dd,  $J = 7.5, 1.8$  Hz, 1H), 7.24 (ddd,  $J = 8.2, 7.5, 1.8$  Hz, 1H), 6.90 – 6.84 (m, 2H), 3.88 (s, 3H), 2.47 (t,  $J = 7.2$  Hz, 2H), 1.63 (p,  $J = 7.3$  Hz, 2H), 1.50 – 1.43 (m, 2H), 1.30 (ddd,  $J = 14.6, 8.2, 3.3$  Hz, 6H), 0.88 (t,  $J = 6.9$  Hz, 3H).



$^{13}\text{C}$  NMR (151 MHz,  $\text{CDCl}_3$ )  $\delta$  159.79, 133.68, 128.86, 120.39, 113.13, 110.49, 94.80, 76.58, 55.80, 31.88, 29.27, 29.18, 28.98, 28.88, 22.71, 19.82, 14.15.

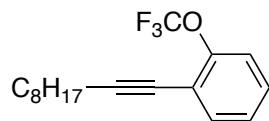

**5k**

**1-(dec-1-yn-1-yl)-2-(trifluoromethoxy)benzene**

**5k** was prepared following the general procedure 2.2 and purified by column chromatography (hexane) as a colorless oil.

$^1\text{H}$  NMR (600 MHz, Chloroform-*d*)  $\delta$  7.45 (dd,  $J = 7.6, 1.8$  Hz, 1H), 7.29 (ddd,  $J = 8.8, 7.3, 1.7$  Hz, 1H), 7.25 – 7.20 (m, 2H), 2.44 (t,  $J = 7.0$  Hz, 2H), 1.61 (p,  $J = 7.1$  Hz, 2H), 1.50 – 1.43 (m, 2H), 1.34 – 1.27 (m, 8H), 0.91 – 0.86 (m, 3H).

$^{13}\text{C}$  NMR (151 MHz,  $\text{CDCl}_3$ )  $\delta$  149.40, 133.60, 128.56, 126.61, 121.21, 120.86 (q,  $J = 258.1$  Hz), 118.82, 96.37, 74.76, 31.86, 29.21, 29.15, 28.79, 28.54, 22.69, 19.55, 14.12.

$^{19}\text{F}$  NMR (564 MHz, Chloroform-*d*)  $\delta$  -57.52.

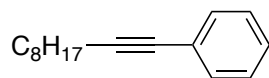

**5l**

**dec-1-yn-1-ylbenzene**

**5l** was prepared following the general procedure 2.2 and purified by column chromatography (hexane) as a colorless oil.

$^1\text{H}$  NMR (600 MHz, Chloroform-*d*)  $\delta$  7.42 – 7.34 (m, 2H), 7.32 – 7.26 (m, 2H), 2.41 (d,  $J = 7.2$  Hz, 2H), 1.64 – 1.58 (m, 2H), 1.45 (p,  $J = 7.0$  Hz, 2H), 1.33 – 1.27 (m, 8H), 0.89 (t,  $J = 6.8$  Hz, 3H).

$^{13}\text{C}$  NMR (151 MHz,  $\text{CDCl}_3$ )  $\delta$  131.55, 128.20, 127.47, 124.09, 90.53, 80.54, 31.88, 29.24, 29.16, 28.96, 28.79, 22.70, 19.44, 14.15.

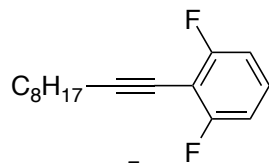

**5m**

**2-(dec-1-yn-1-yl)-1,3-difluorobenzene**

**5m** was prepared following the general procedure 2.2 and purified by column chromatography (hexane) as a colorless oil.

**<sup>1</sup>H NMR** (600 MHz, Chloroform-*d*) δ 7.19 (tt, *J* = 8.4, 6.3 Hz, 1H), 6.87 (dd, *J* = 8.4, 6.9 Hz, 2H), 2.49 (t, *J* = 7.1 Hz, 2H), 1.64 (p, *J* = 7.2 Hz, 2H), 1.50 – 1.43 (m, 2H), 1.36 – 1.26 (m, 8H), 0.88 (t, *J* = 7.0 Hz, 3H).

**<sup>13</sup>C NMR** (151 MHz, CDCl<sub>3</sub>) δ 163.29 (d, *J* = 252.2 Hz), 128.63, 111.02 (dd, *J* = 20.3, 4.6 Hz), 102.87 (t, *J* = 19.7 Hz), 101.25, 67.38, 31.84, 29.20, 29.10, 28.83, 28.46, 22.69, 19.81, 14.14.

**<sup>19</sup>F NMR** (564 MHz, Chloroform-*d*) δ -108.66.

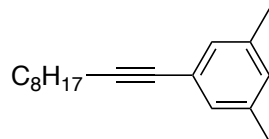

**5n**

### 1-(dec-1-yn-1-yl)-3,5-dimethylbenzene

**5n** was prepared following the general procedure 2.2 and purified by column chromatography (hexane) as a colorless oil.

**<sup>1</sup>H NMR** (600 MHz, Chloroform-*d*) δ 7.03 (d, *J* = 1.8 Hz, 2H), 6.94 – 6.84 (m, 1H), 2.38 (t, *J* = 7.1 Hz, 2H), 2.27 (s, 8H), 1.59 (dd, *J* = 15.0, 7.6 Hz, 3H), 1.49 – 1.39 (m, 2H), 1.34 – 1.27 (m, 8H), 0.89 (t, *J* = 6.9 Hz, 3H).

**<sup>13</sup>C NMR** (151 MHz, CDCl<sub>3</sub>) δ 137.72, 129.38, 129.24, 123.67, 89.74, 80.74, 31.89, 29.24, 29.17, 28.95, 28.84, 22.70, 21.12, 19.42, 14.16.

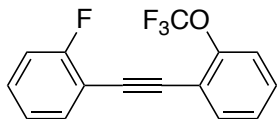

**5o**

### 1-fluoro-2-((2-(trifluoromethoxy)phenyl)ethynyl)benzene

**5o** was prepared following the general procedure 2.2 and purified by column chromatography (hexane) as a colorless oil.

**<sup>1</sup>H NMR** (600 MHz, Chloroform-*d*) δ 7.64 – 7.60 (m, 1H), 7.53 (td, *J* = 7.3, 1.8 Hz, 1H), 7.41 – 7.36 (m, 1H), 7.35 – 7.28 (m, 3H), 7.18 – 7.10 (m, 2H).

**<sup>13</sup>C NMR** (151 MHz, Chloroform-*d*) δ 162.72 (d, *J* = 252.4 Hz), 149.33, 133.56 (d, *J* = 3.1 Hz), 130.51 (d, *J* = 8.1 Hz), 129.81, 126.82, 124.03 (d, *J* = 3.7 Hz), 121.43, 120.60 (q, *J* = 249.1 Hz), 117.81, 115.62 (d, *J* = 20.6 Hz), 111.48 (d, *J* = 15.6 Hz), 88.47 (d, *J* = 3.1 Hz).

**<sup>19</sup>F NMR** (564 MHz, Chloroform-*d*) δ -57.61, -109.50.

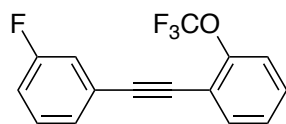

**5p**

**1-((3-fluorophenyl)ethynyl)-2-(trifluoromethoxy)benzene**

**5p** was prepared following the general procedure 2.2 and purified by column chromatography (hexane) as a colorless oil.

**<sup>1</sup>H NMR** (600 MHz, Chloroform-*d*)  $\delta$  7.59 (dd,  $J = 8.0, 1.7$  Hz, 1H), 7.41 – 7.37 (m, 1H), 7.35 – 7.28 (m, 4H), 7.24 (ddd,  $J = 10.0, 2.3, 1.3$  Hz, 1H), 7.09 – 7.05 (m, 1H).

**<sup>13</sup>C NMR** (151 MHz, Chloroform-*d*)  $\delta$  162.39 (d,  $J = 246.9$  Hz), 149.40, 133.53, 130.02 (d,  $J = 8.5$  Hz), 129.82, 127.64 (d,  $J = 3.0$  Hz), 126.85, 124.61 (d,  $J = 9.3$  Hz), 121.44, 120.60 (q,  $J = 252.2$  Hz), 118.47 (d,  $J = 22.7$  Hz), 117.67, 116.10 (d,  $J = 21.1$  Hz), 93.30, 84.34.

**<sup>19</sup>F NMR** (564 MHz, Chloroform-*d*)  $\delta$  -57.53, -112.79.

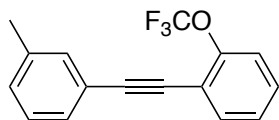

**5q**

**1-(m-tolylethynyl)-2-(trifluoromethoxy)benzene**

**5q** was prepared following the general procedure 2.2 and purified by column chromatography (hexane) as a colorless oil.

**<sup>1</sup>H NMR** (600 MHz, Chloroform-*d*)  $\delta$  7.63 – 7.55 (m, 1H), 7.38 – 7.33 (m, 3H), 7.31 – 7.28 (m, 2H), 7.28 – 7.23 (m, 1H), 7.19 – 7.16 (m, 1H), 2.37 (s, 3H).

**<sup>13</sup>C NMR** (151 MHz, CDCl<sub>3</sub>)  $\delta$  149.29, 138.12, 133.48, 132.26, 129.66, 129.35, 128.85, 128.31, 126.79, 122.60, 121.40, 120.85 (q,  $J = 256.4$  Hz), 118.25, 94.91, 83.14, 21.28.

**<sup>19</sup>F NMR** (564 MHz, Chloroform-*d*)  $\delta$  -57.48.

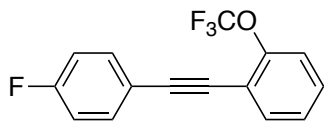

**5r**

**1-((4-fluorophenyl)ethynyl)-2-(trifluoromethoxy)benzene**

**5r** was prepared following the general procedure 2.2 and purified by column chromatography (hexane) as a colorless oil.

**<sup>1</sup>H NMR** (600 MHz, Chloroform-*d*)  $\delta$  7.58 (dd,  $J = 8.0, 1.7$  Hz, 1H), 7.55 – 7.50 (m, 2H), 7.39 – 7.35 (m, 1H), 7.31 – 7.27 (m, 2H), 7.10 – 7.04 (m, 2H).

**<sup>13</sup>C NMR** (151 MHz, Chloroform-*d*)  $\delta$  162.79 (d,  $J = 250.5$  Hz), 149.29, 133.67 (d,  $J = 8.5$  Hz), 133.39, 129.52, 126.83, 121.42, 120.63 (q,  $J = 256.5$  Hz), 118.96 (d,  $J = 3.1$  Hz), 117.97, 115.76 (d,  $J = 22.4$  Hz), 93.60, 83.22.

**<sup>19</sup>F NMR** (564 MHz, Chloroform-*d*)  $\delta$  -57.51, -110.17.

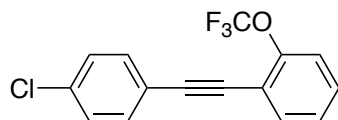

**5s**

**1-((4-chlorophenyl)ethynyl)-2-(trifluoromethoxy)benzene**

**5s** was prepared following the general procedure 2.2 and purified by column chromatography (hexane) as a colorless oil.

**<sup>1</sup>H NMR** (600 MHz, Chloroform-*d*)  $\delta$  7.58 (dd,  $J = 8.0, 1.7$  Hz, 1H), 7.49 – 7.45 (m, 2H), 7.40 – 7.36 (m, 1H), 7.36 – 7.33 (m, 2H), 7.32 – 7.28 (m, 2H).

**<sup>13</sup>C NMR** (151 MHz, CDCl<sub>3</sub>)  $\delta$  149.32, 134.80, 133.44, 132.93, 129.69, 128.79, 126.84, 121.42, 121.28, 120.65 (q,  $J = 255.2$  Hz), 117.81, 93.50, 84.44.

**<sup>19</sup>F NMR** (564 MHz, Chloroform-*d*)  $\delta$  -57.51.

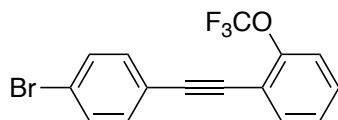

**5t**

**1-((4-bromophenyl)ethynyl)-2-(trifluoromethoxy)benzene**

**5t** was prepared following the general procedure 2.2 and purified by column chromatography (hexane) as a white solid.

**<sup>1</sup>H NMR** (600 MHz, Chloroform-*d*)  $\delta$  7.58 (dd,  $J = 8.0, 1.7$  Hz, 1H), 7.52 – 7.49 (m, 2H), 7.42 – 7.39 (m, 2H), 7.39 – 7.36 (m, 1H), 7.32 – 7.28 (m, 2H).

**<sup>13</sup>C NMR** (151 MHz, CDCl<sub>3</sub>)  $\delta$  149.32, 133.44, 133.13, 131.72, 129.73, 126.85, 123.06, 121.75, 121.43, 120.66 (q,  $J = 256.5$  Hz), 117.79, 93.56, 84.62.

**<sup>19</sup>F NMR** (564 MHz, Chloroform-*d*)  $\delta$  -57.50.

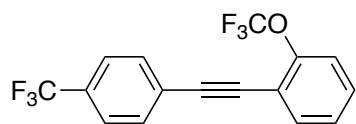

**5u**

**1-(trifluoromethoxy)-2-((4-(trifluoromethyl)phenyl)ethynyl)benzene**

**5u** was prepared following the general procedure 2.2 and purified by column chromatography (hexane) as a white solid.

<sup>1</sup>H NMR (600 MHz, Chloroform-*d*) δ 7.66 – 7.58 (m, 5H), 7.40 (ddd, *J* = 8.4, 7.3, 1.7 Hz, 1H), 7.31 (dd, *J* = 7.9, 6.8 Hz, 2H).

<sup>13</sup>C NMR (151 MHz, CDCl<sub>3</sub>) δ 149.47, 133.58, 131.94, 130.37(q, *J* = 32.7 Hz), 129.54, 126.89, 126.59, 125.36 (q, *J* = 3.9 Hz), 123.90 (q, *J* = 272.1 Hz), 121.46, 120.61 (q, *J* = 258.0 Hz), 117.44, 93.09, 85.78.

<sup>19</sup>F NMR (564 MHz, Chloroform-*d*) δ -57.55, -62.86.

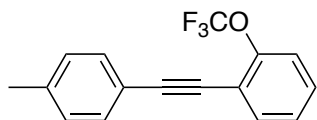

**5v**

**1-(p-tolyethynyl)-2-(trifluoromethoxy)benzene**

**5v** was prepared following the general procedure 2.2 and purified by column chromatography (hexane) as a colorless oil.

<sup>1</sup>H NMR (600 MHz, Chloroform-*d*) δ 7.58 (dd, *J* = 7.9, 1.7 Hz, 1H), 7.44 (d, *J* = 8.1 Hz, 2H), 7.35 (ddd, *J* = 8.5, 7.1, 1.7 Hz, 1H), 7.30 – 7.27 (m, 2H), 7.20 – 7.15 (m, 2H).

<sup>13</sup>C NMR (151 MHz, CDCl<sub>3</sub>) δ 149.25, 138.97, 133.40, 131.63, 129.22, 129.18, 126.77, 121.39, 120.65 (q, *J* = 258.1 Hz), 119.72, 118.36, 94.95, 82.88, 21.60.

<sup>19</sup>F NMR (564 MHz, Chloroform-*d*) δ -57.49.

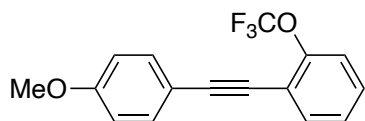

**5w**

**1-((4-methoxyphenyl)ethynyl)-2-(trifluoromethoxy)benzene**

**5w** was prepared following the general procedure 2.2 and purified by column chromatography (hexane/EA = 20:1) as a colorless oil.

<sup>1</sup>H NMR (600 MHz, Chloroform-*d*) δ 7.58 – 7.56 (m, 1H), 7.51 – 7.47 (m, 2H), 7.34 (ddd, *J* = 8.5, 7.1, 1.7 Hz, 1H), 7.31 – 7.27 (m, 2H), 6.94 – 6.87 (m, 2H), 3.84 (s, 3H).

$^{13}\text{C}$  NMR (151 MHz,  $\text{CDCl}_3$ )  $\delta$  159.97, 149.15, 133.25, 129.03, 126.76, 121.38, 120.66 (q,  $J = 258.0$  Hz), 118.49, 114.90, 114.06, 94.84, 82.30, 55.36.

$^{19}\text{F}$  NMR (564 MHz, Chloroform-*d*)  $\delta$  -57.48.

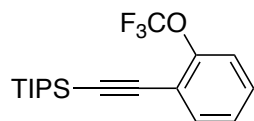

**5x**

**triisopropyl((2-(trifluoromethoxy)phenyl)ethynyl)silane**

**5x** was prepared following the general procedure 2.2 and purified by column chromatography (hexane) as a colorless oil.

$^1\text{H}$  NMR (600 MHz, Chloroform-*d*)  $\delta$  7.54 (dd,  $J = 7.6, 1.7$  Hz, 1H), 7.34 (ddd,  $J = 8.8, 7.4, 1.7$  Hz, 1H), 7.26 – 7.22 (m, 2H), 1.13 (d,  $J = 2.8$  Hz, 21H).

$^{13}\text{C}$  NMR (151 MHz,  $\text{CDCl}_3$ )  $\delta$  149.73, 134.08, 129.42, 126.61, 121.27, 120.57 (q,  $J = 252.0$  Hz), 118.33, 100.42, 97.08, 18.55, 11.22.

$^{19}\text{F}$  NMR (564 MHz, Chloroform-*d*)  $\delta$  -57.50.

## VI. NMR Spectra Data

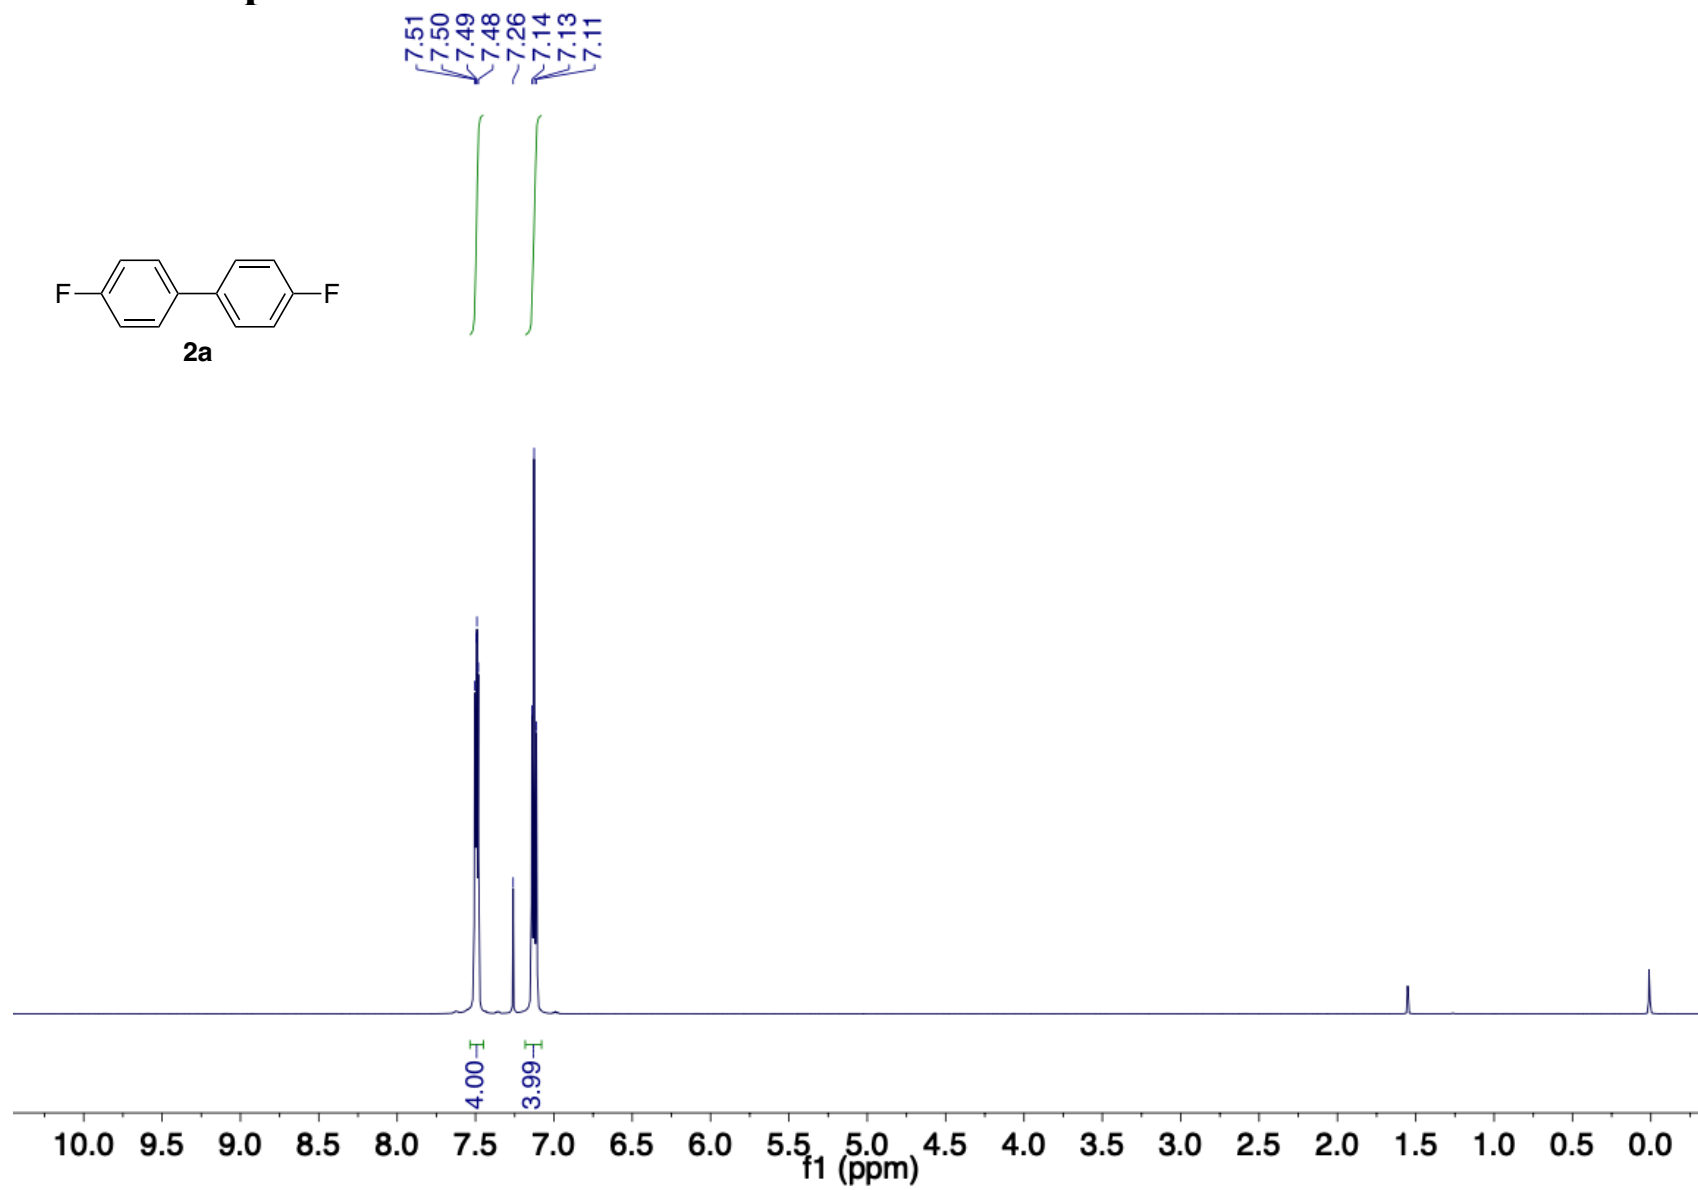

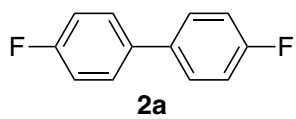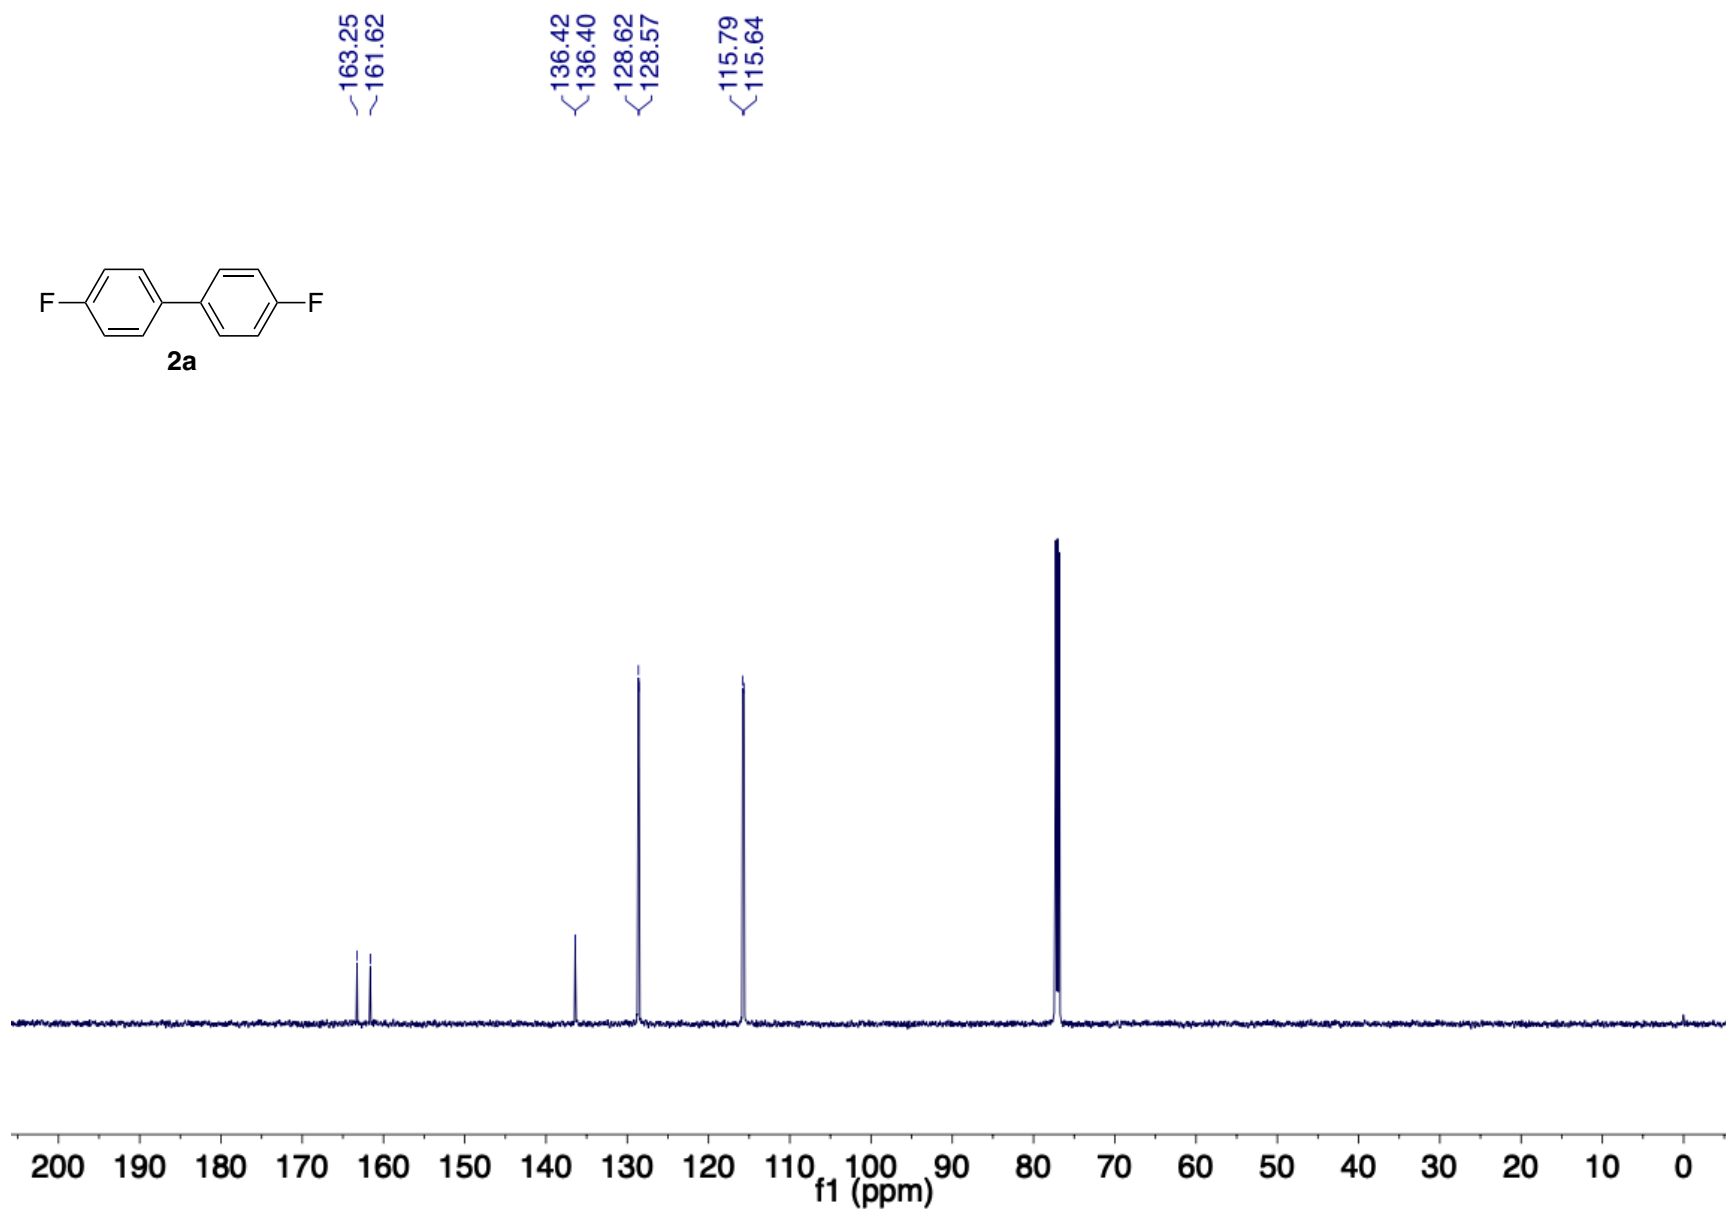



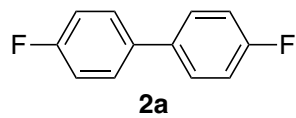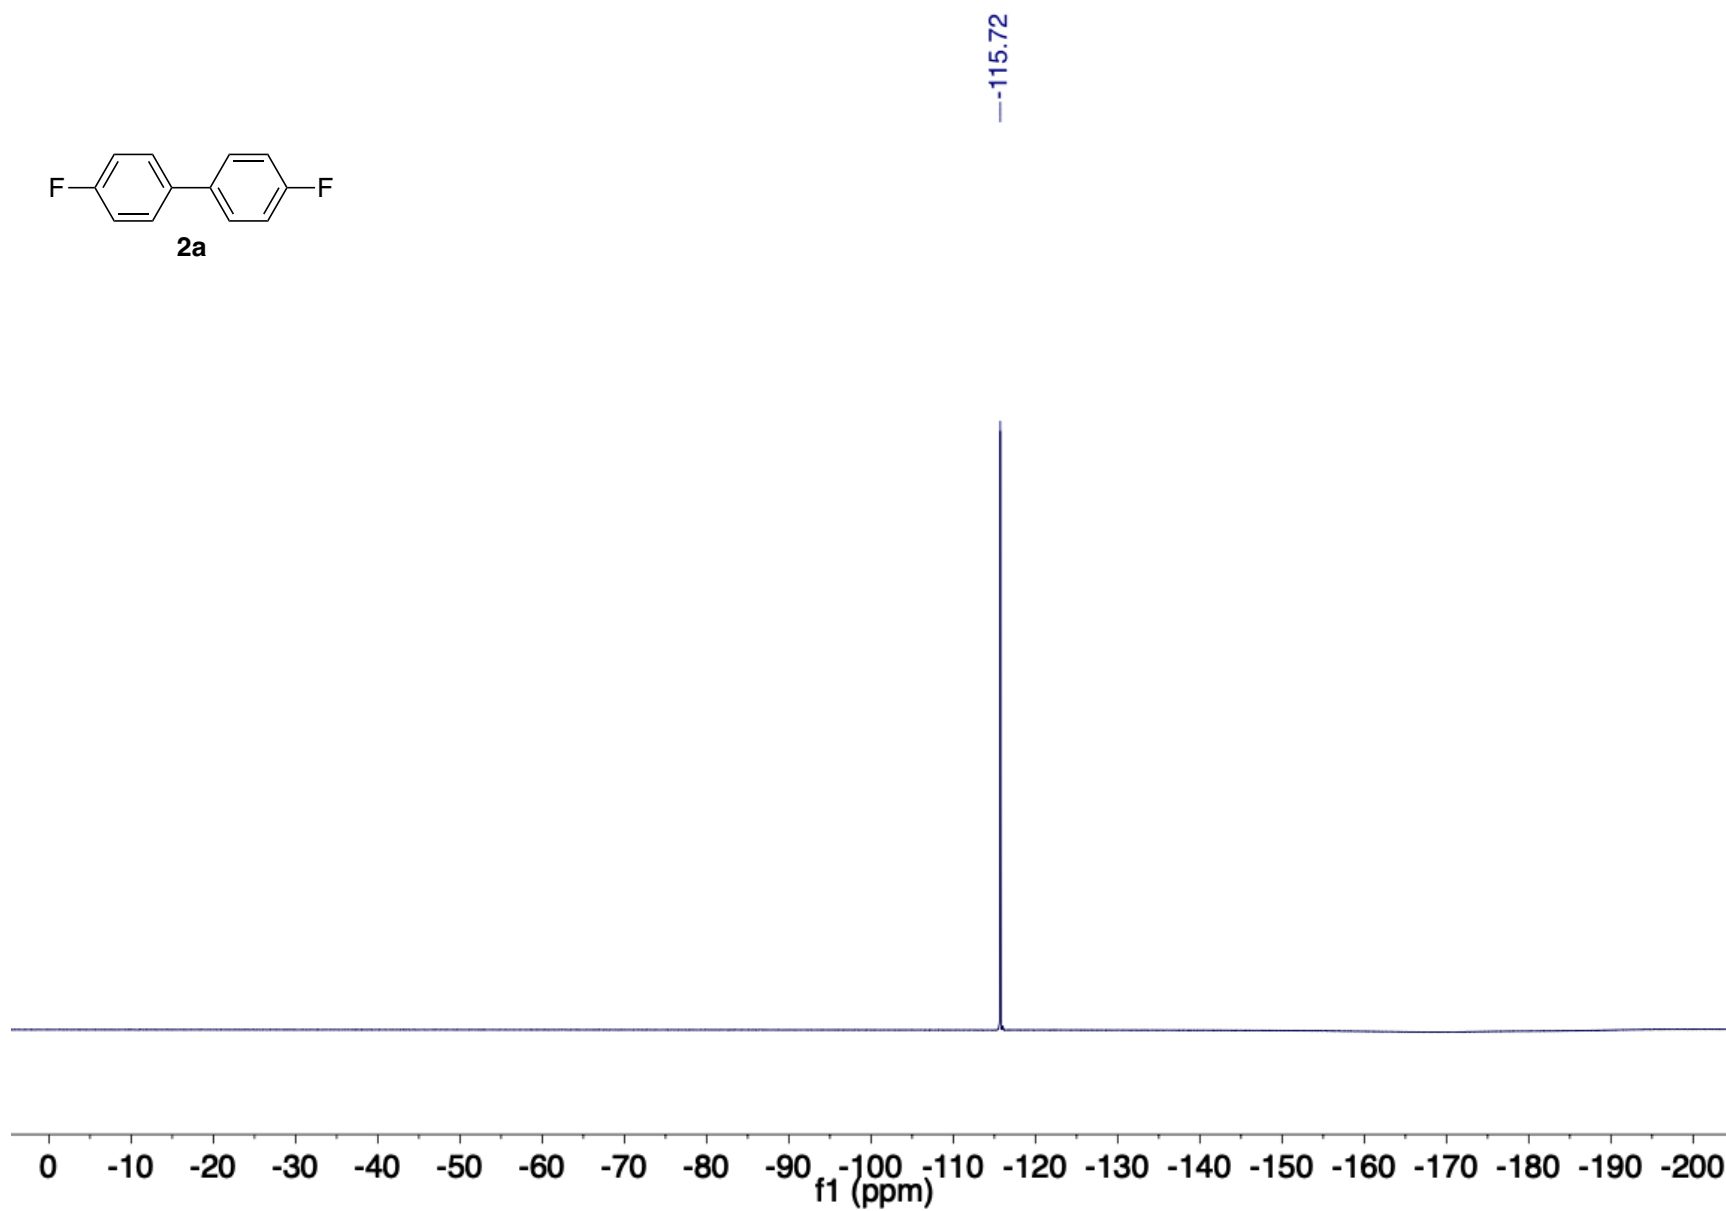

7.42  
7.41  
7.41  
7.40  
7.39  
7.35  
7.35  
7.34  
7.34  
7.34  
7.28  
7.27  
7.27  
7.26  
7.26  
7.25  
7.25  
7.08  
7.08  
7.08  
7.07  
7.07  
7.06  
7.06  
7.06  
7.05  
7.05  
7.05

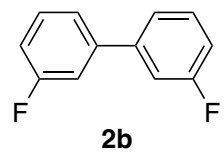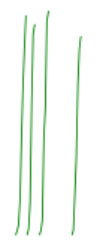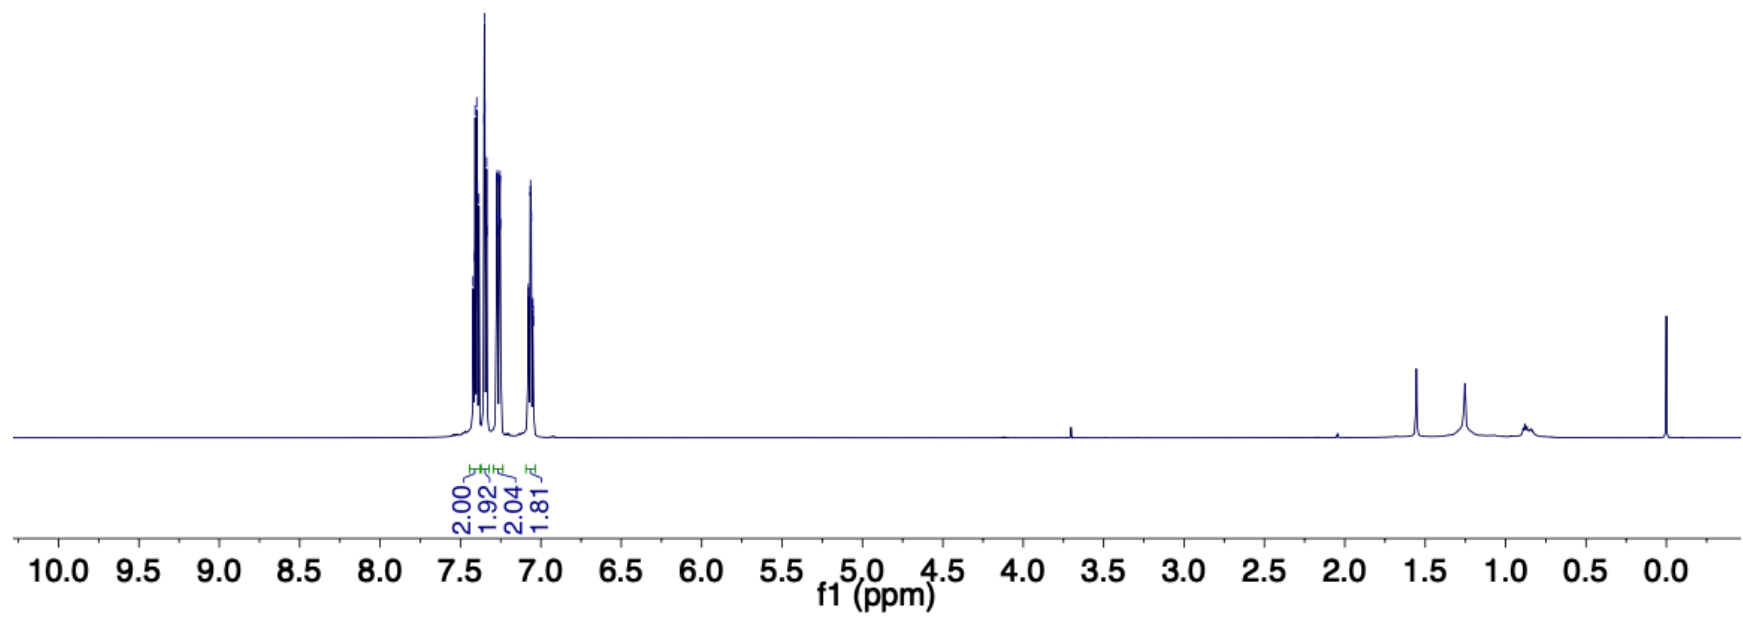

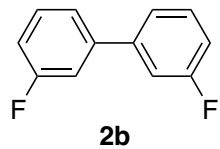

163.25  
161.62

136.42  
136.40  
128.62  
128.57

115.79  
115.64

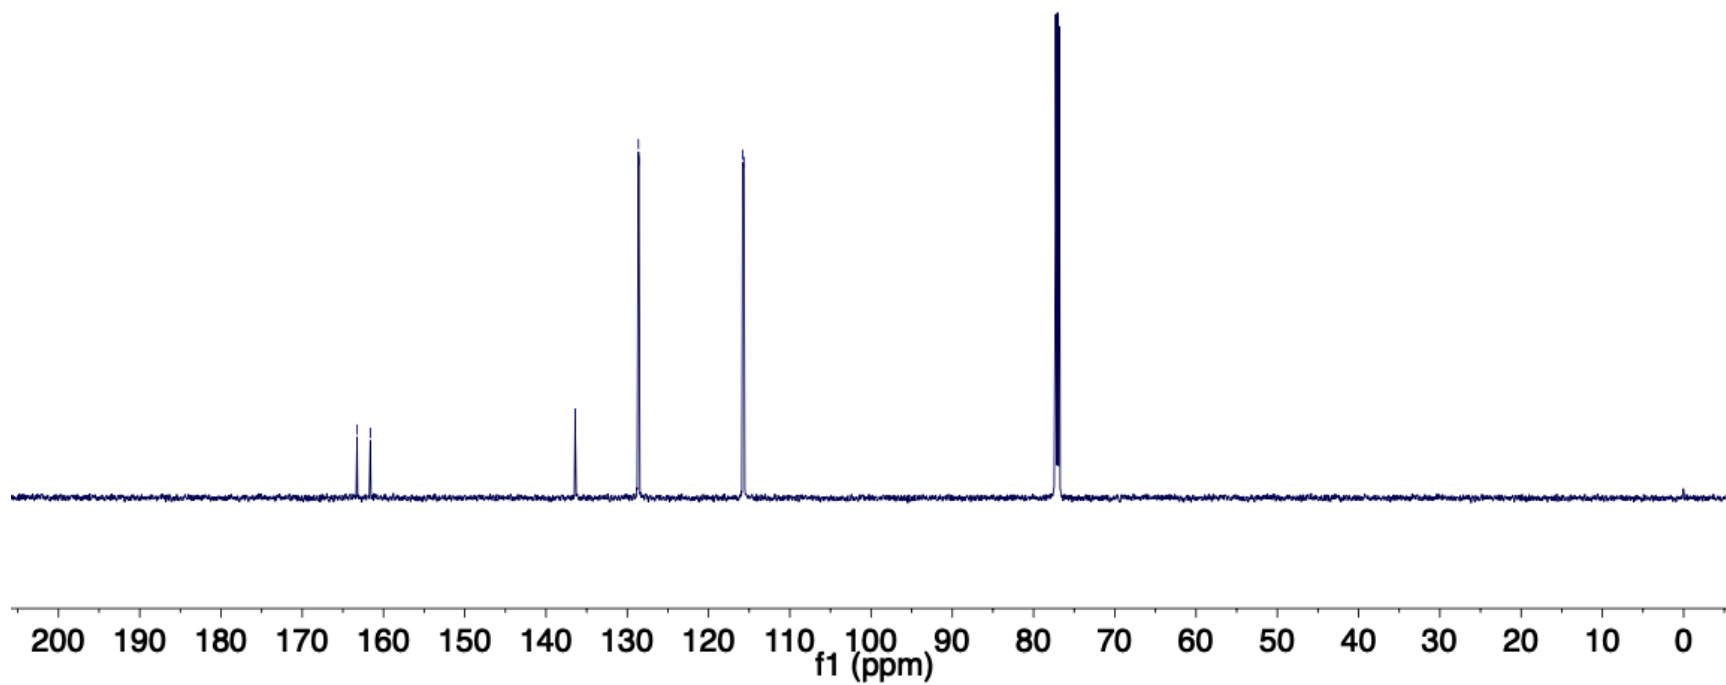

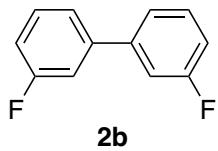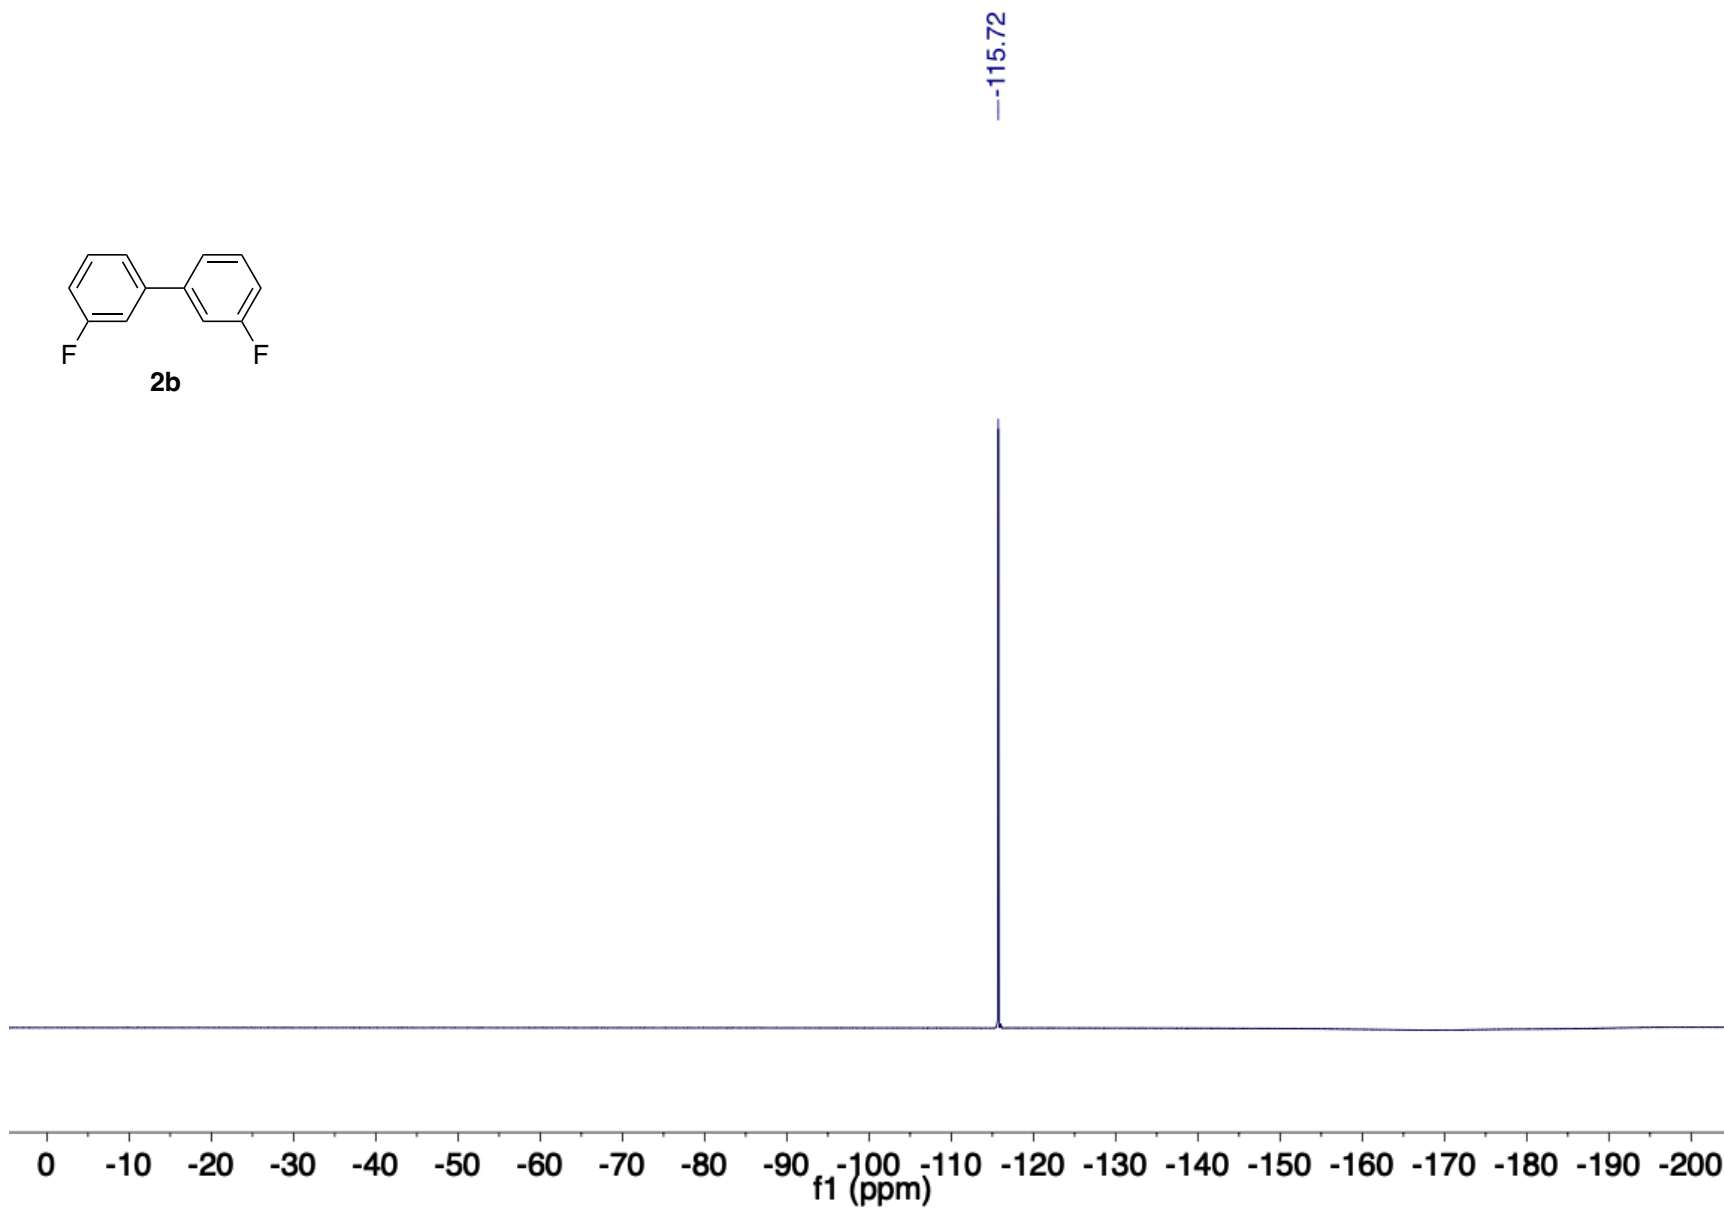

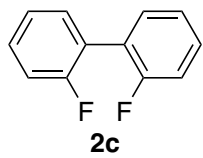

7.41  
7.40  
7.40  
7.39  
7.38  
7.38  
7.37  
7.37  
7.36  
7.36  
7.23  
7.23  
7.22  
7.22  
7.21  
7.21  
7.18  
7.18  
7.18  
7.17  
7.17  
7.17  
7.17  
7.15

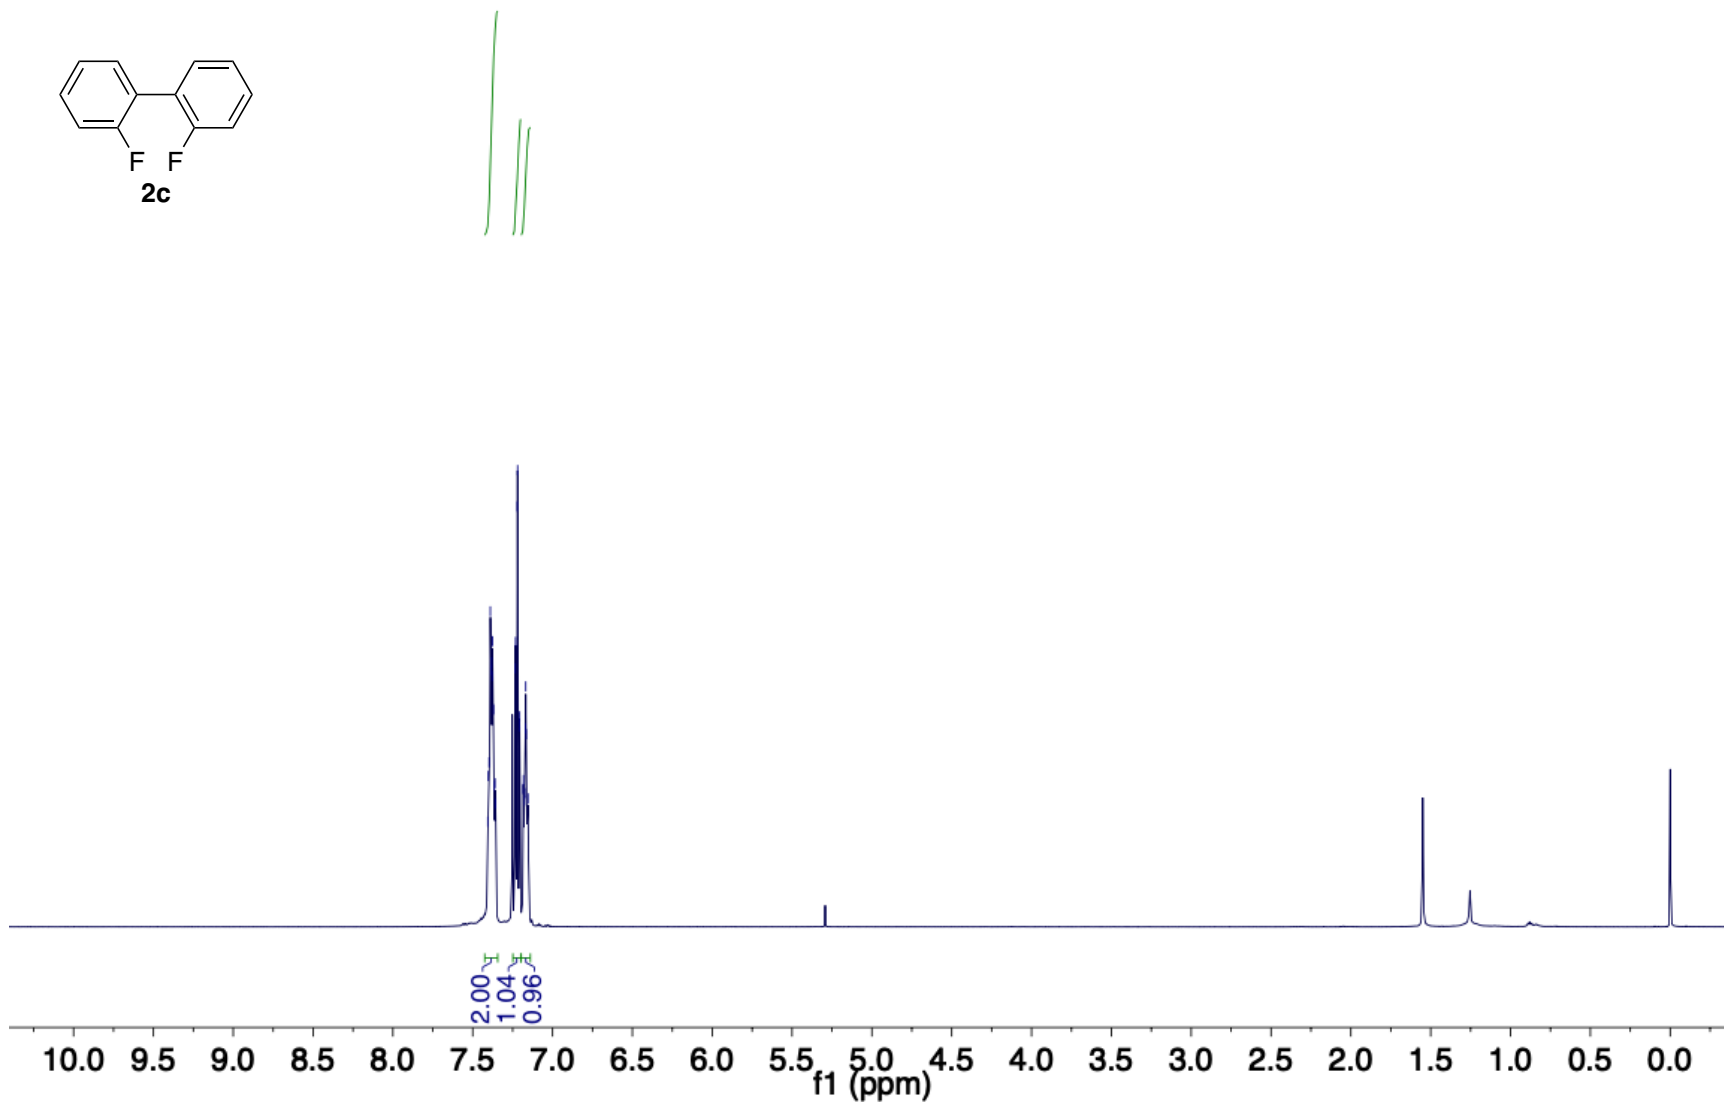

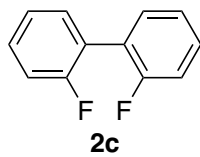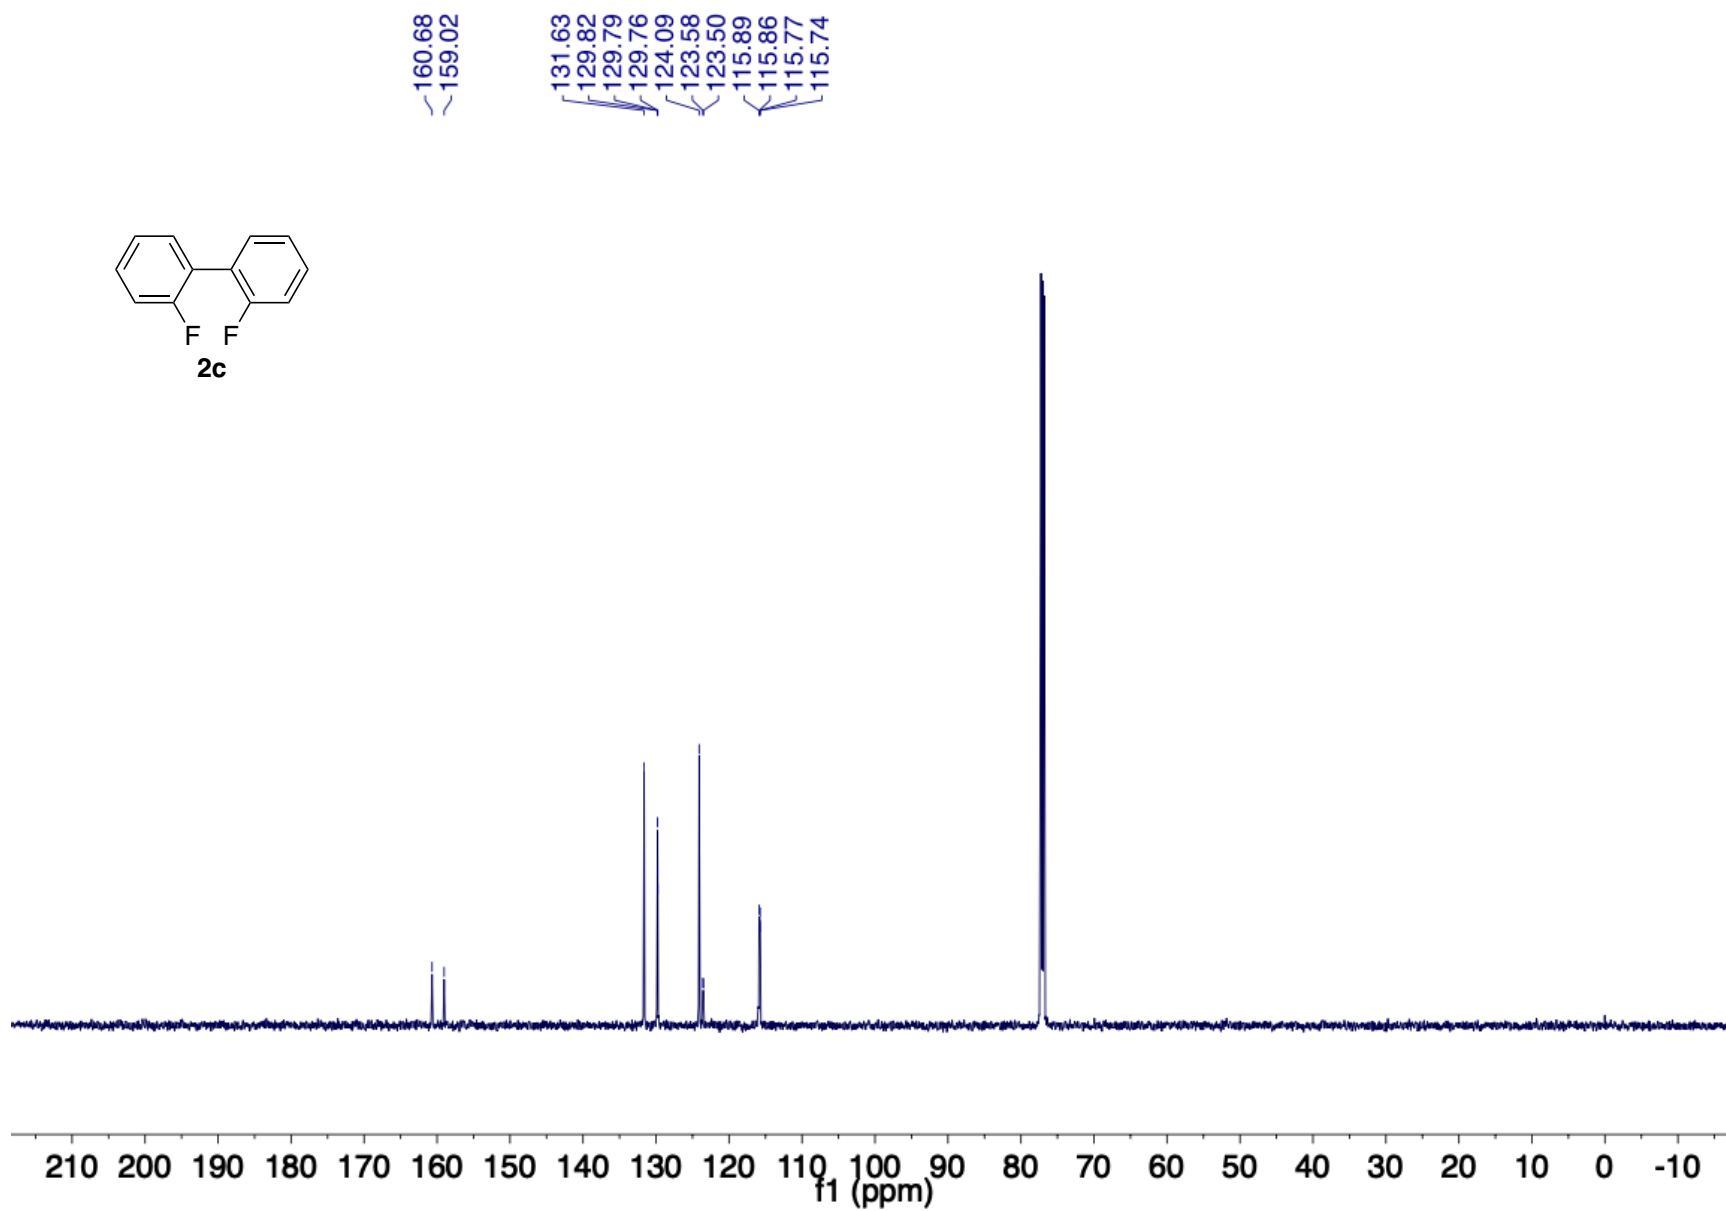

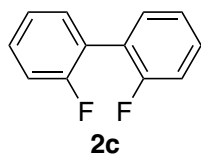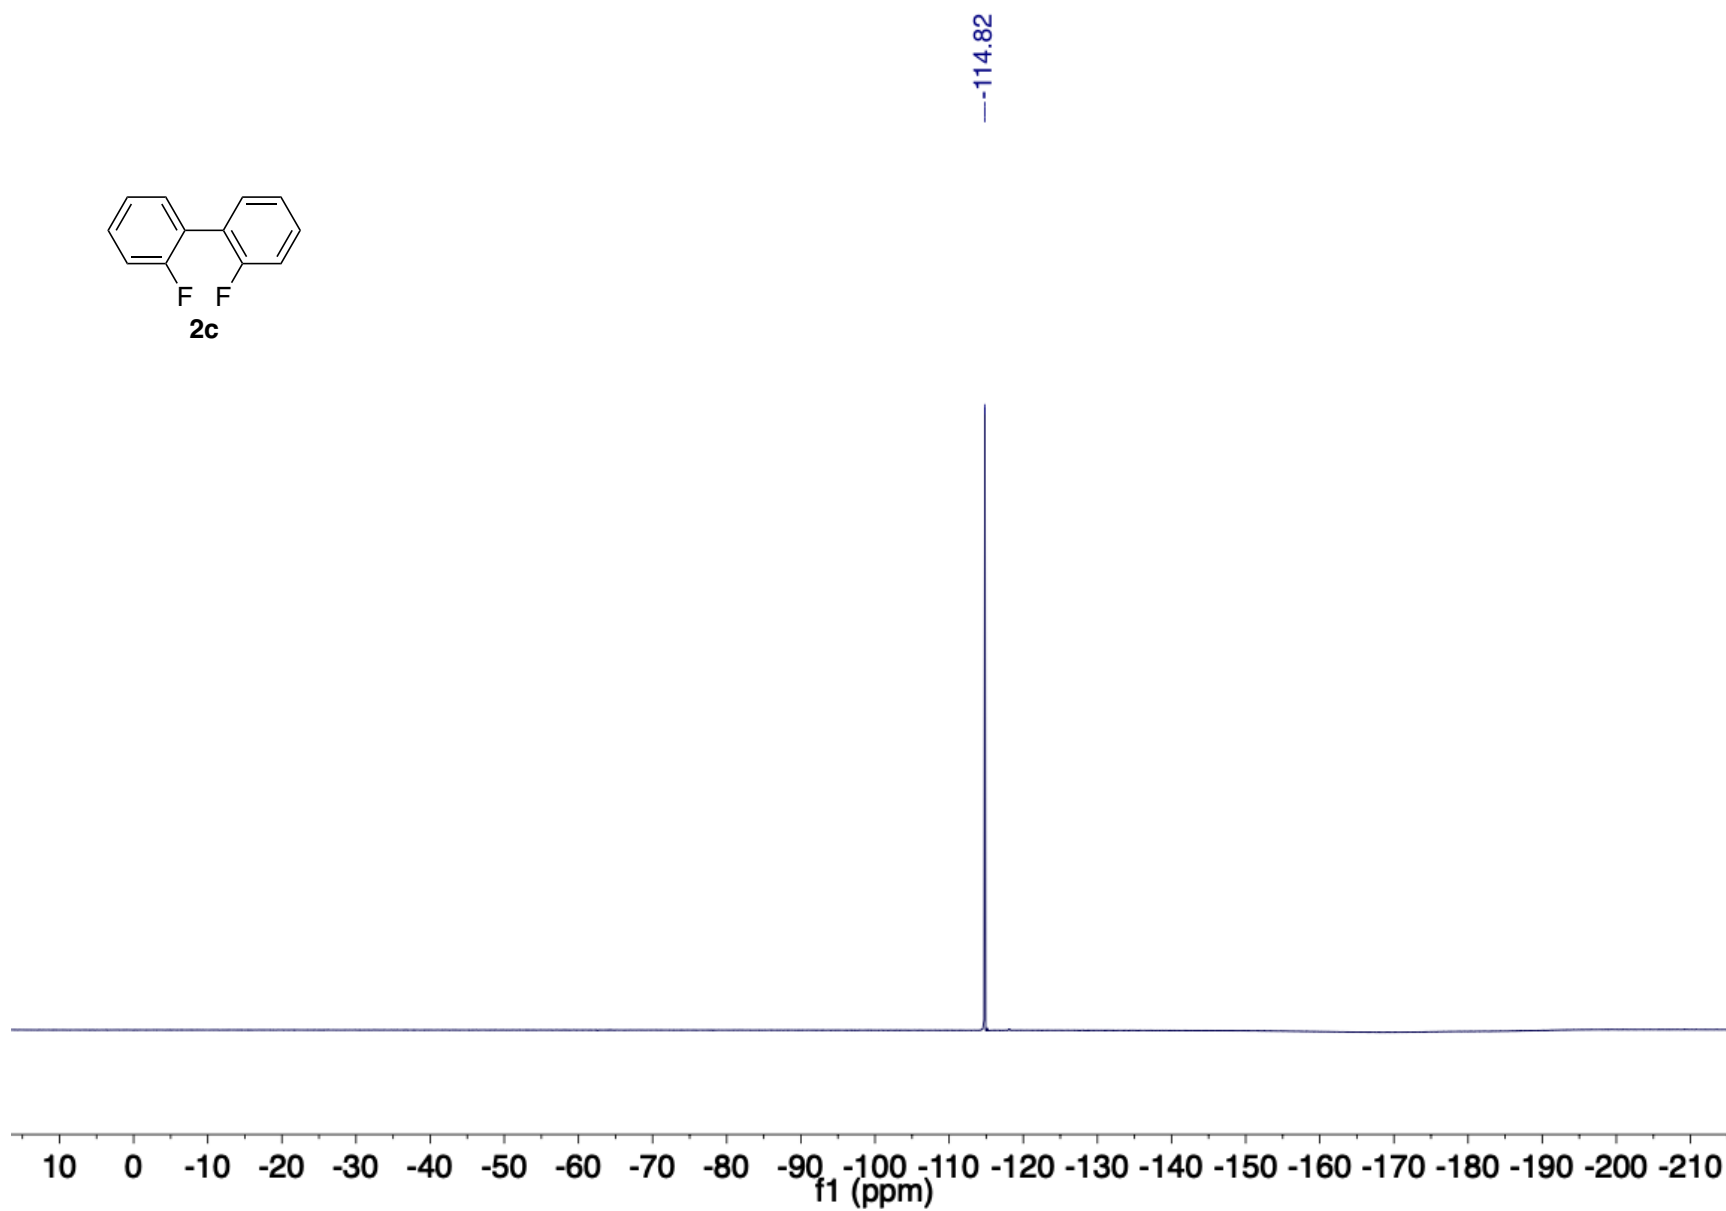

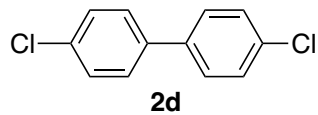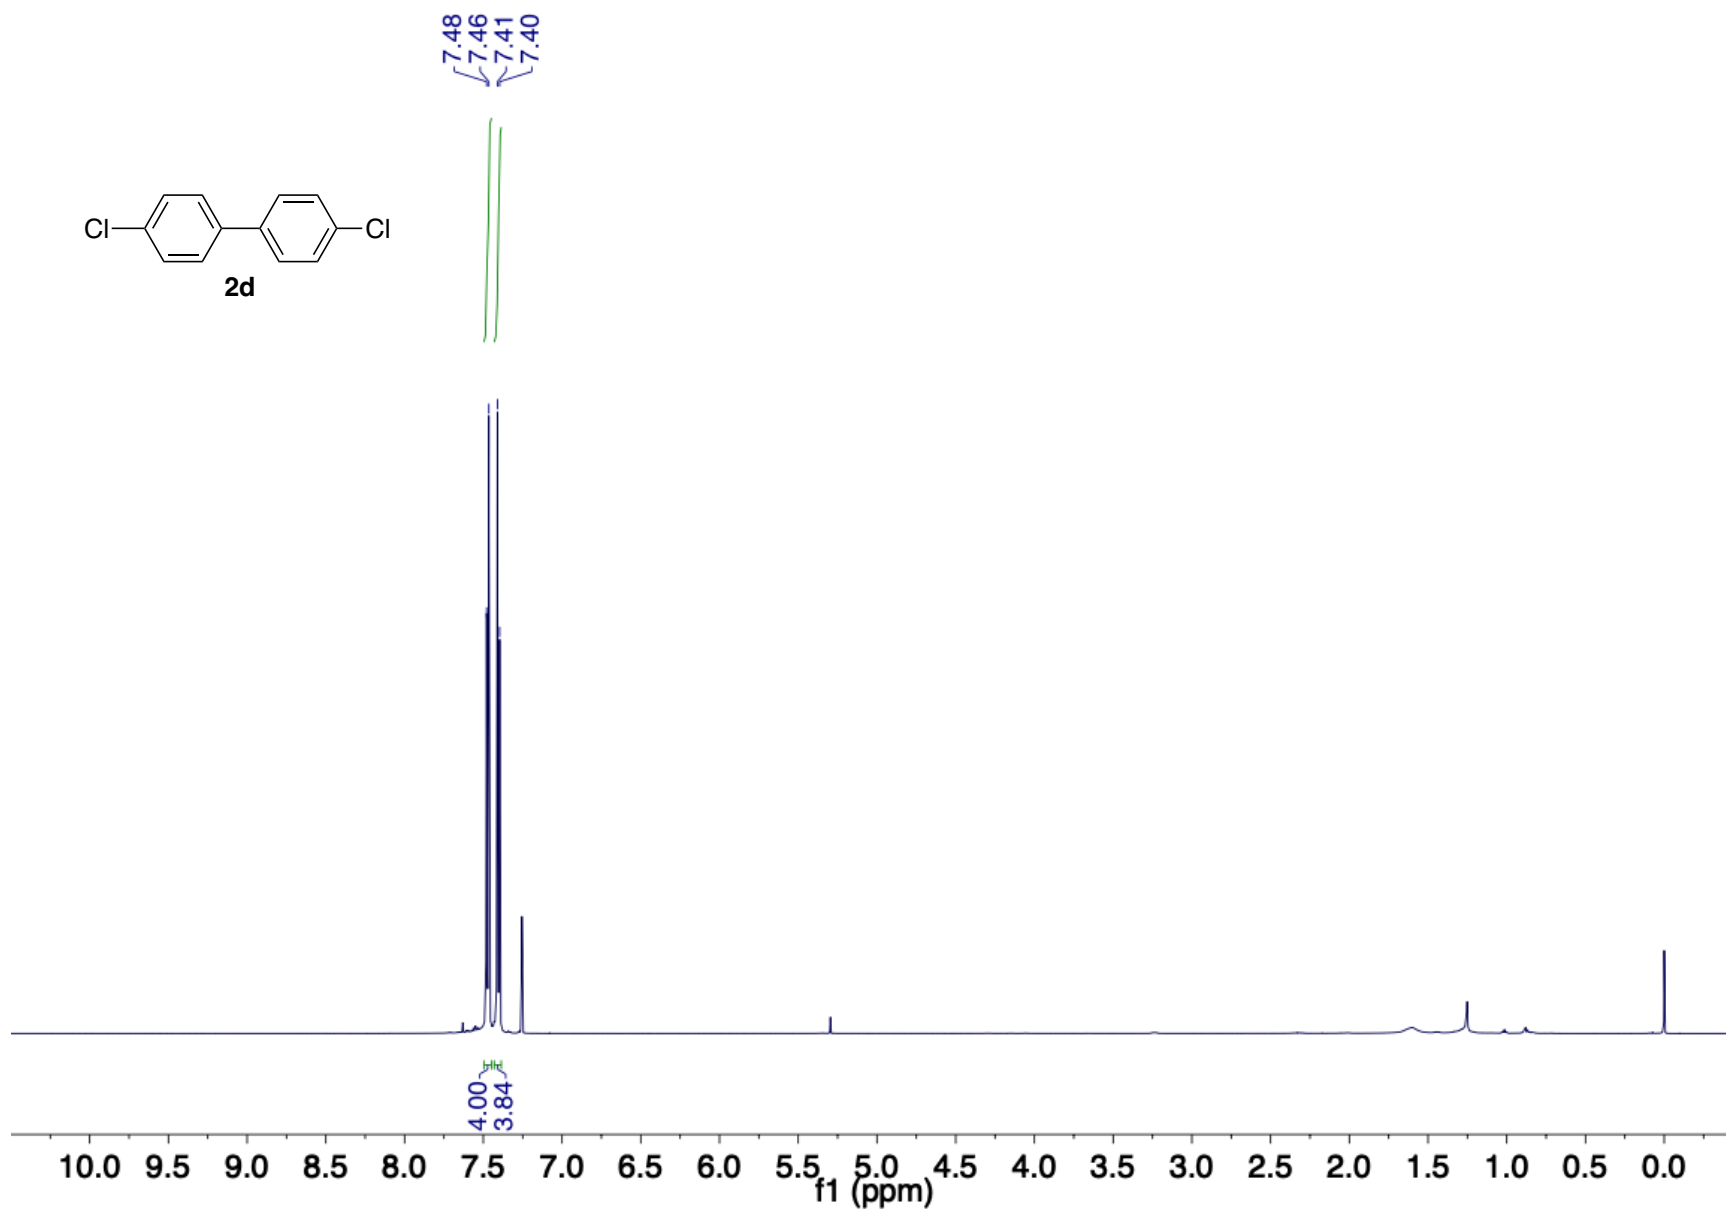



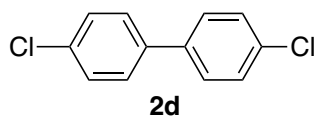

138.44  
133.75  
129.07  
128.25

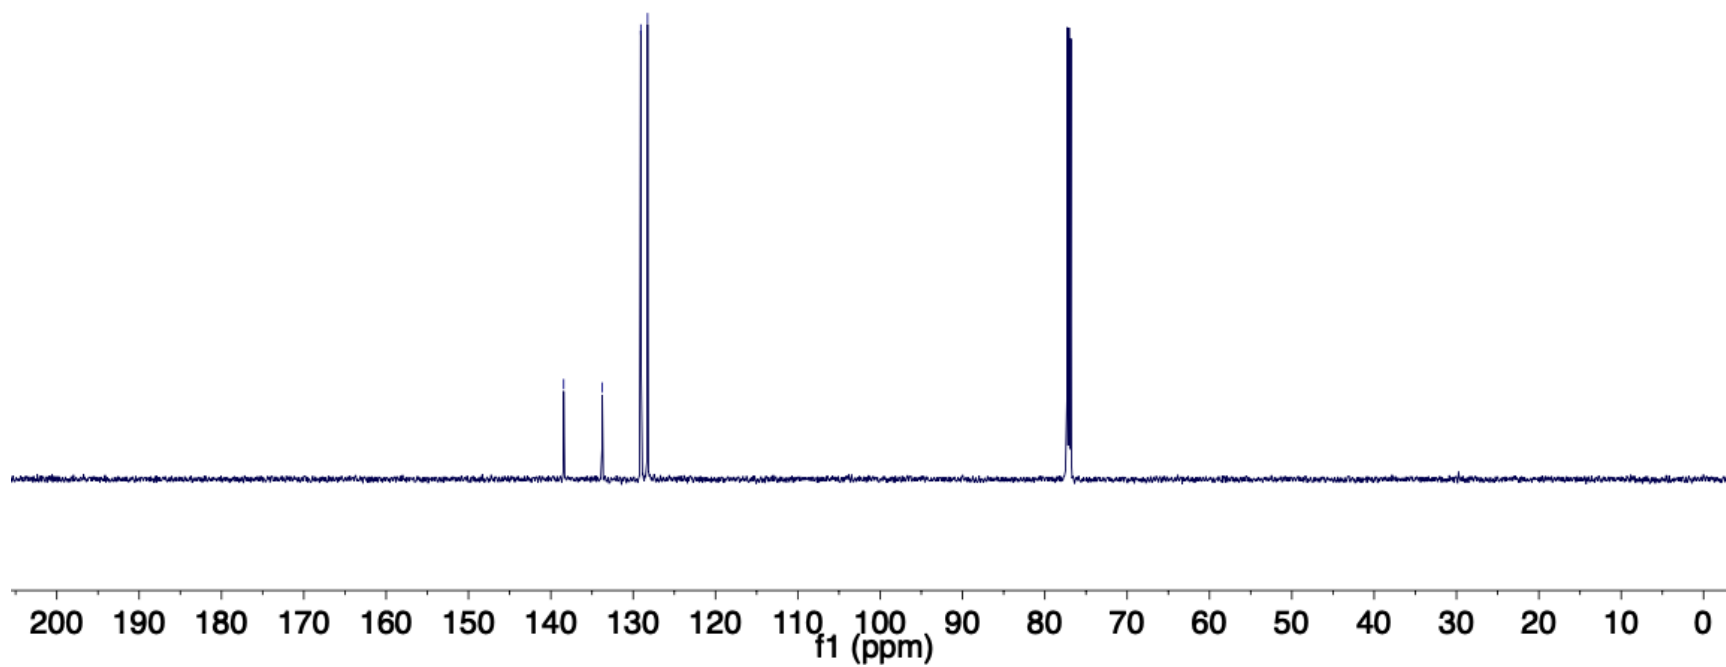

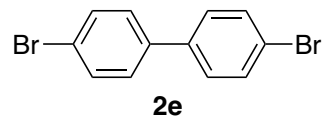

7.57  
7.56  
7.42  
7.41

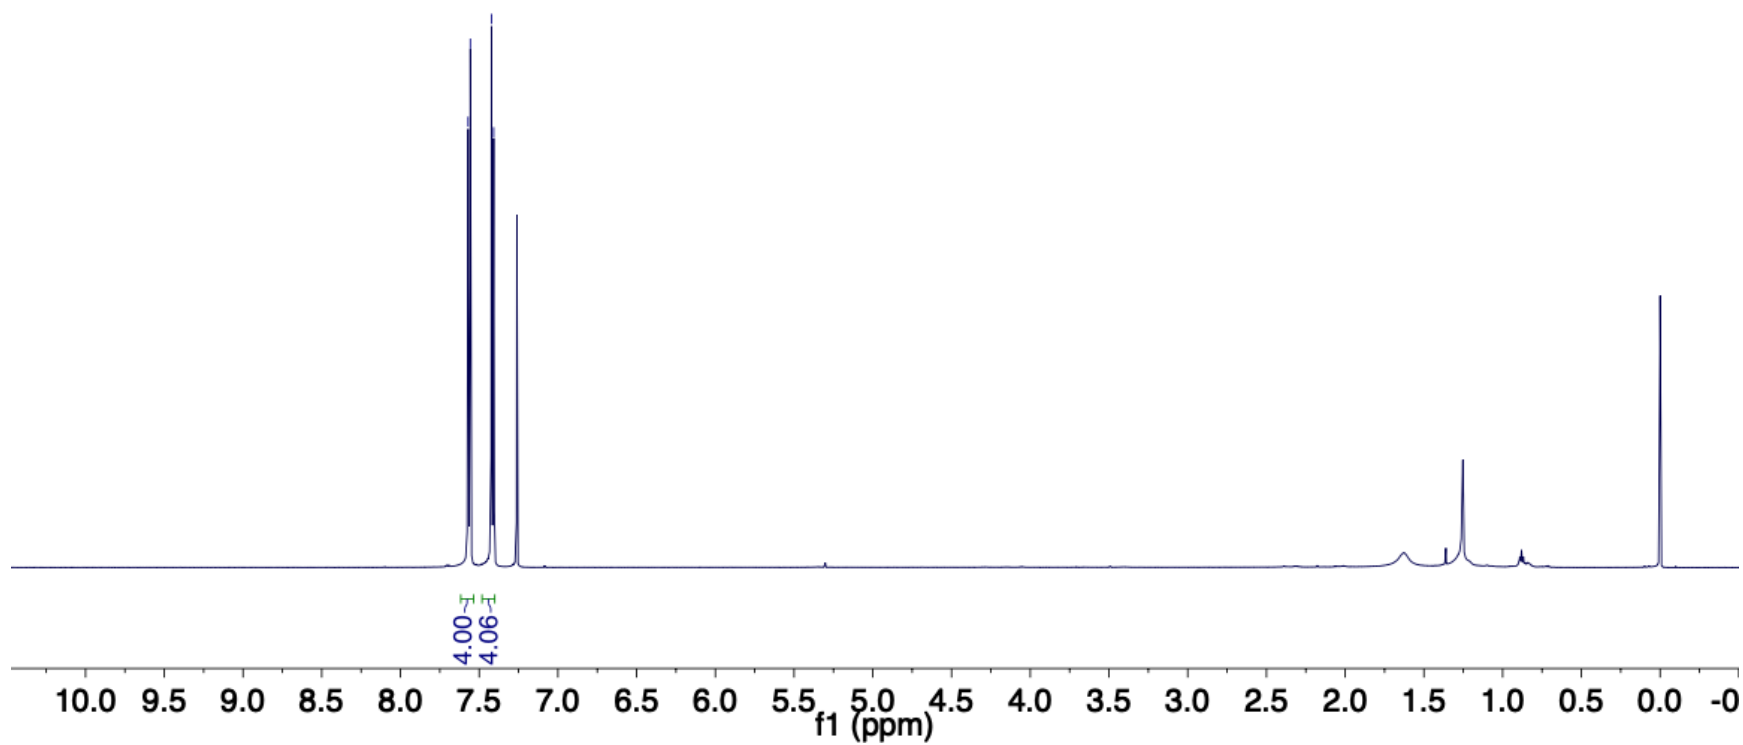

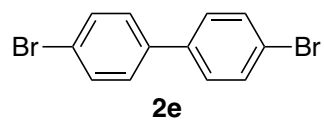

—138.93  
—132.05  
—128.54  
—121.97

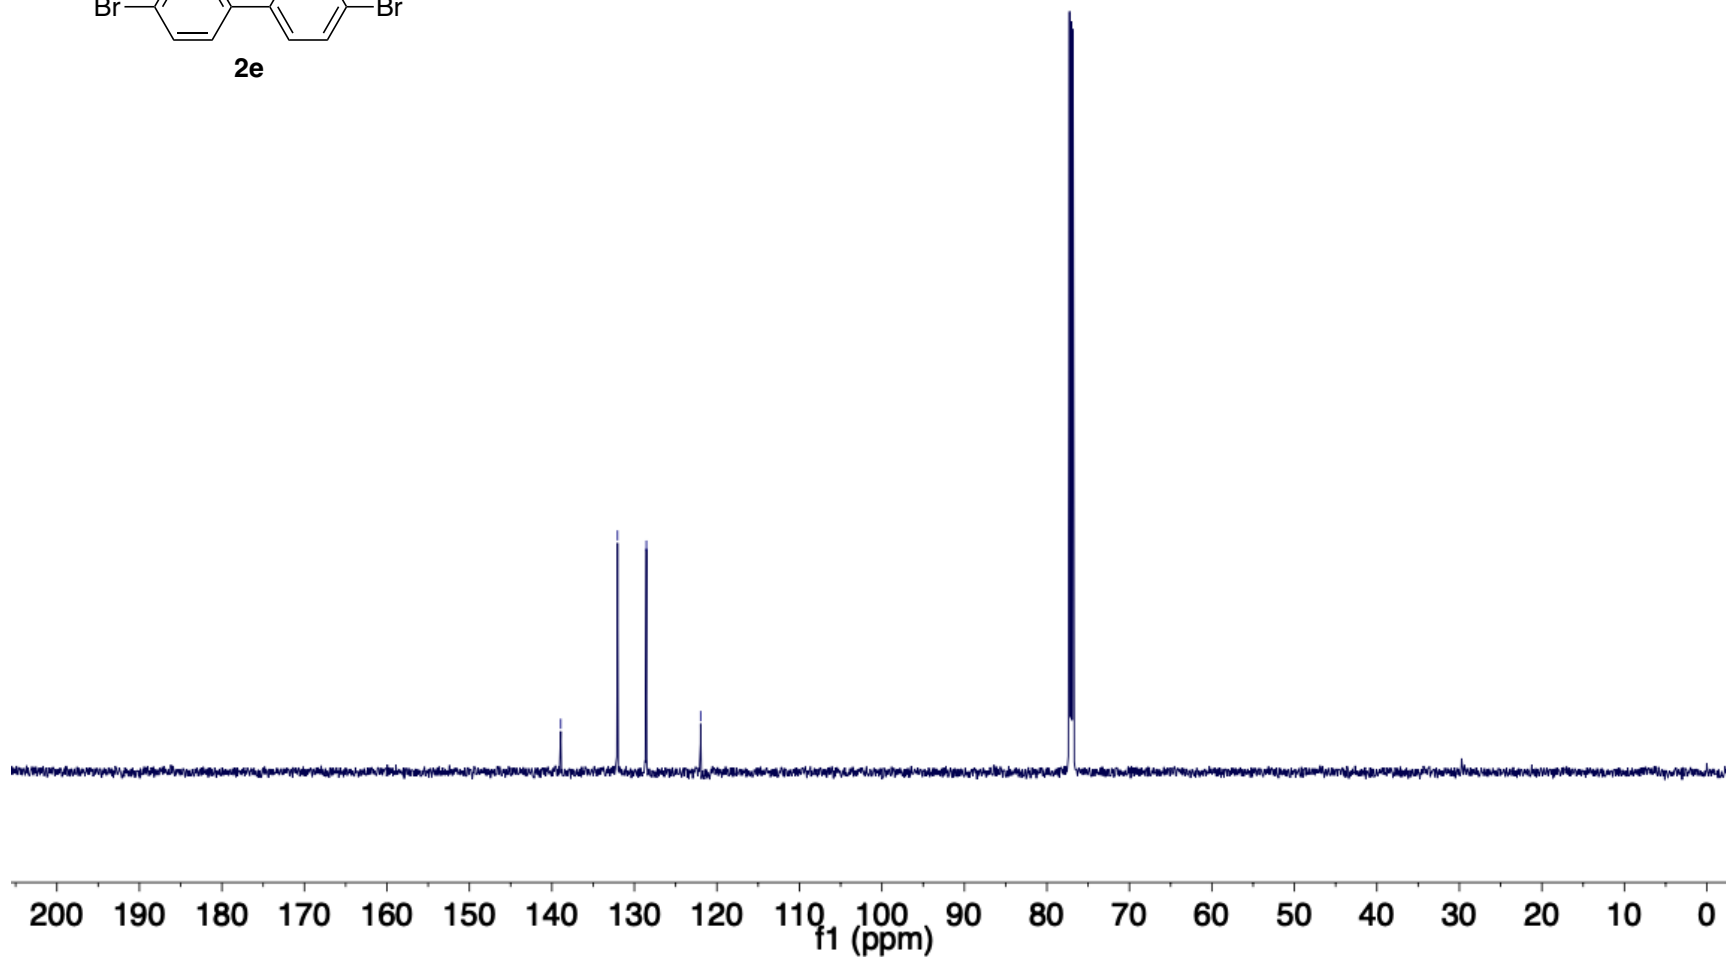

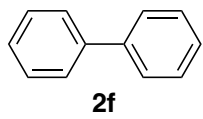

7.61  
7.60  
7.60  
7.59  
7.59  
7.46  
7.44  
7.44  
7.43  
7.43  
7.36  
7.35

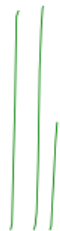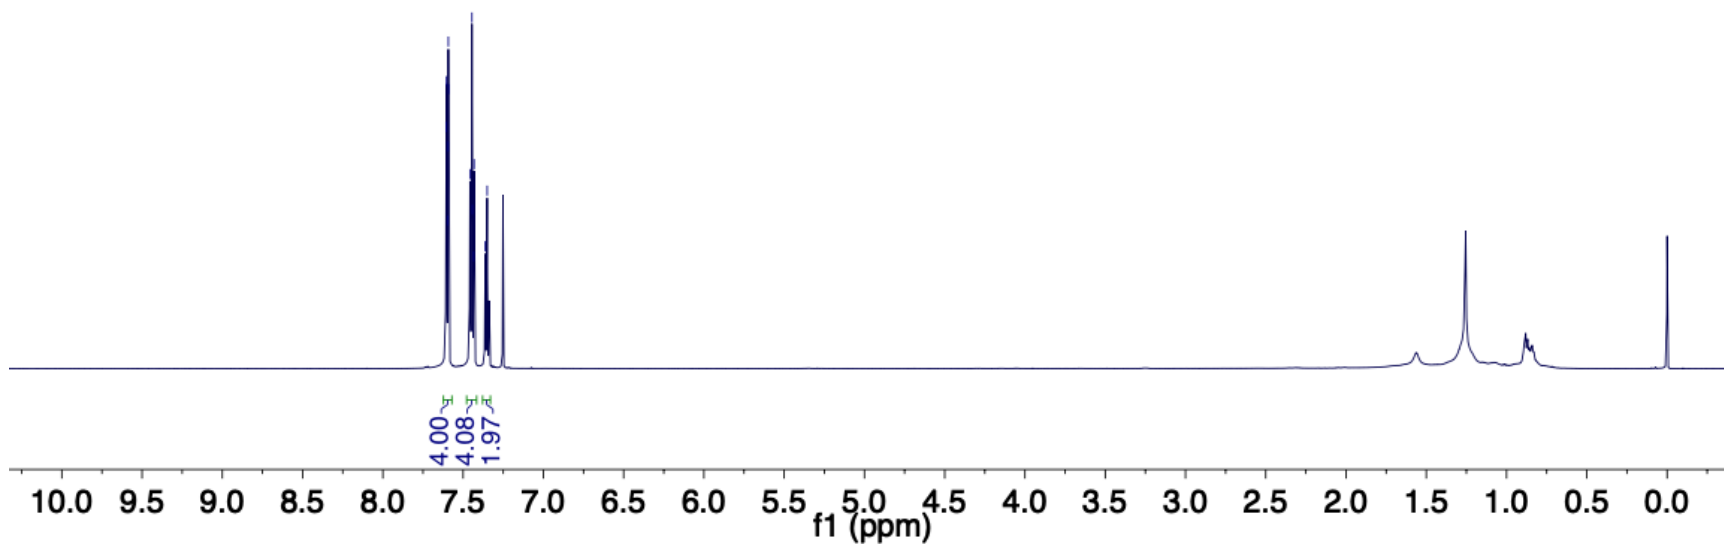

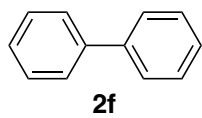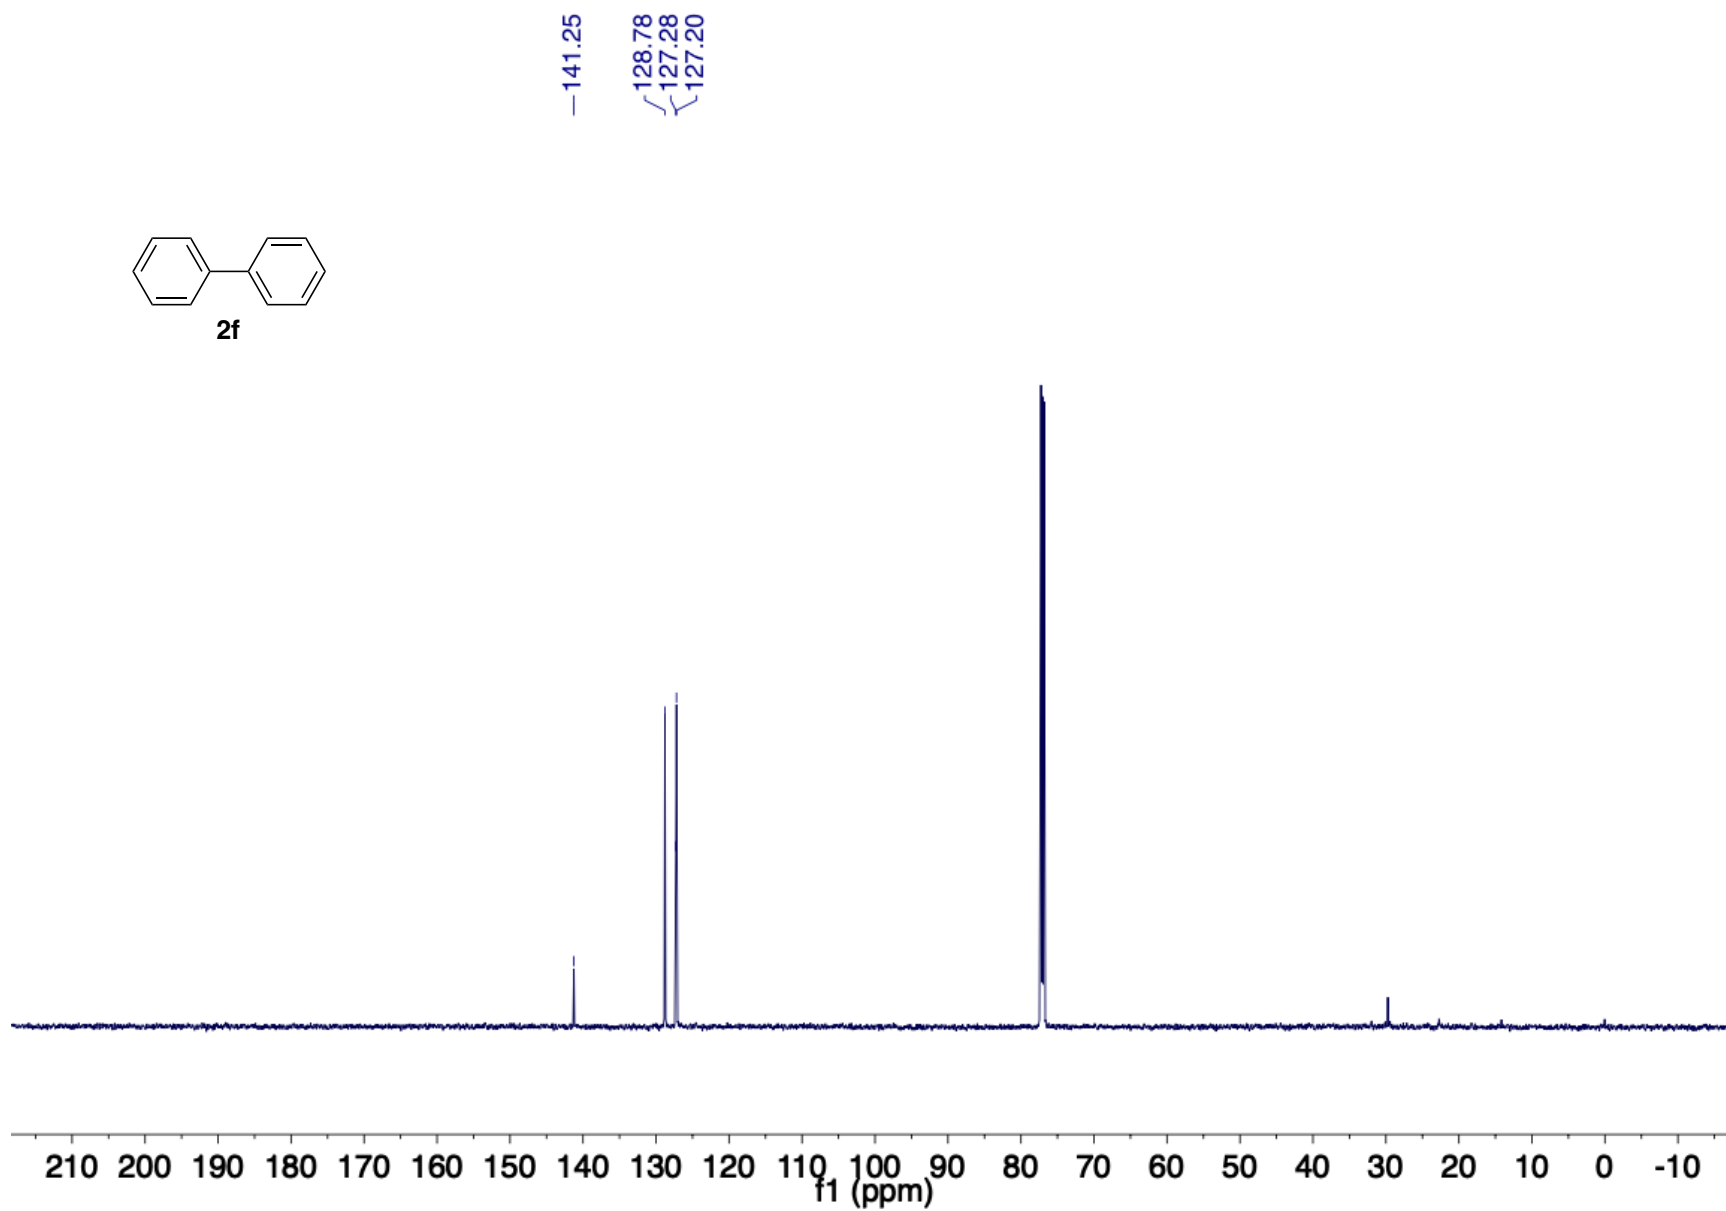

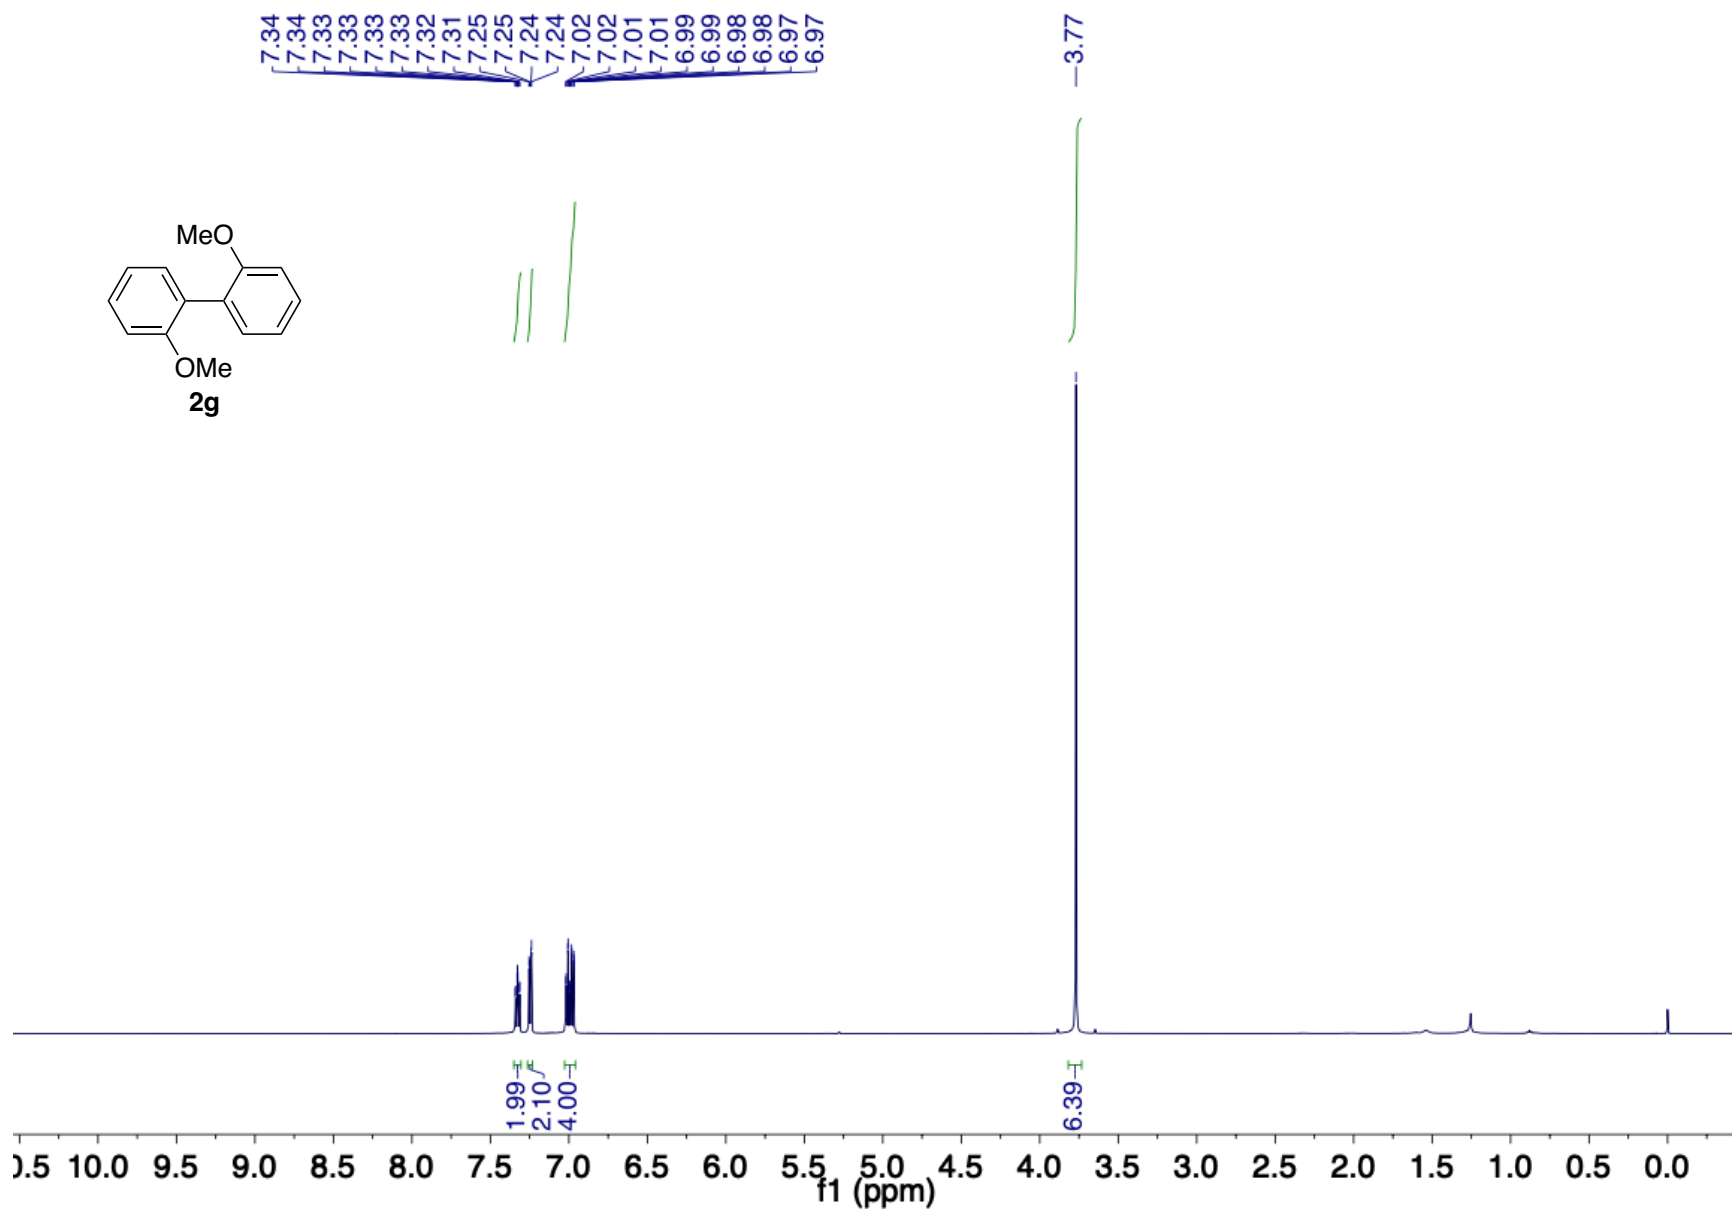

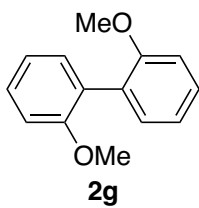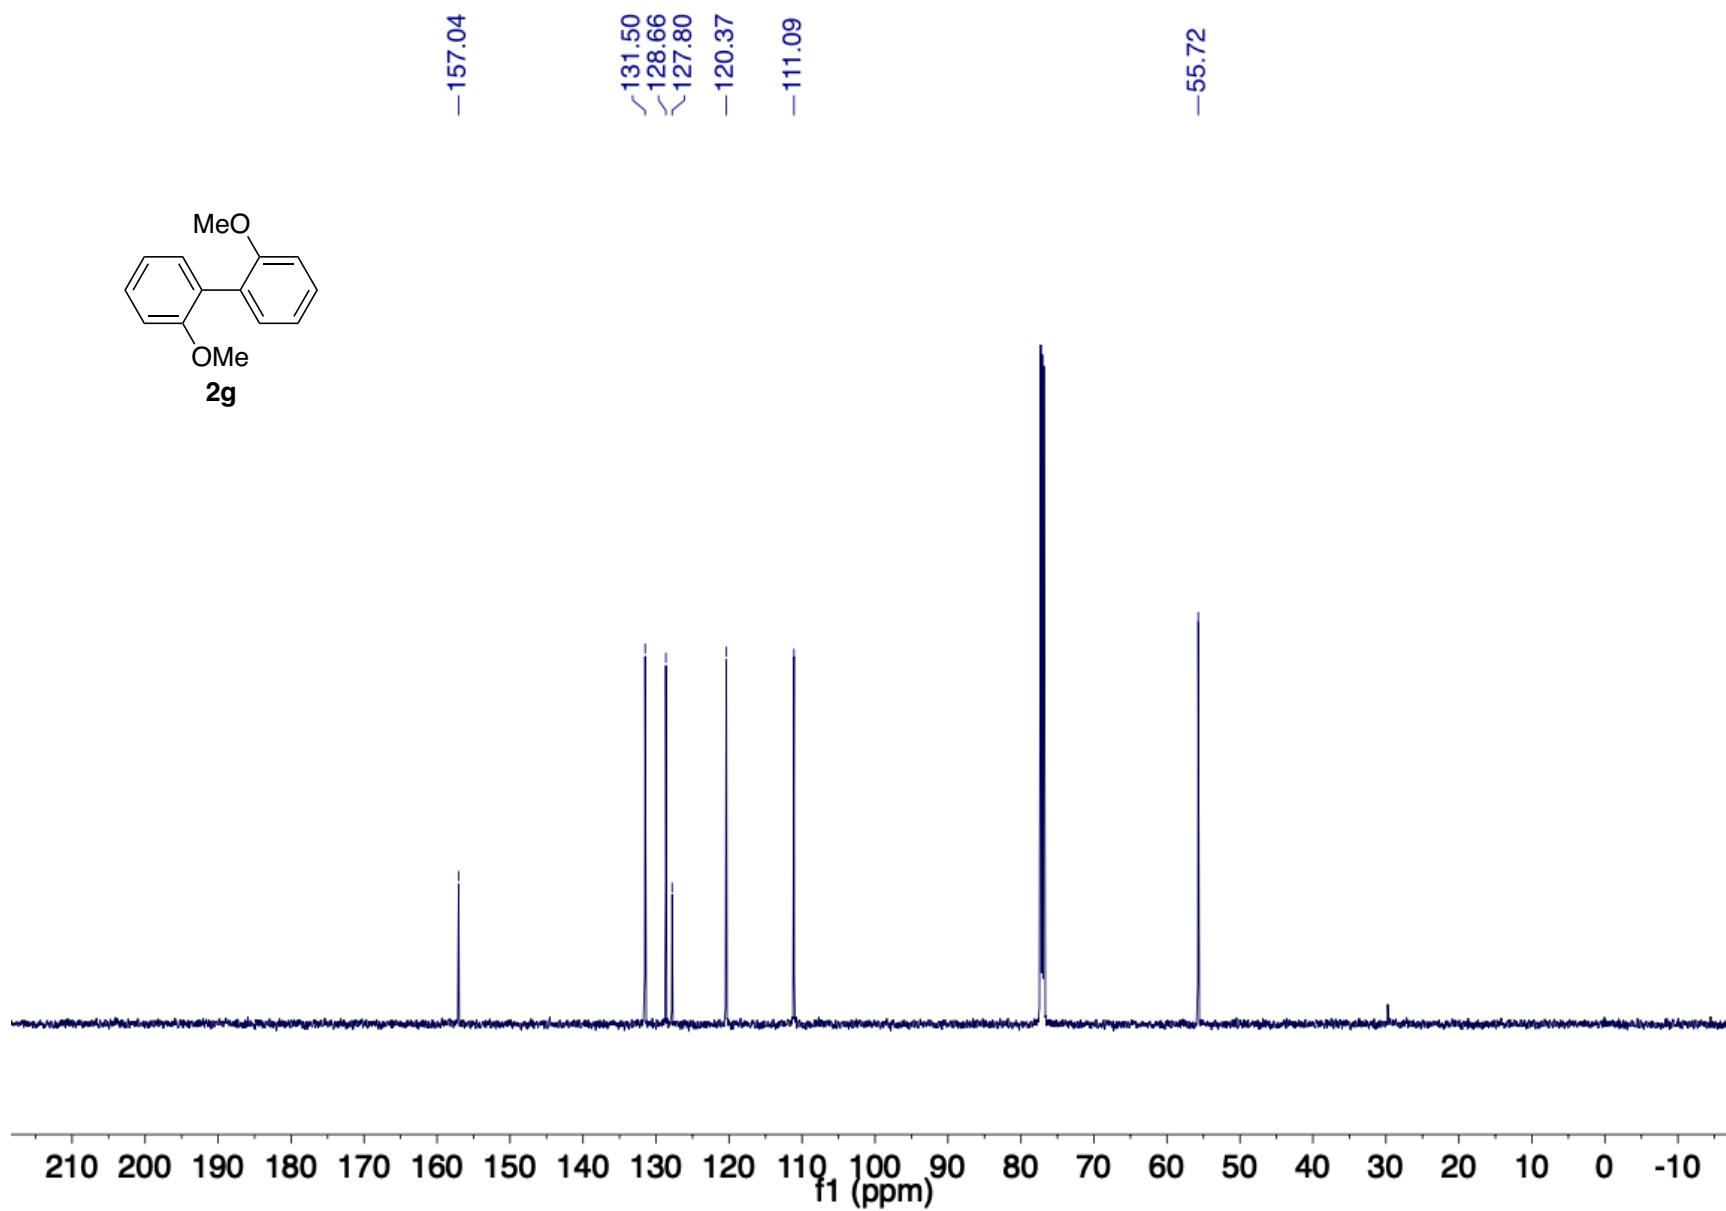

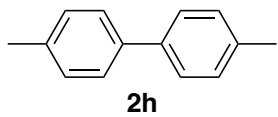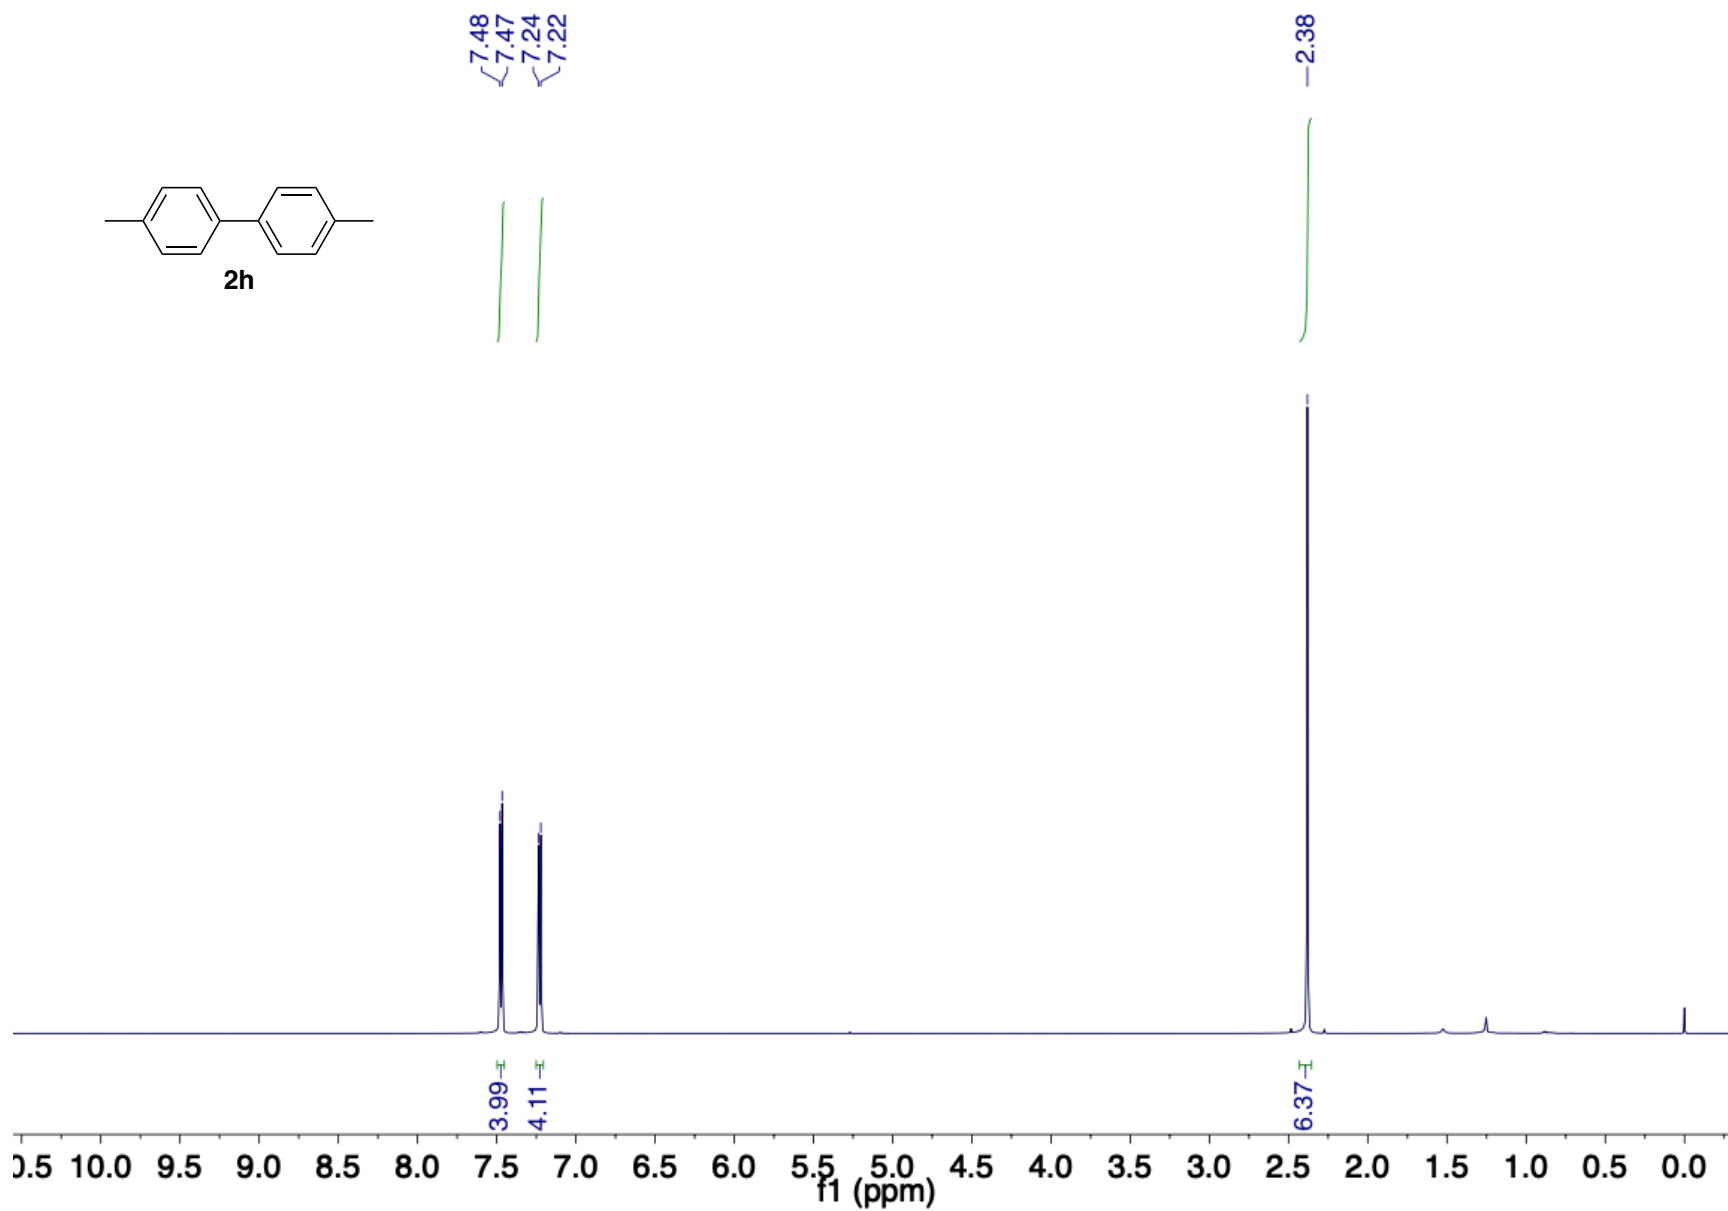



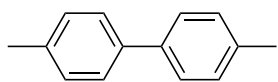

2h

138.32  
136.75  
129.49  
126.86

21.15

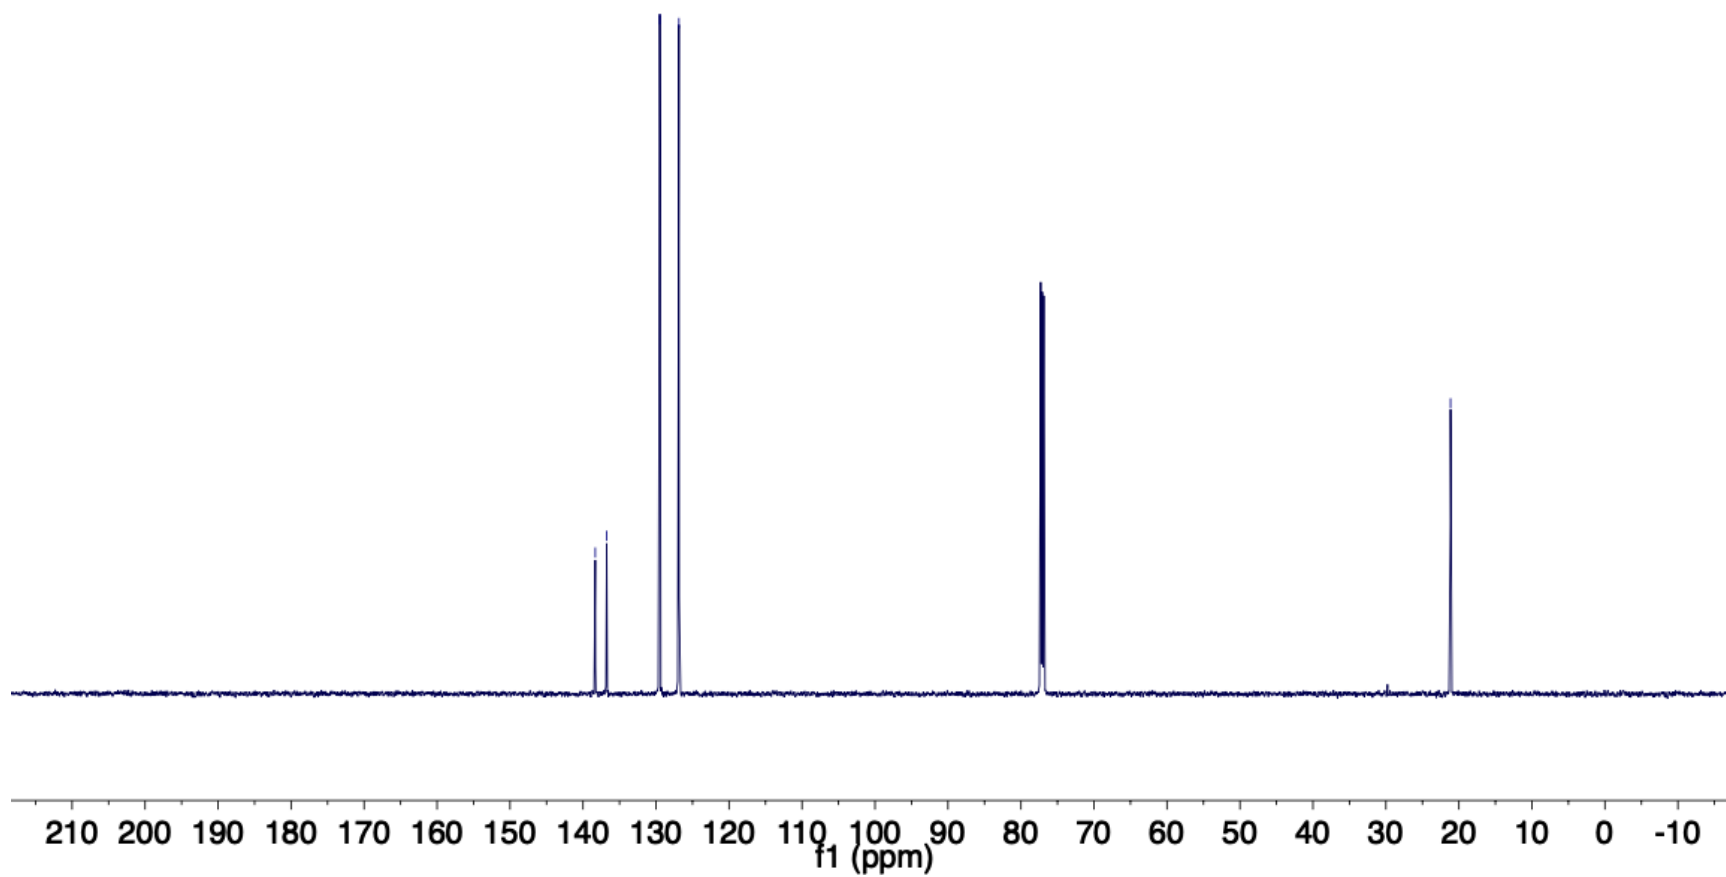

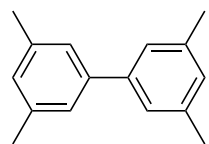

2i

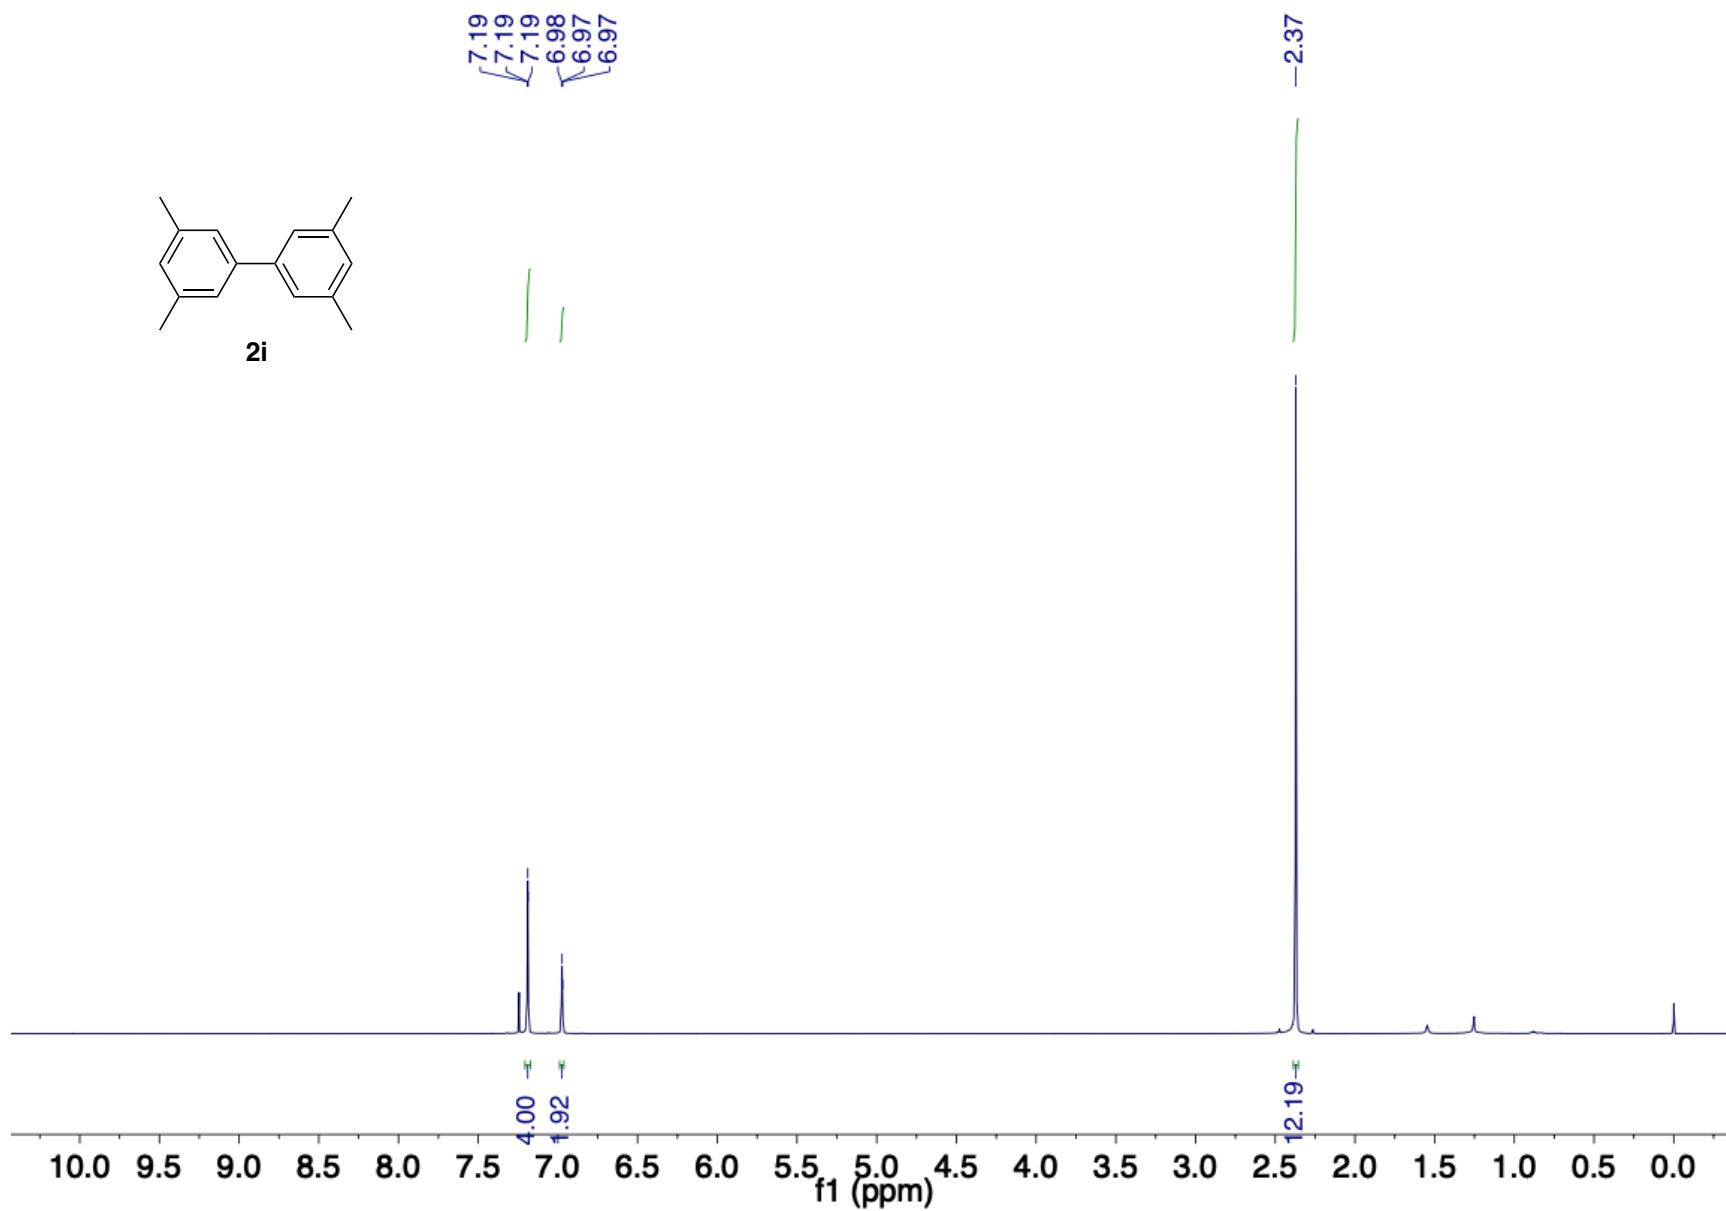

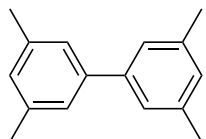

2i

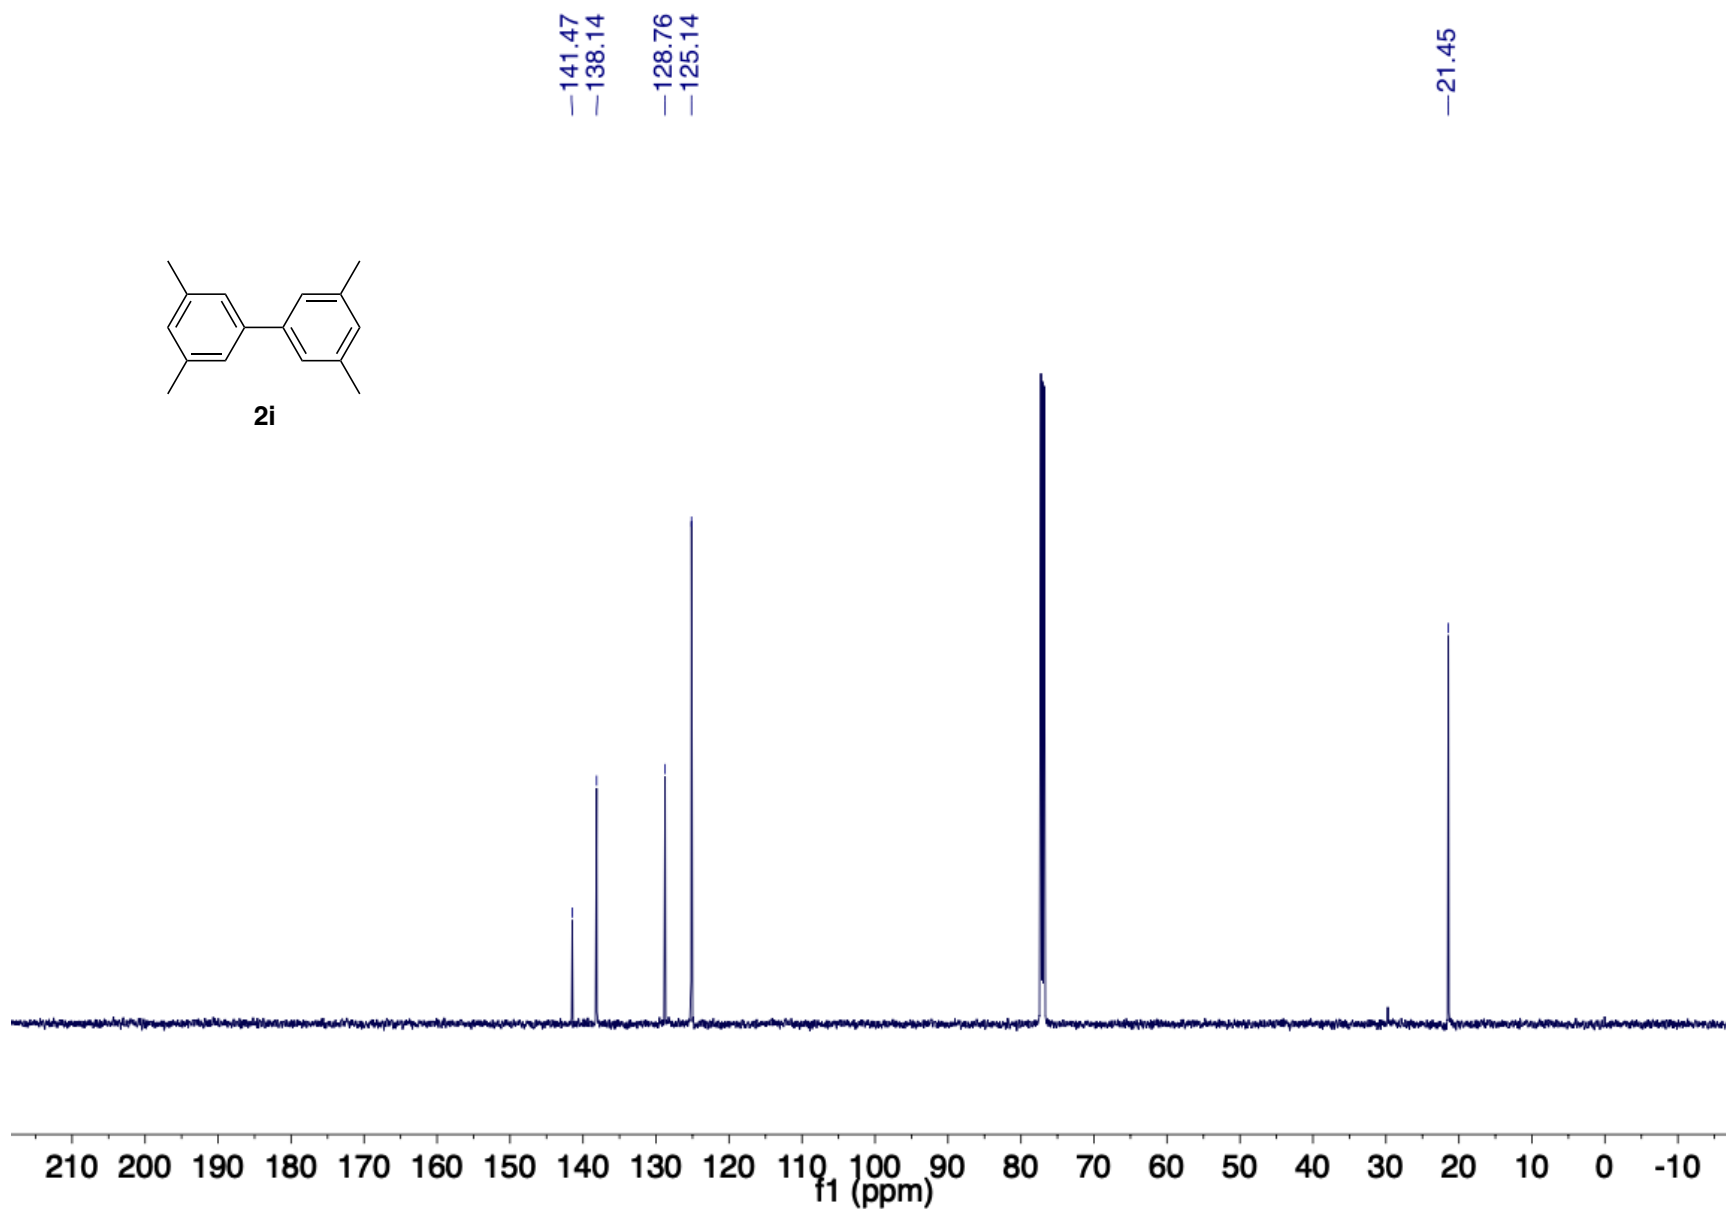

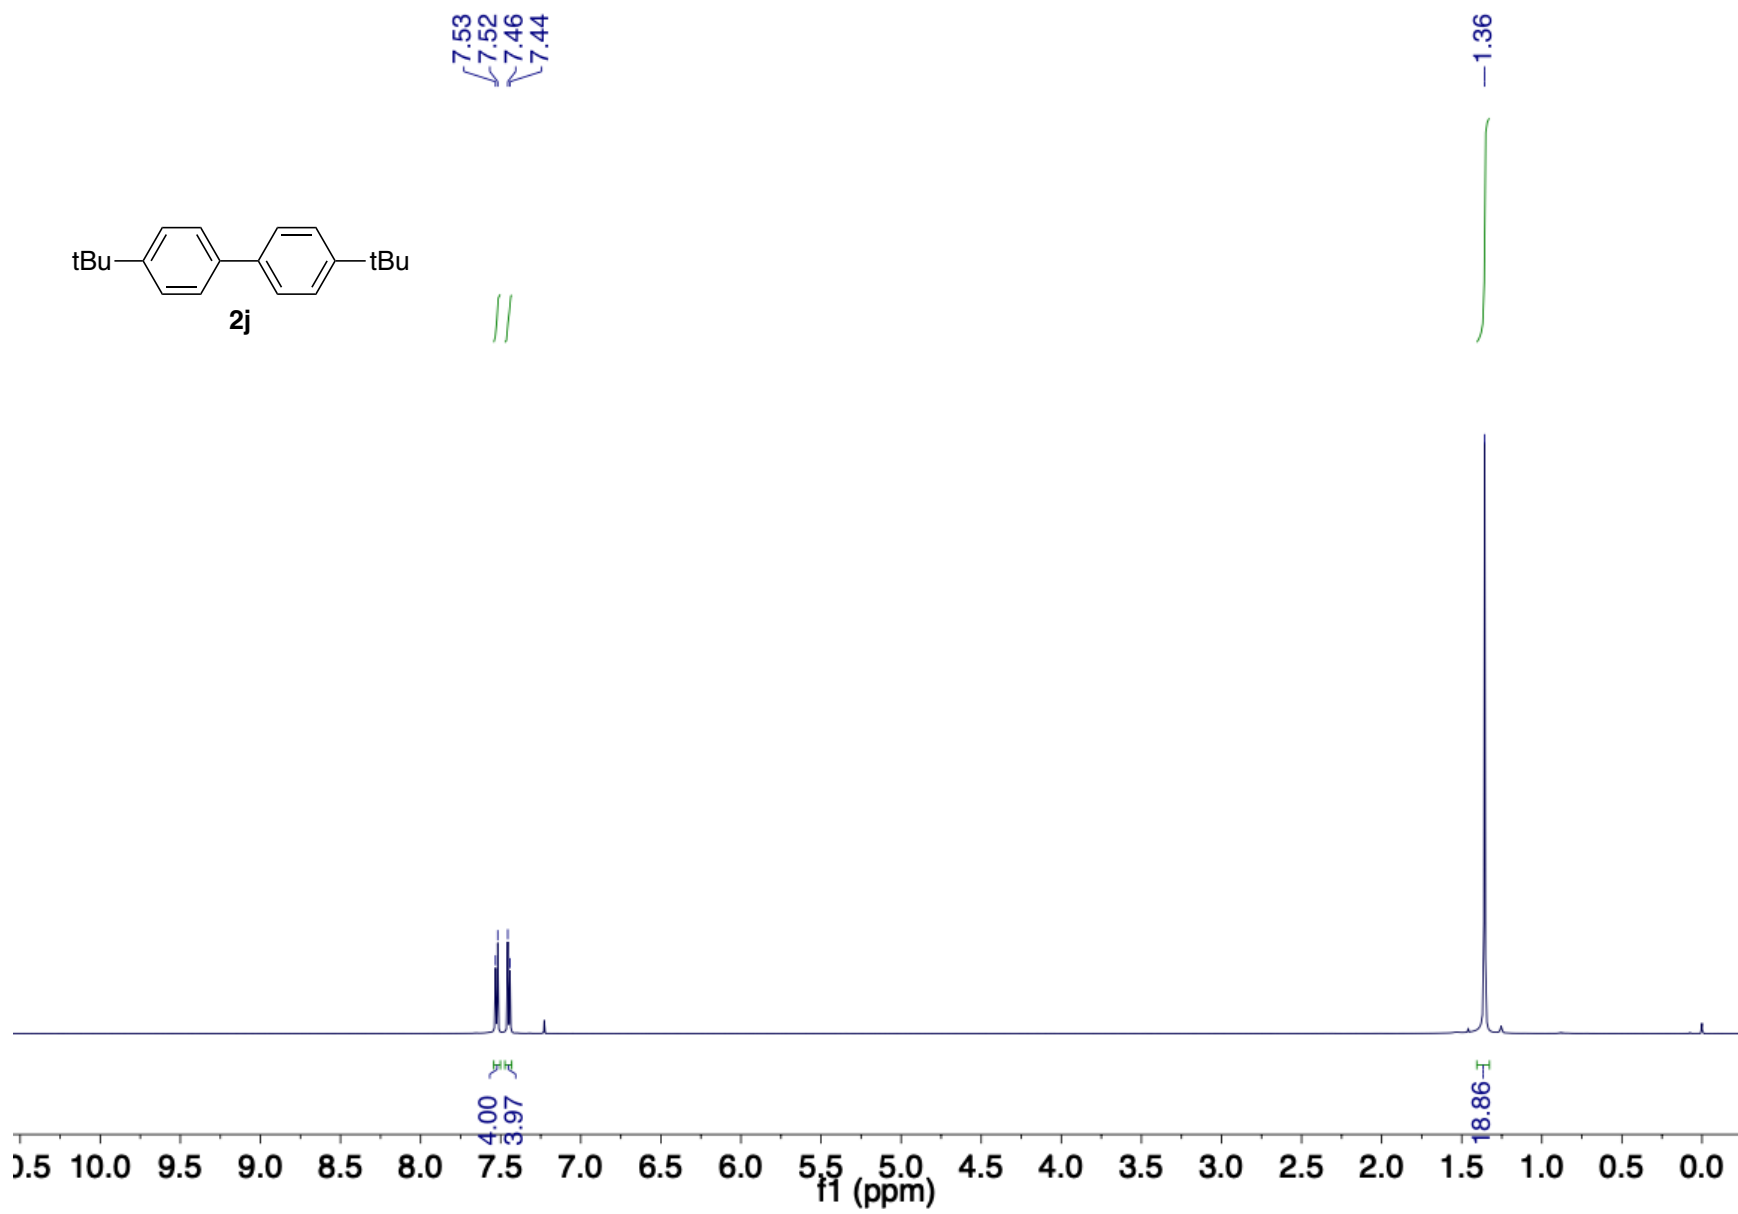

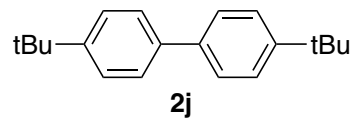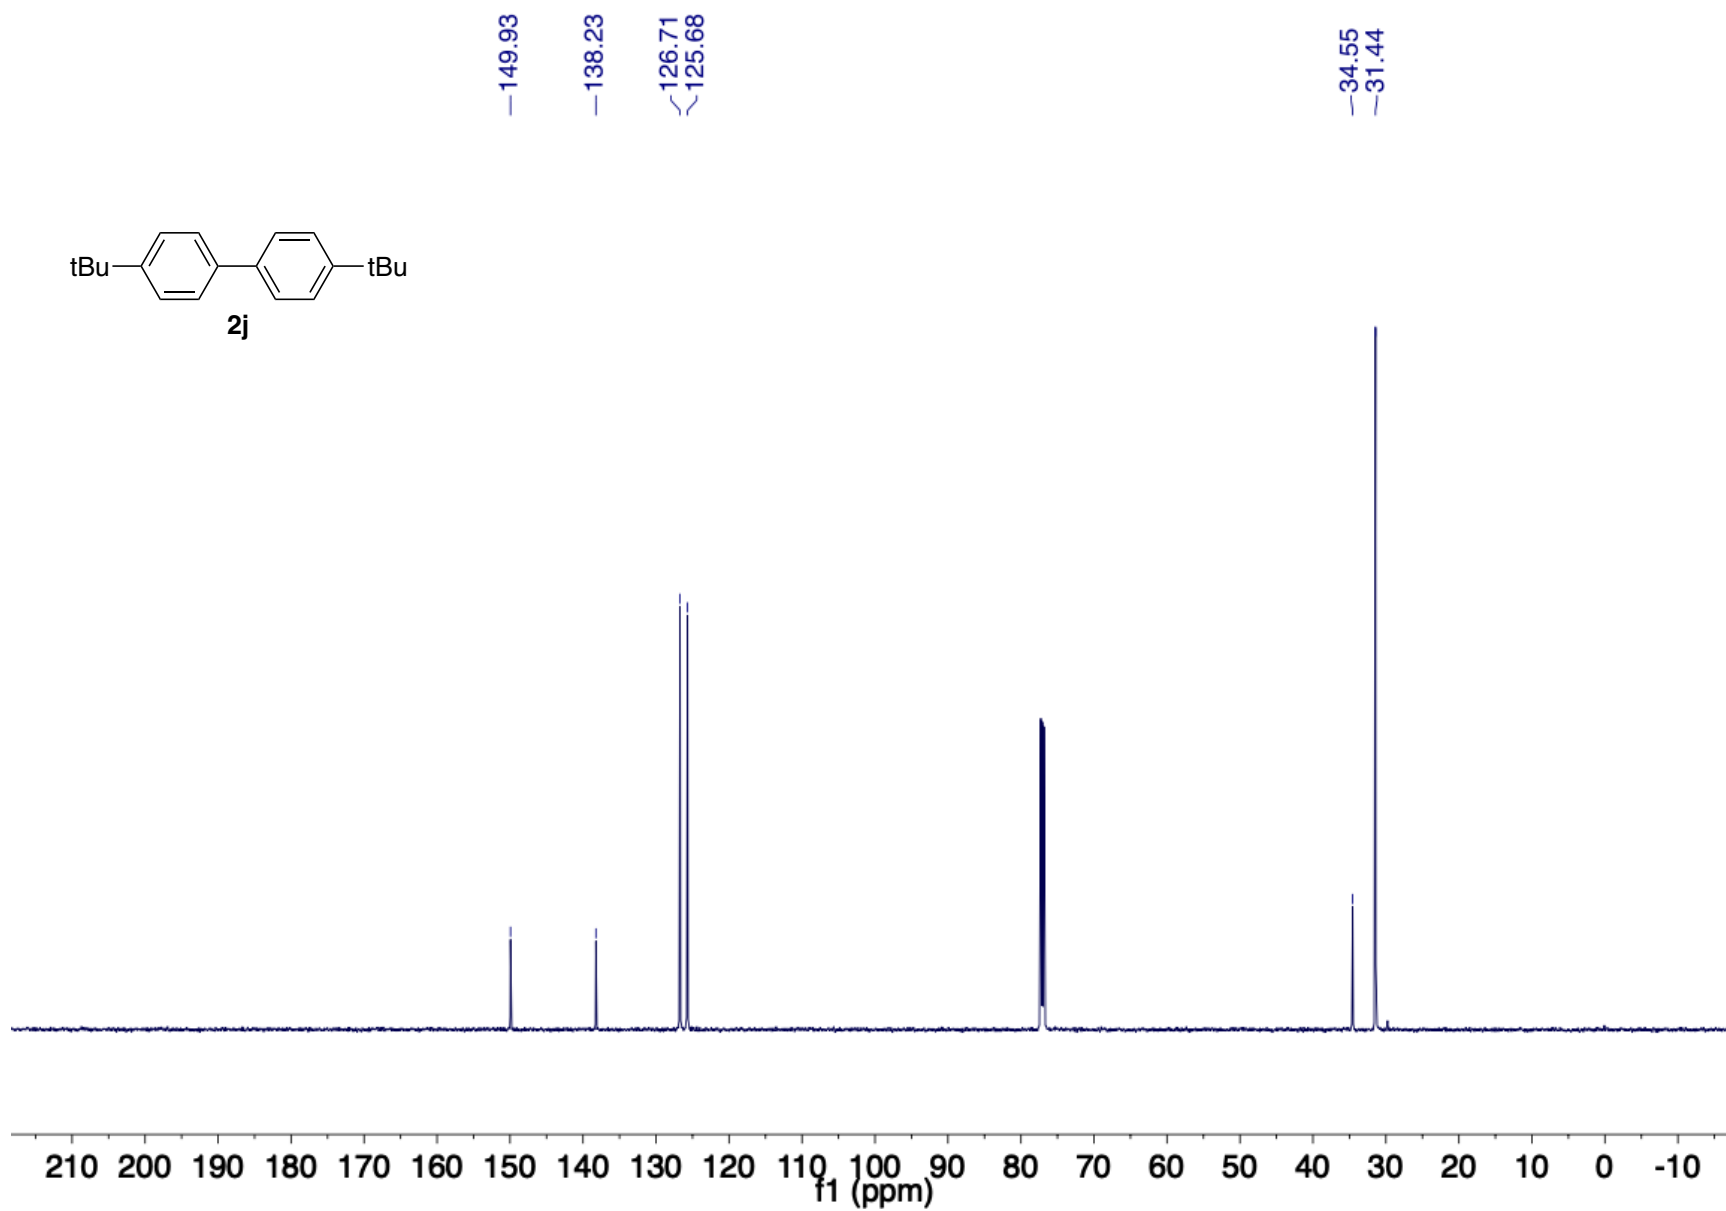

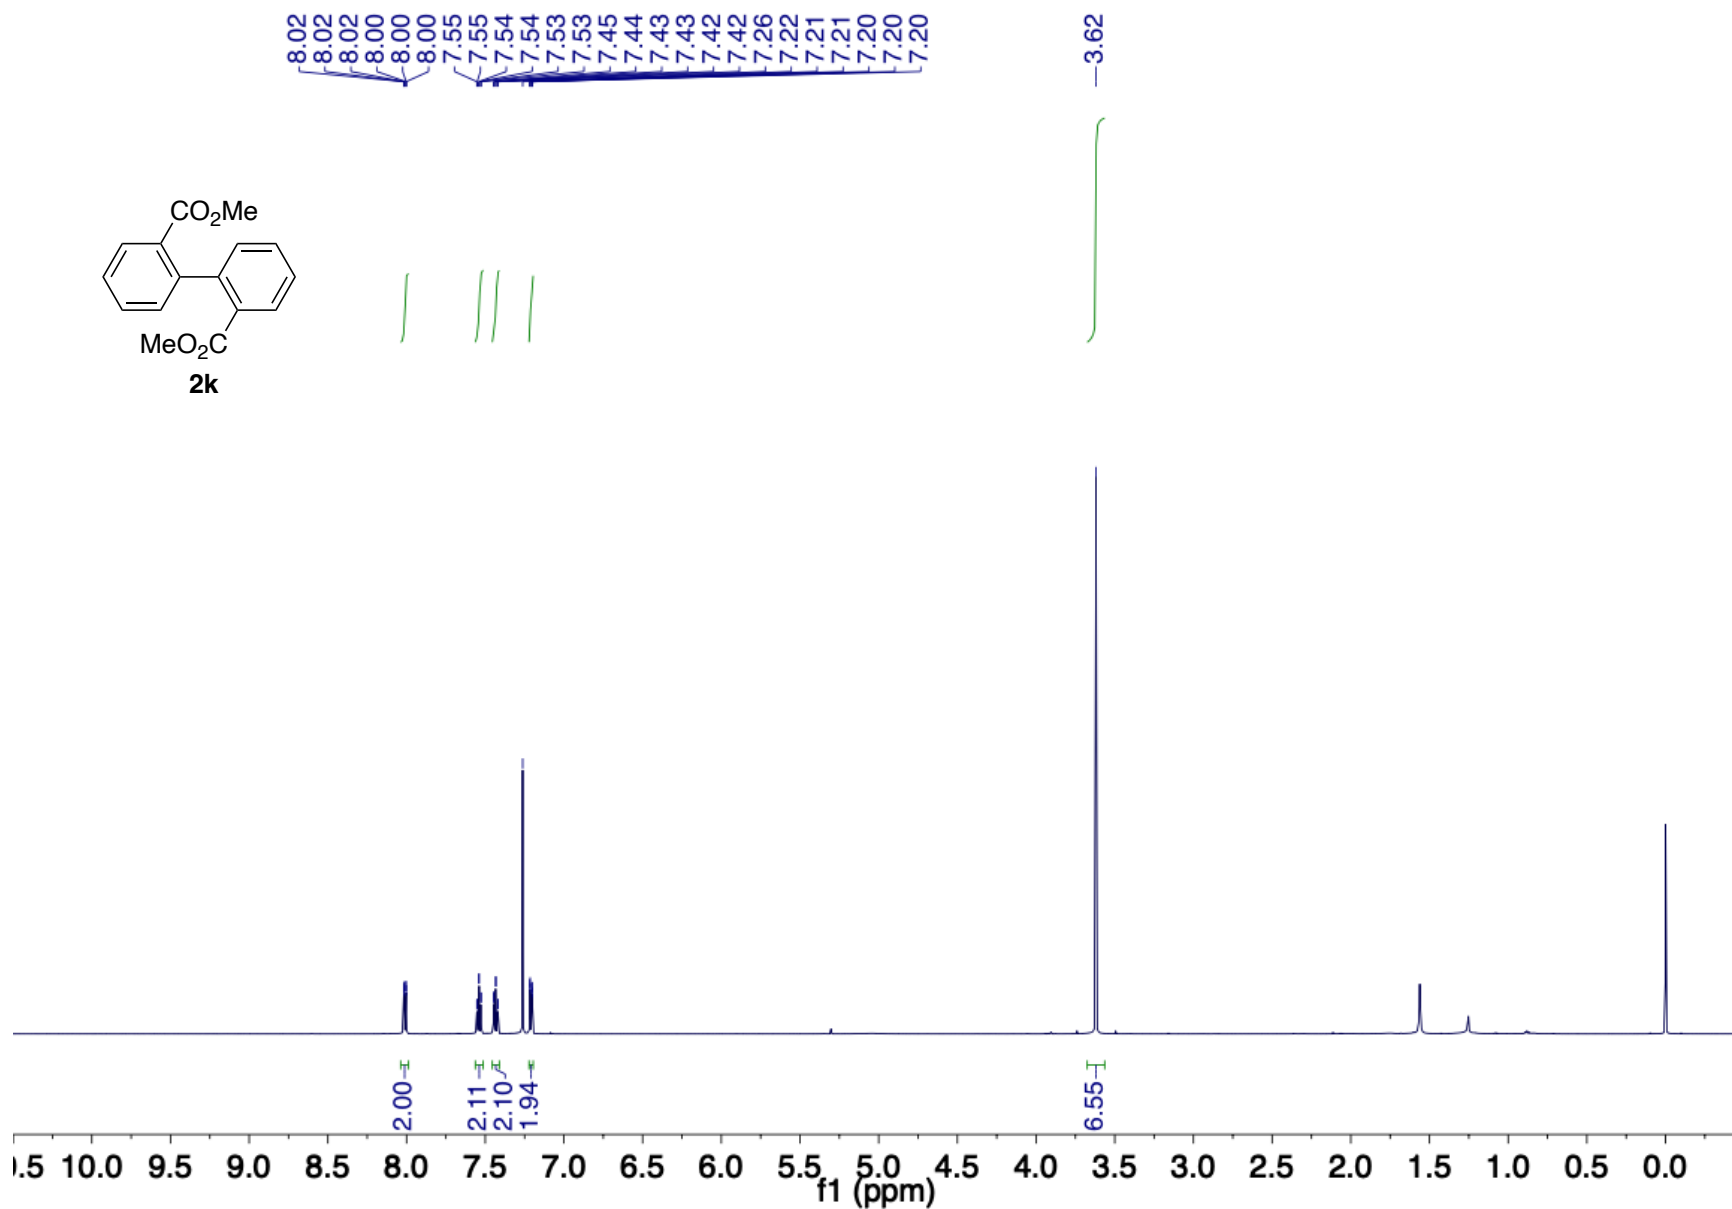

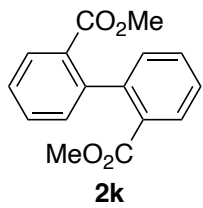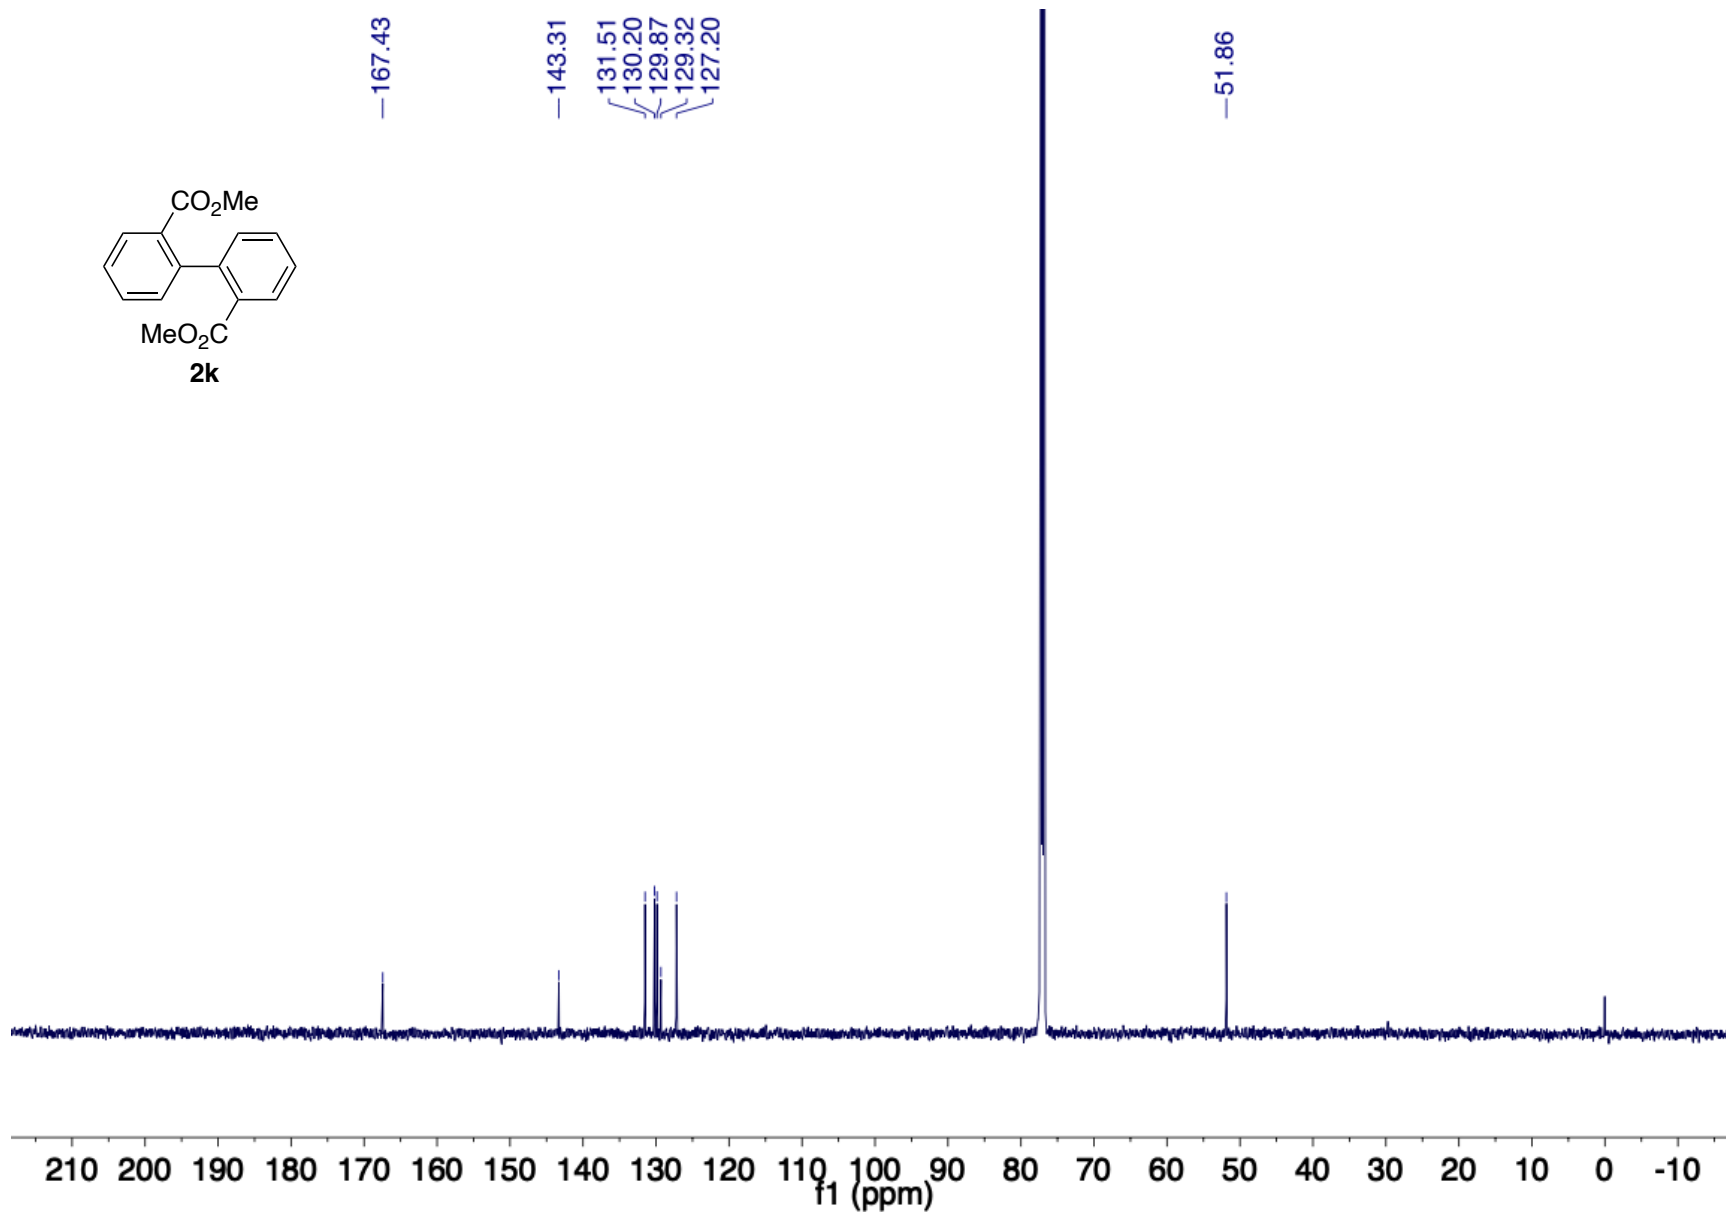

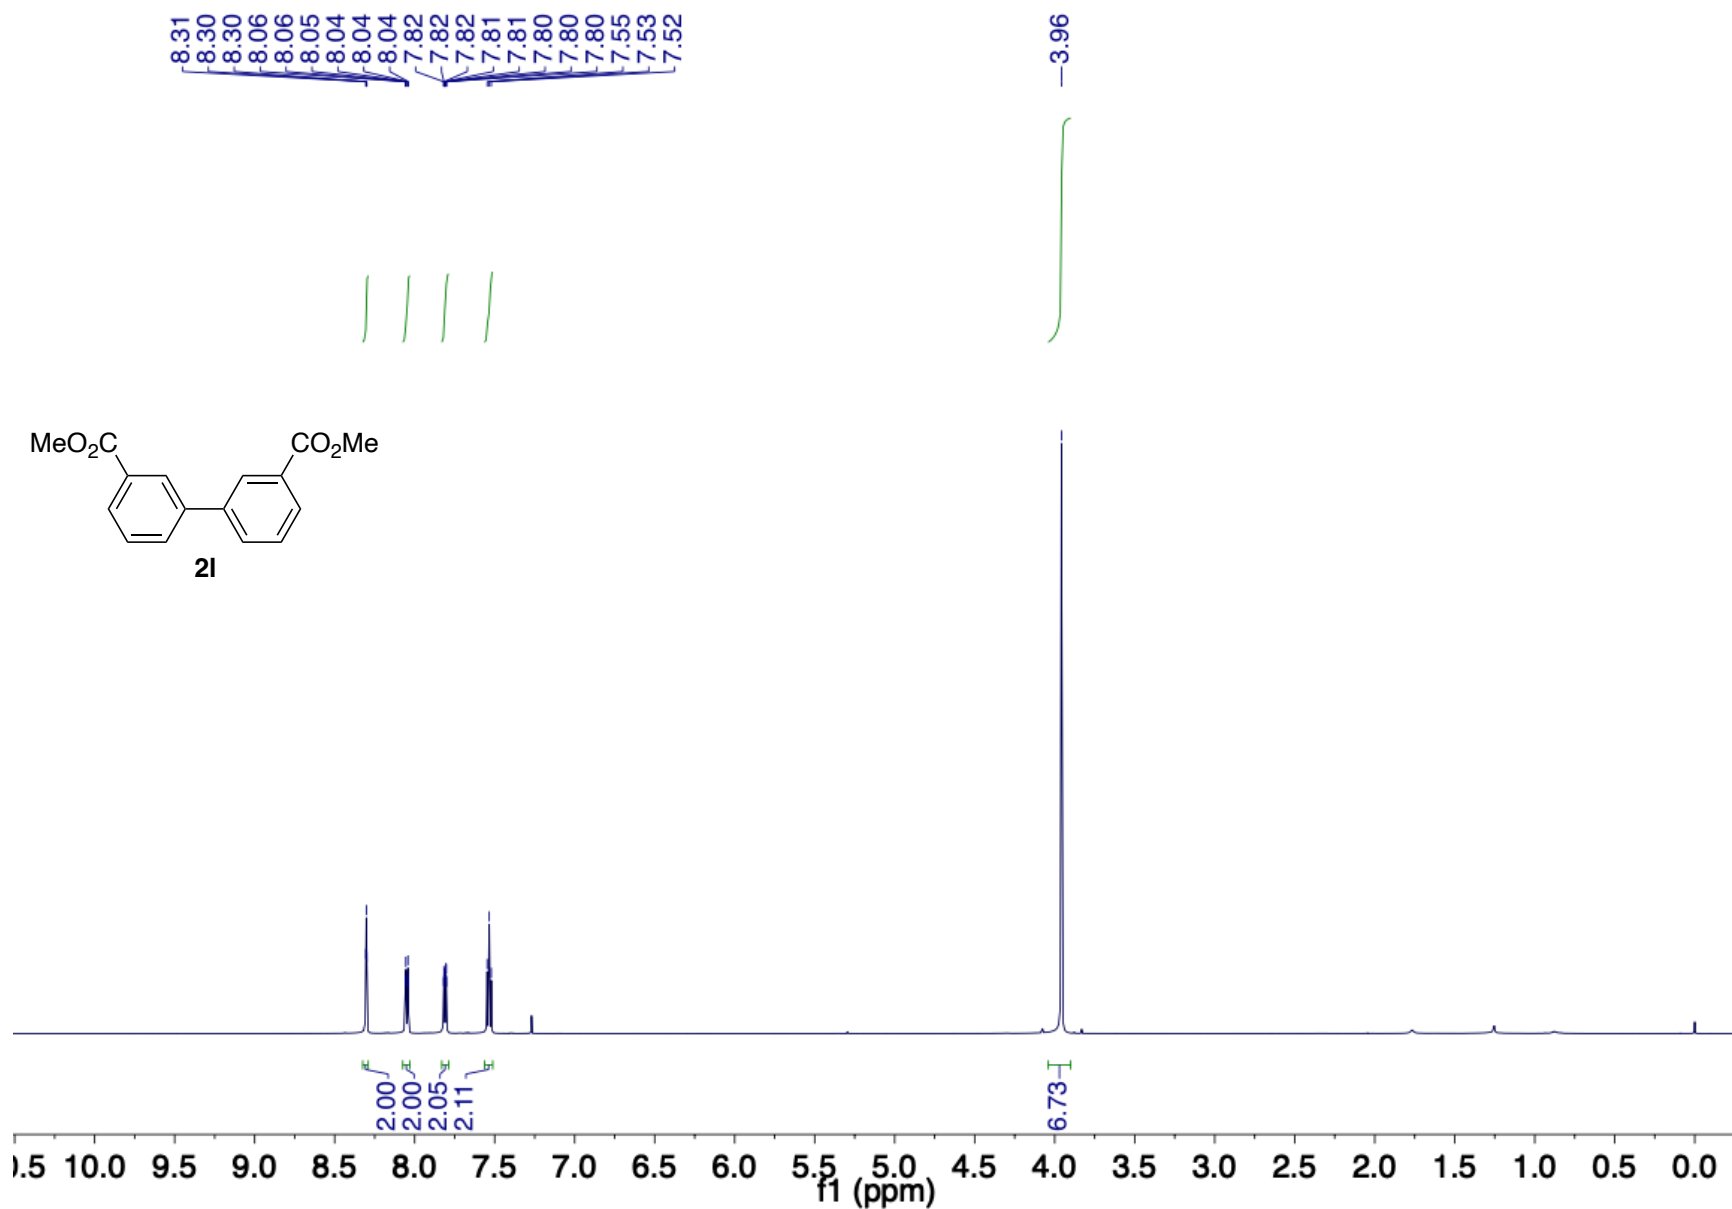



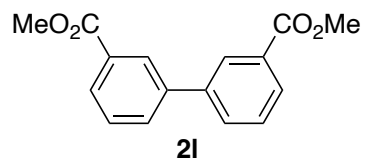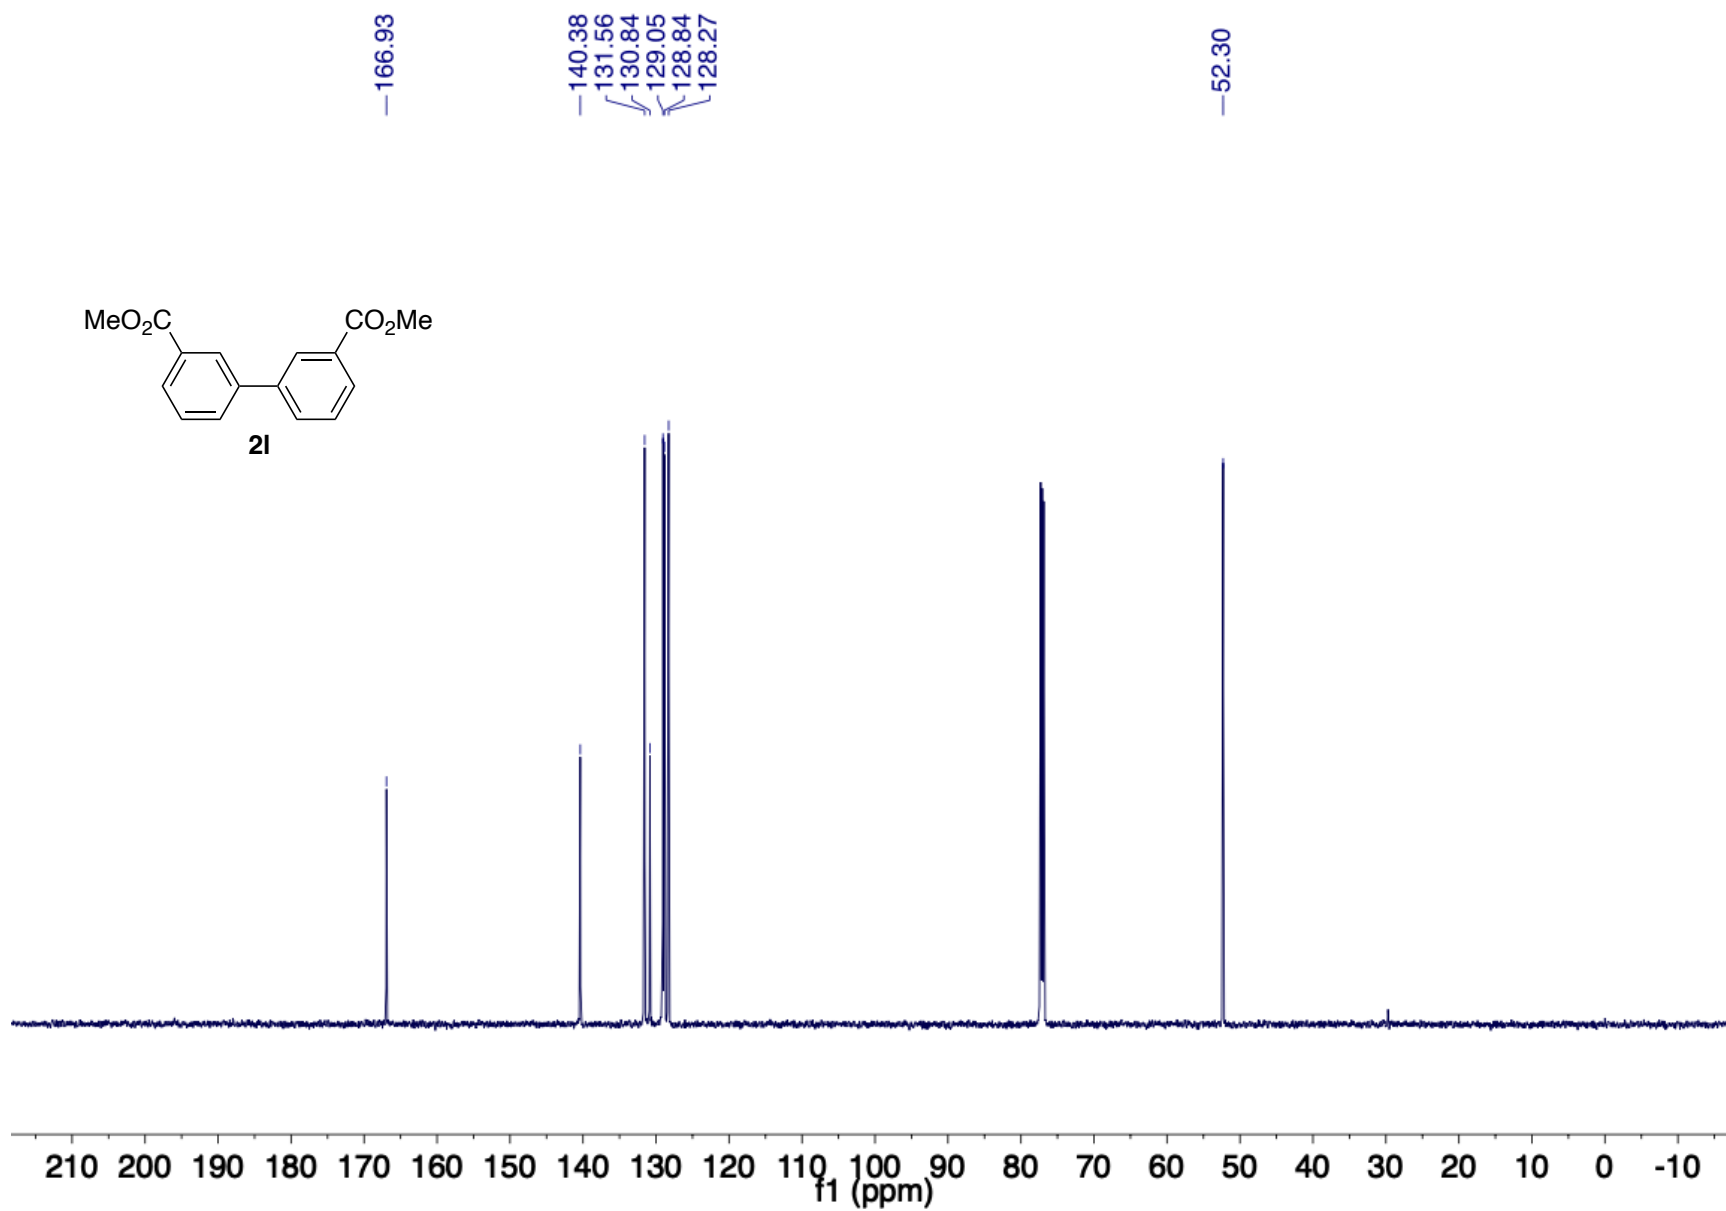

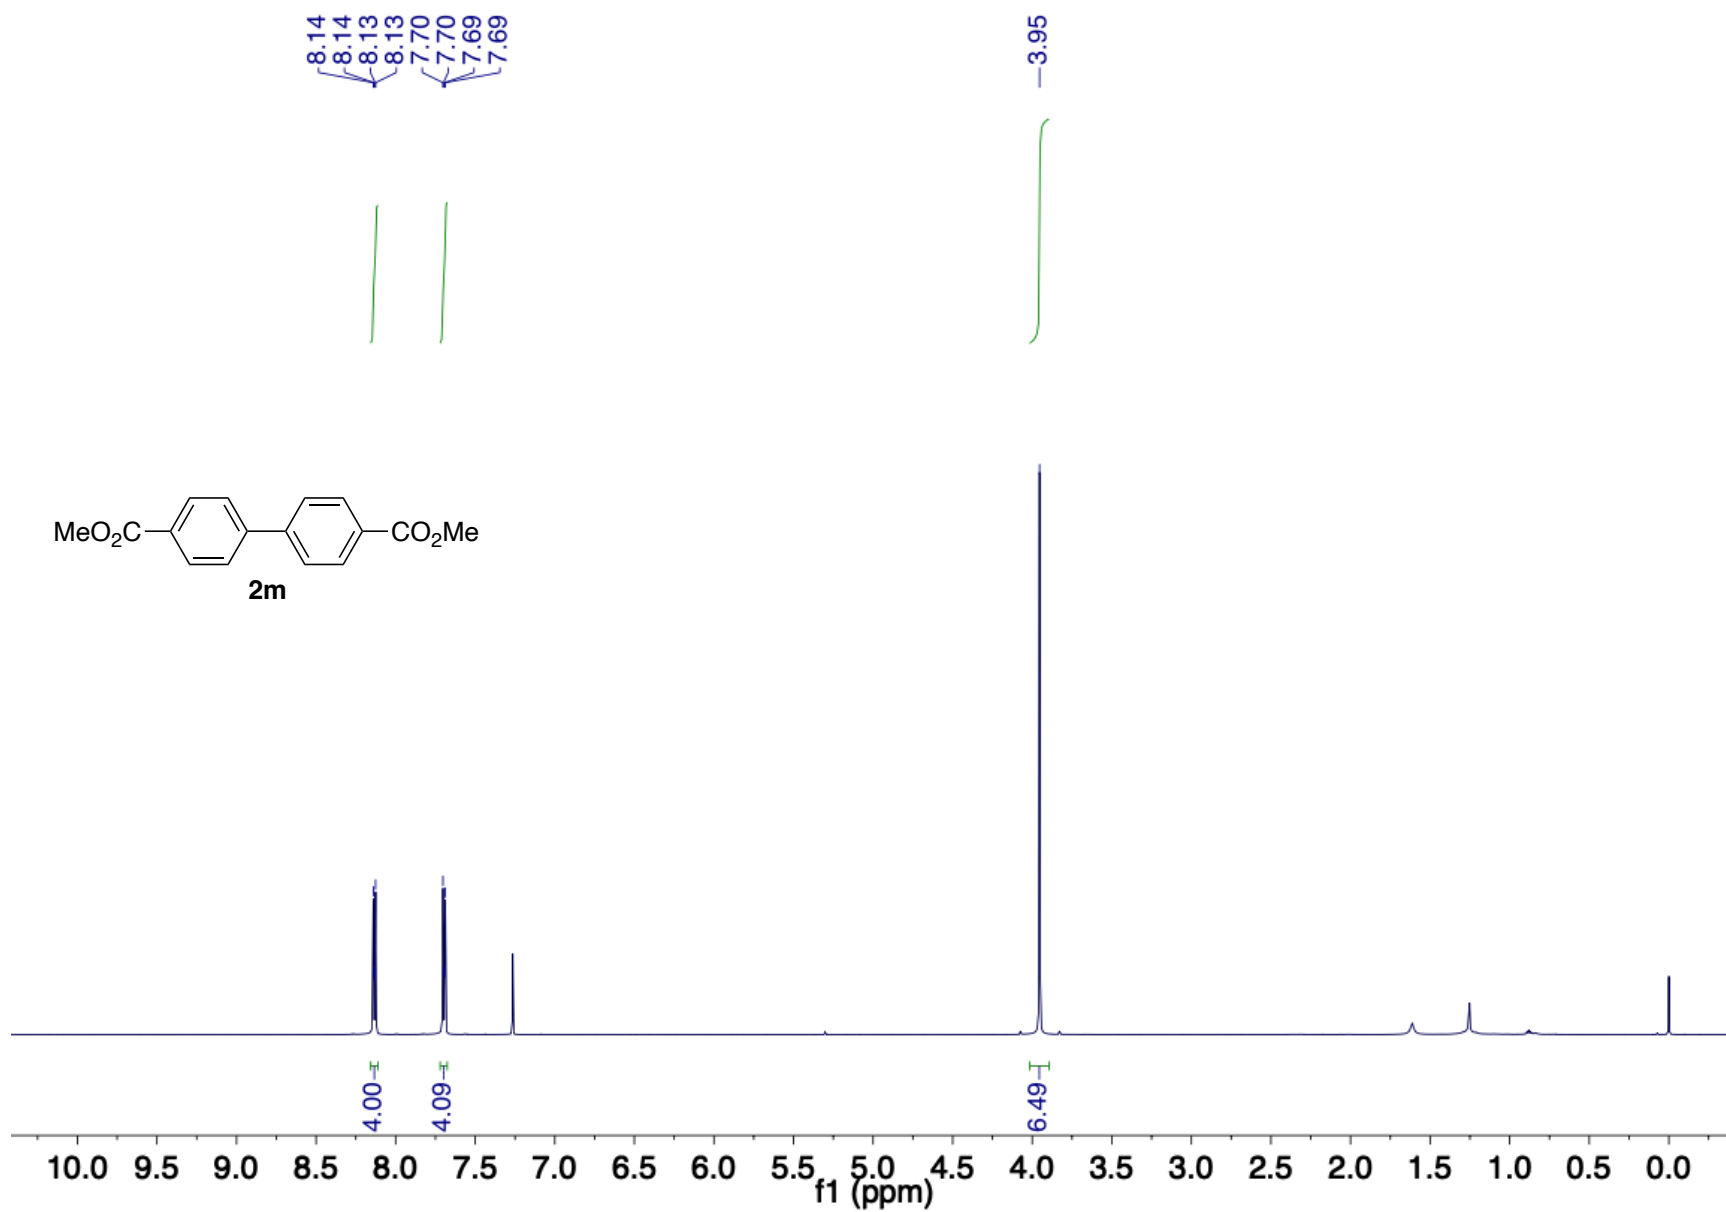

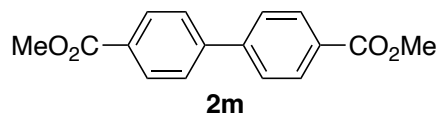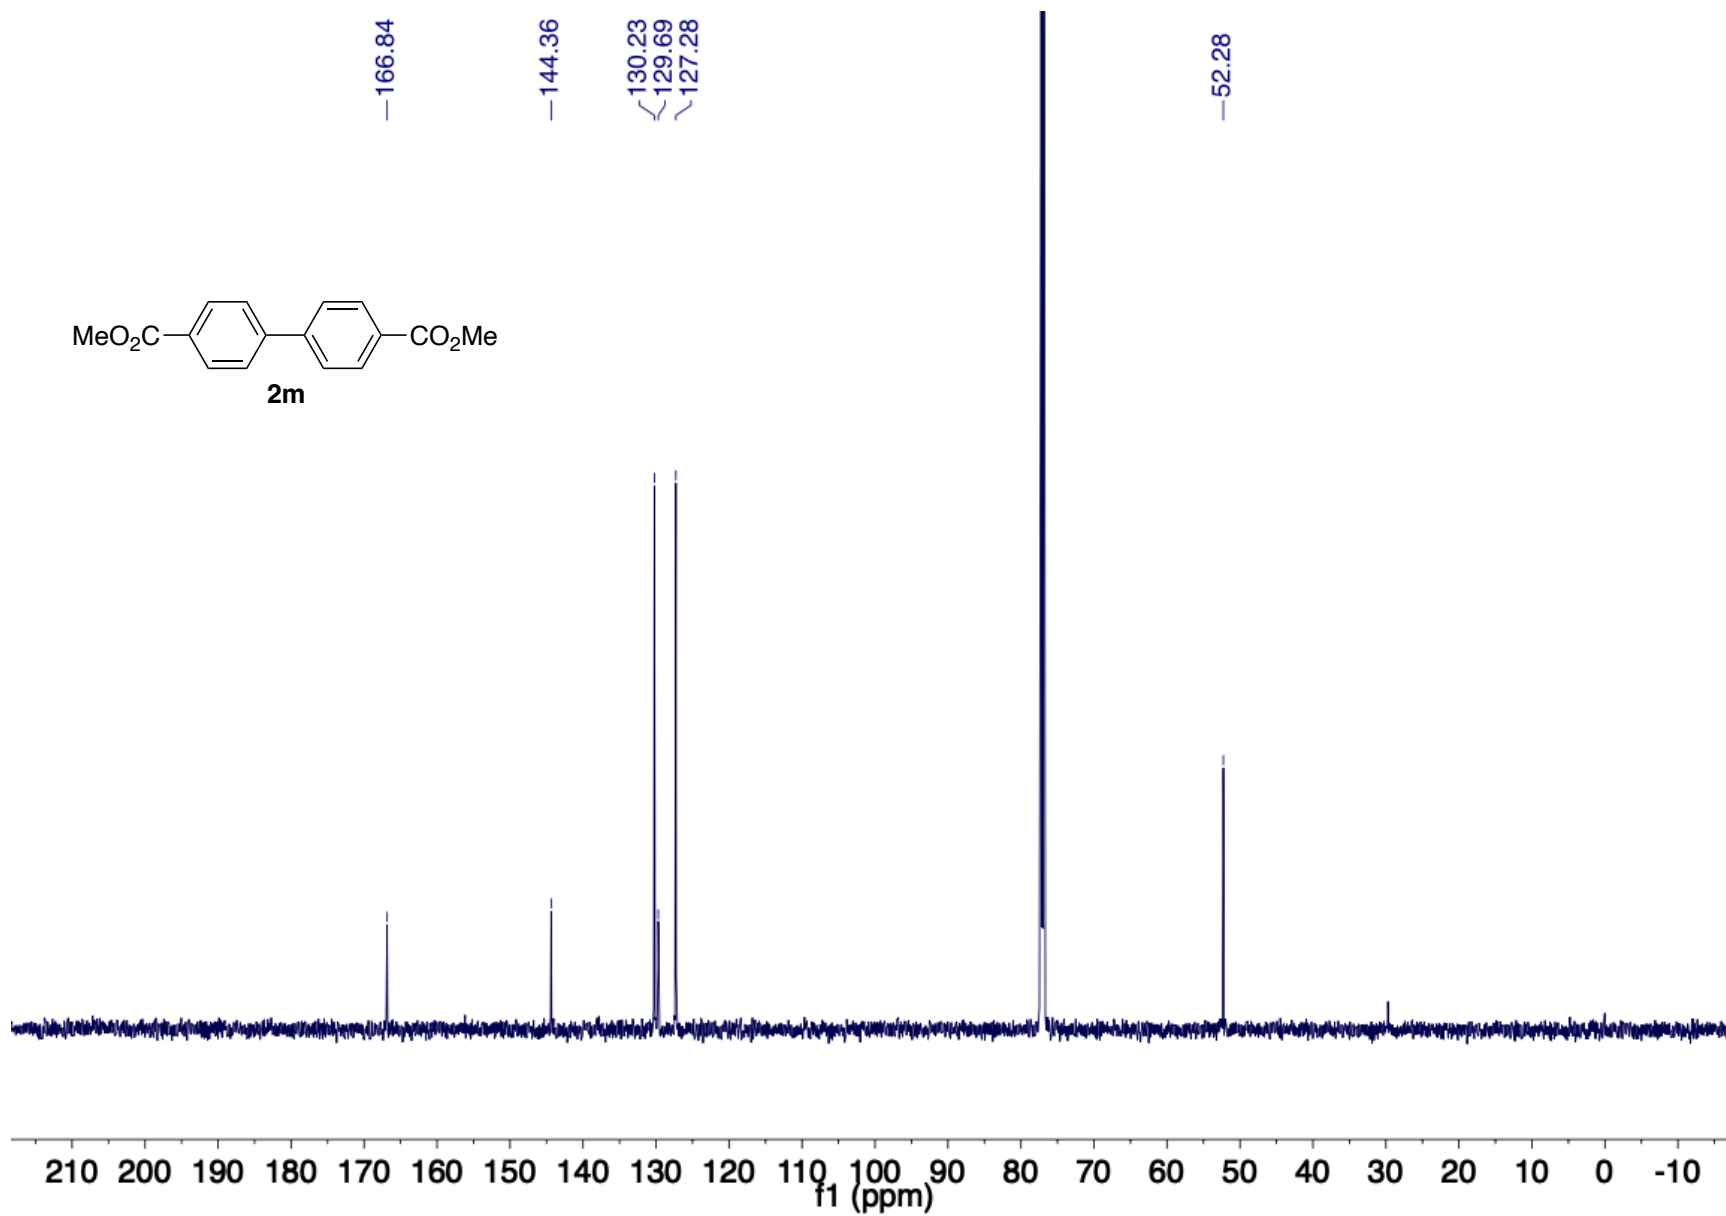

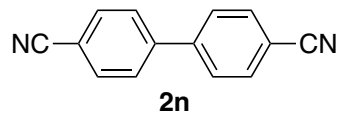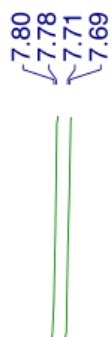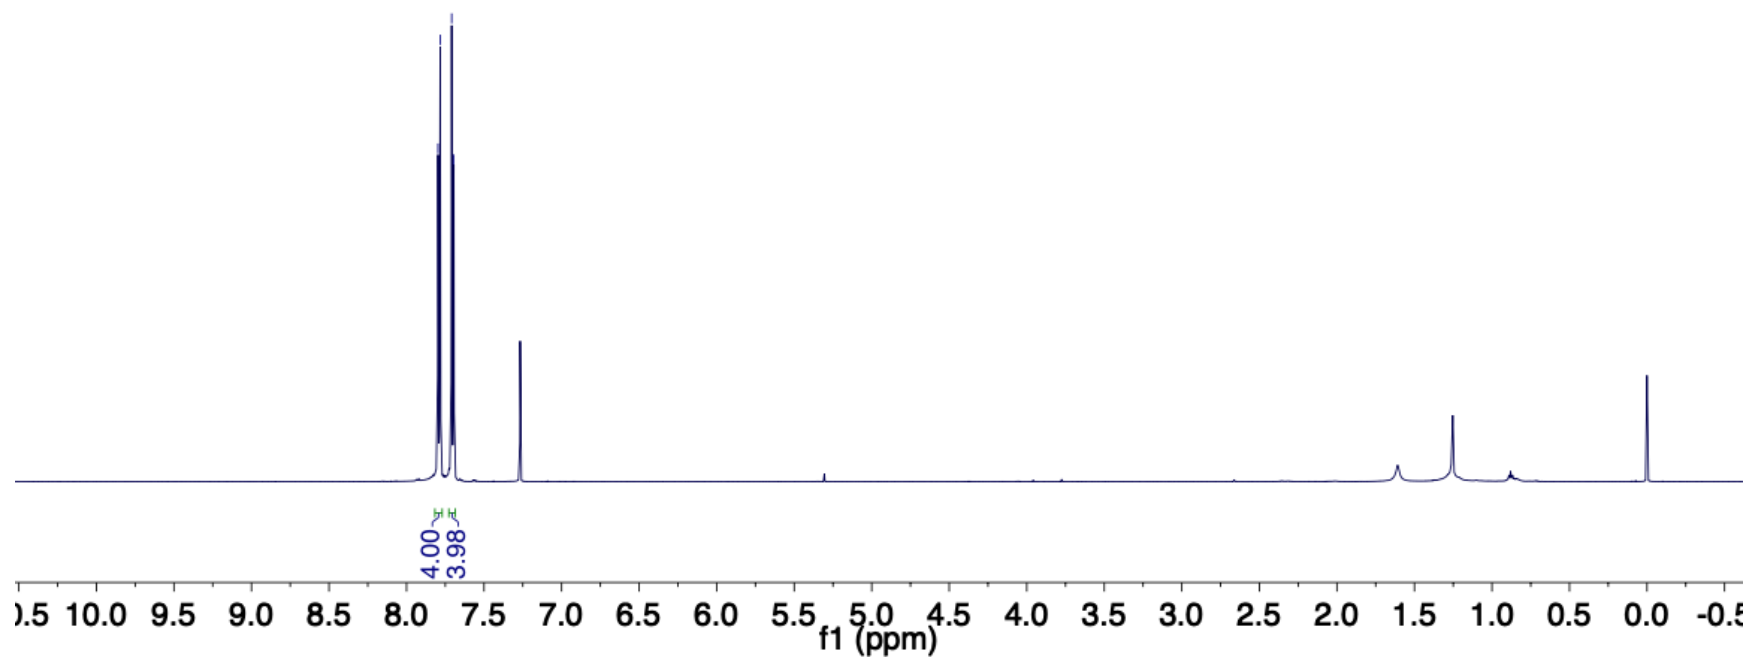

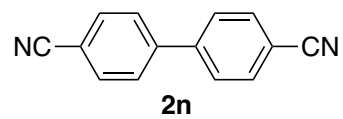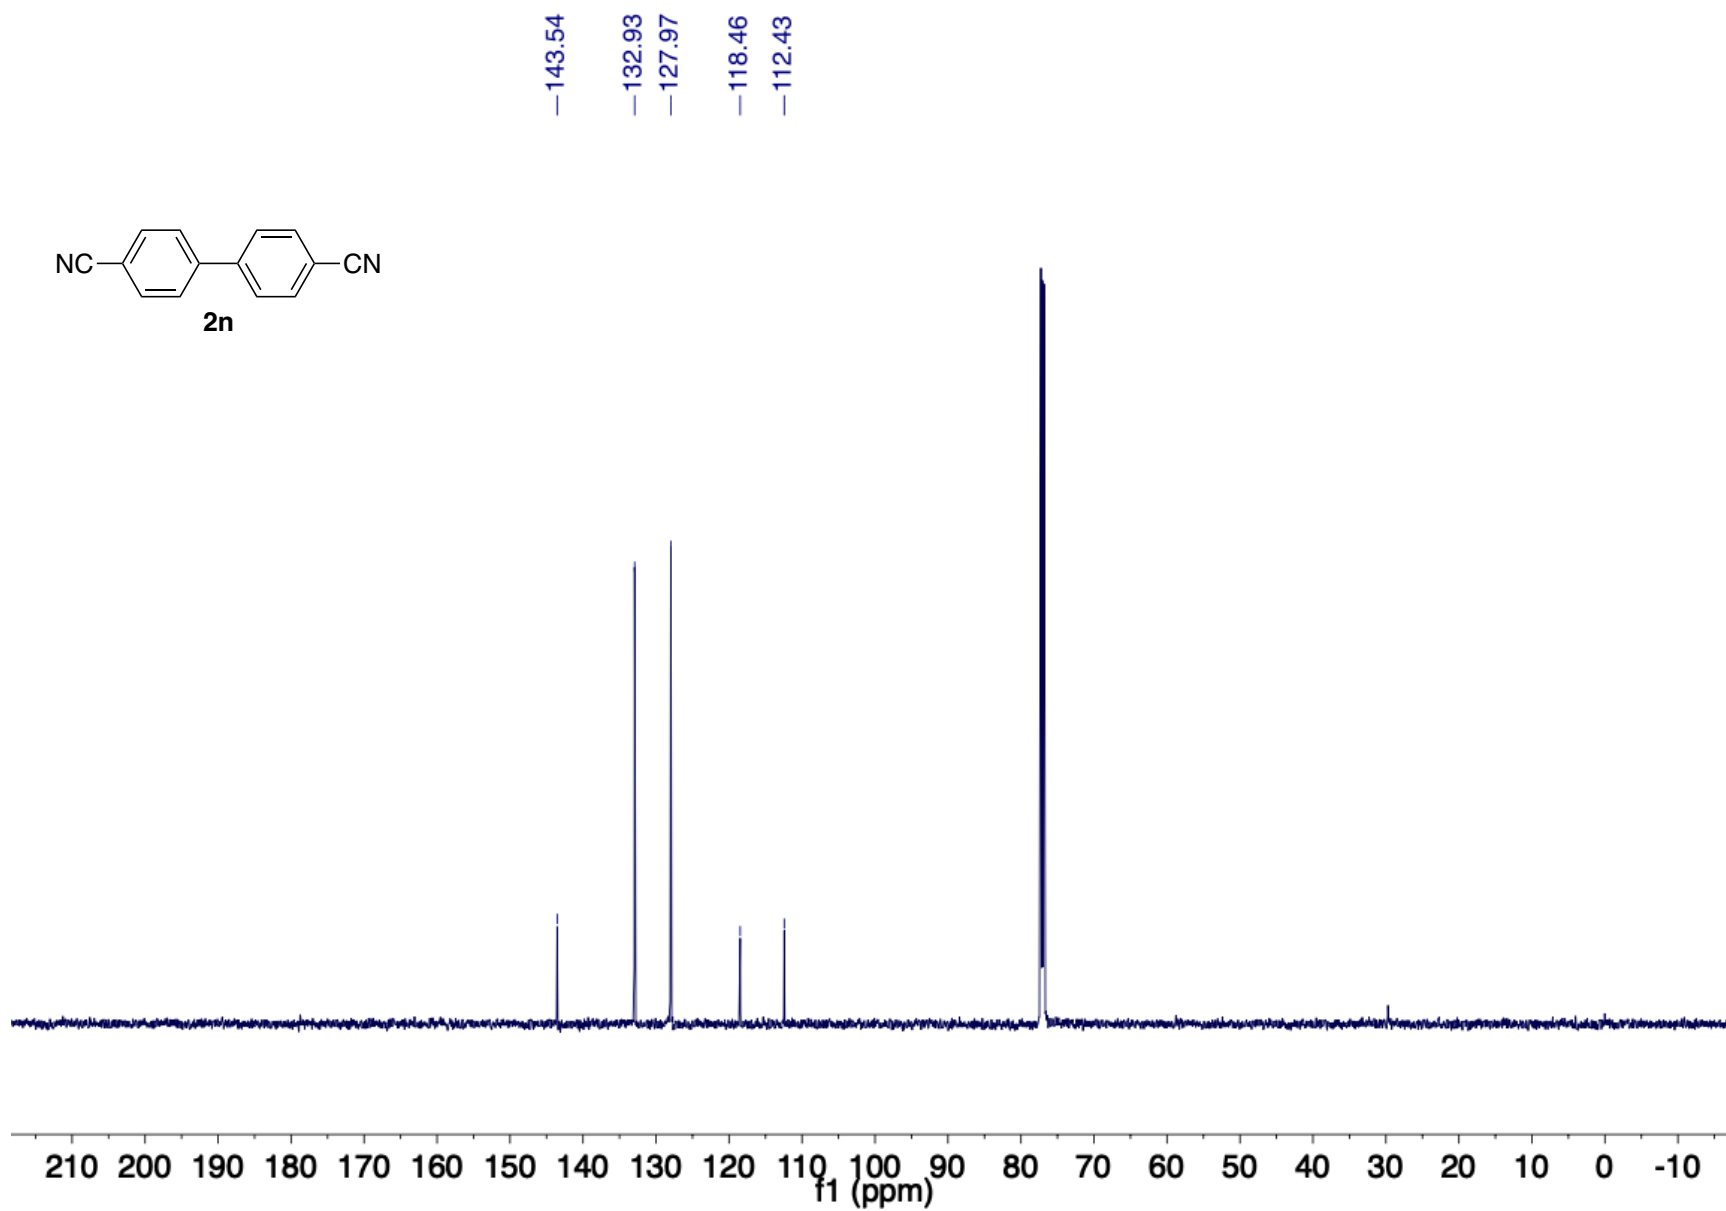

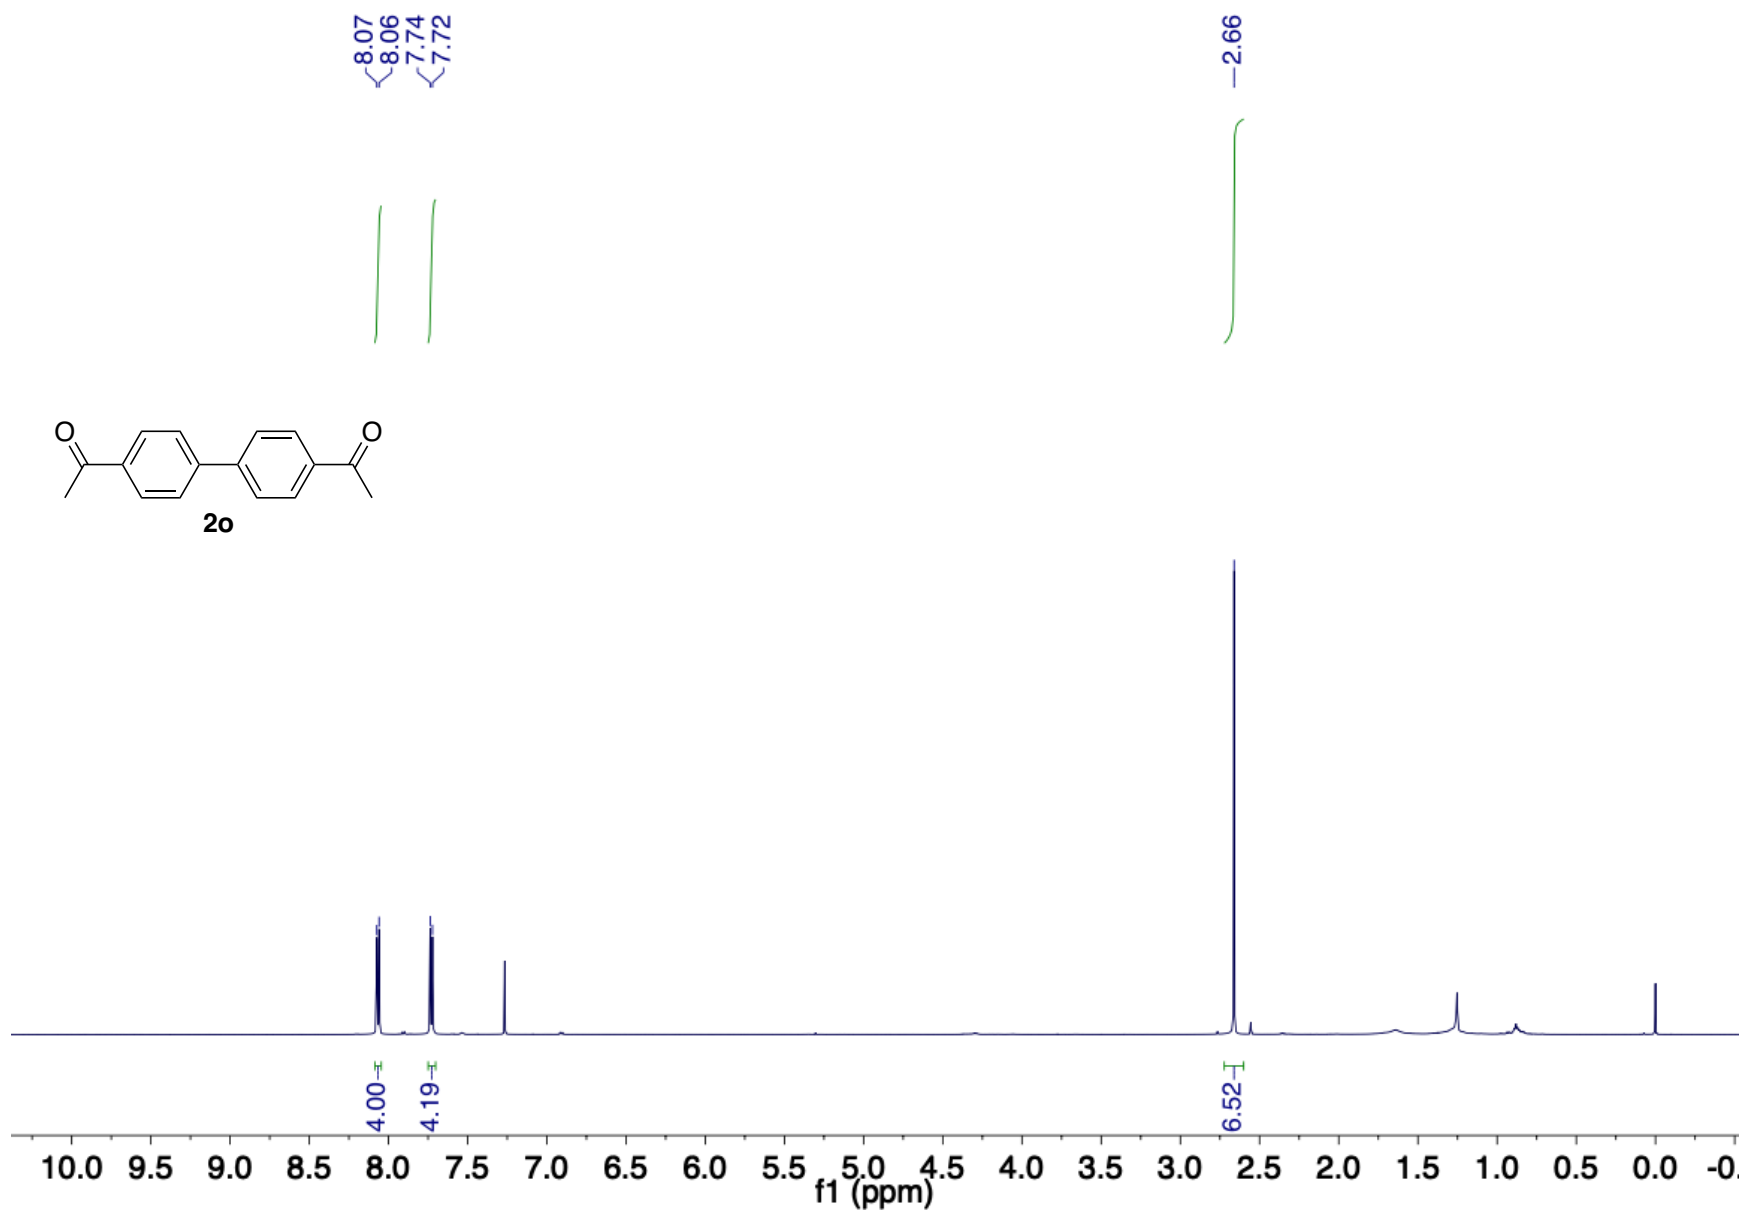

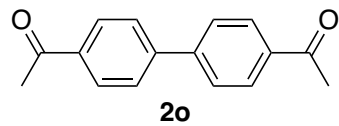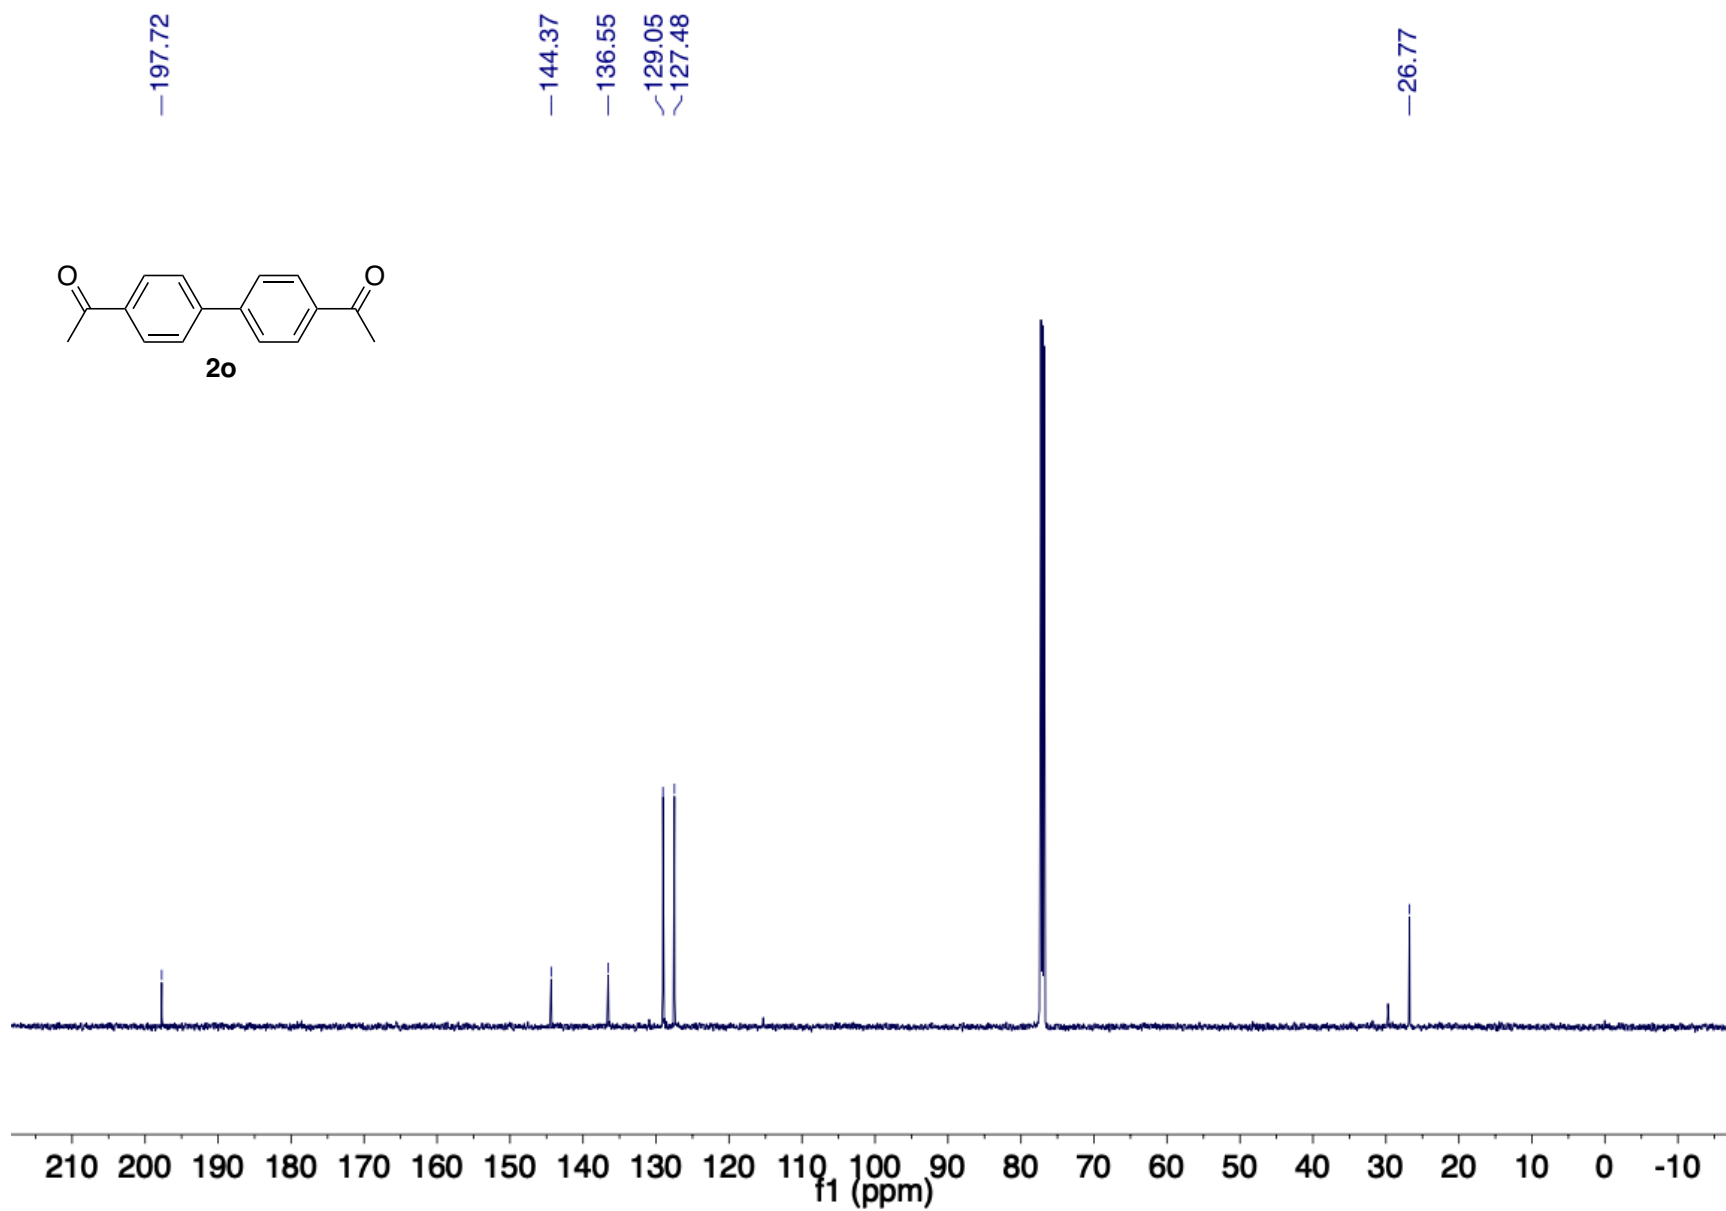

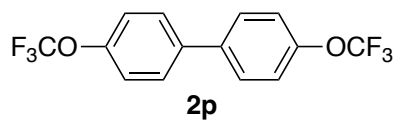

7.56  
7.56  
7.55  
7.55  
7.30  
7.30  
7.29  
7.29  
7.28

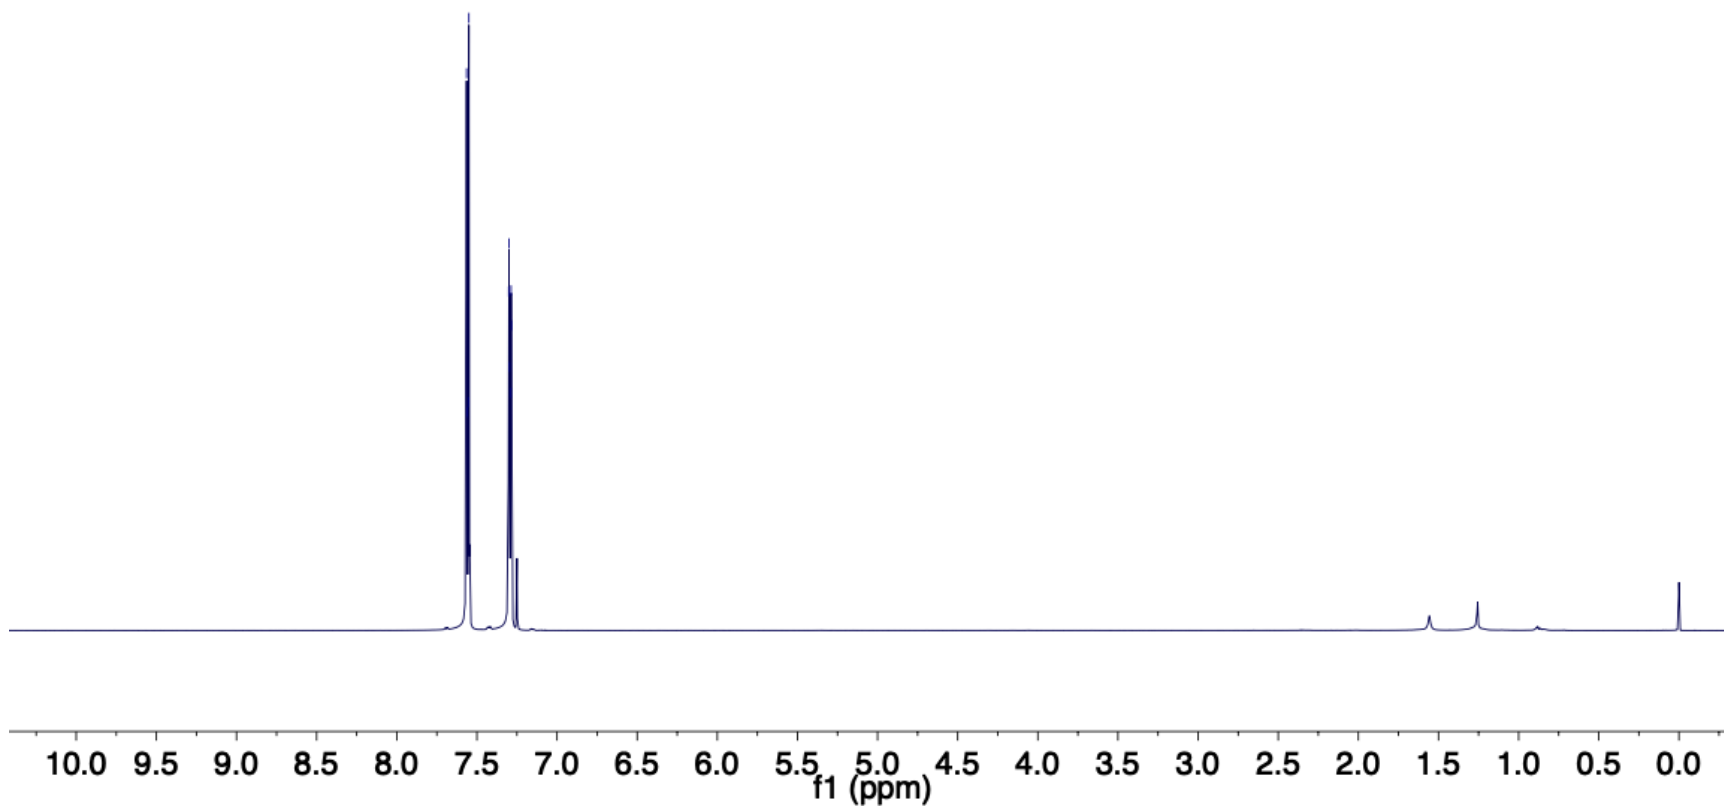



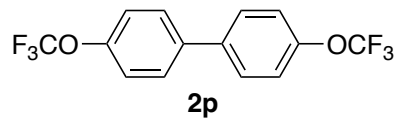

—148.94  
—138.59  
128.49  
123.07  
121.38  
119.66  
117.96

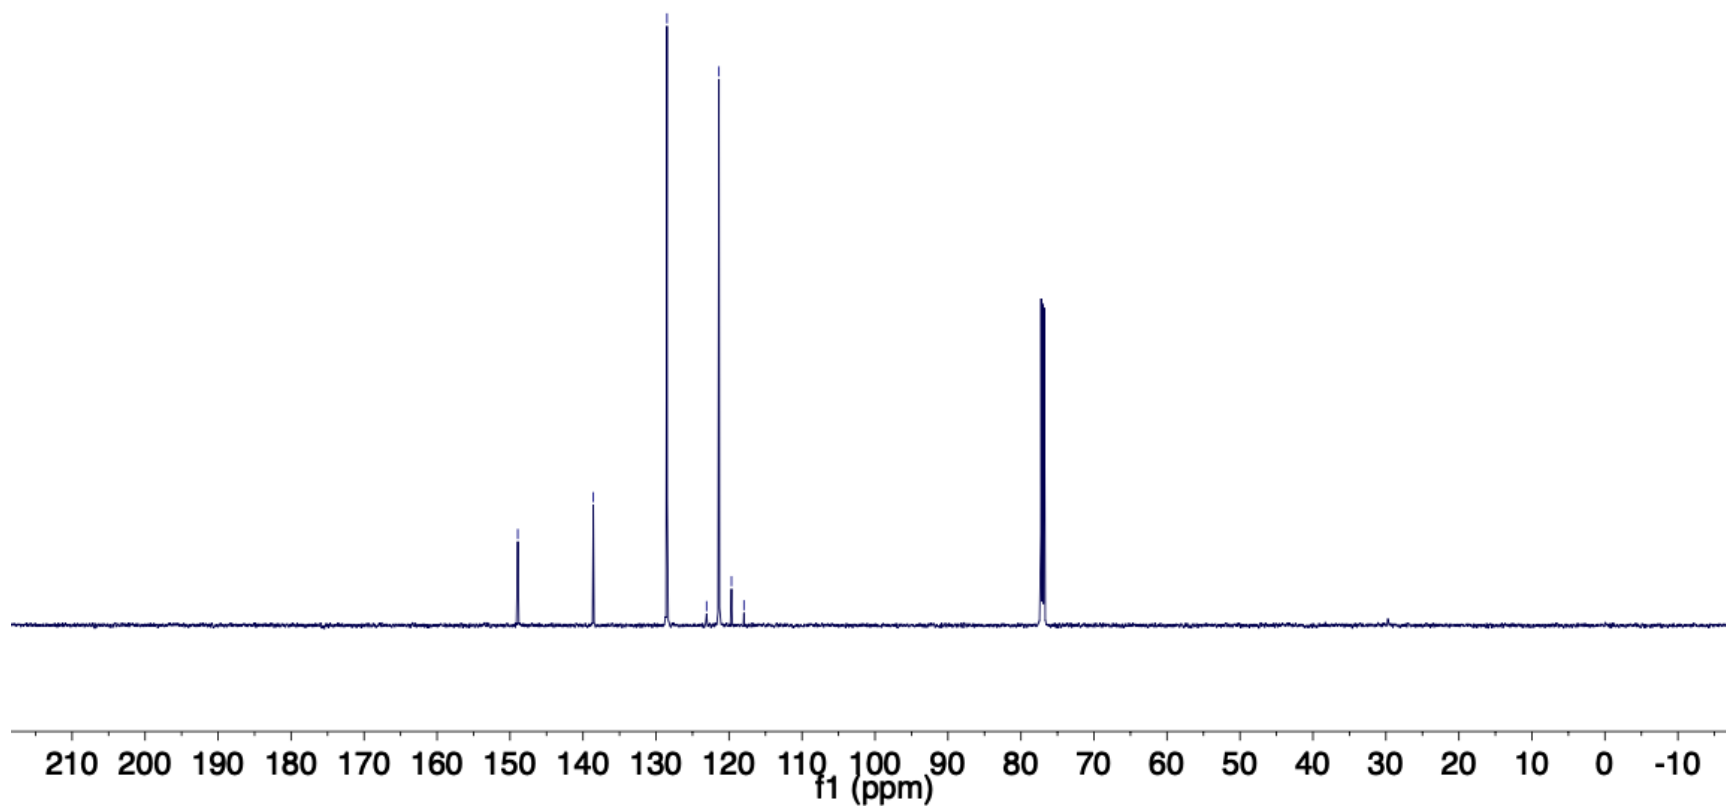

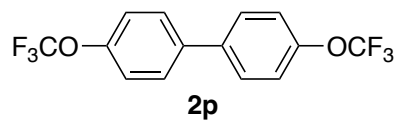

—57.85

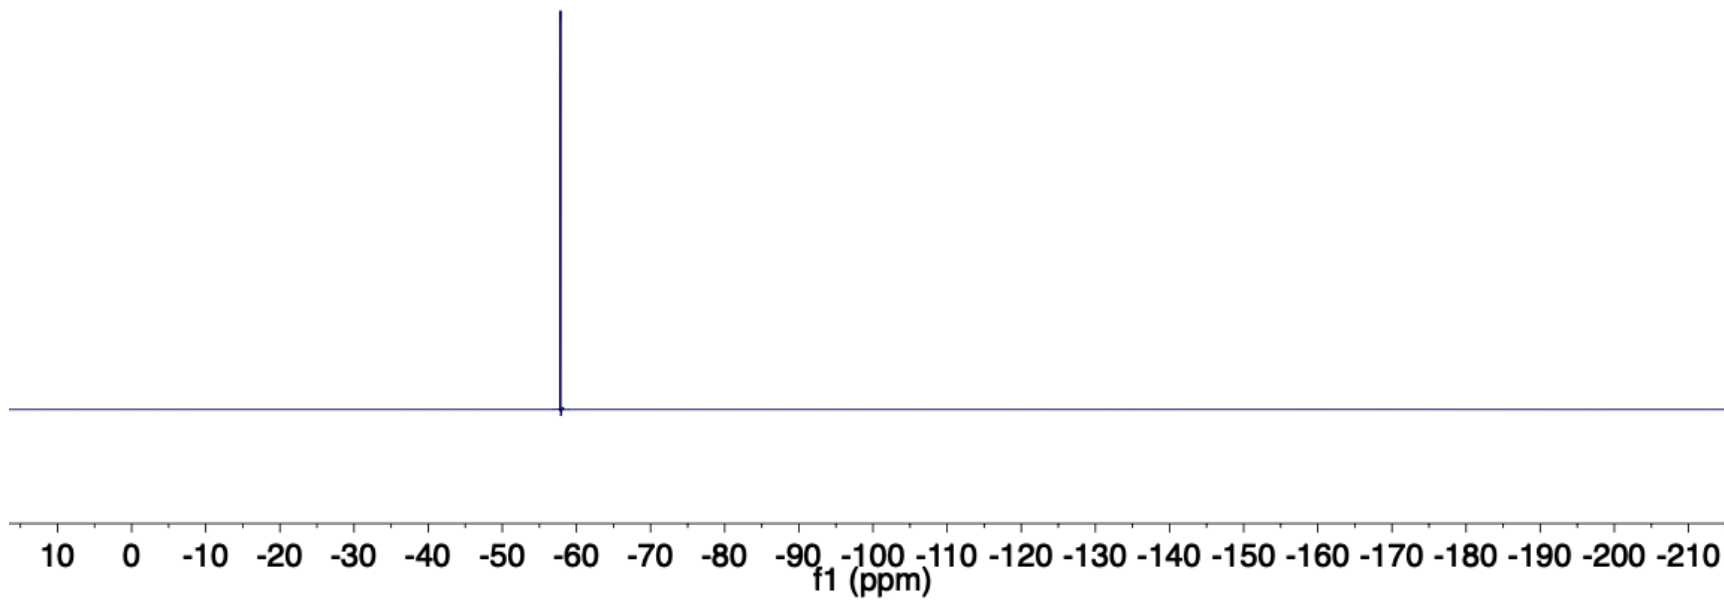

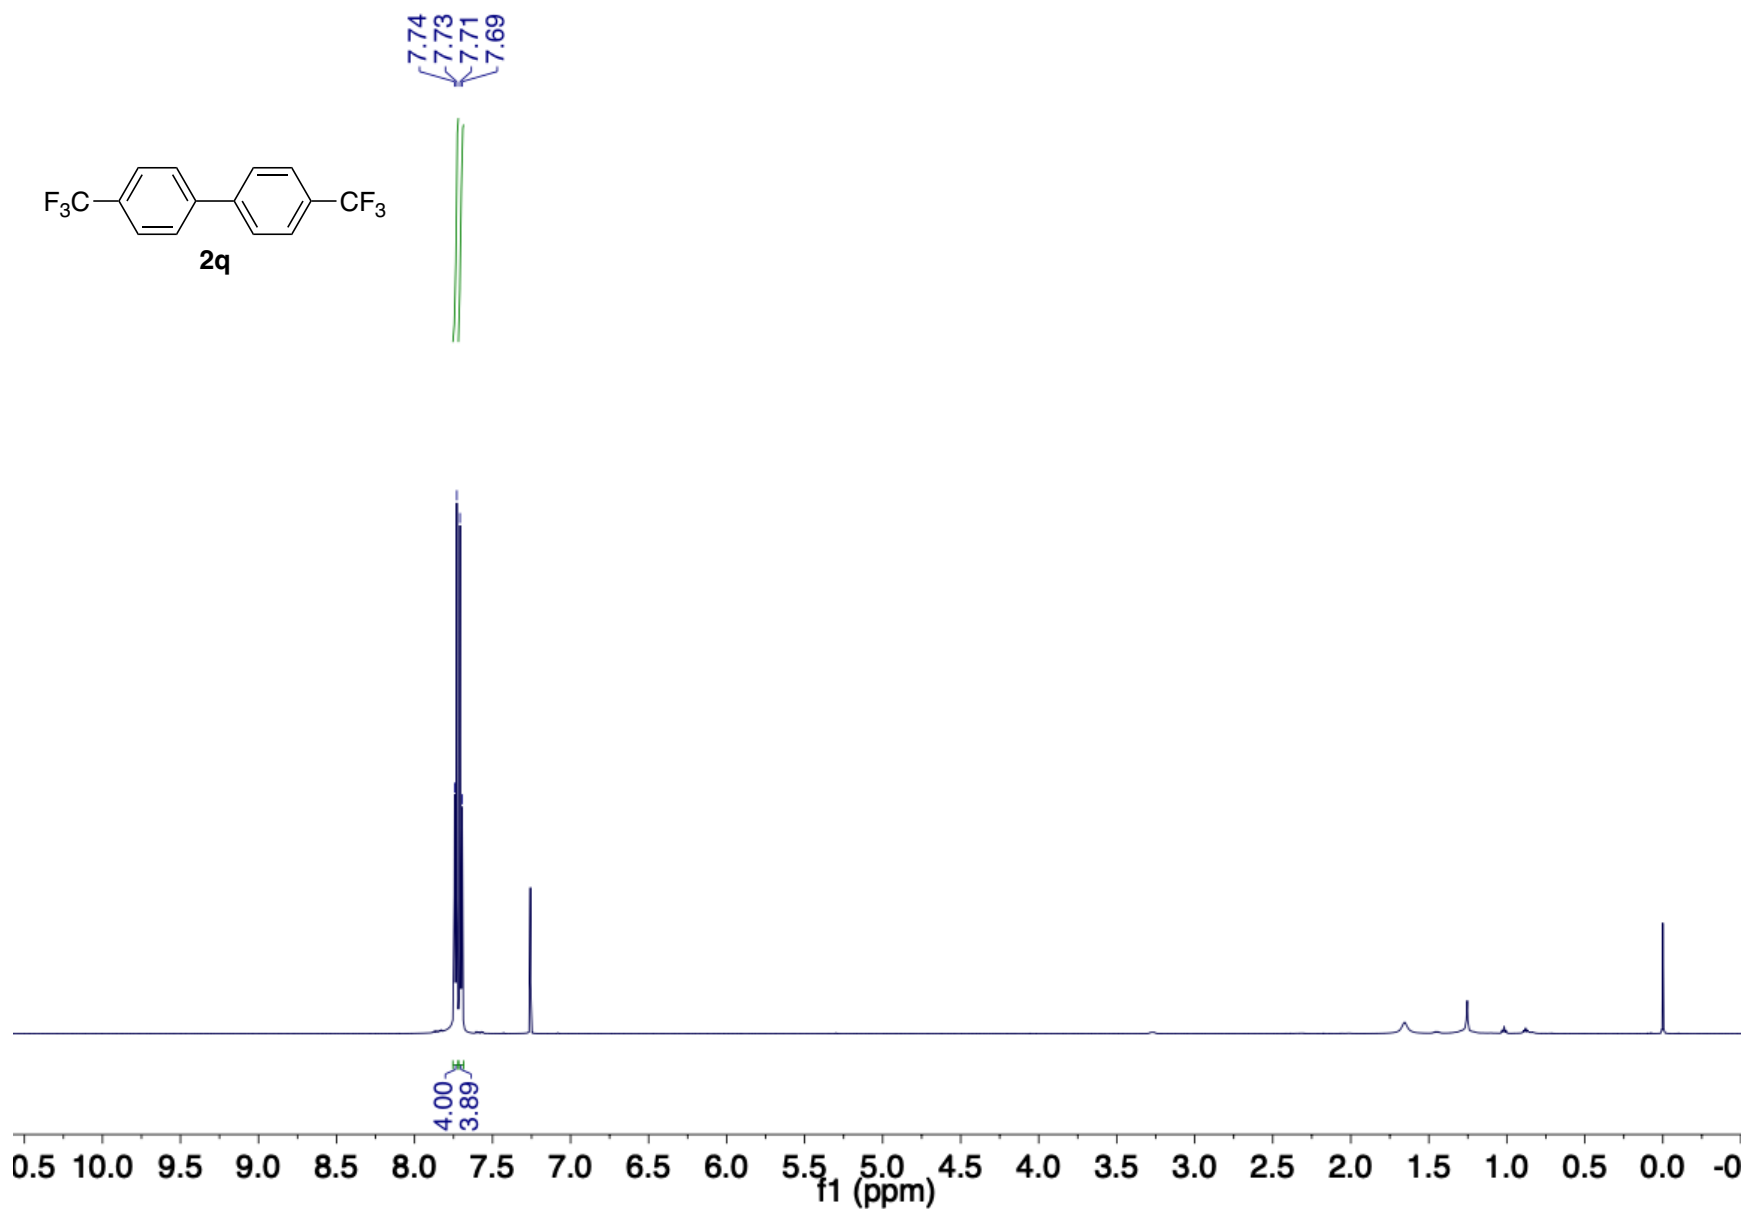

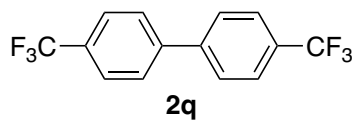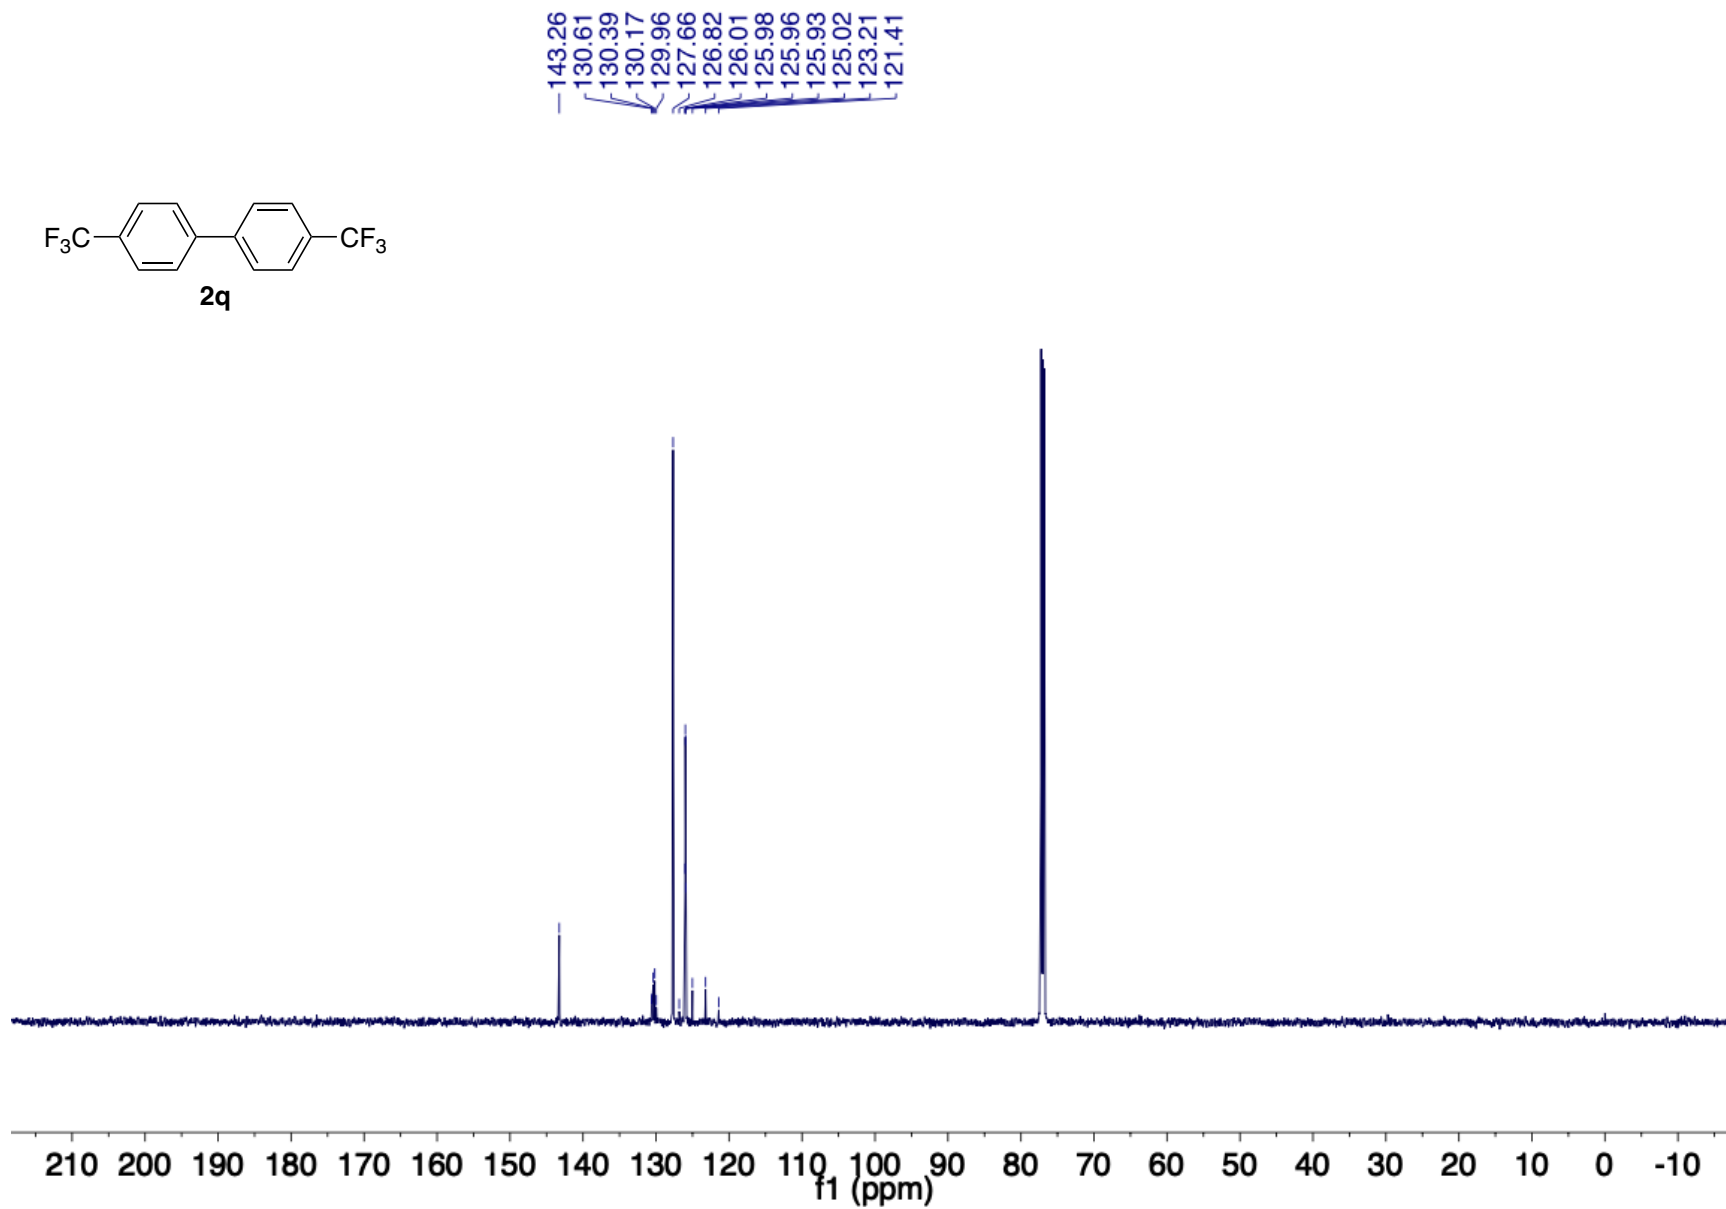

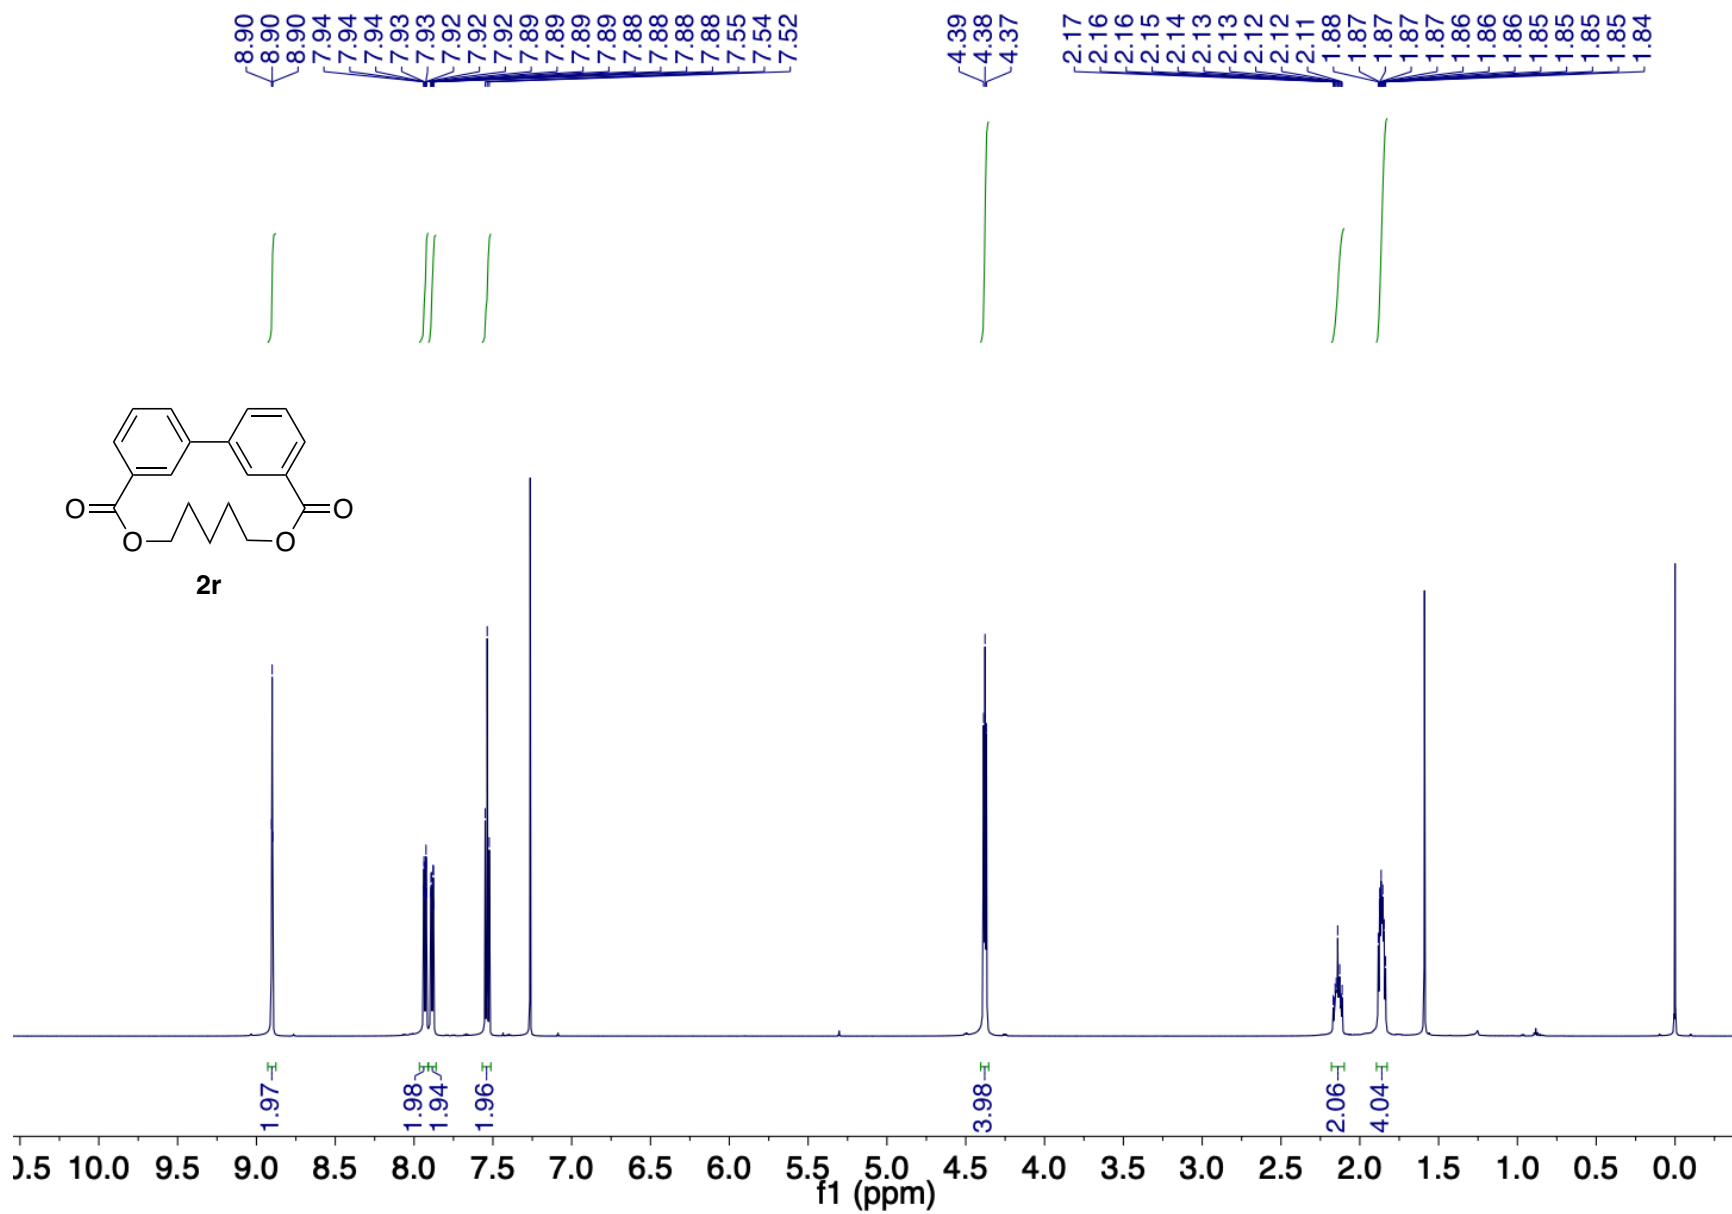

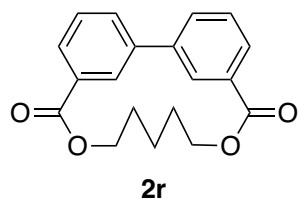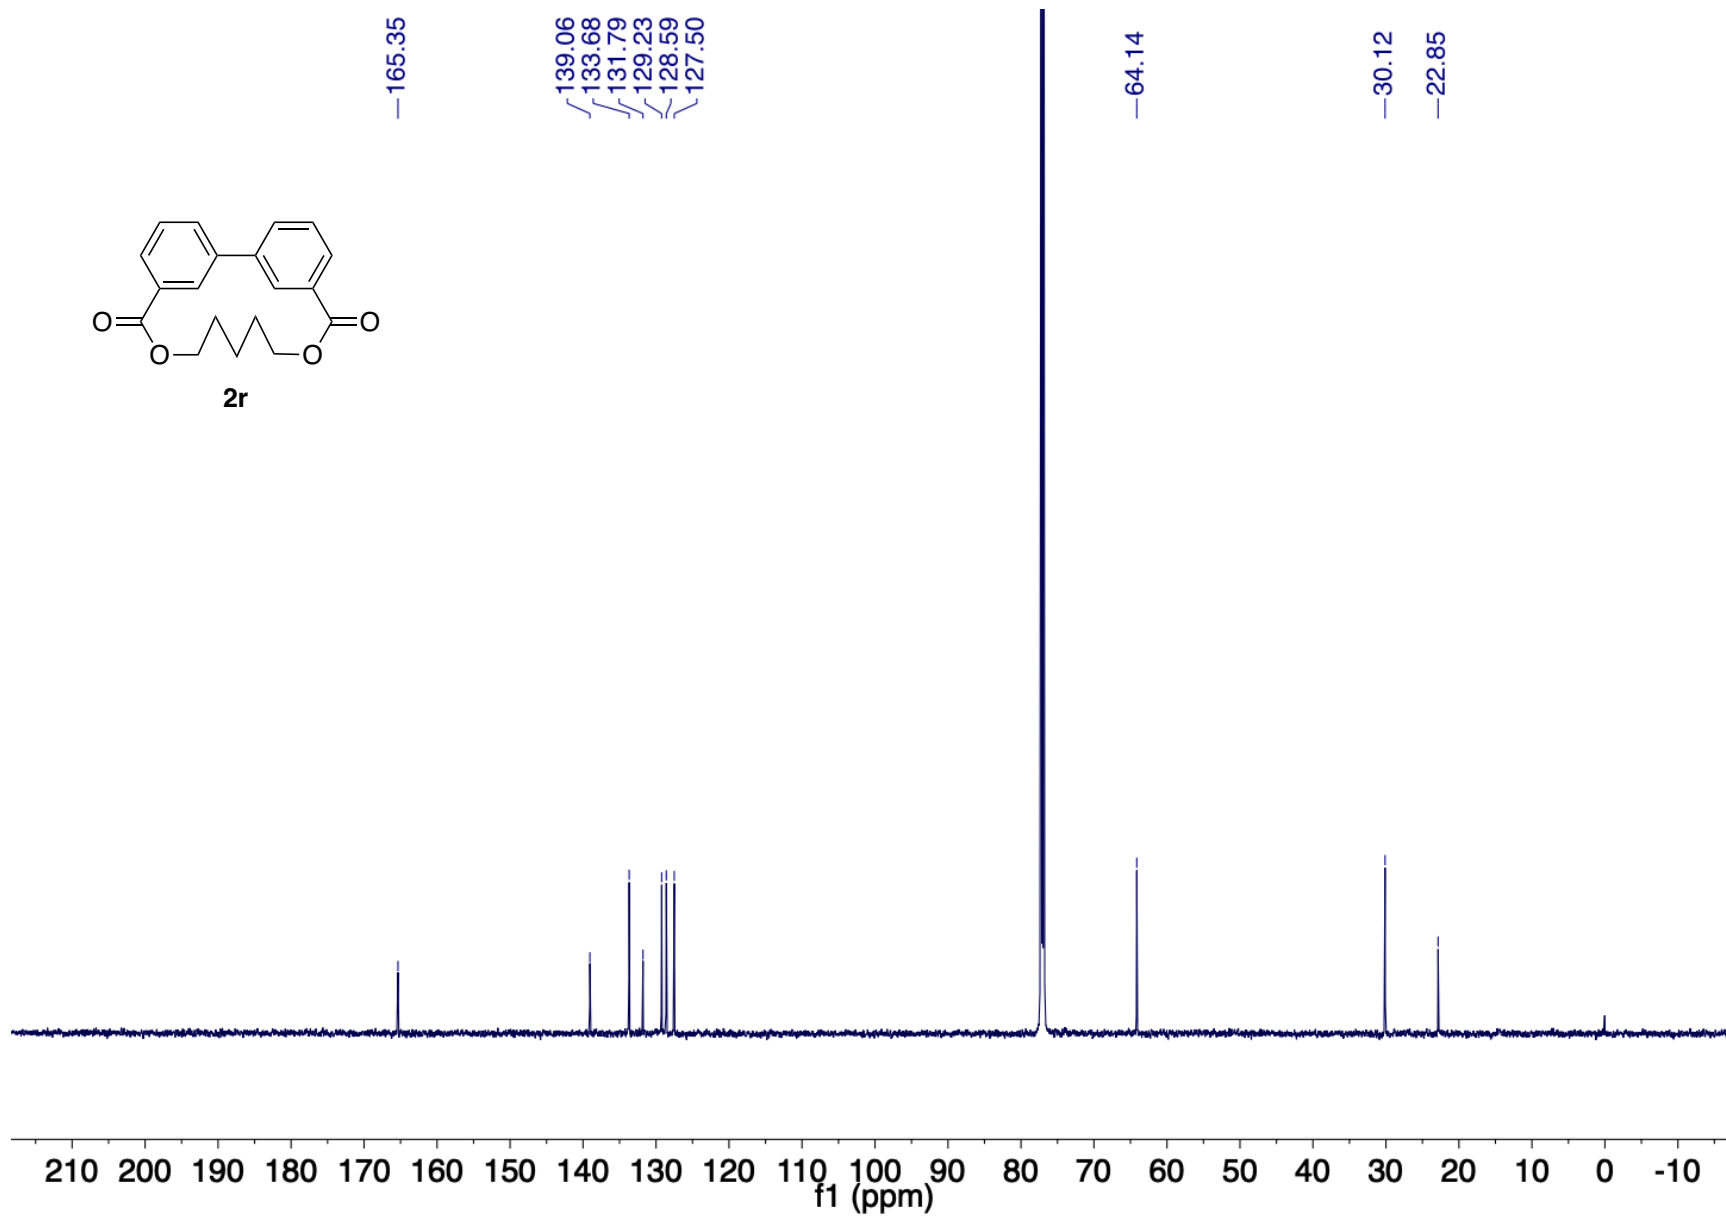

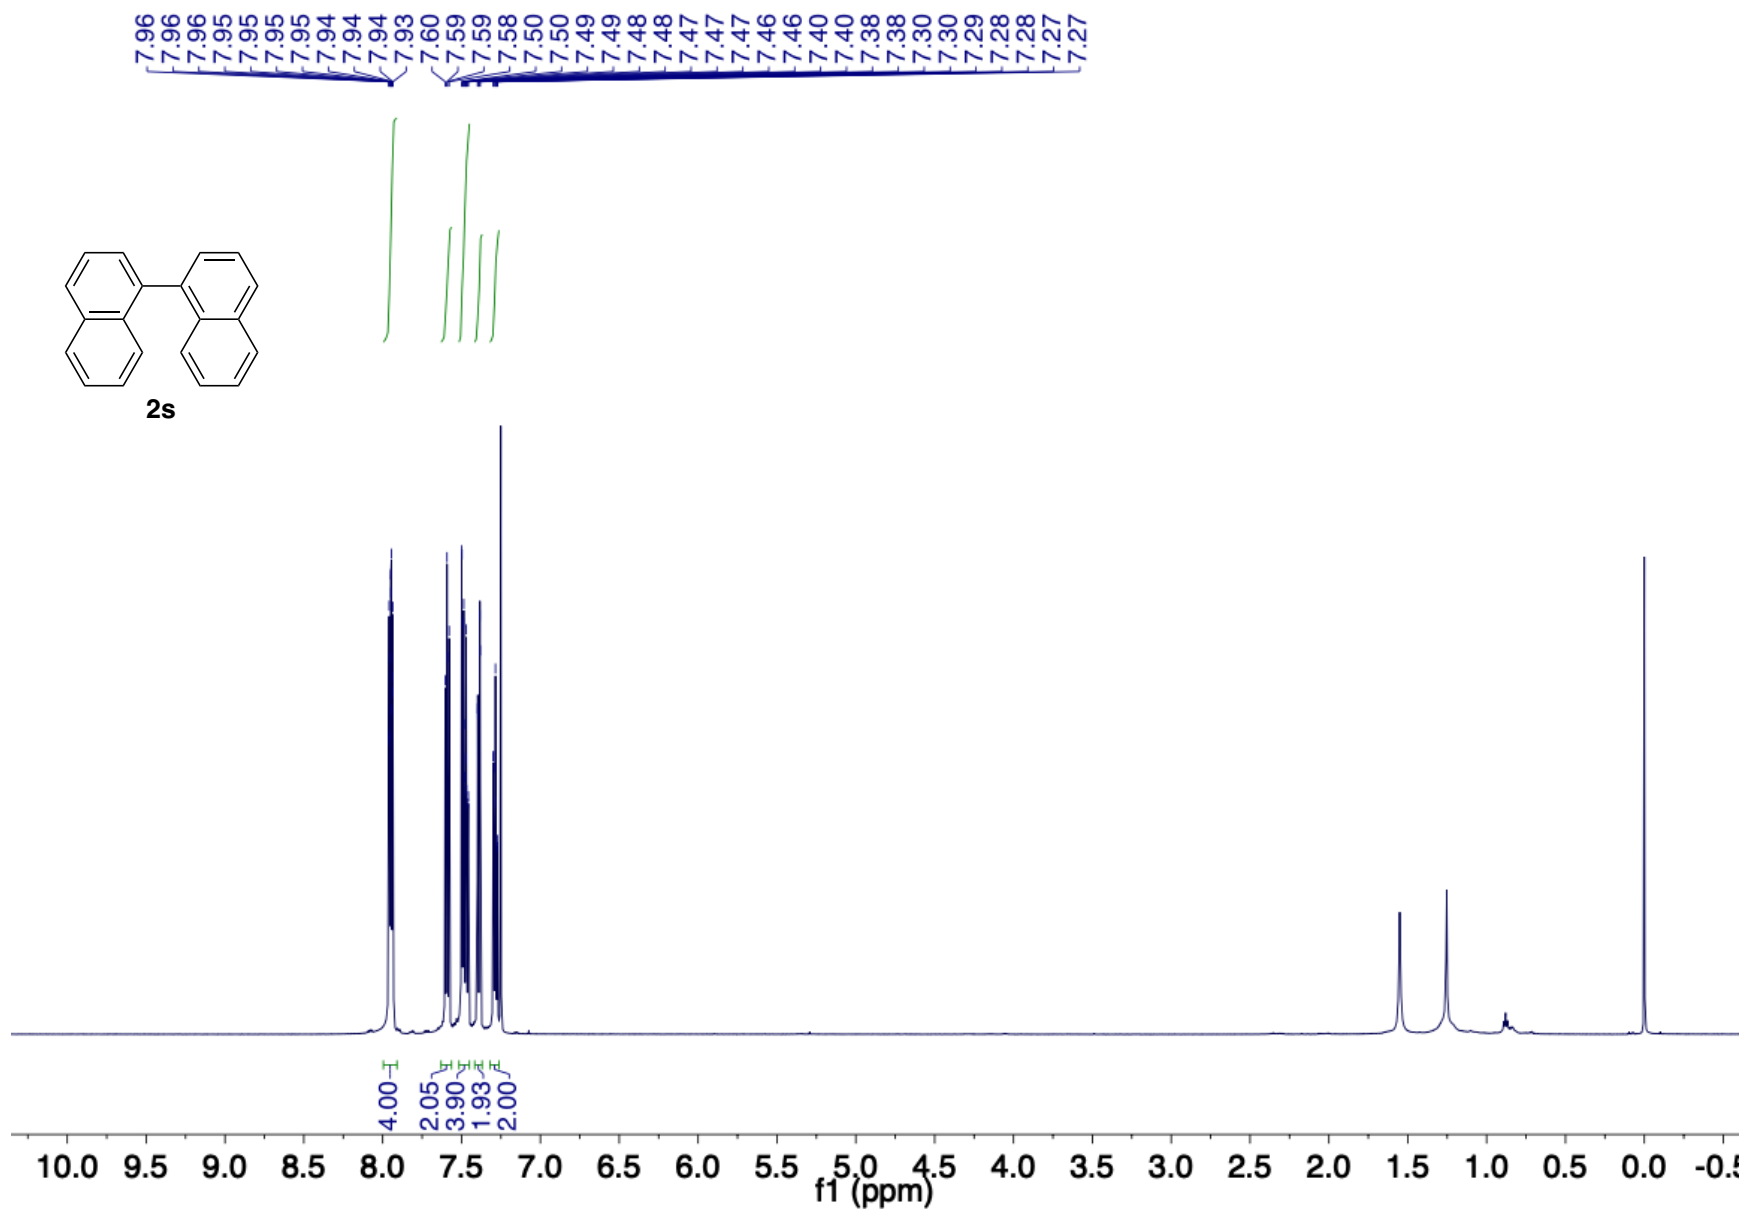

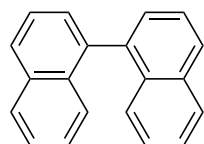

2s

138.46  
133.52  
132.85  
128.17  
127.91  
127.85  
126.58  
126.00  
125.83  
125.41

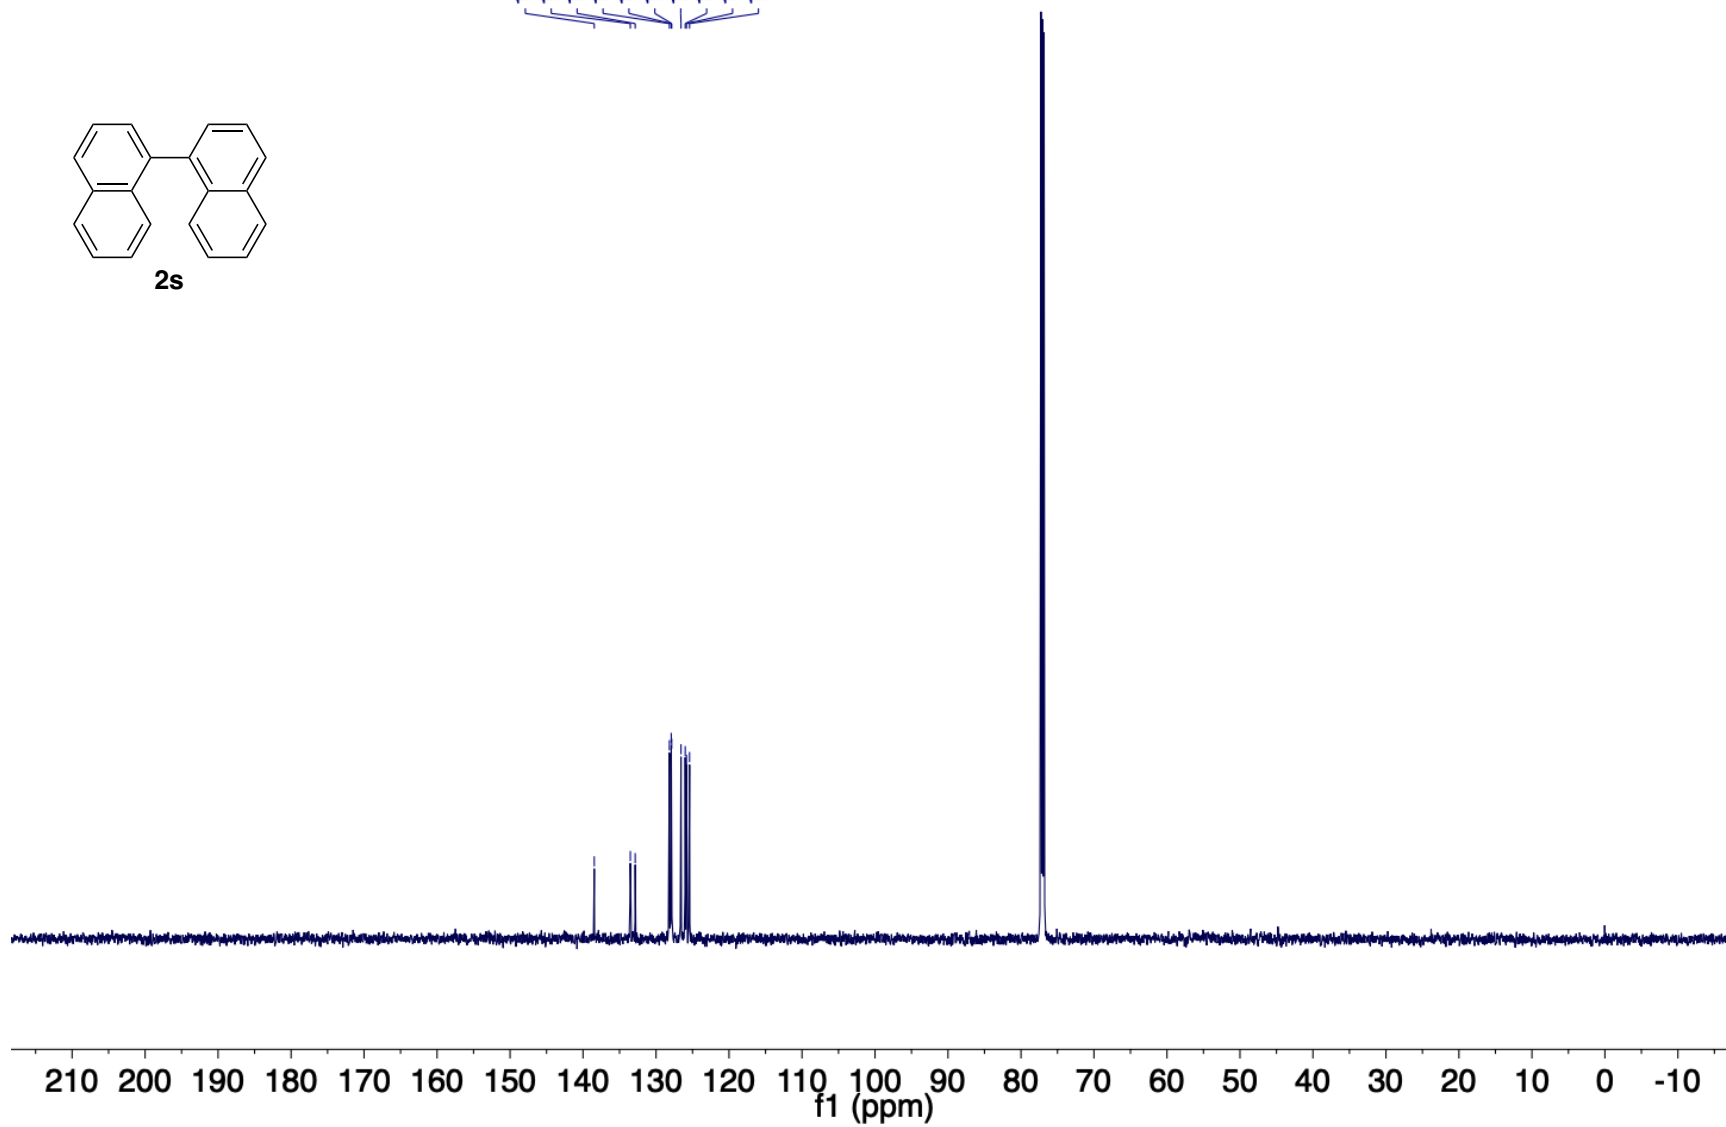



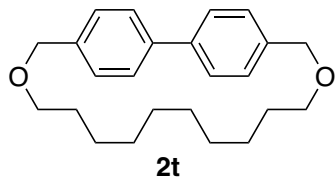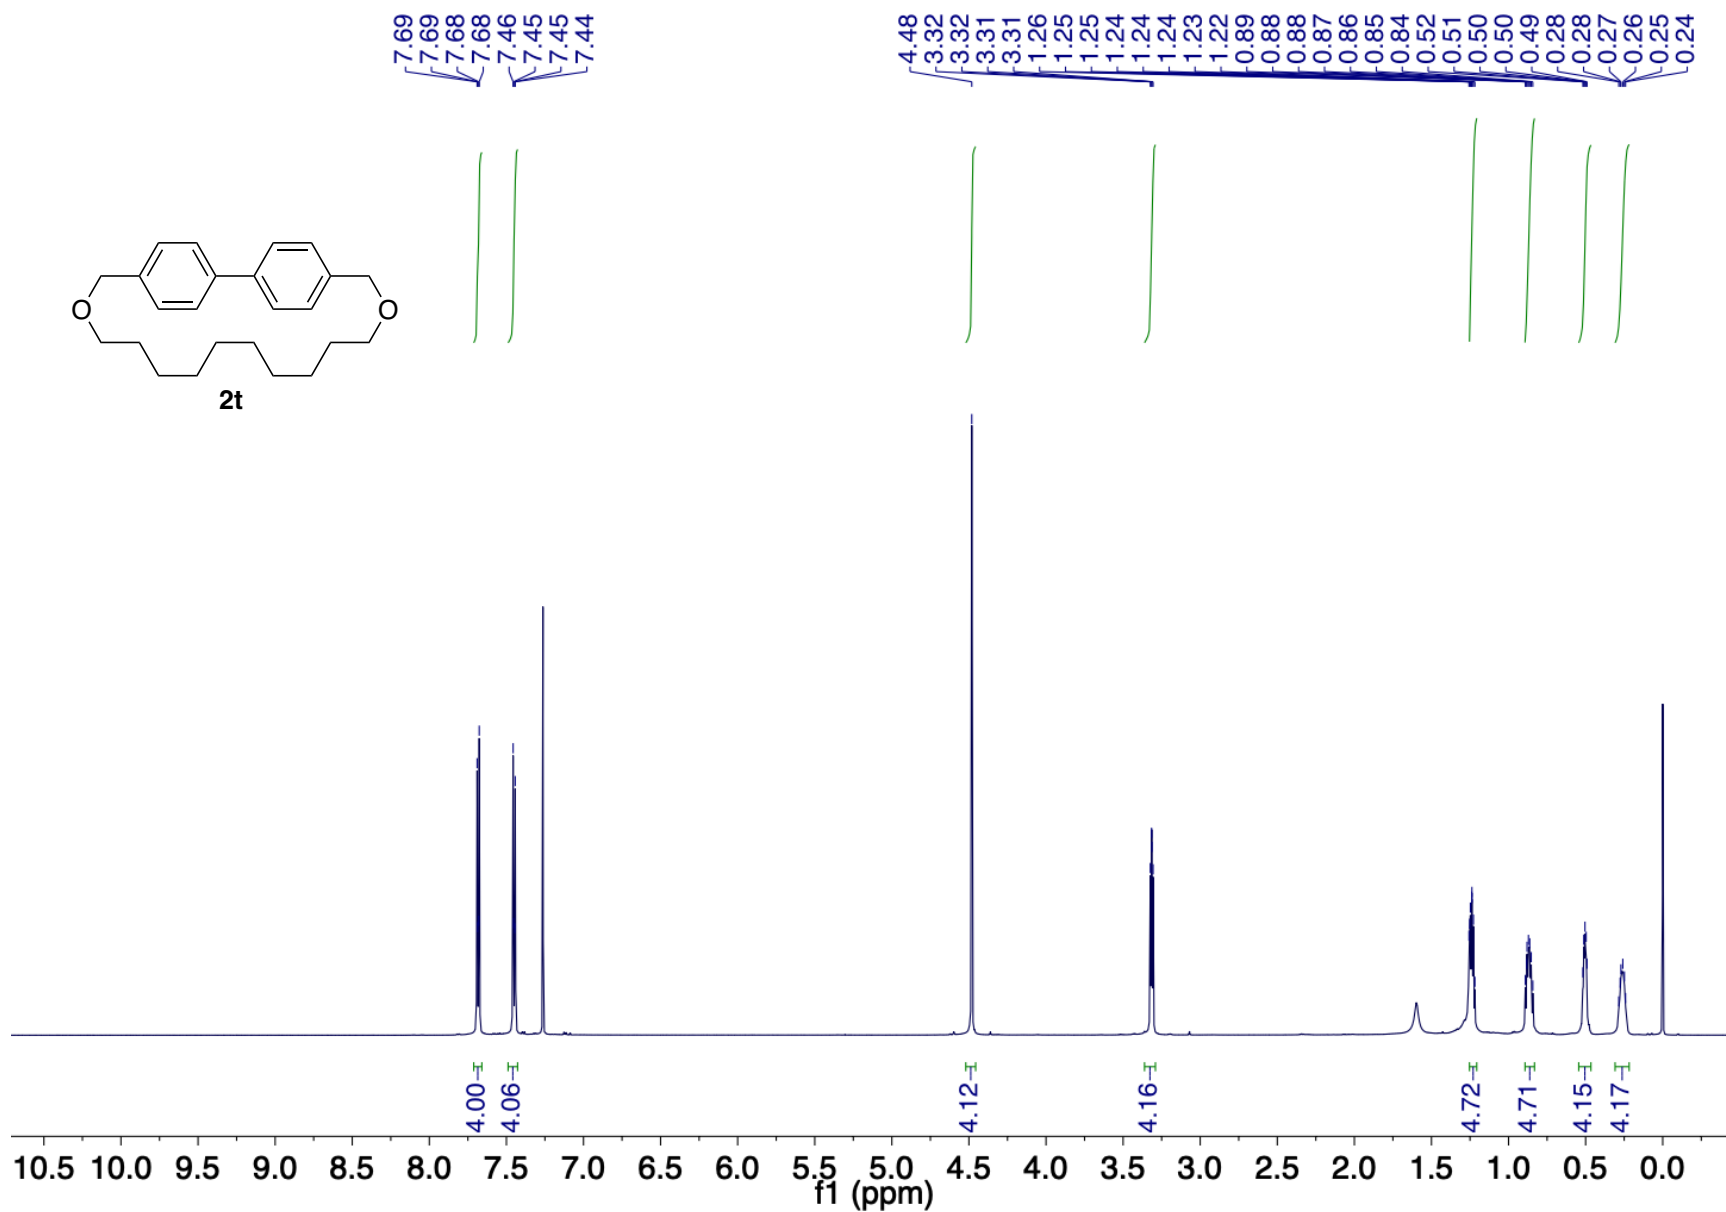

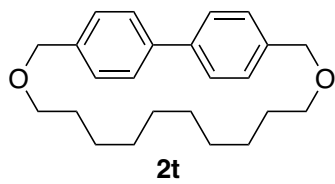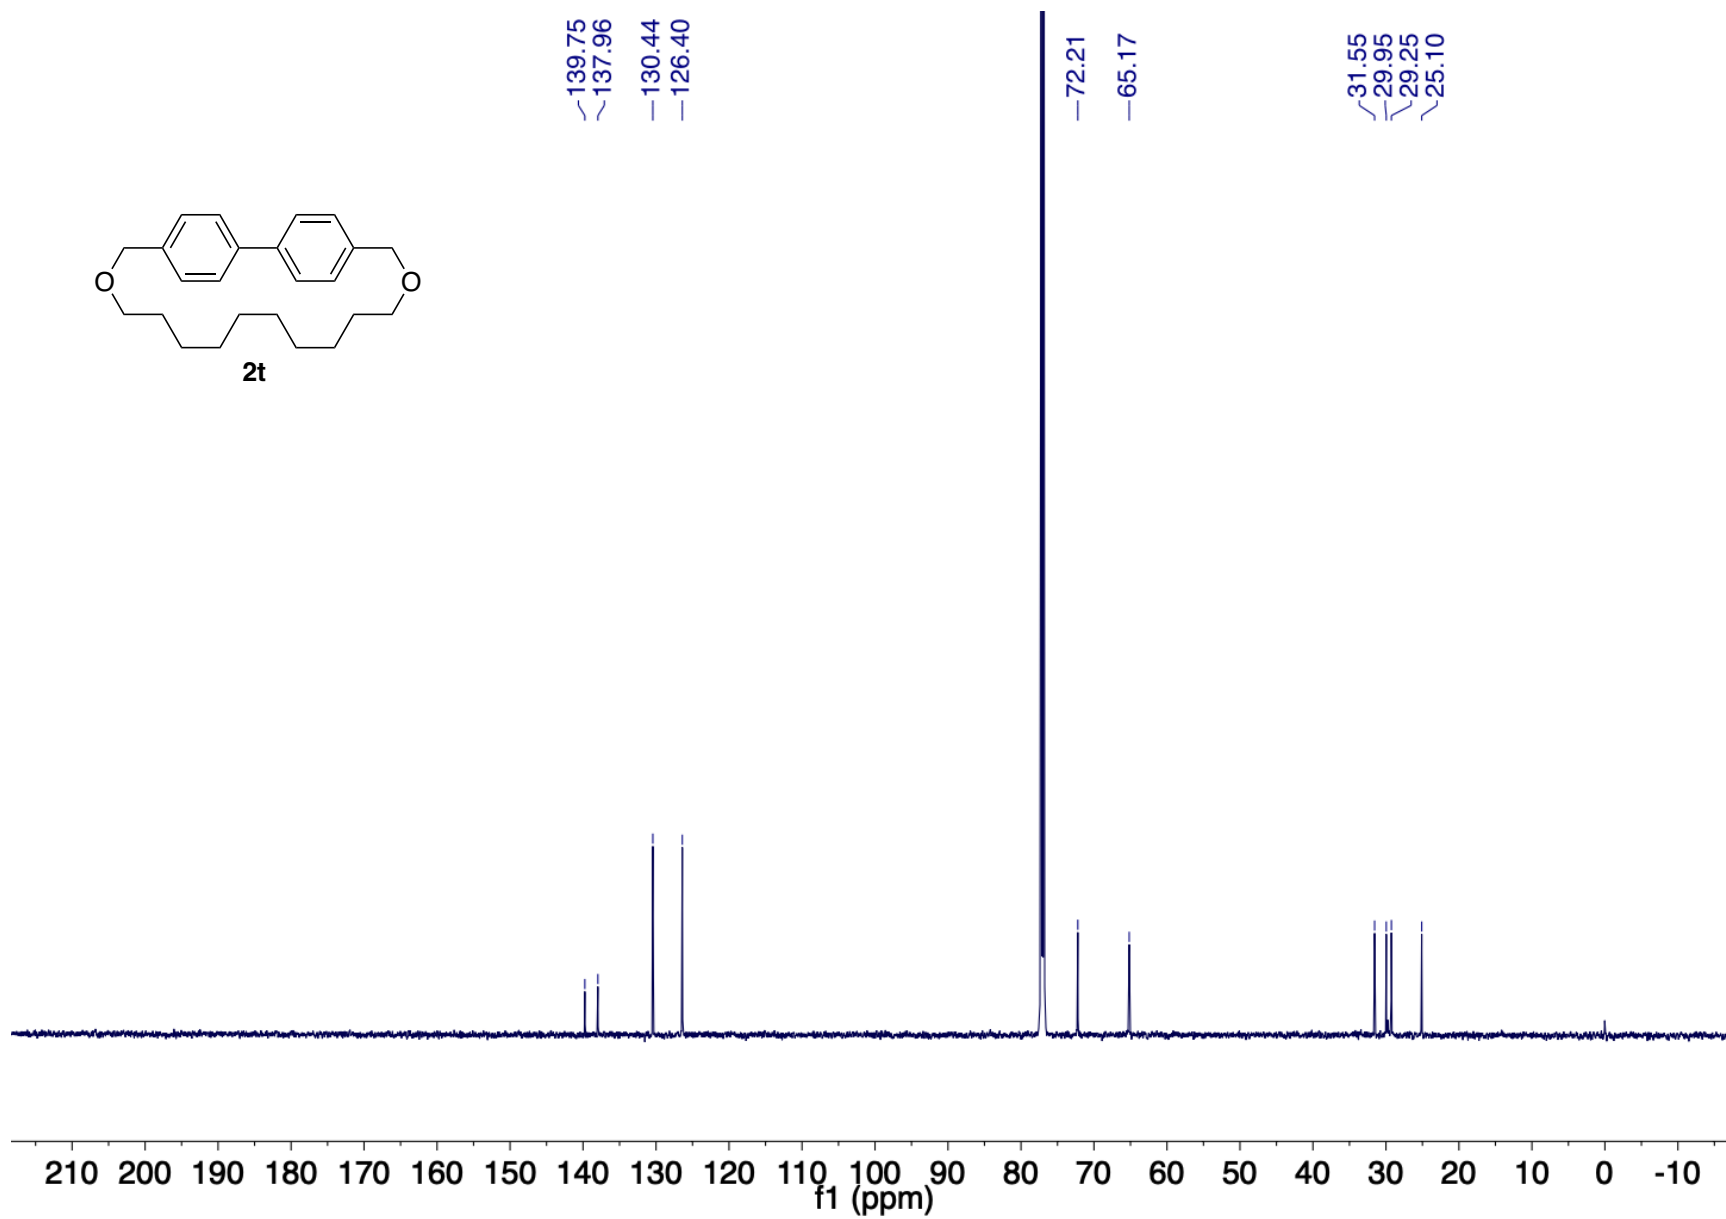

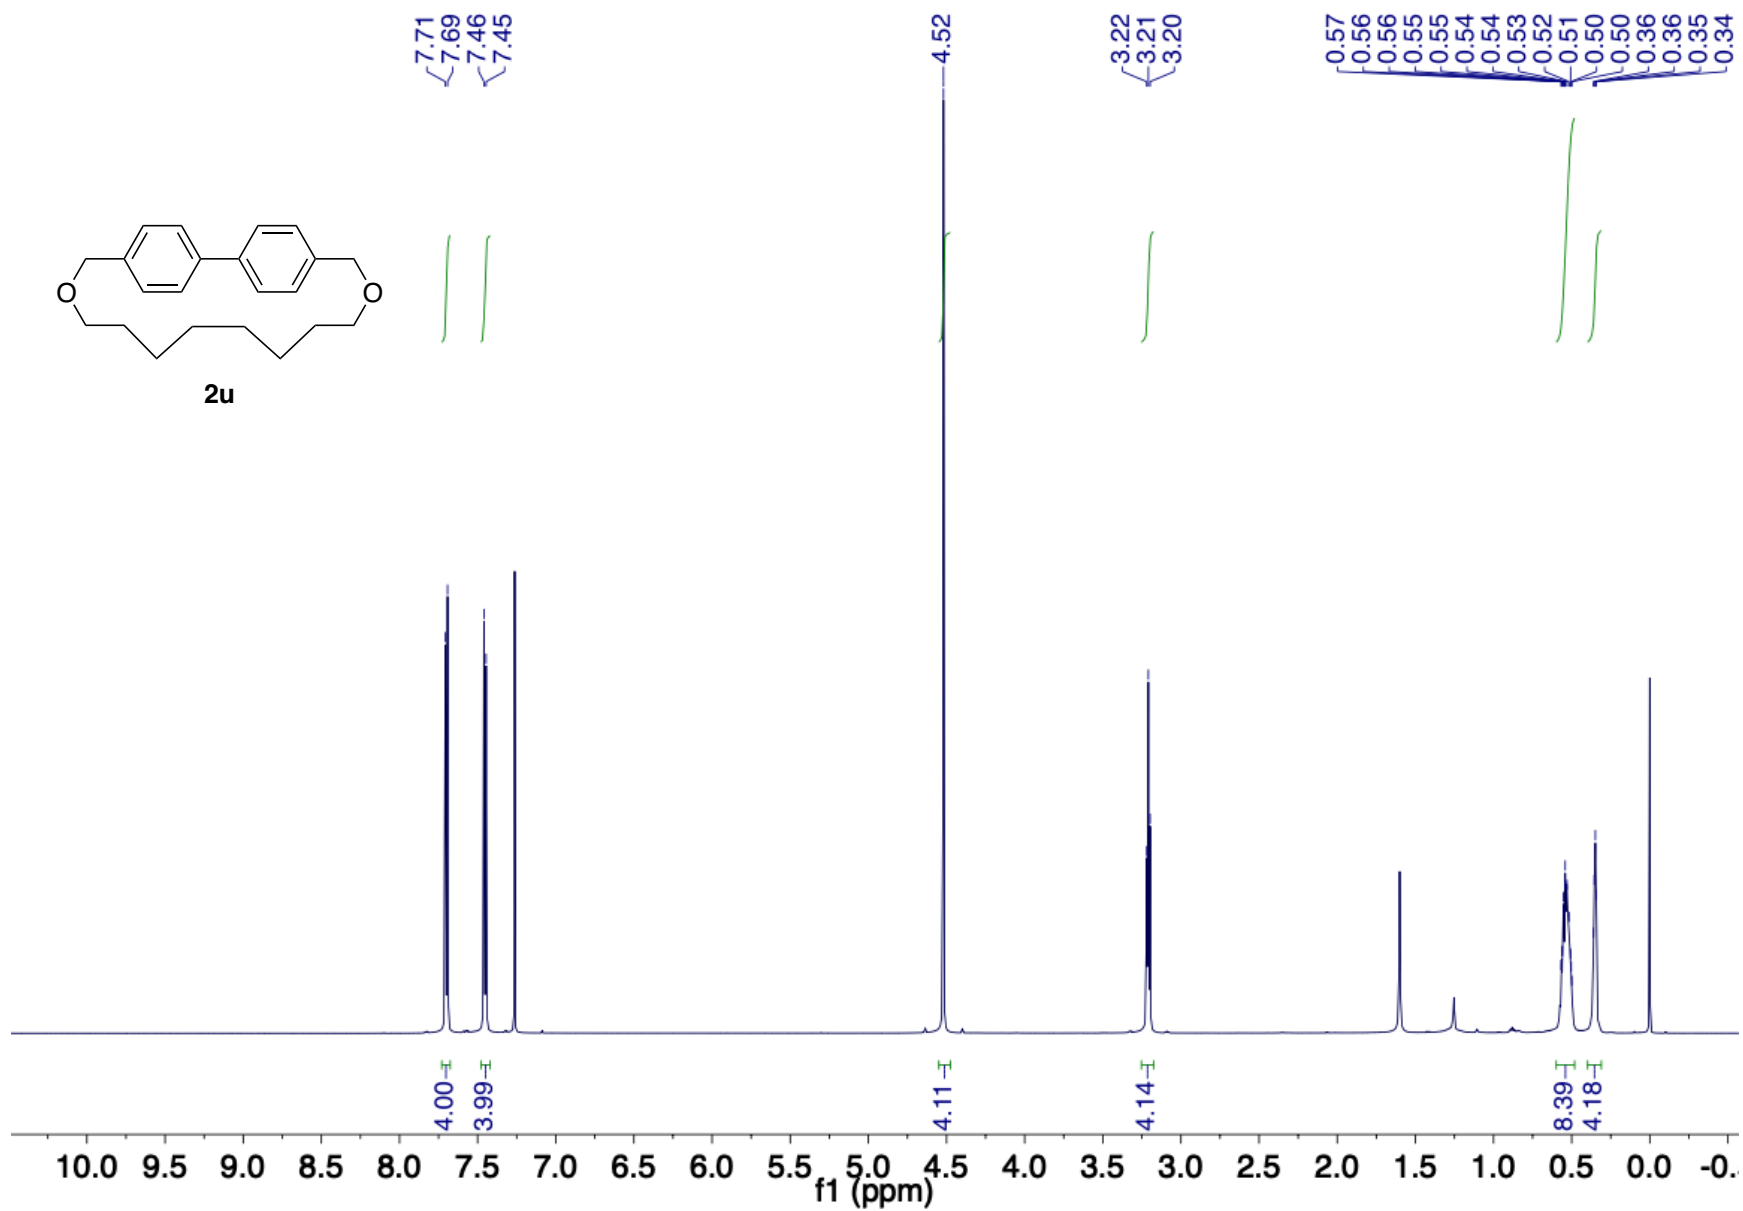

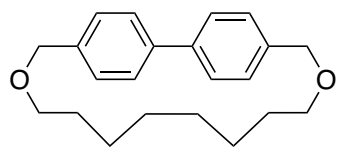

2u

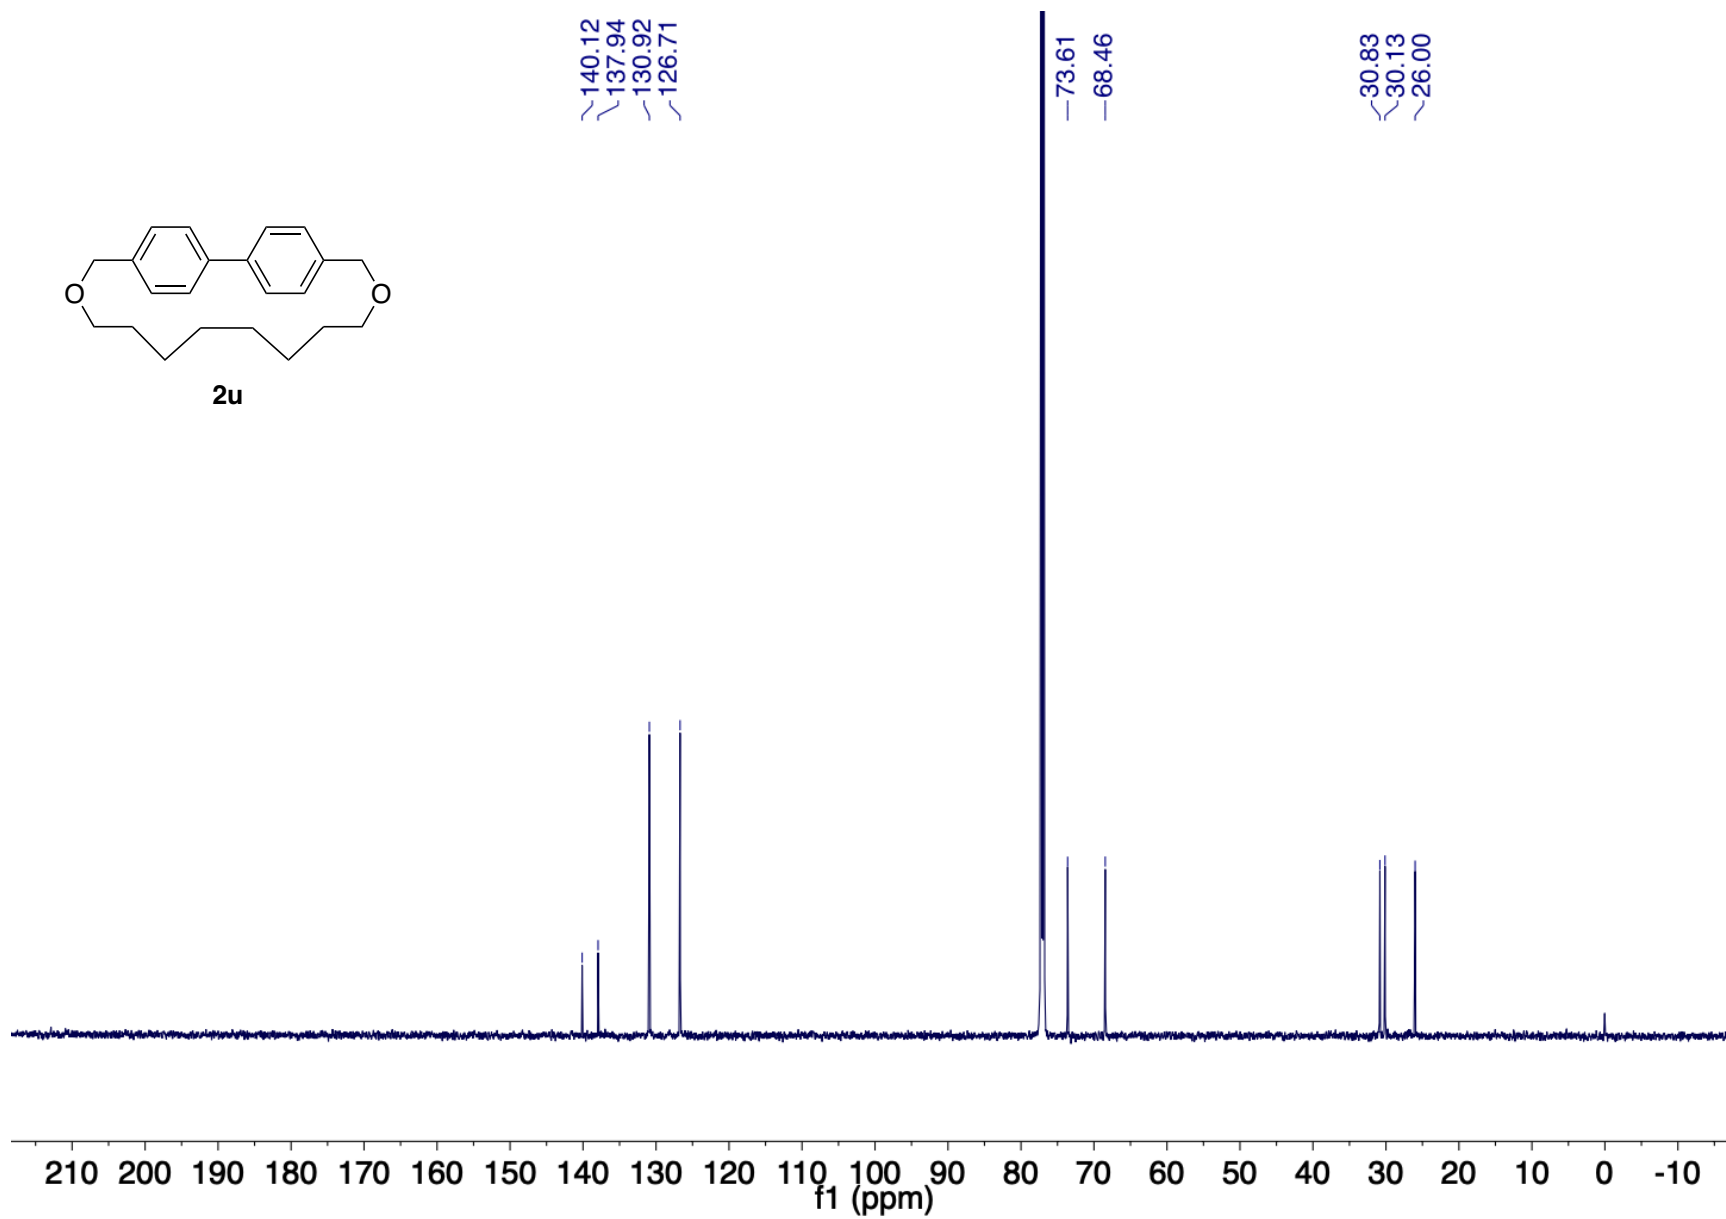

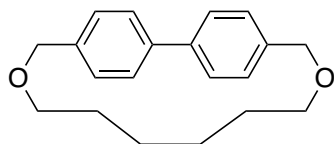

2v

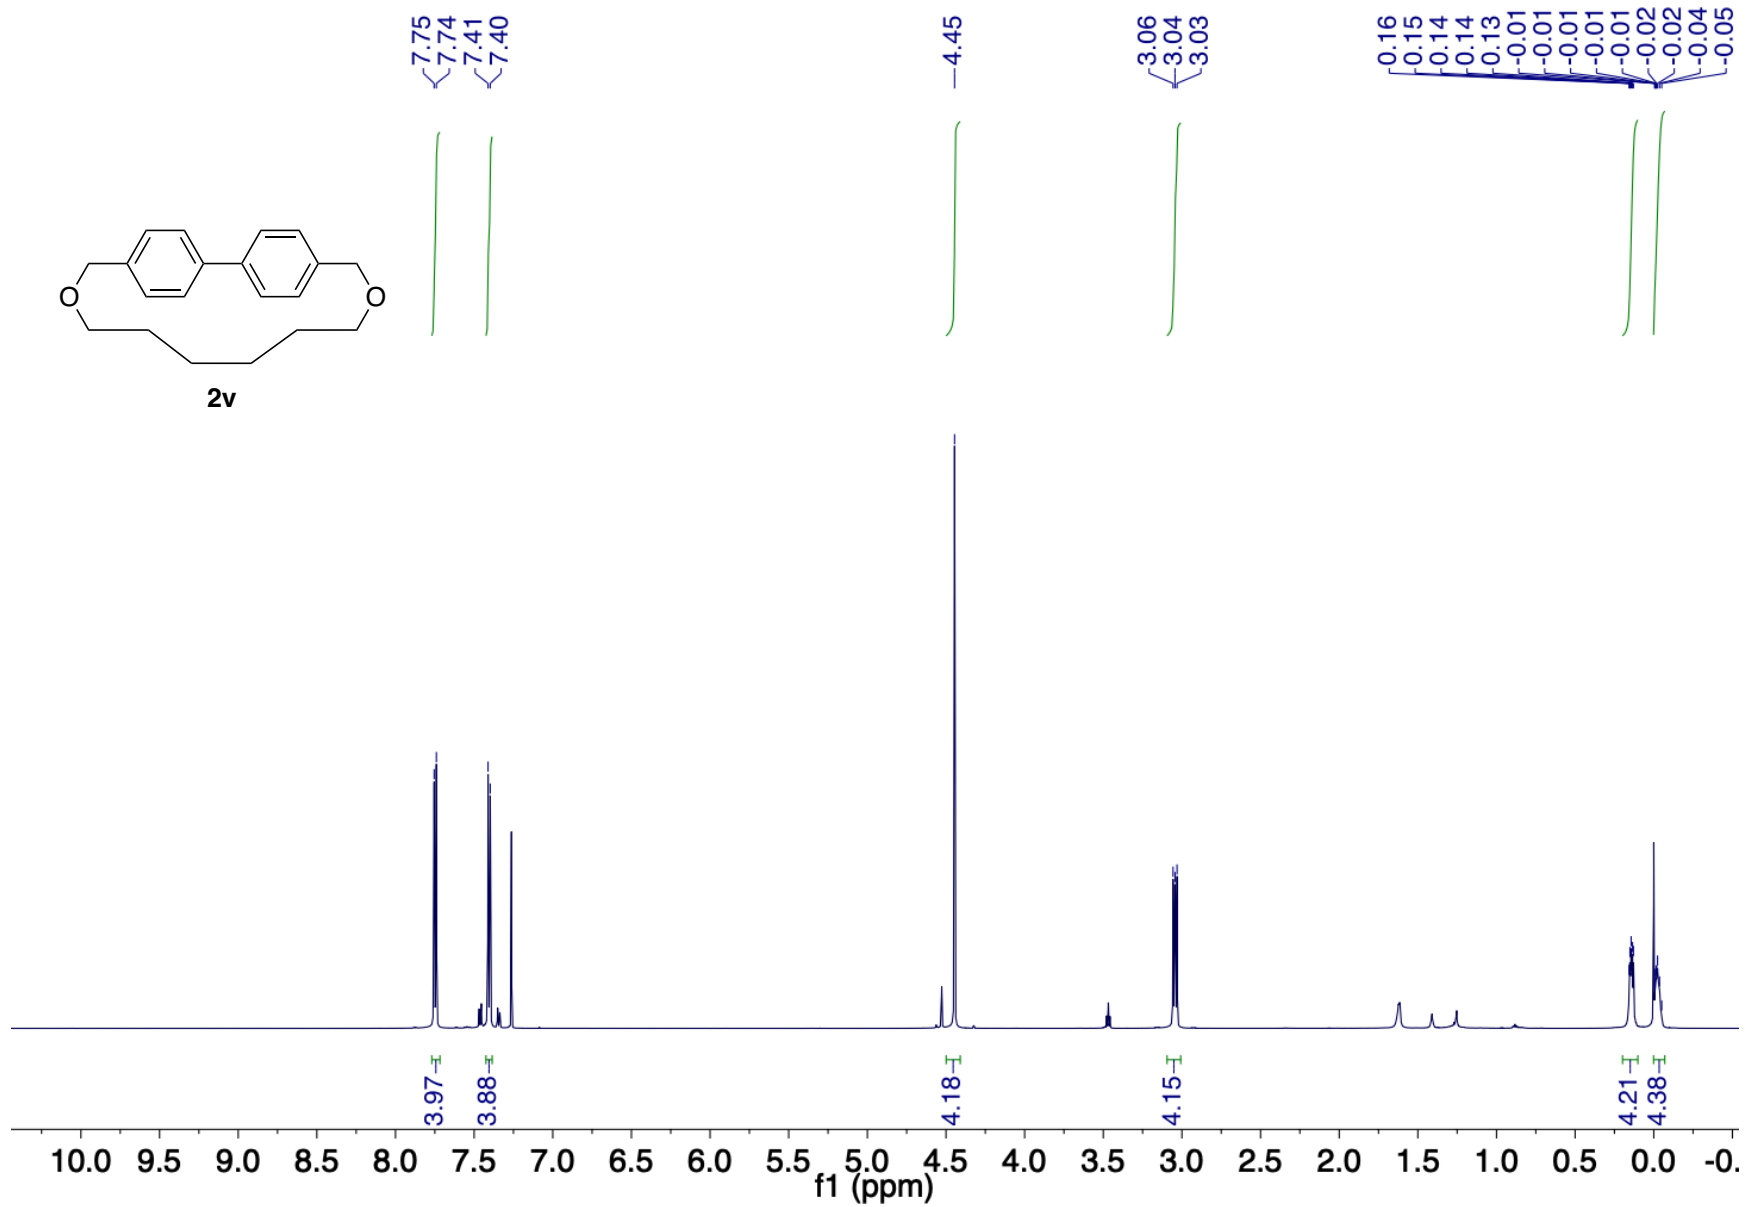

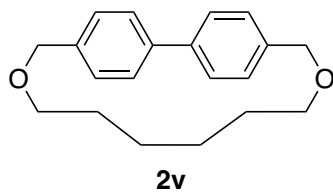

~140.23  
~136.68  
~131.27  
~126.97

-73.85  
-68.47

-31.01  
-25.96

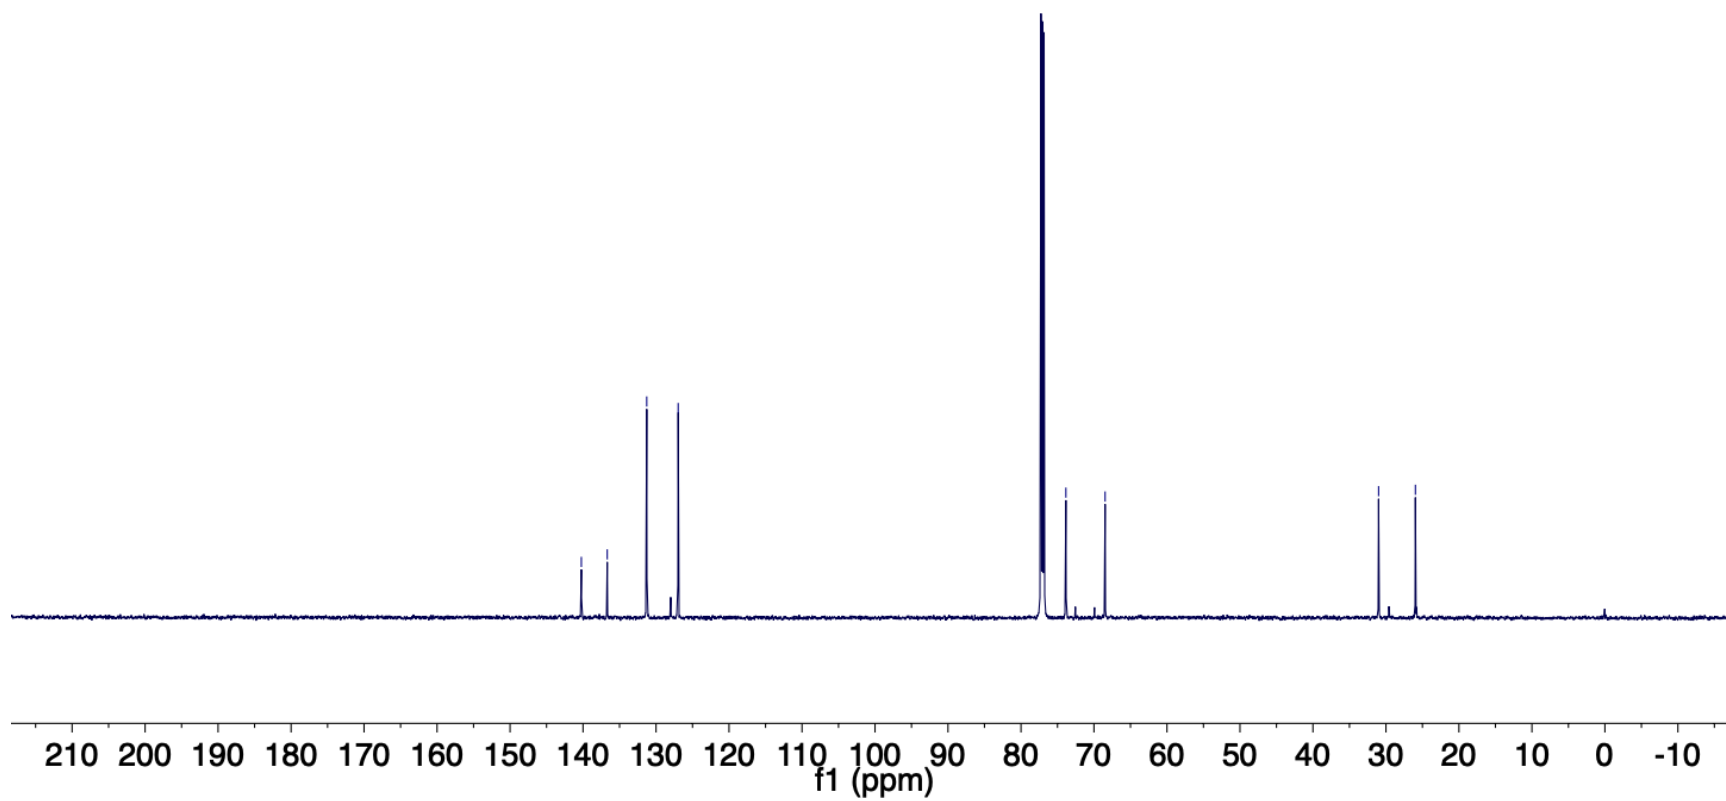

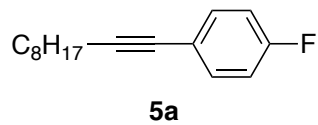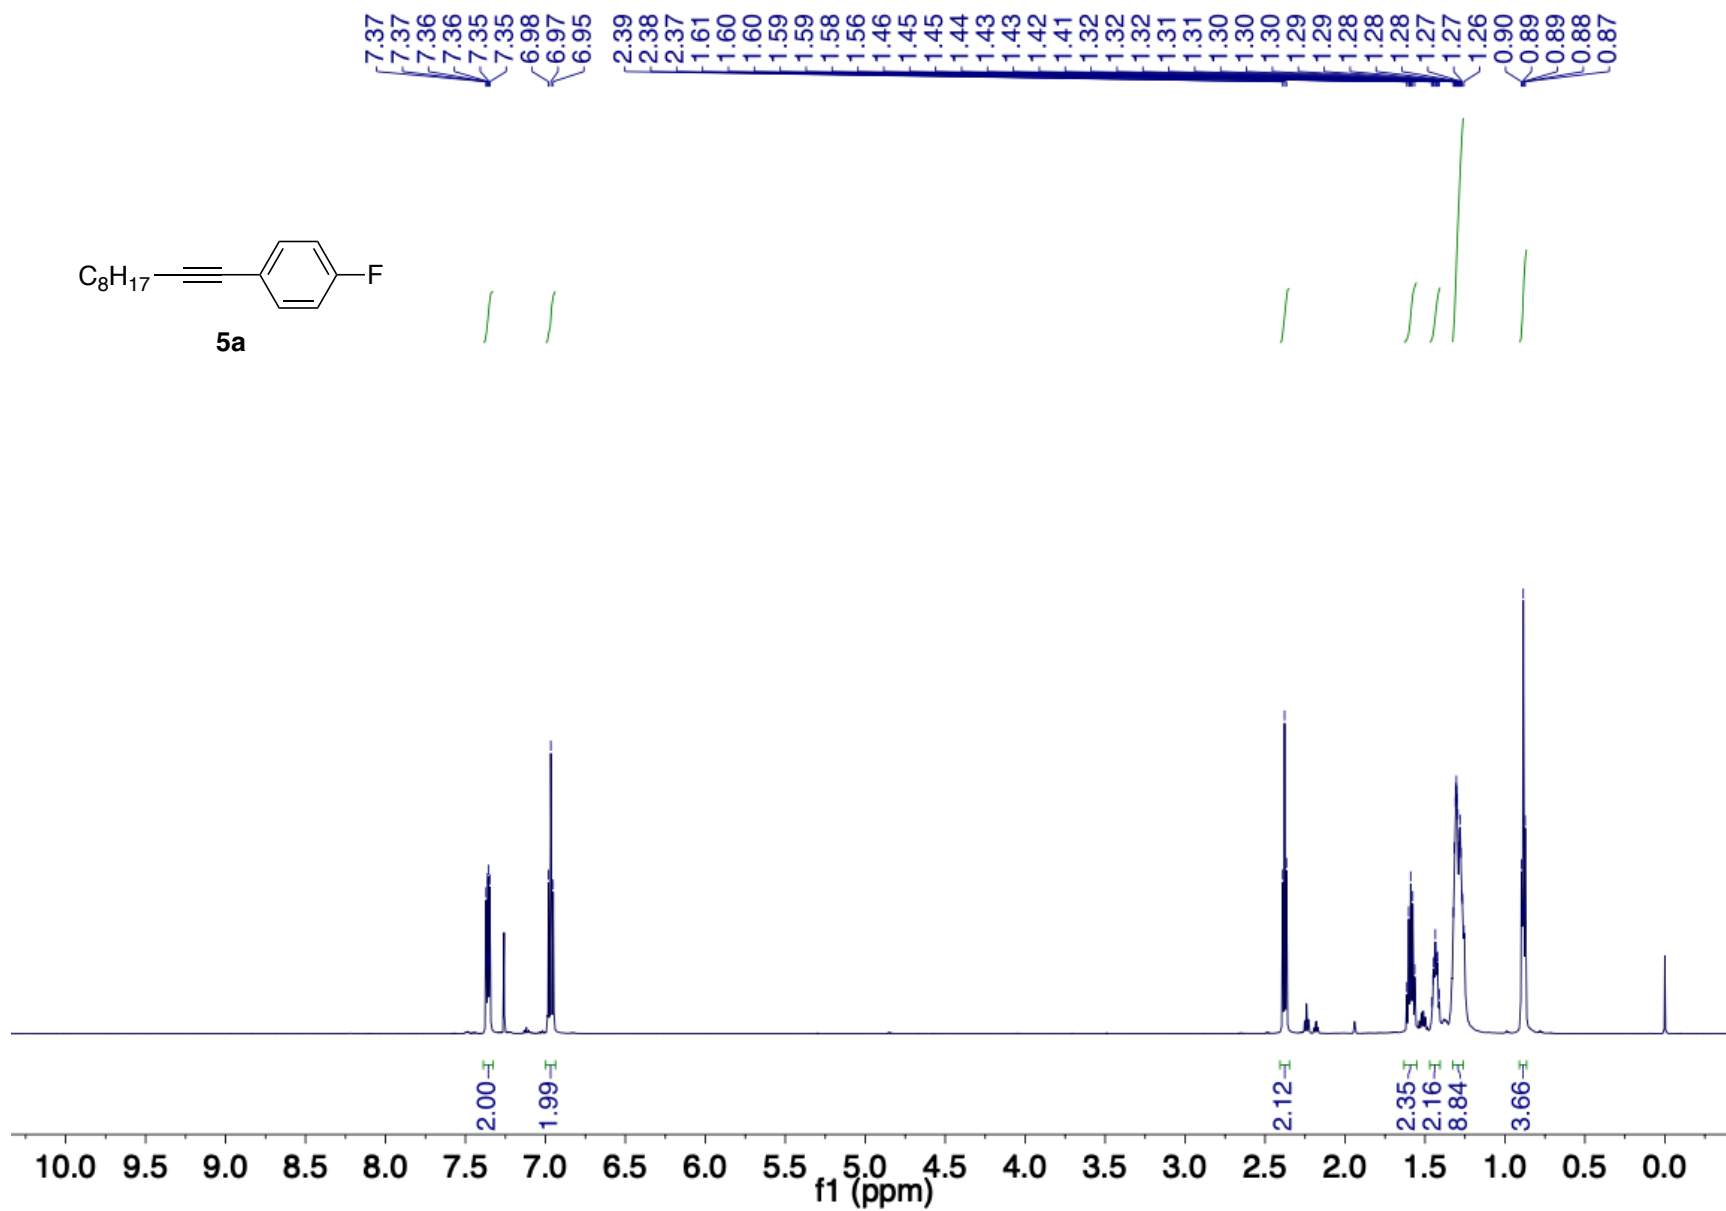

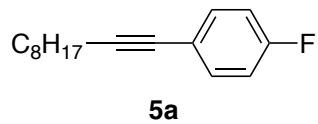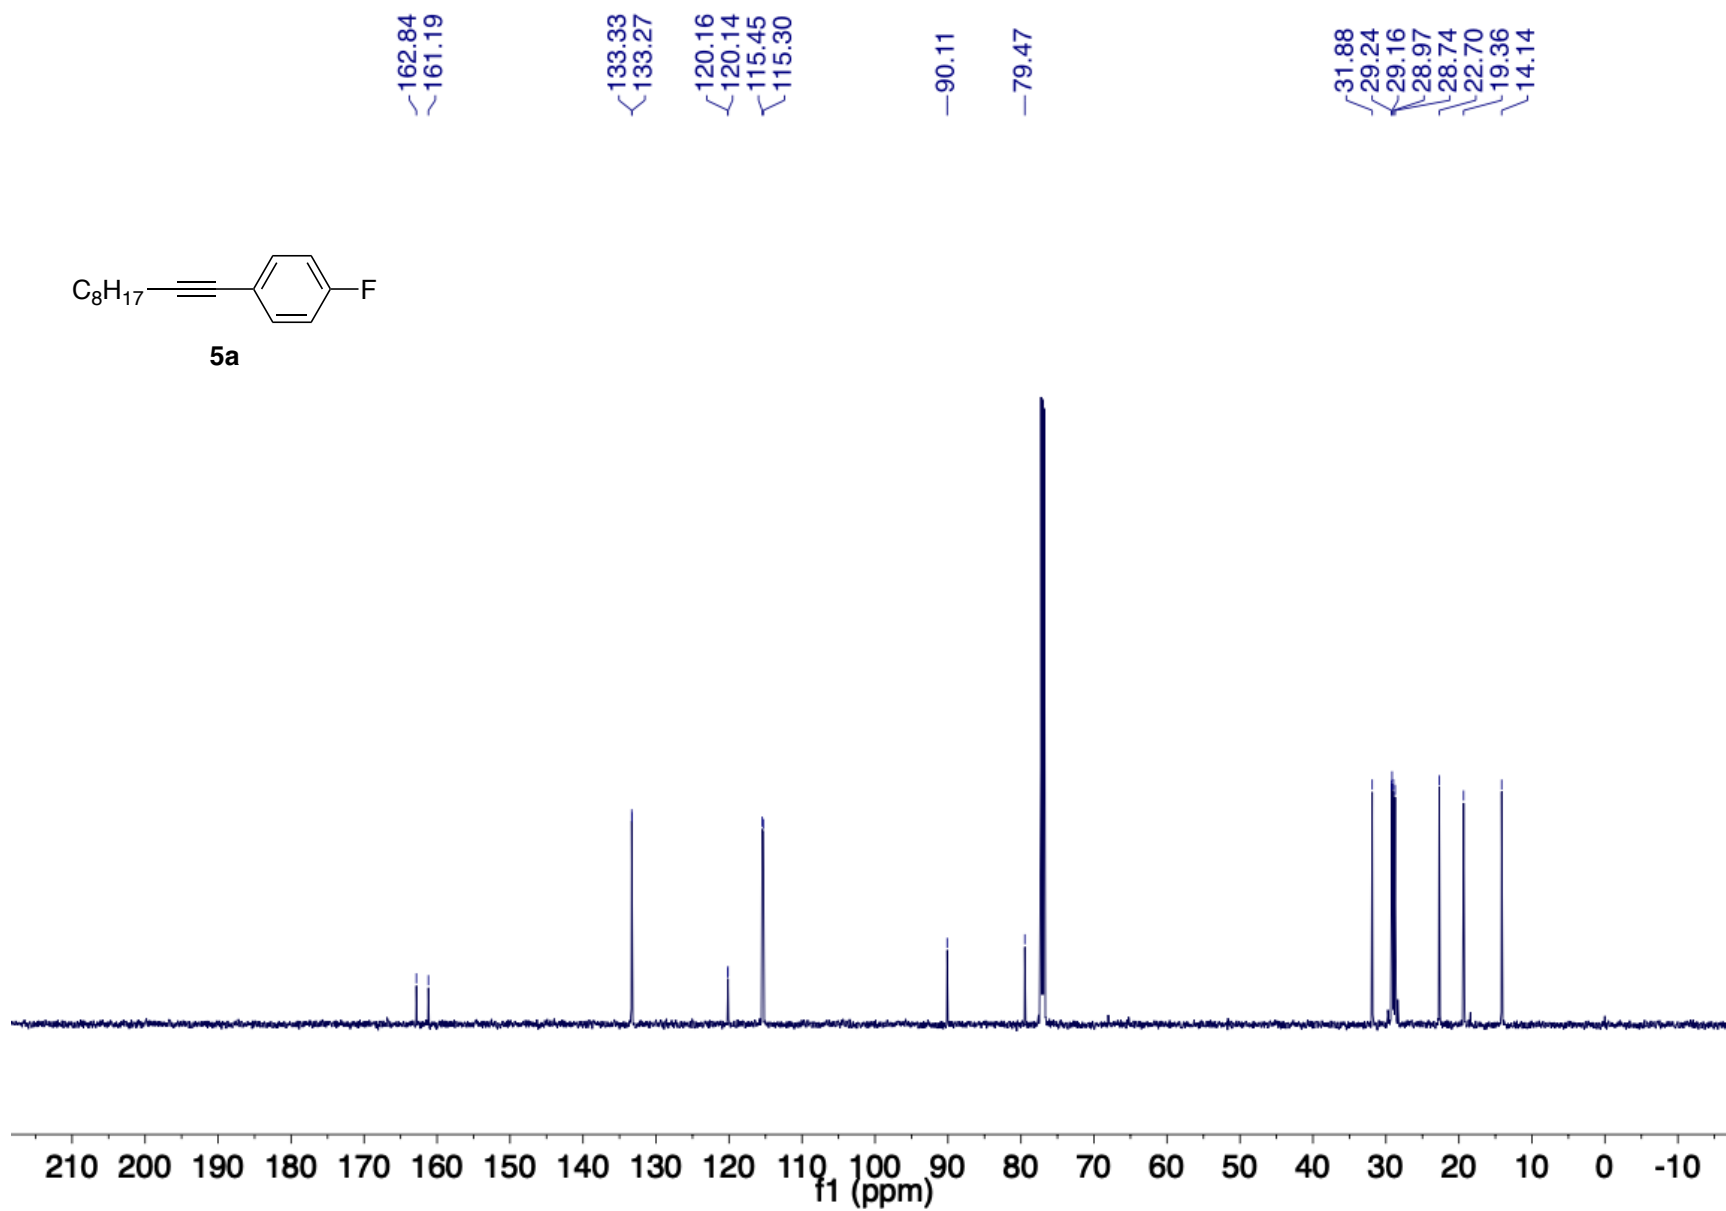



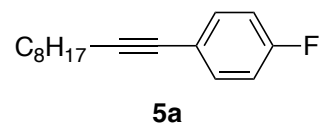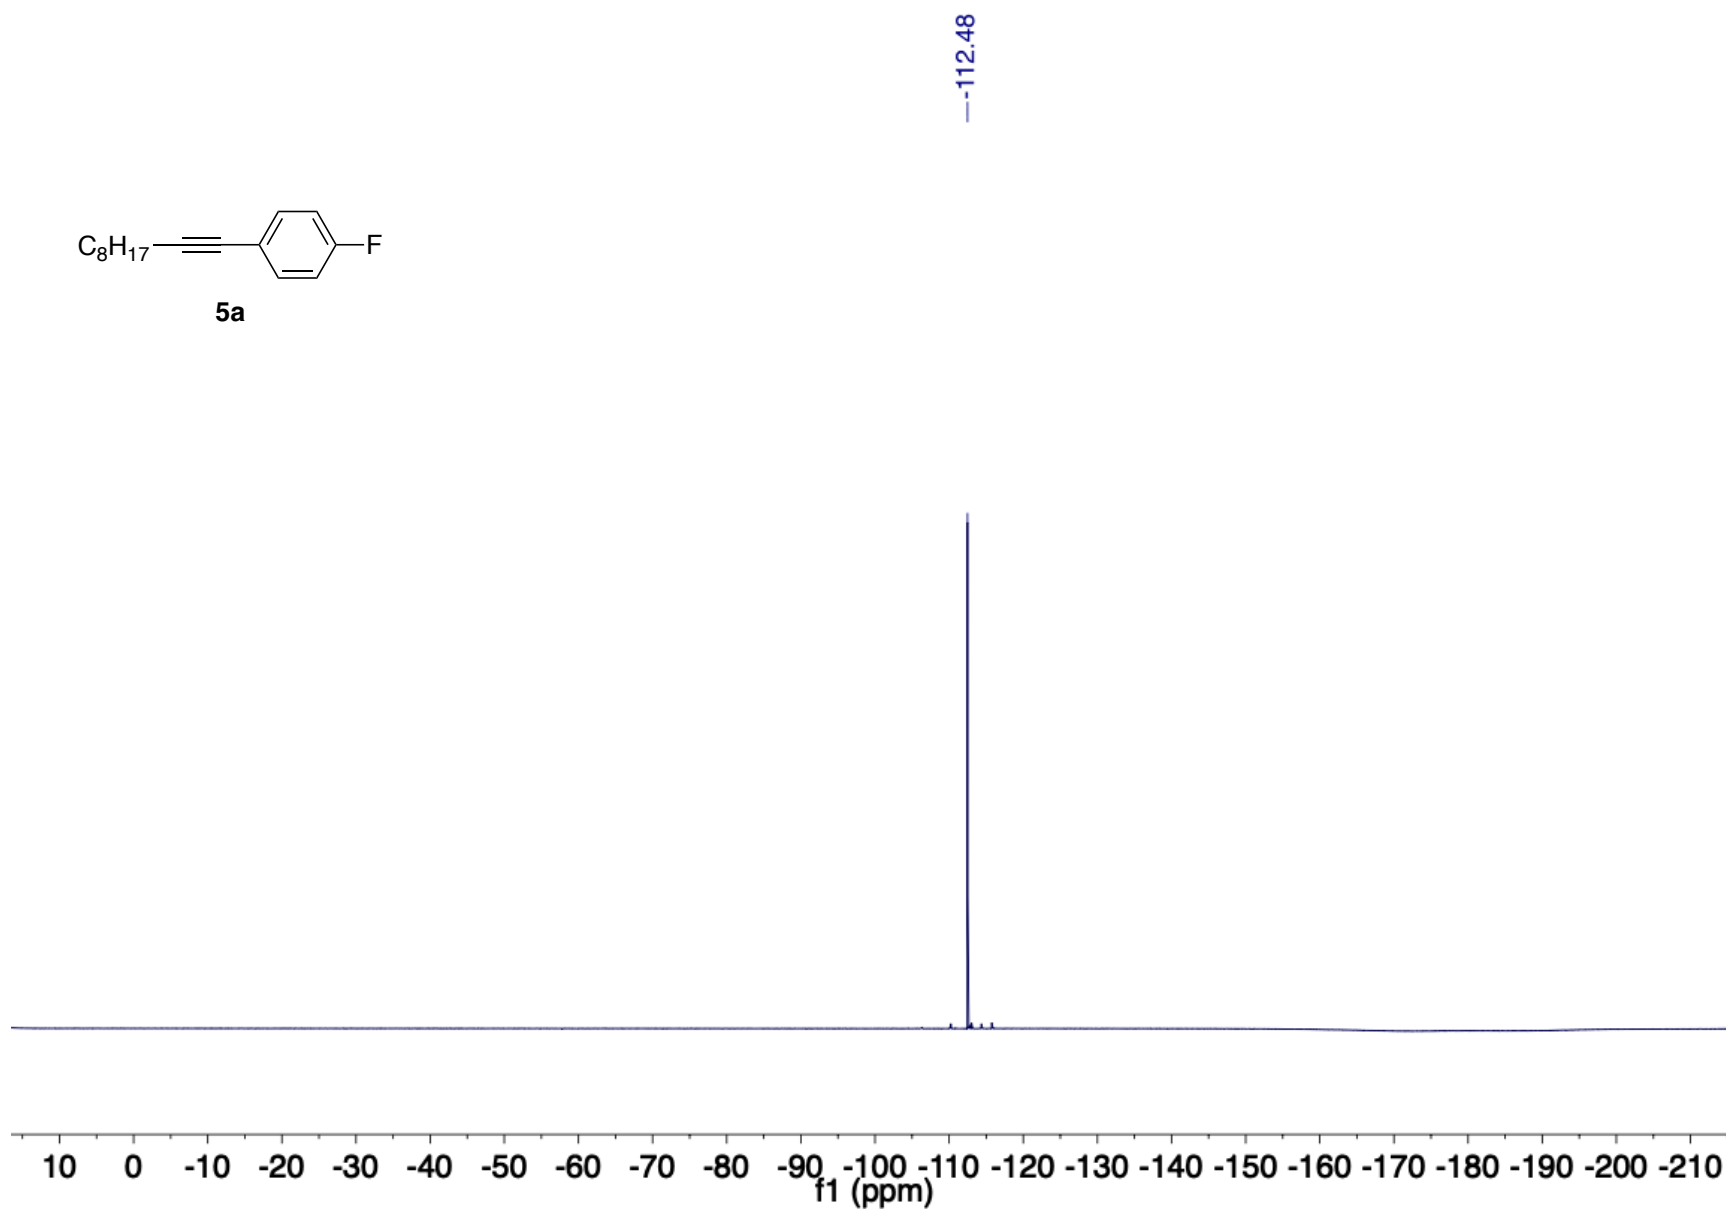

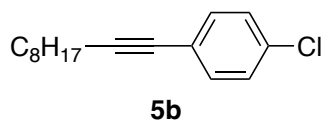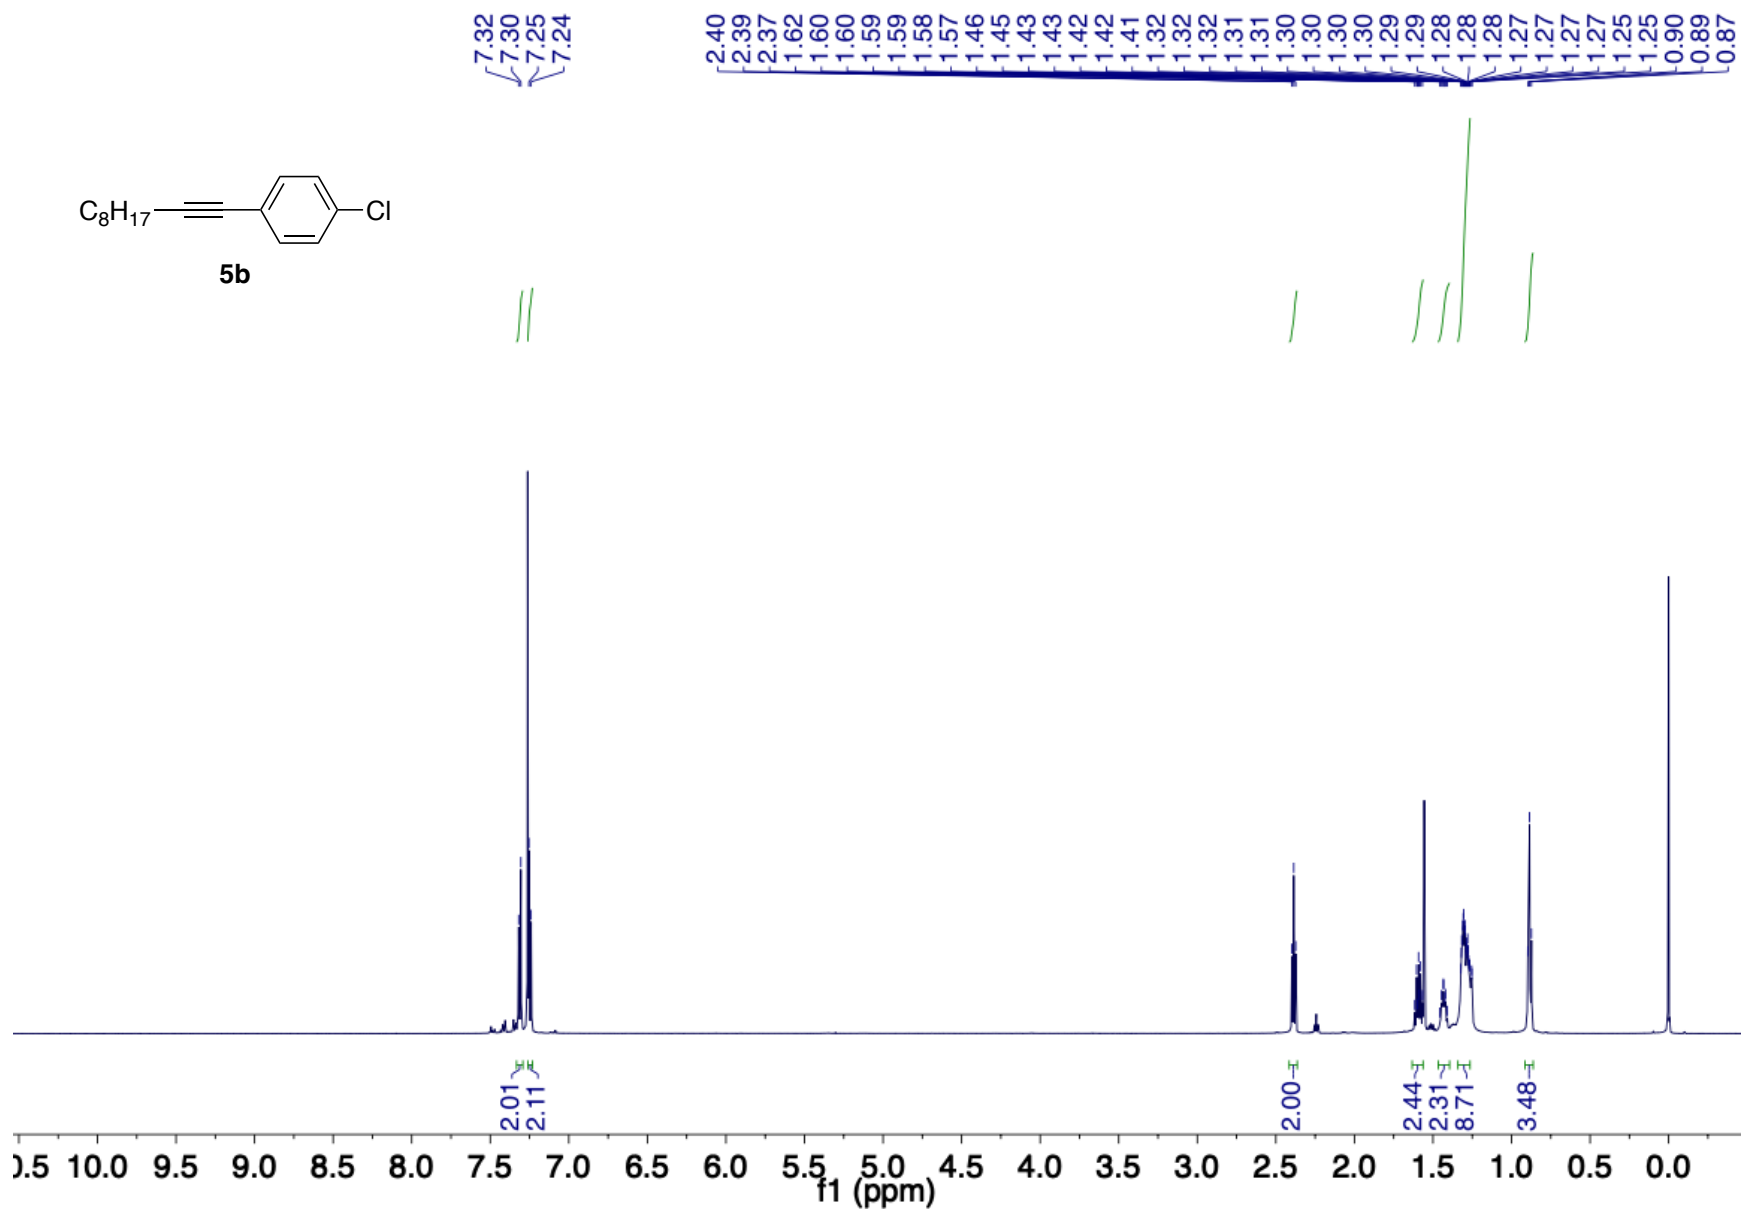

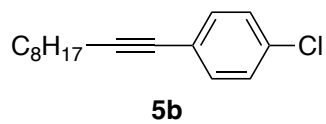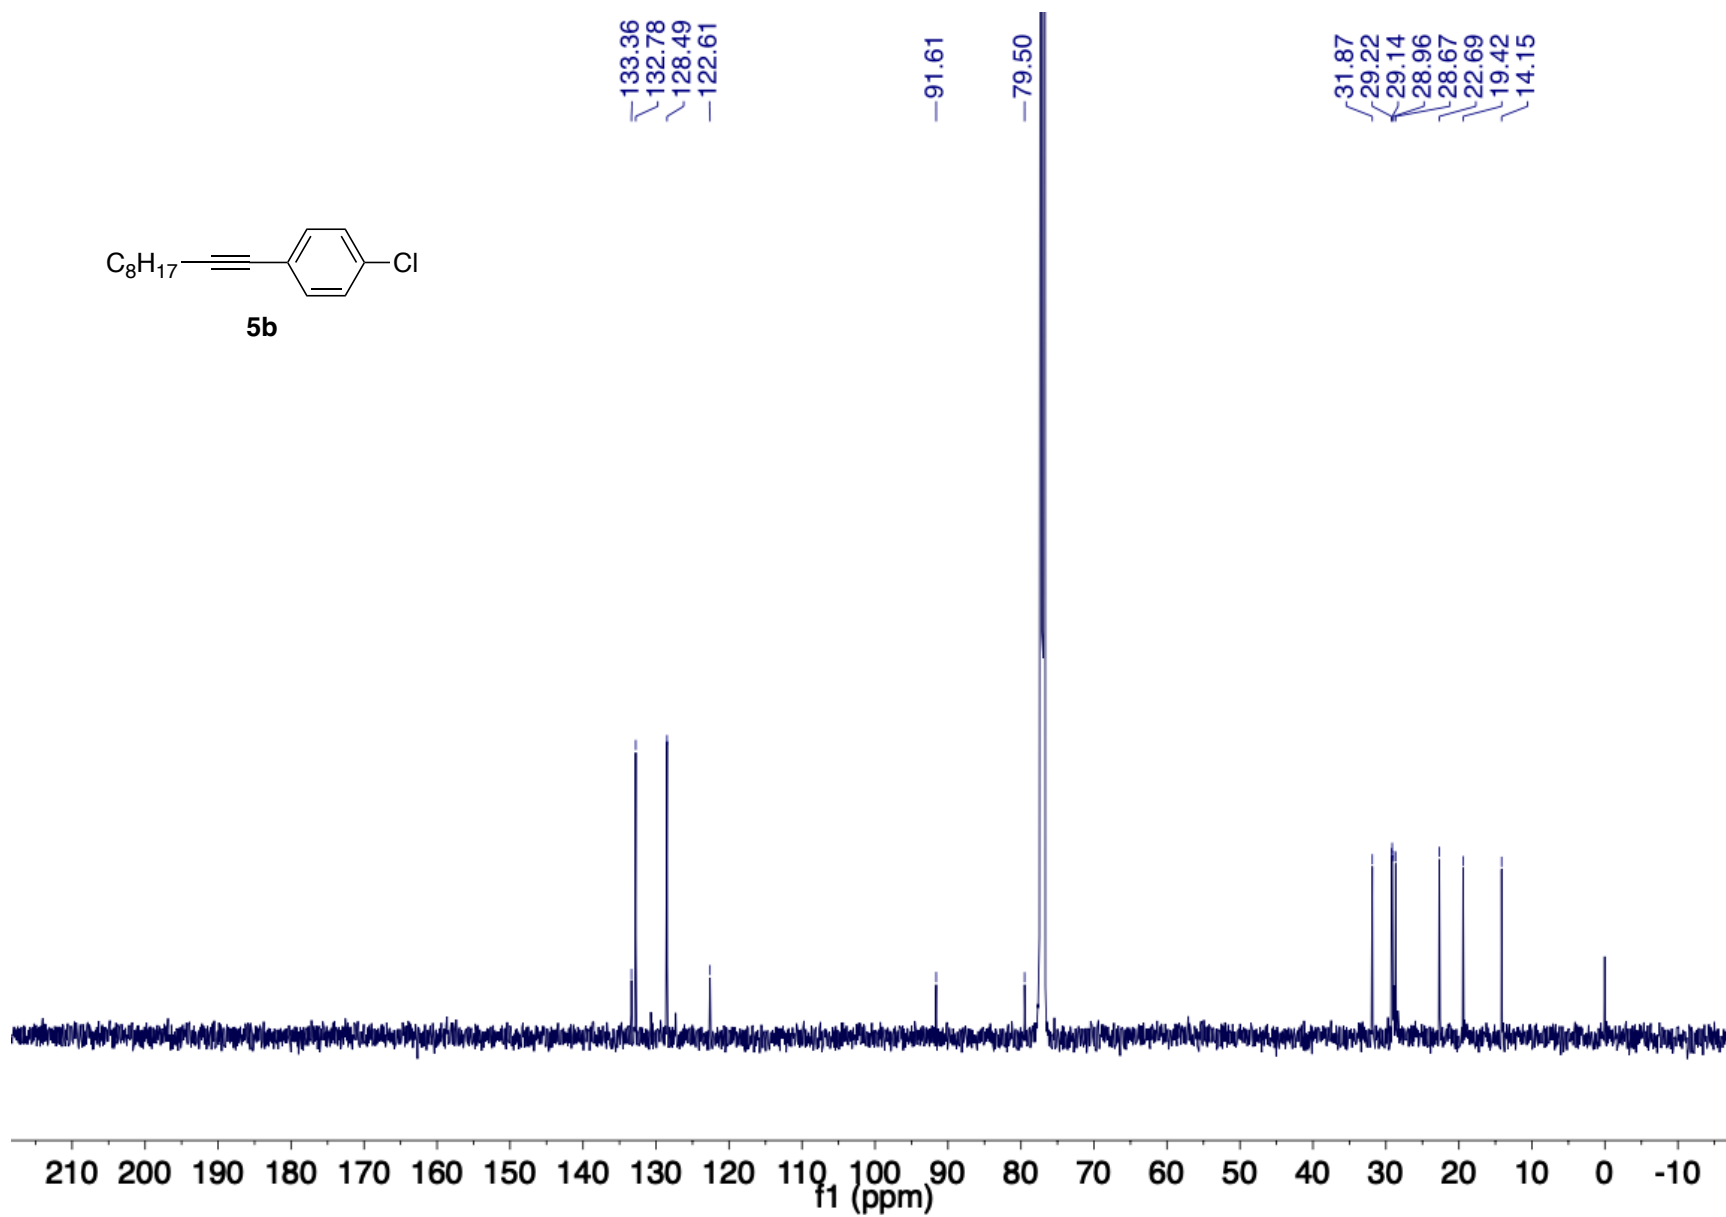

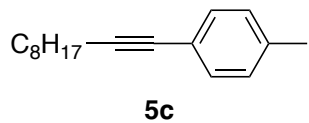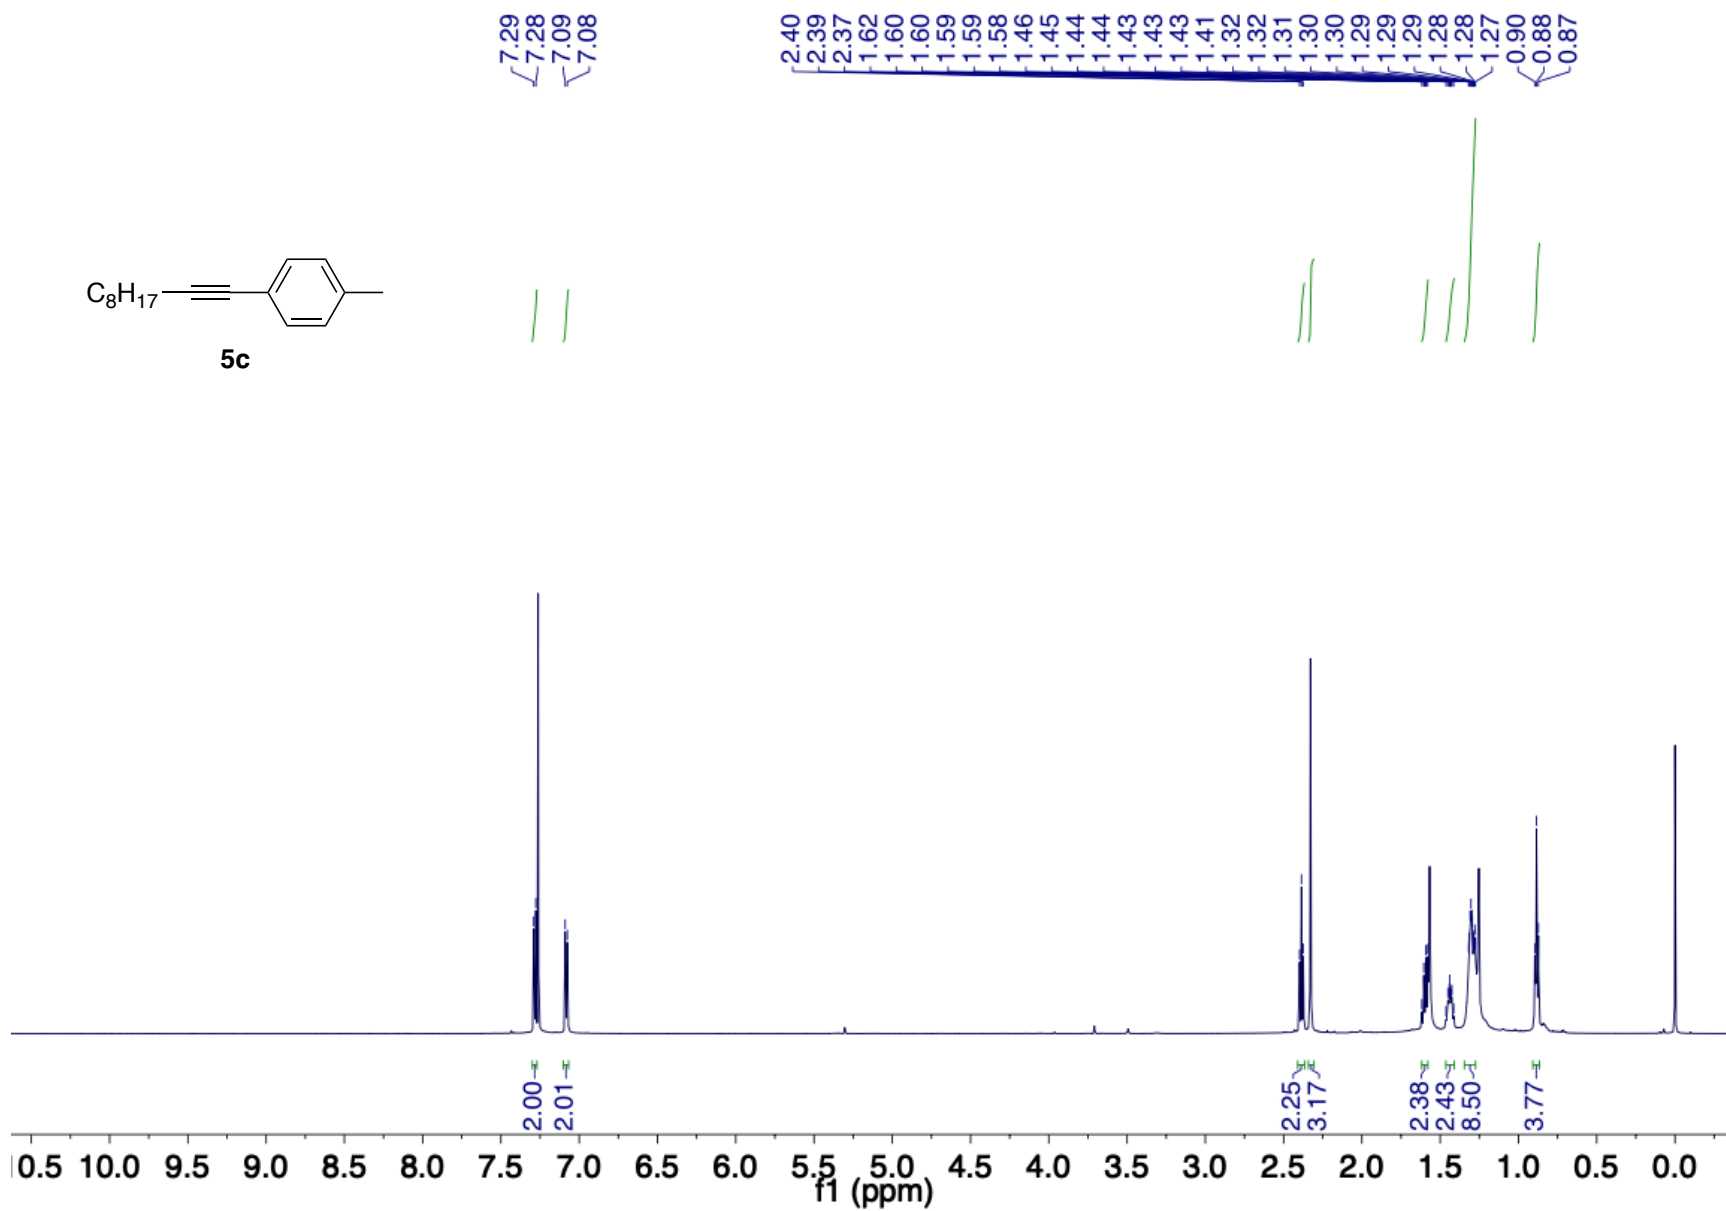

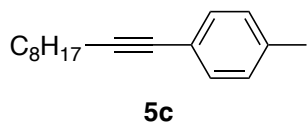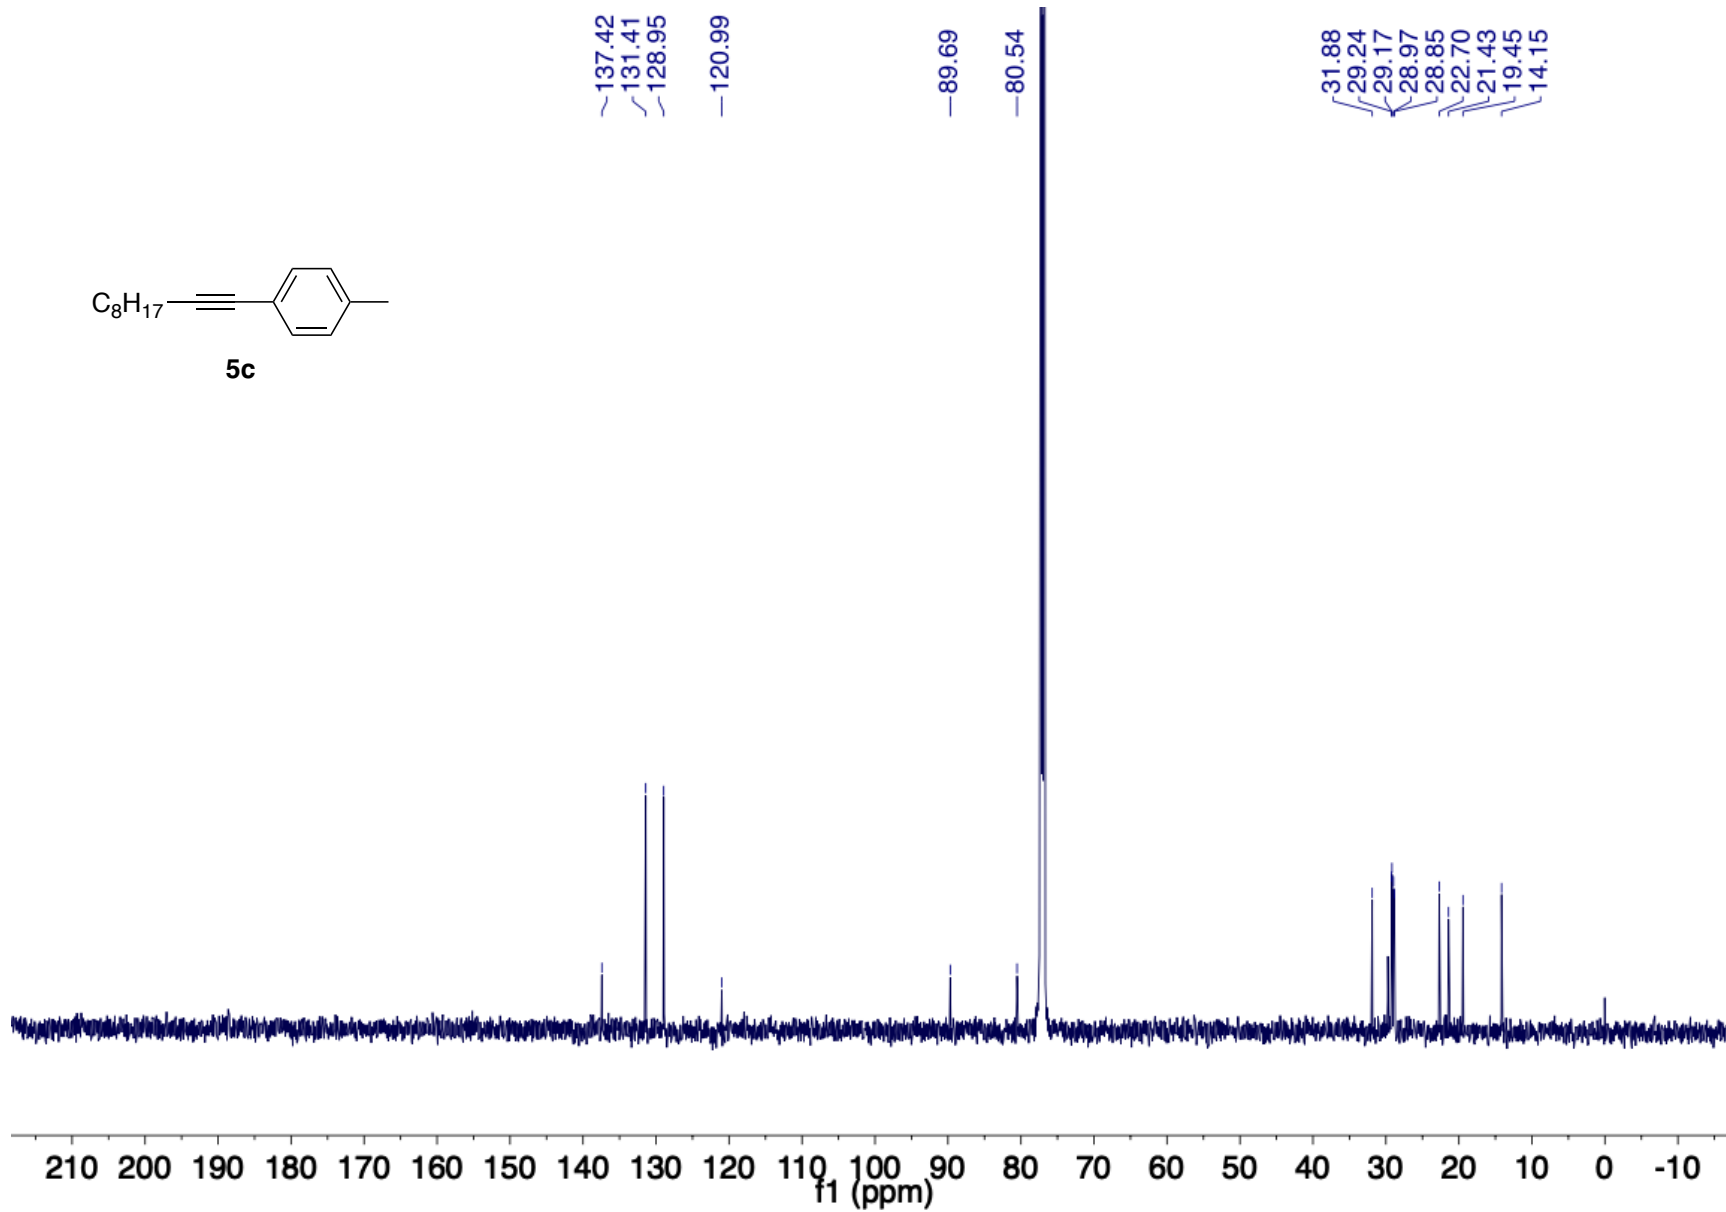

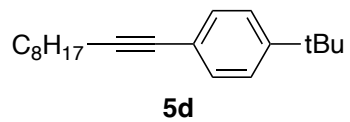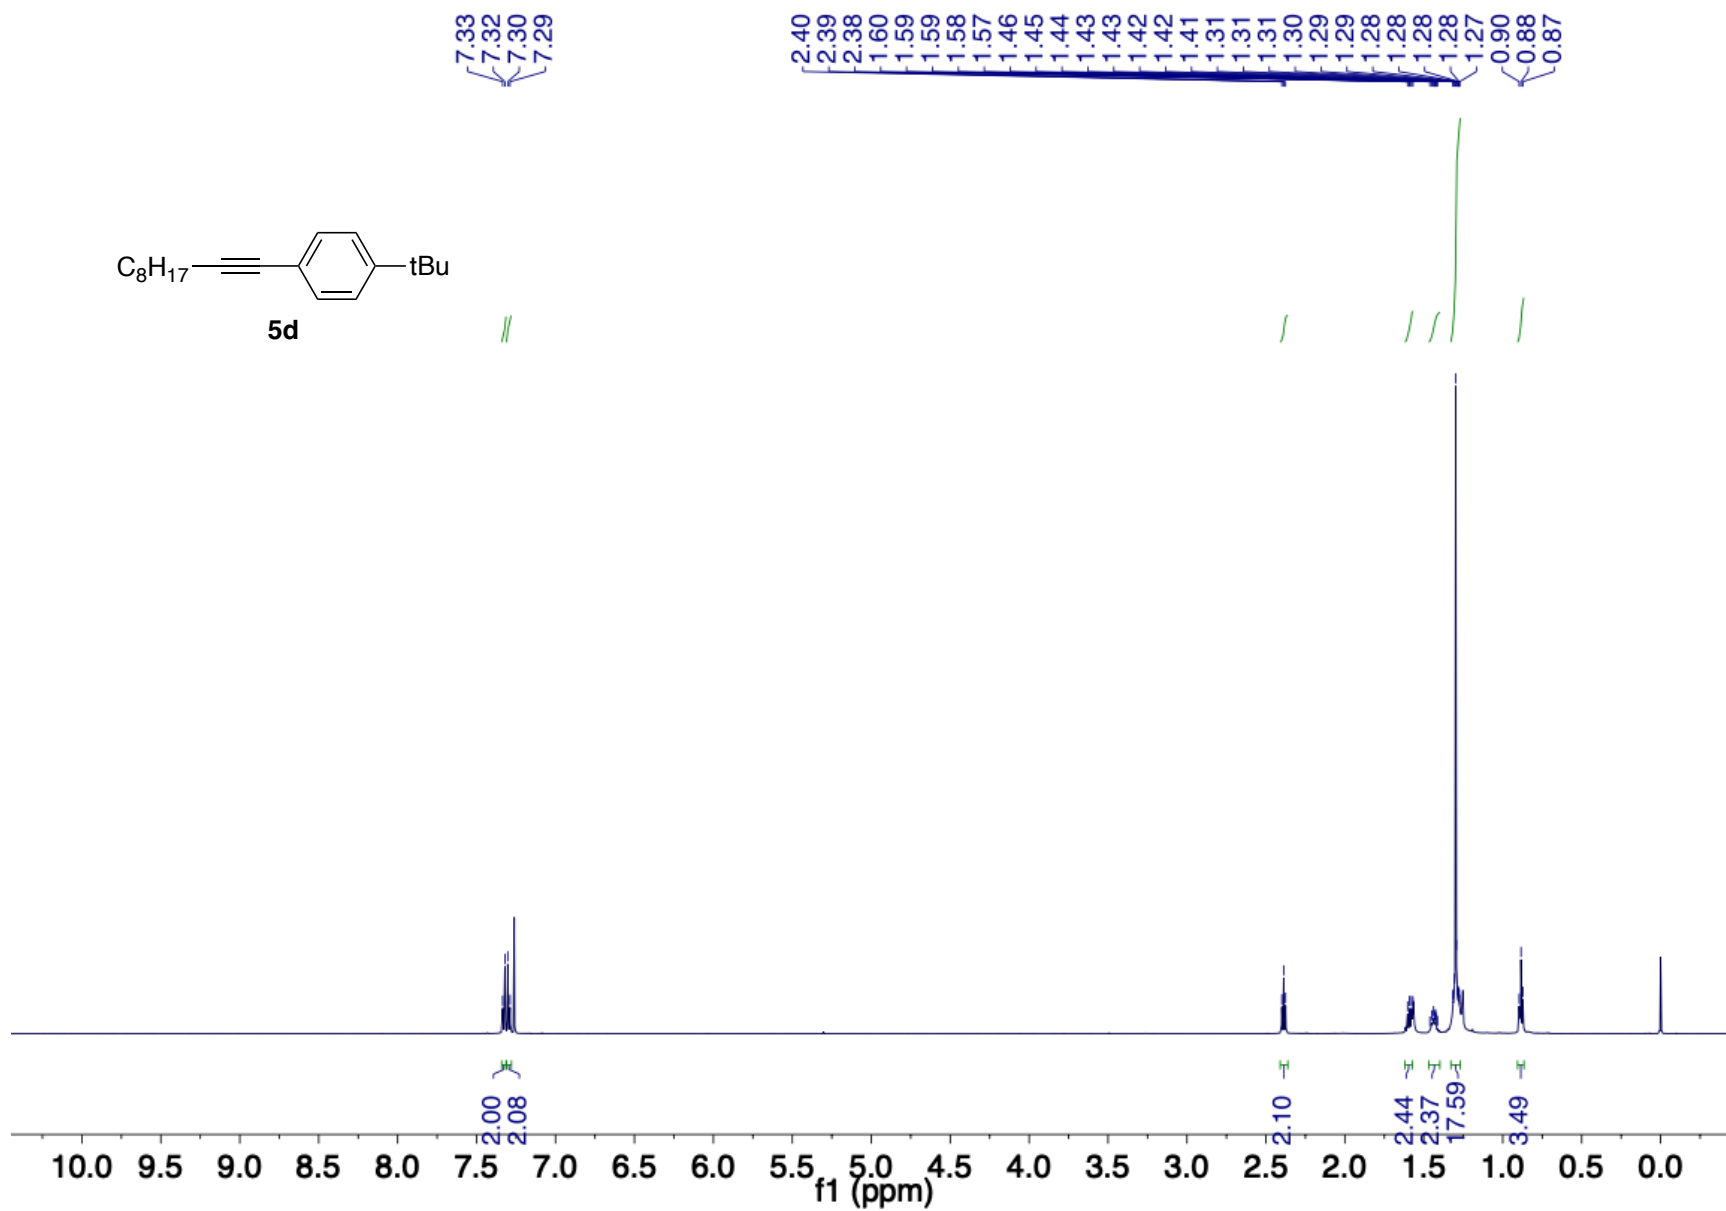

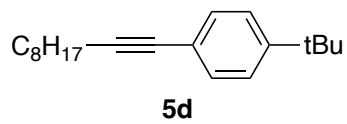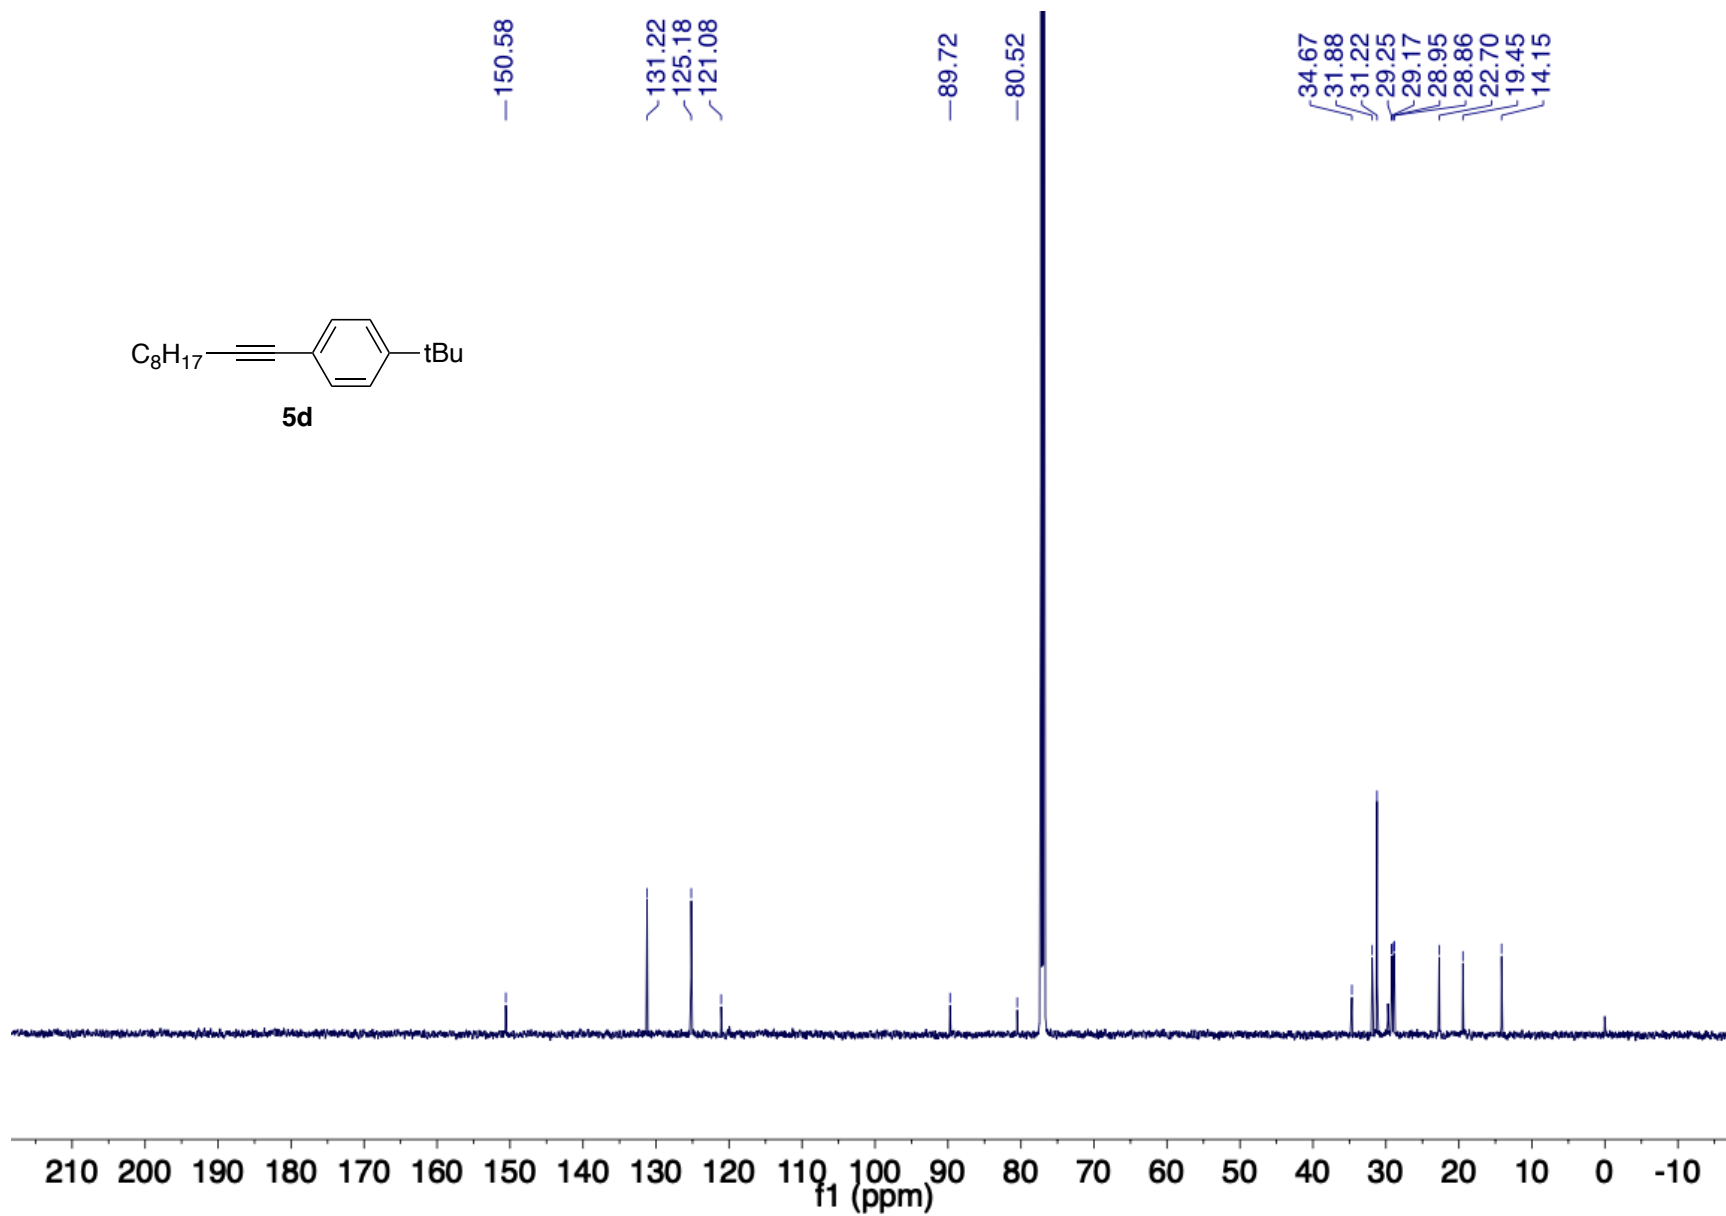

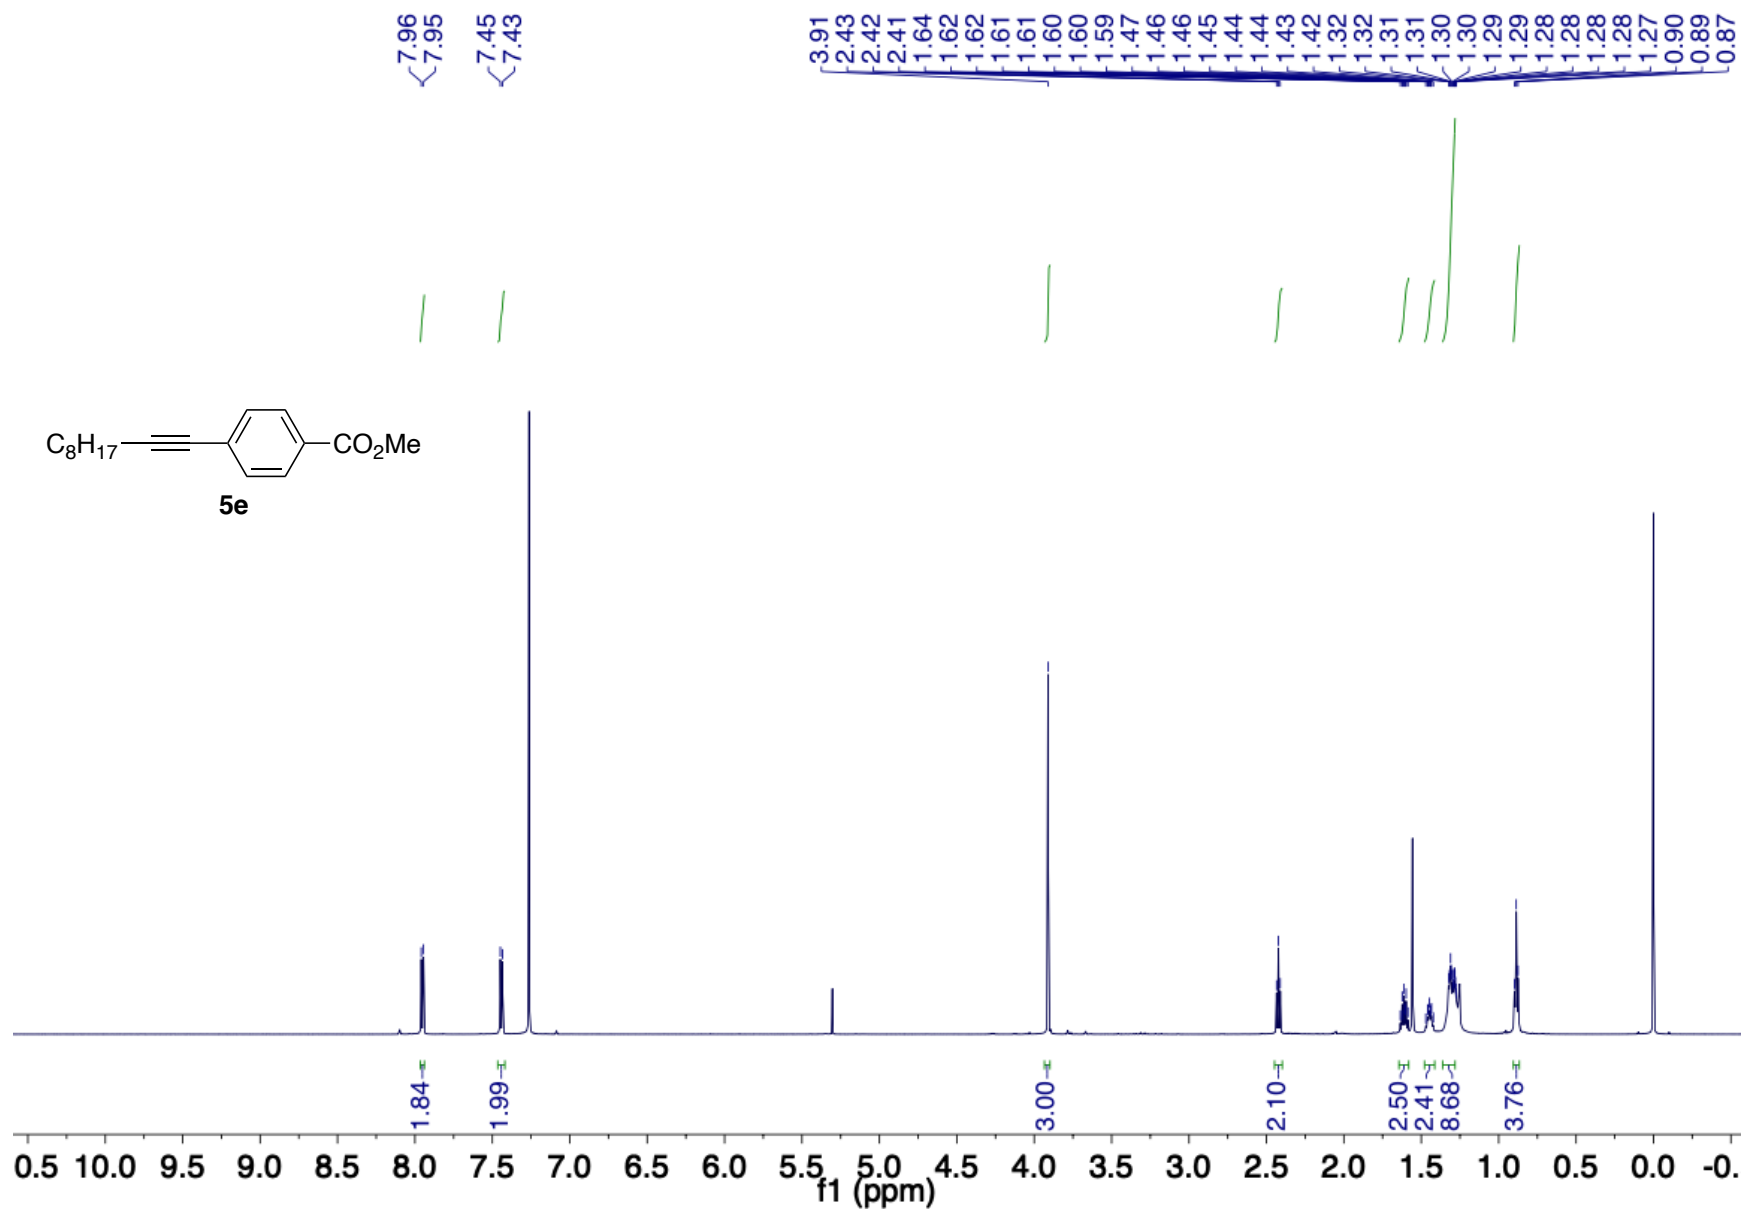



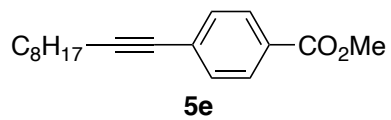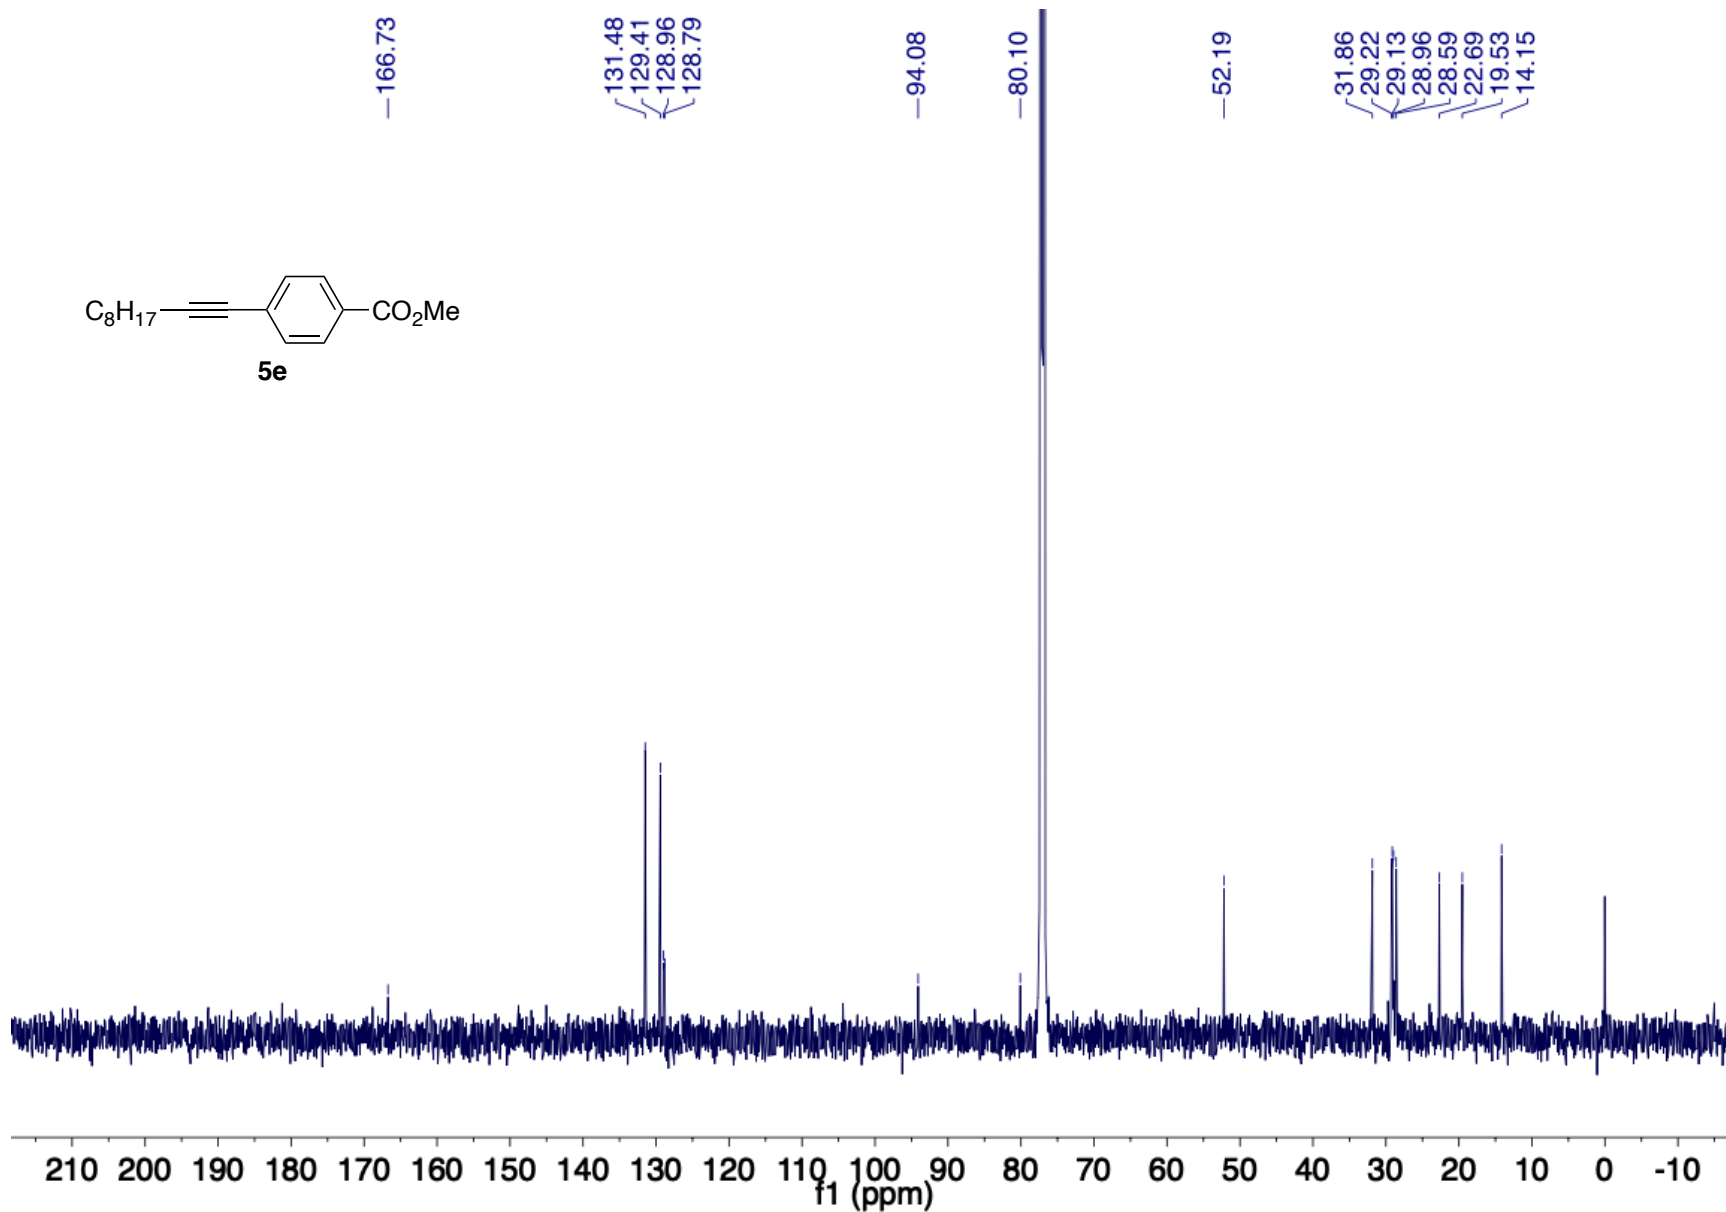

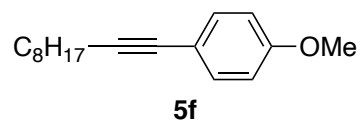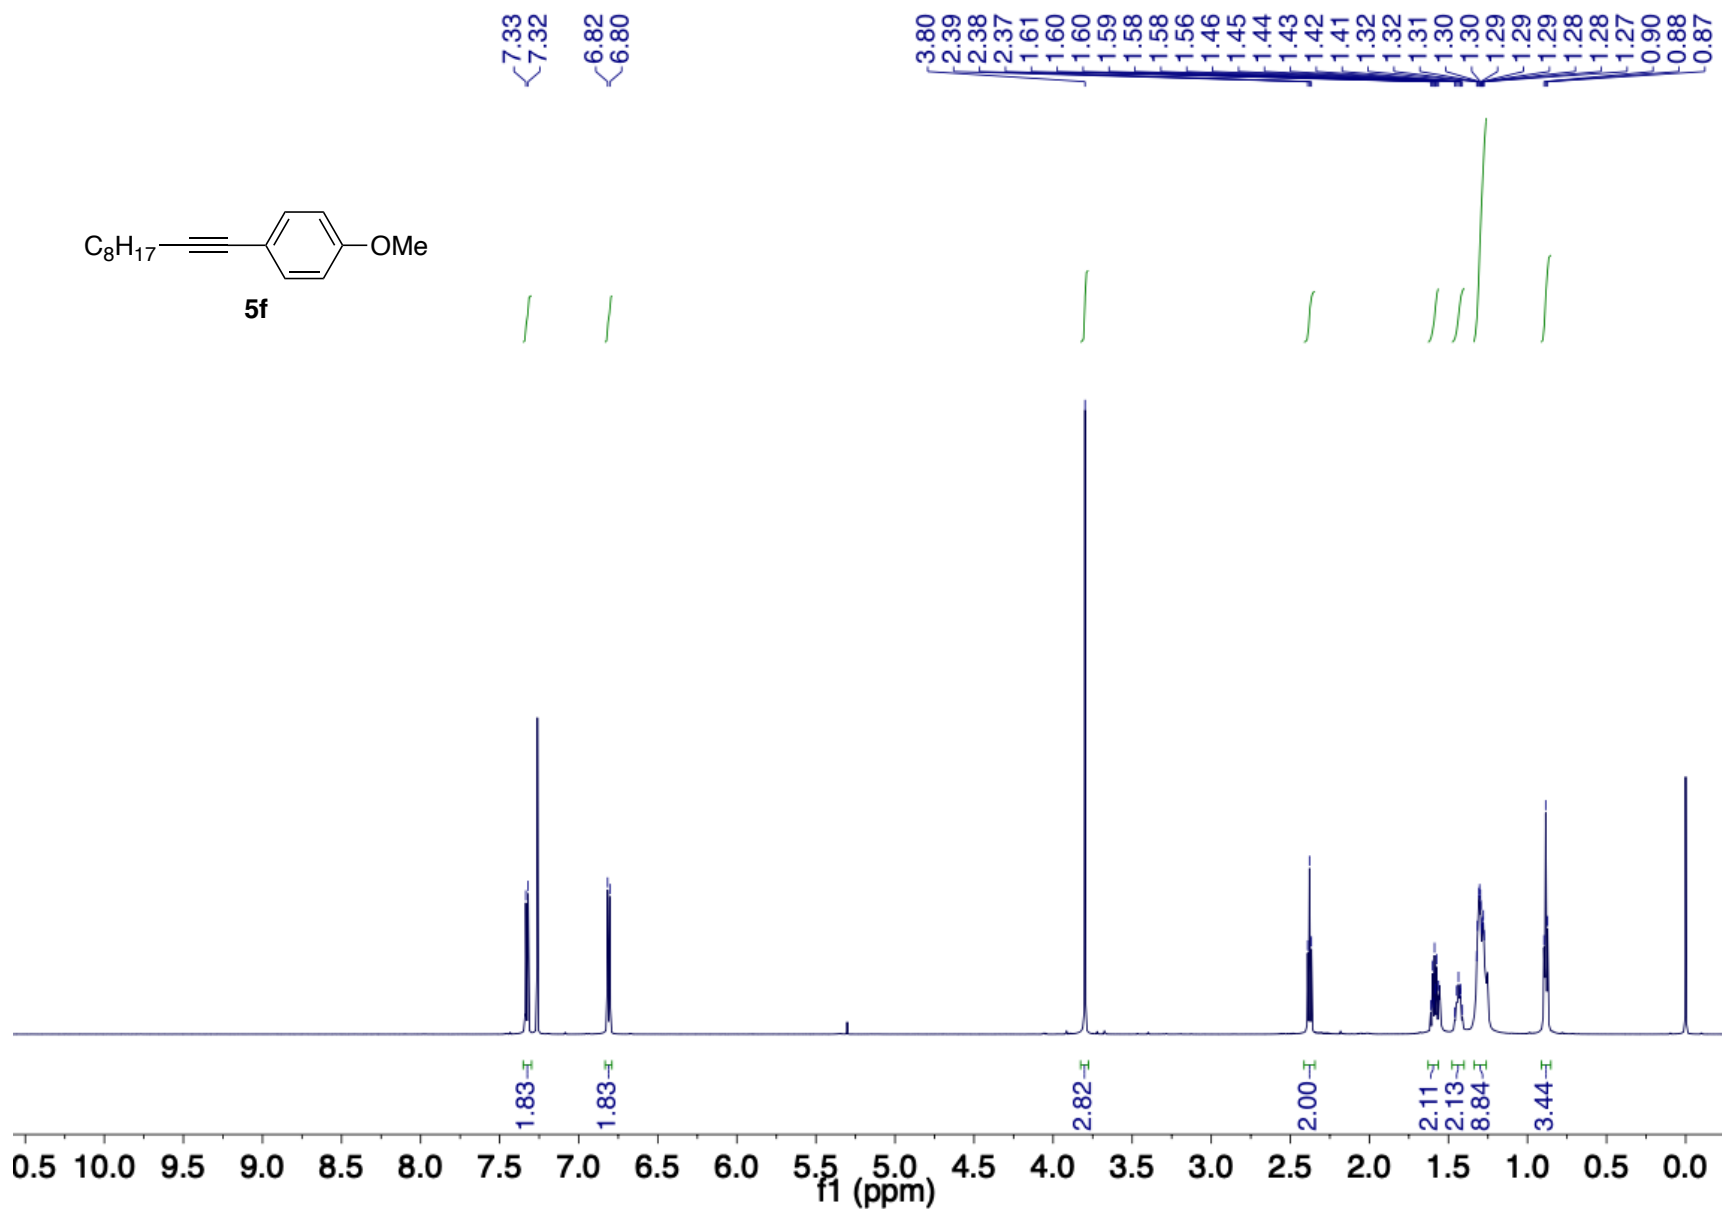

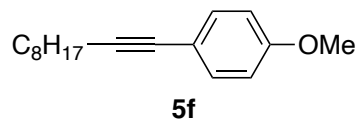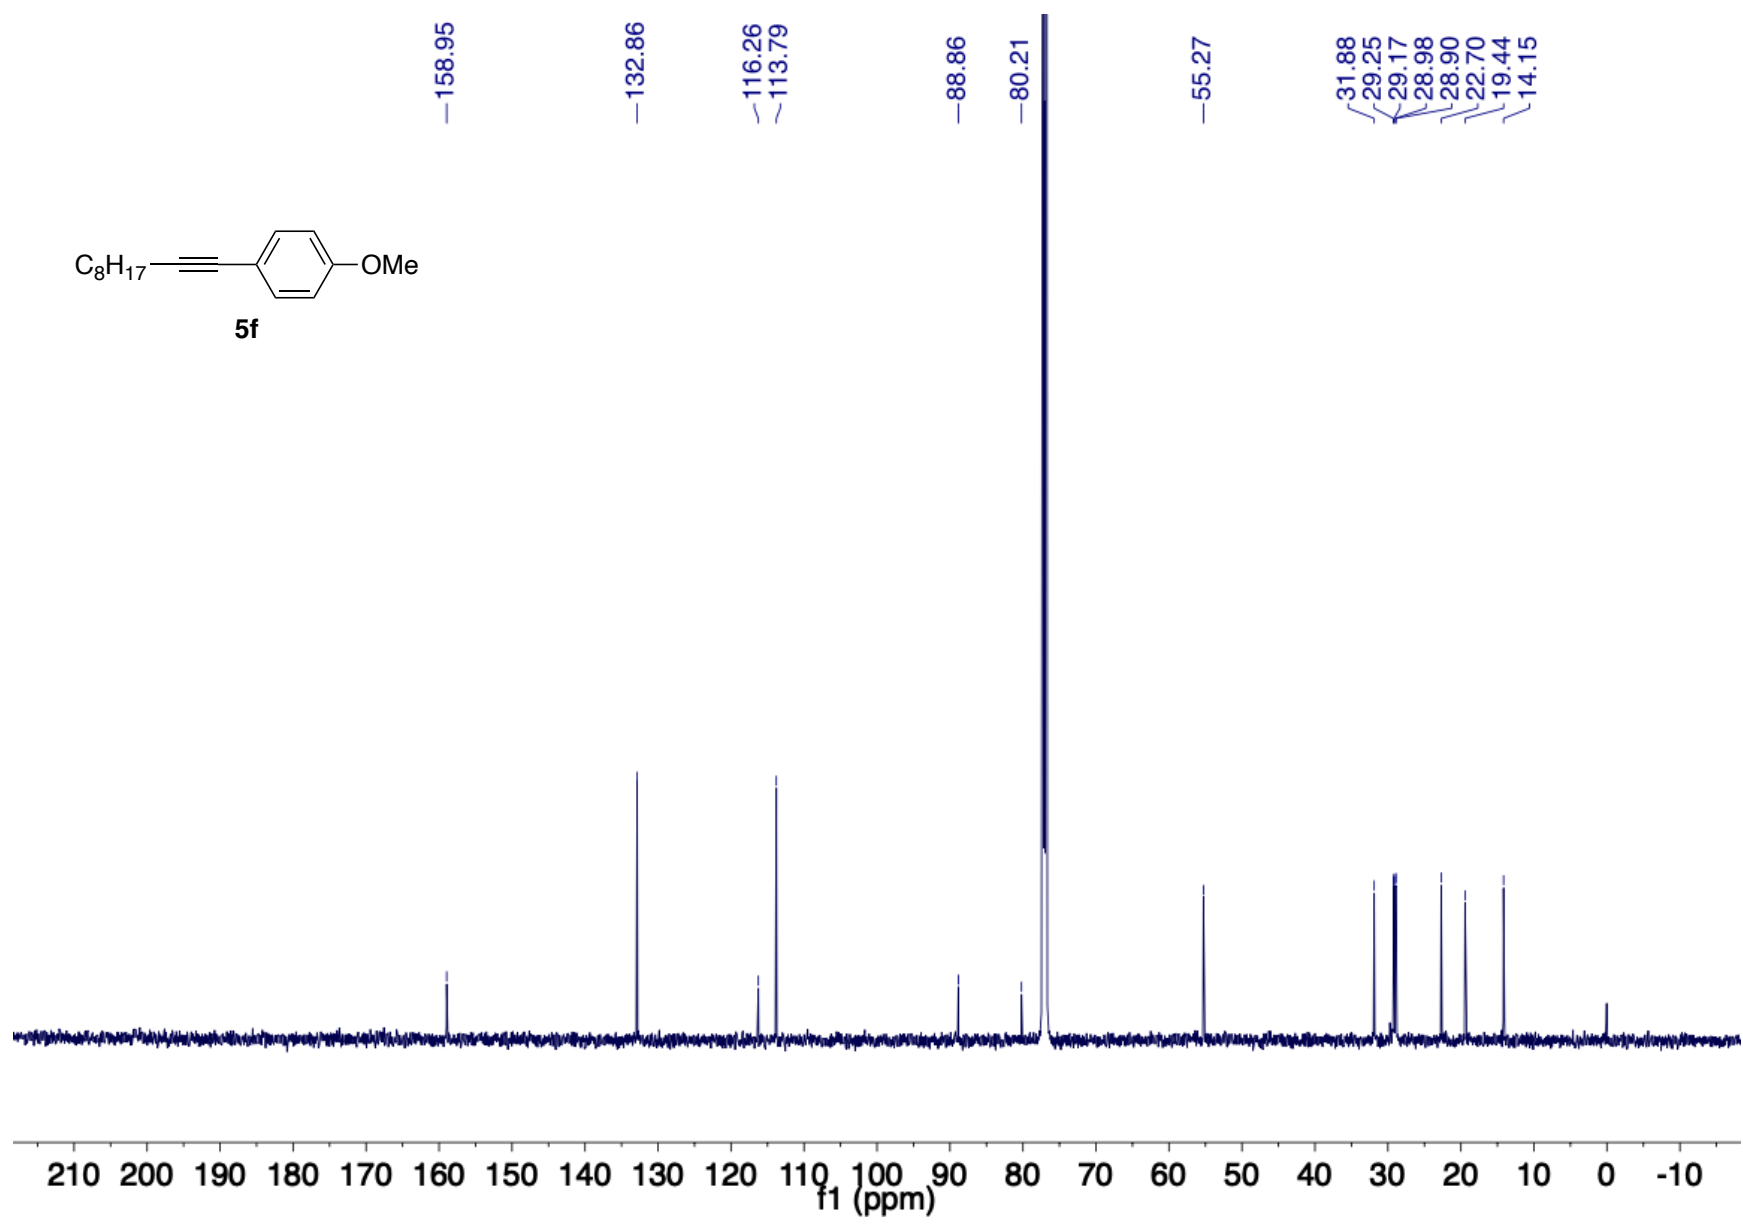

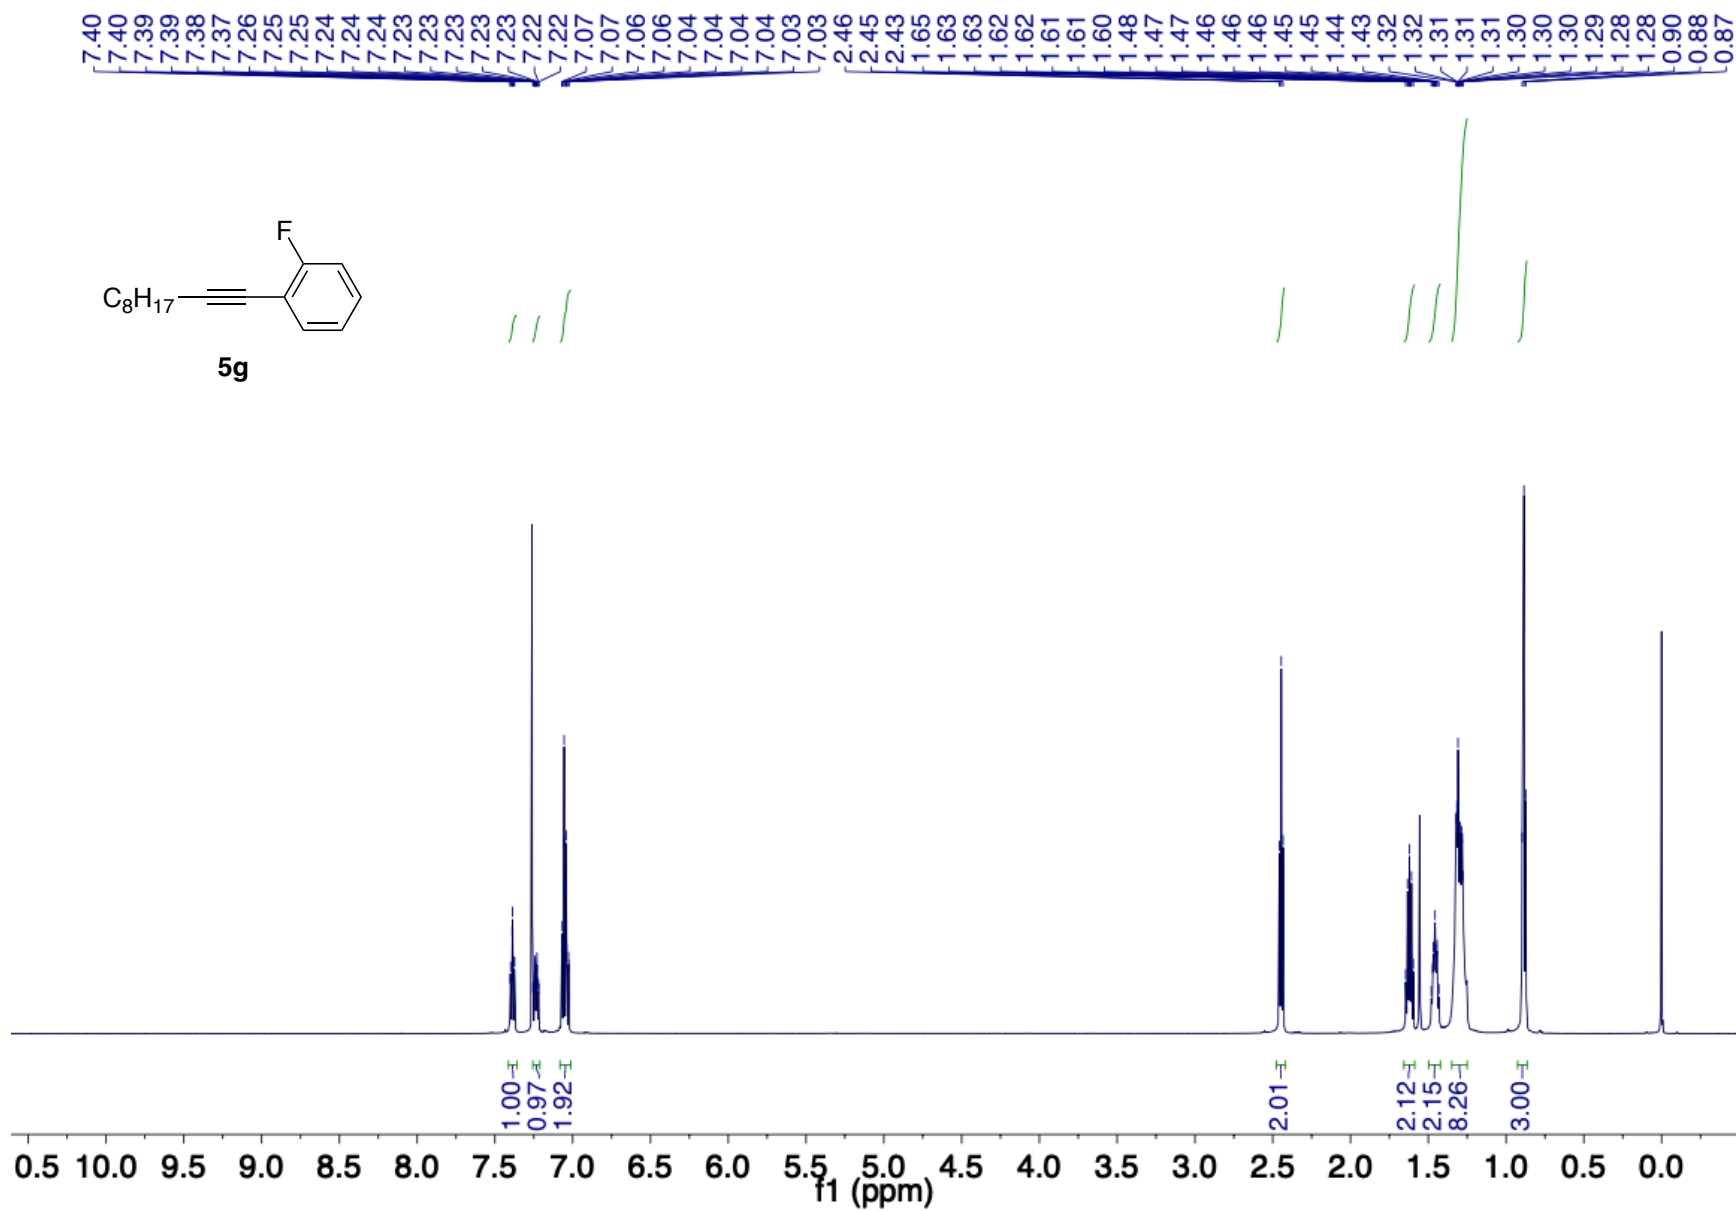

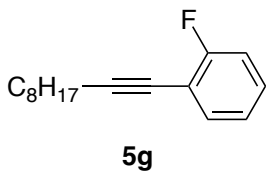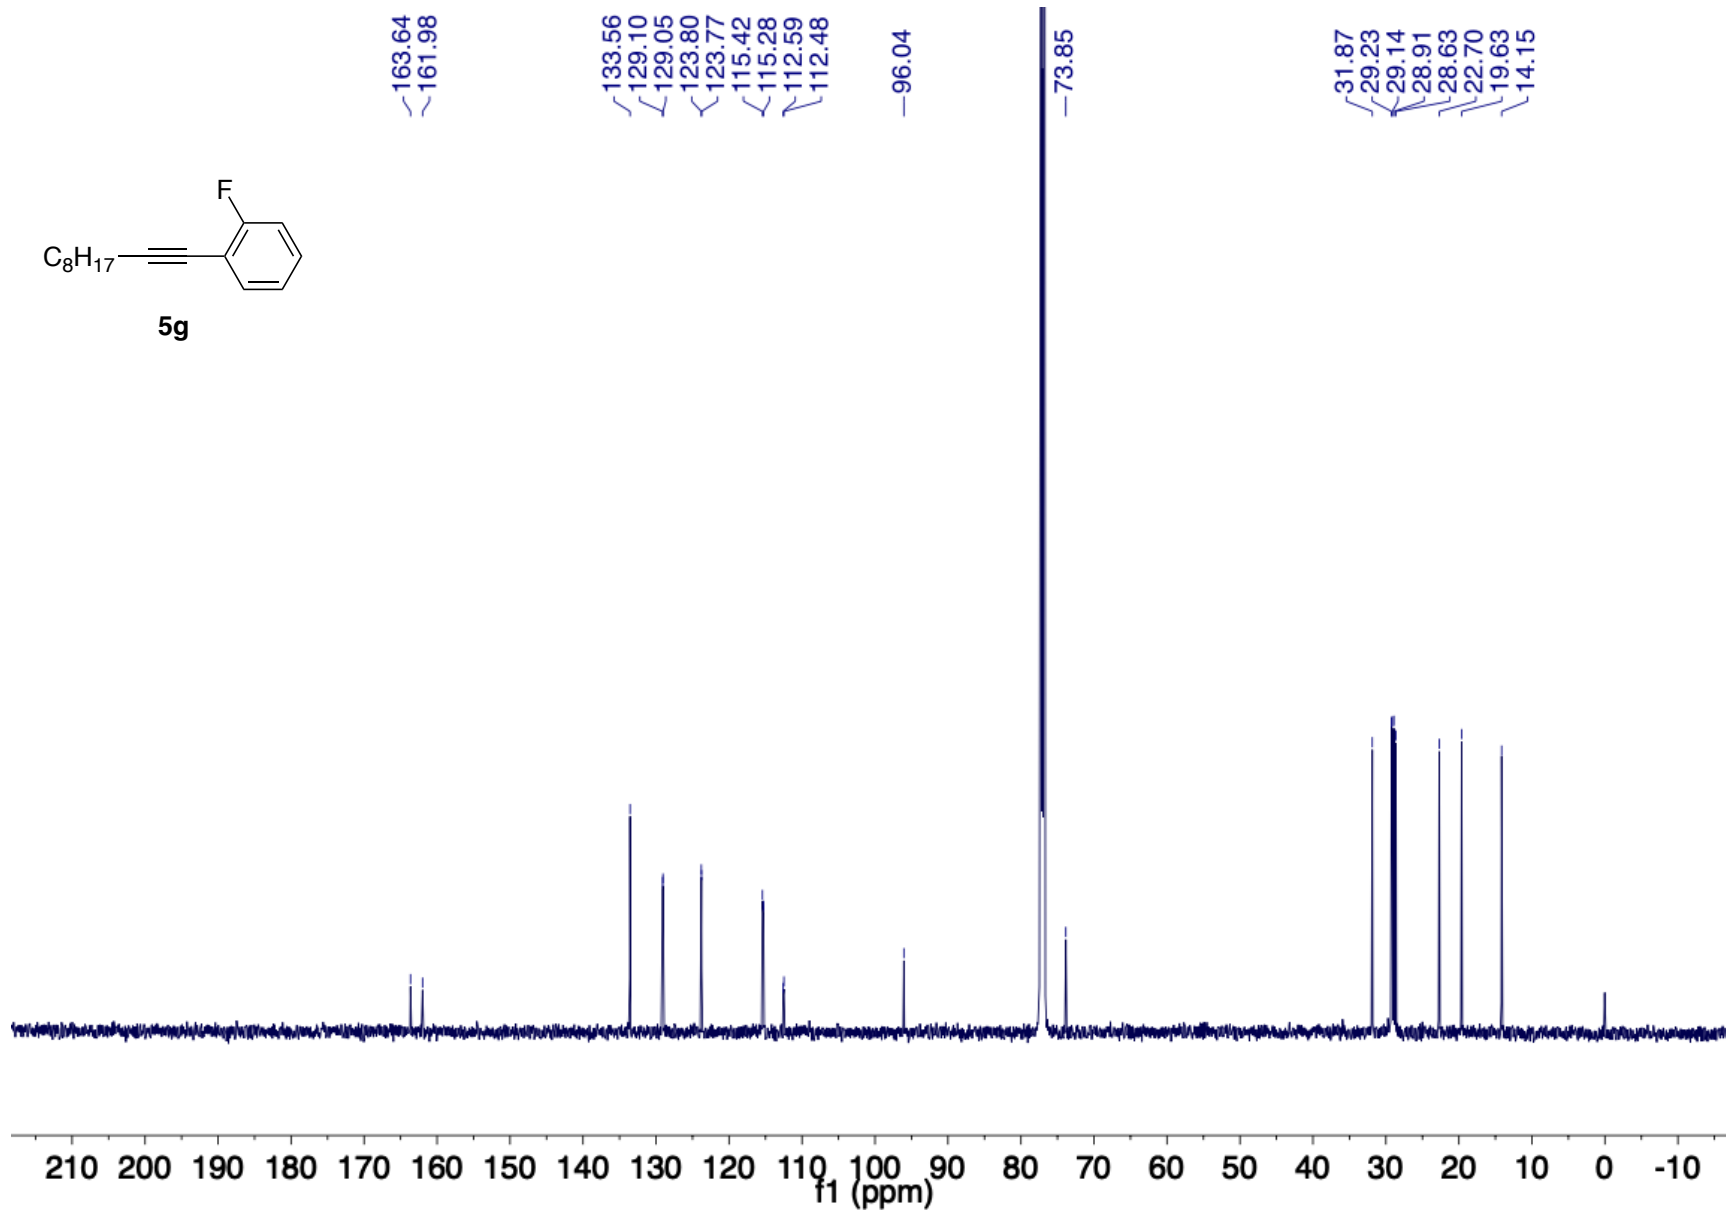

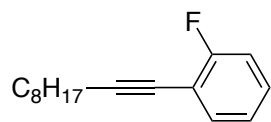

5g

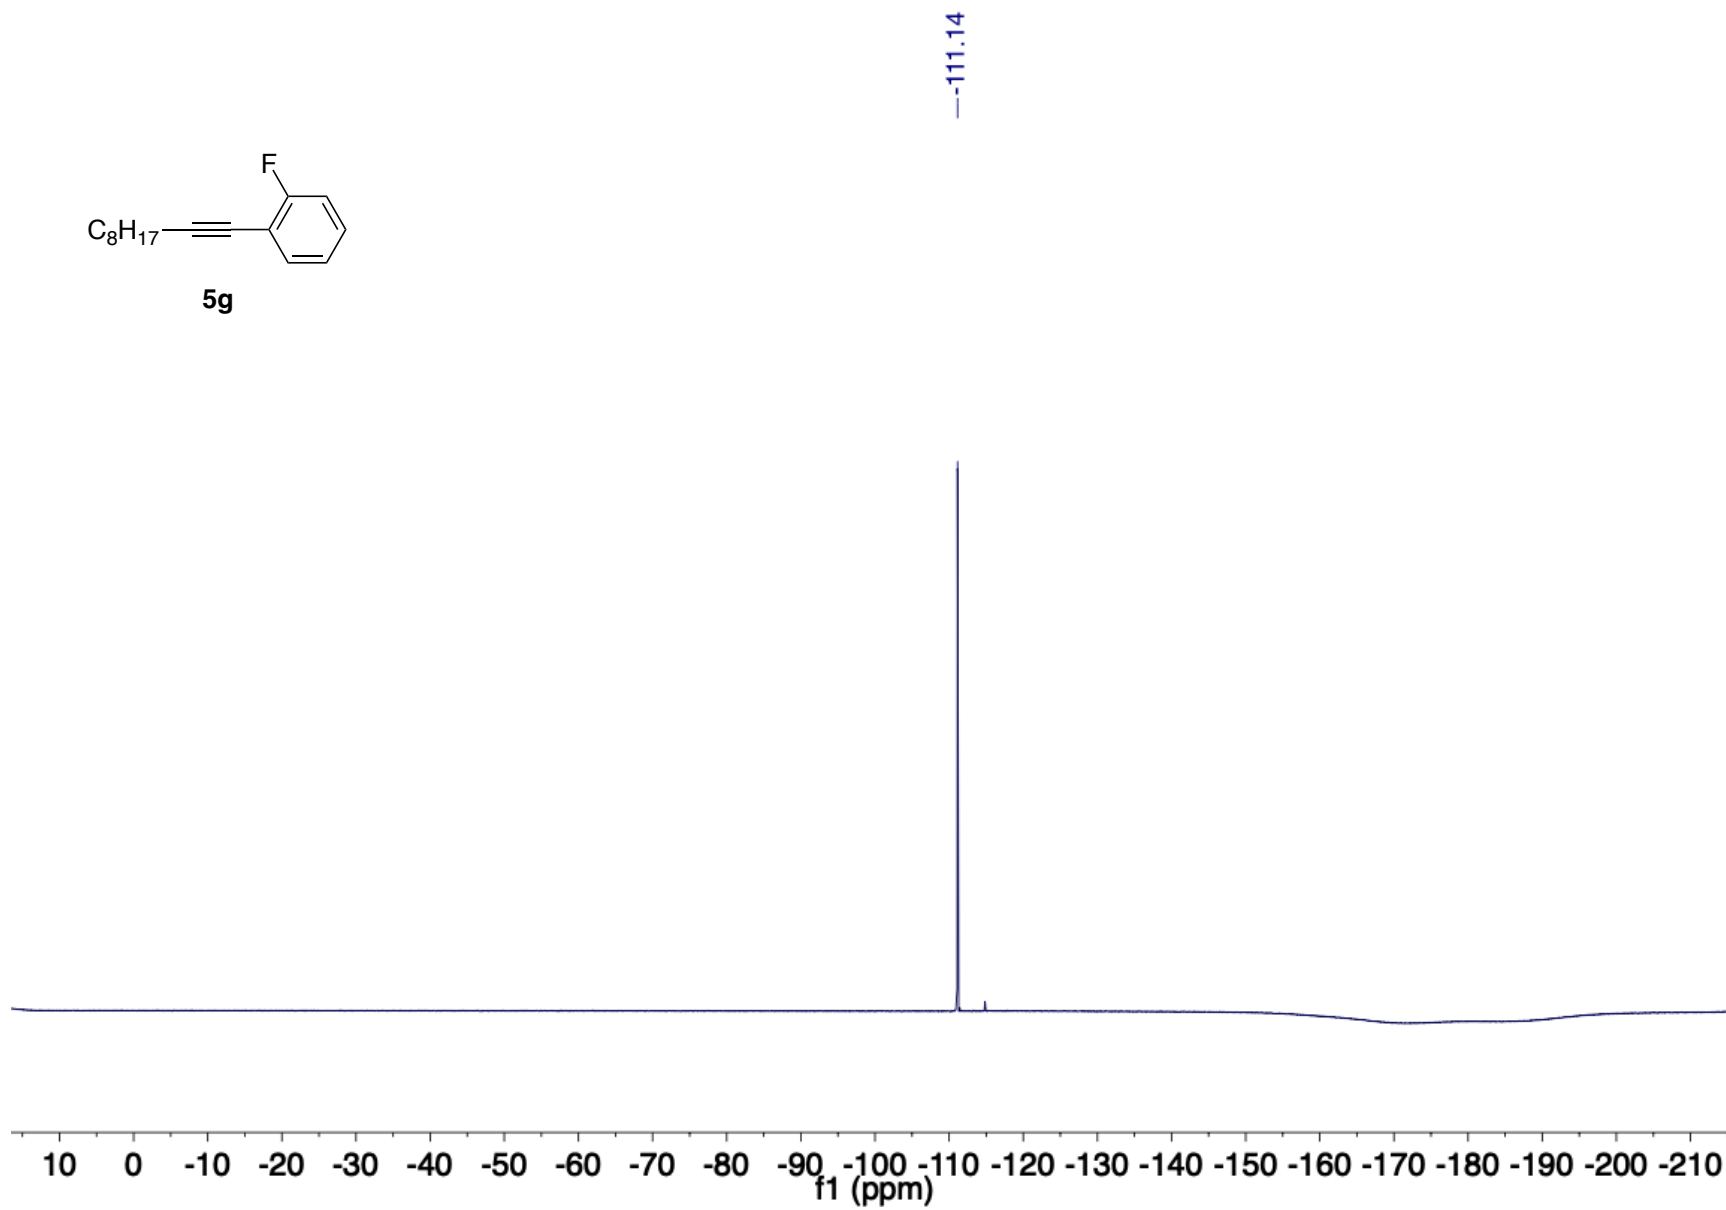



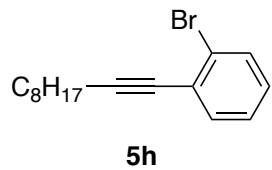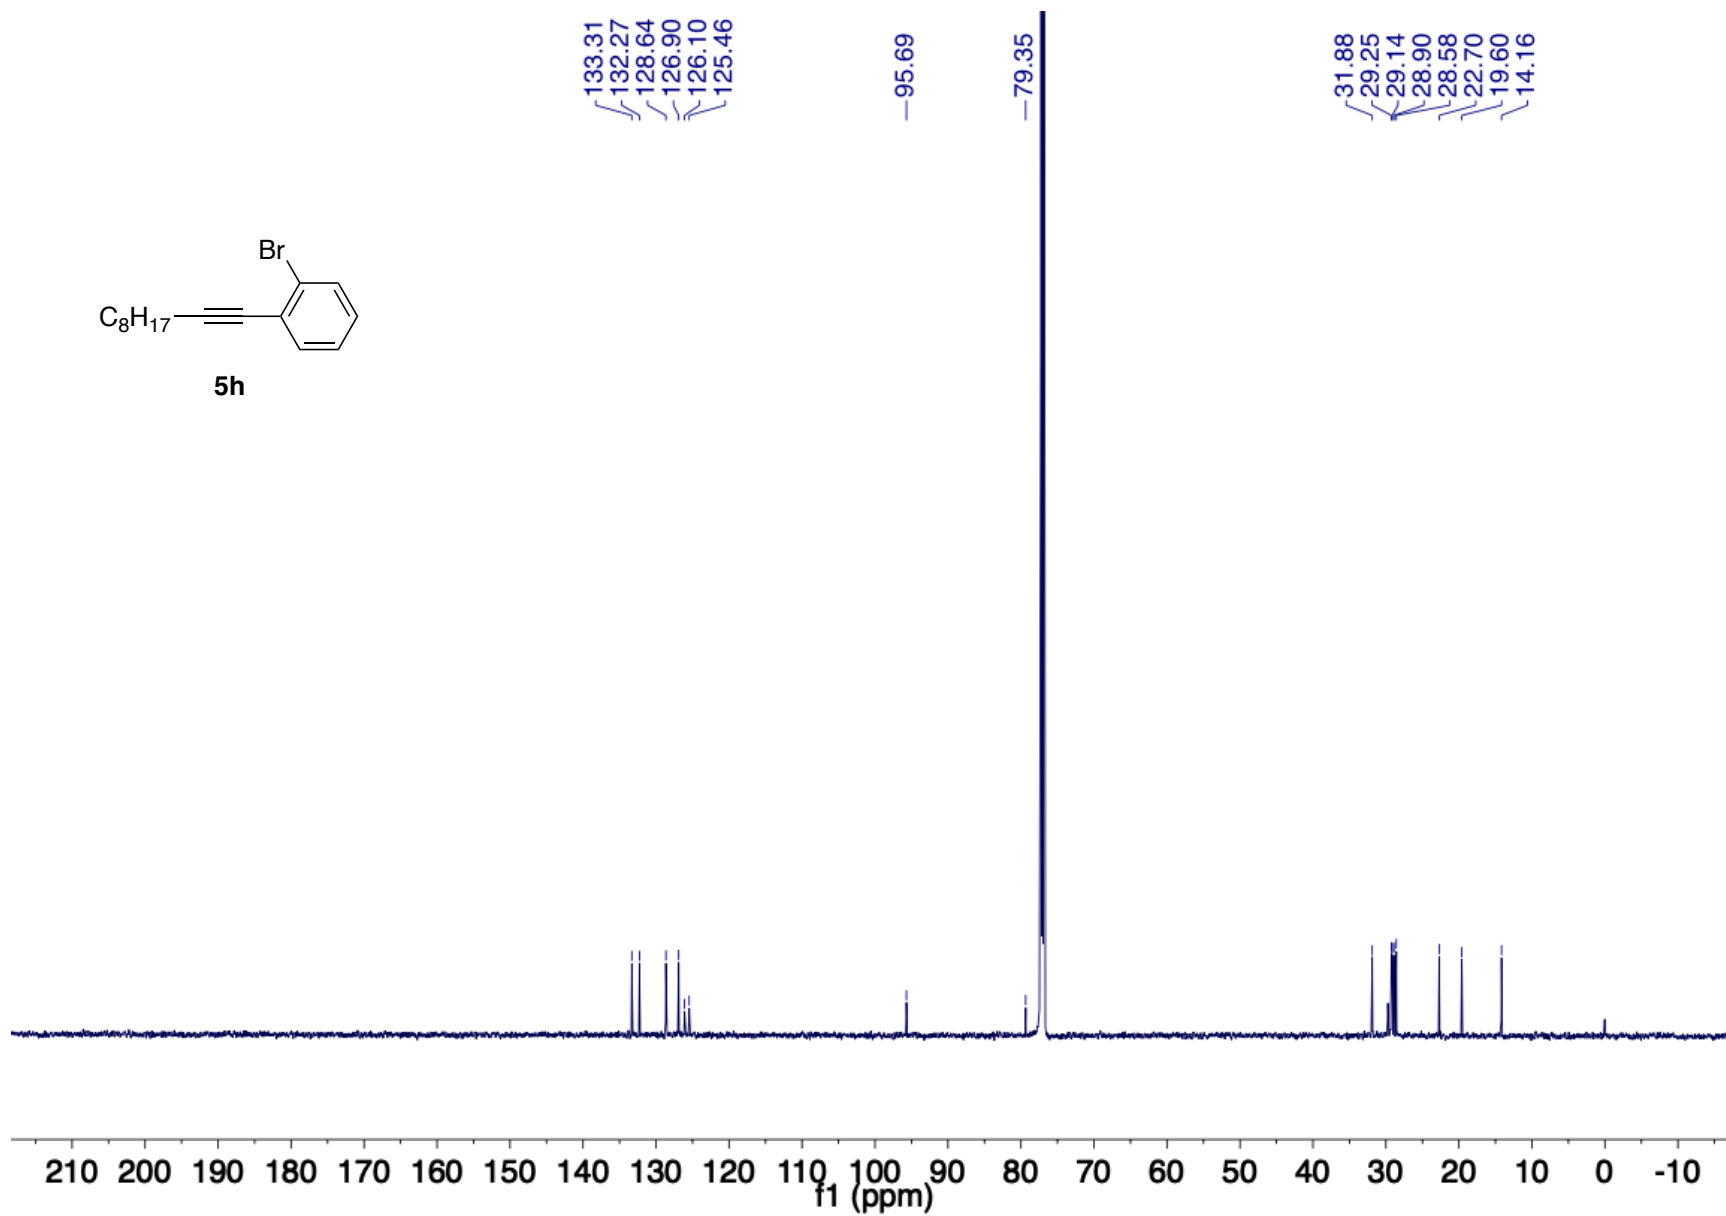



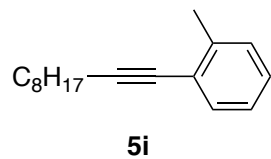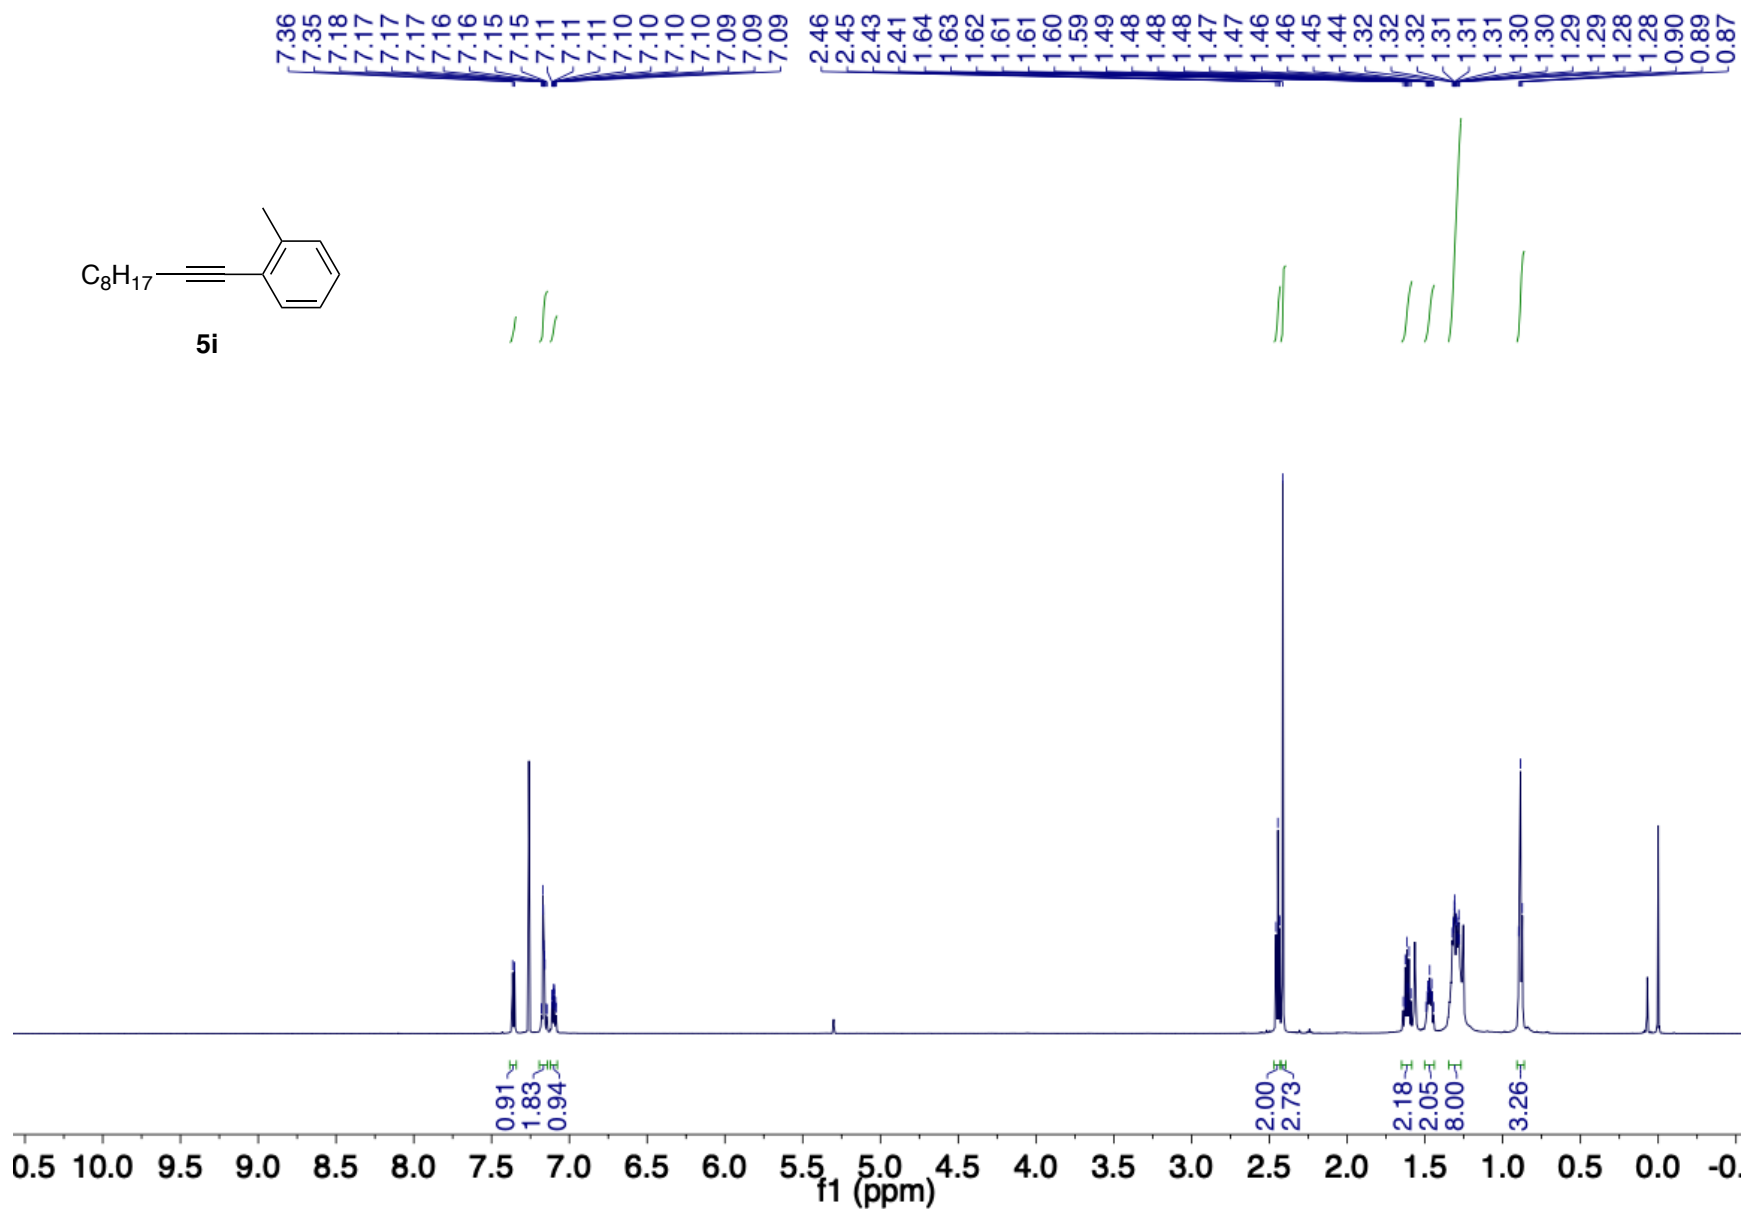

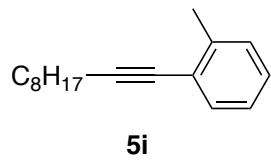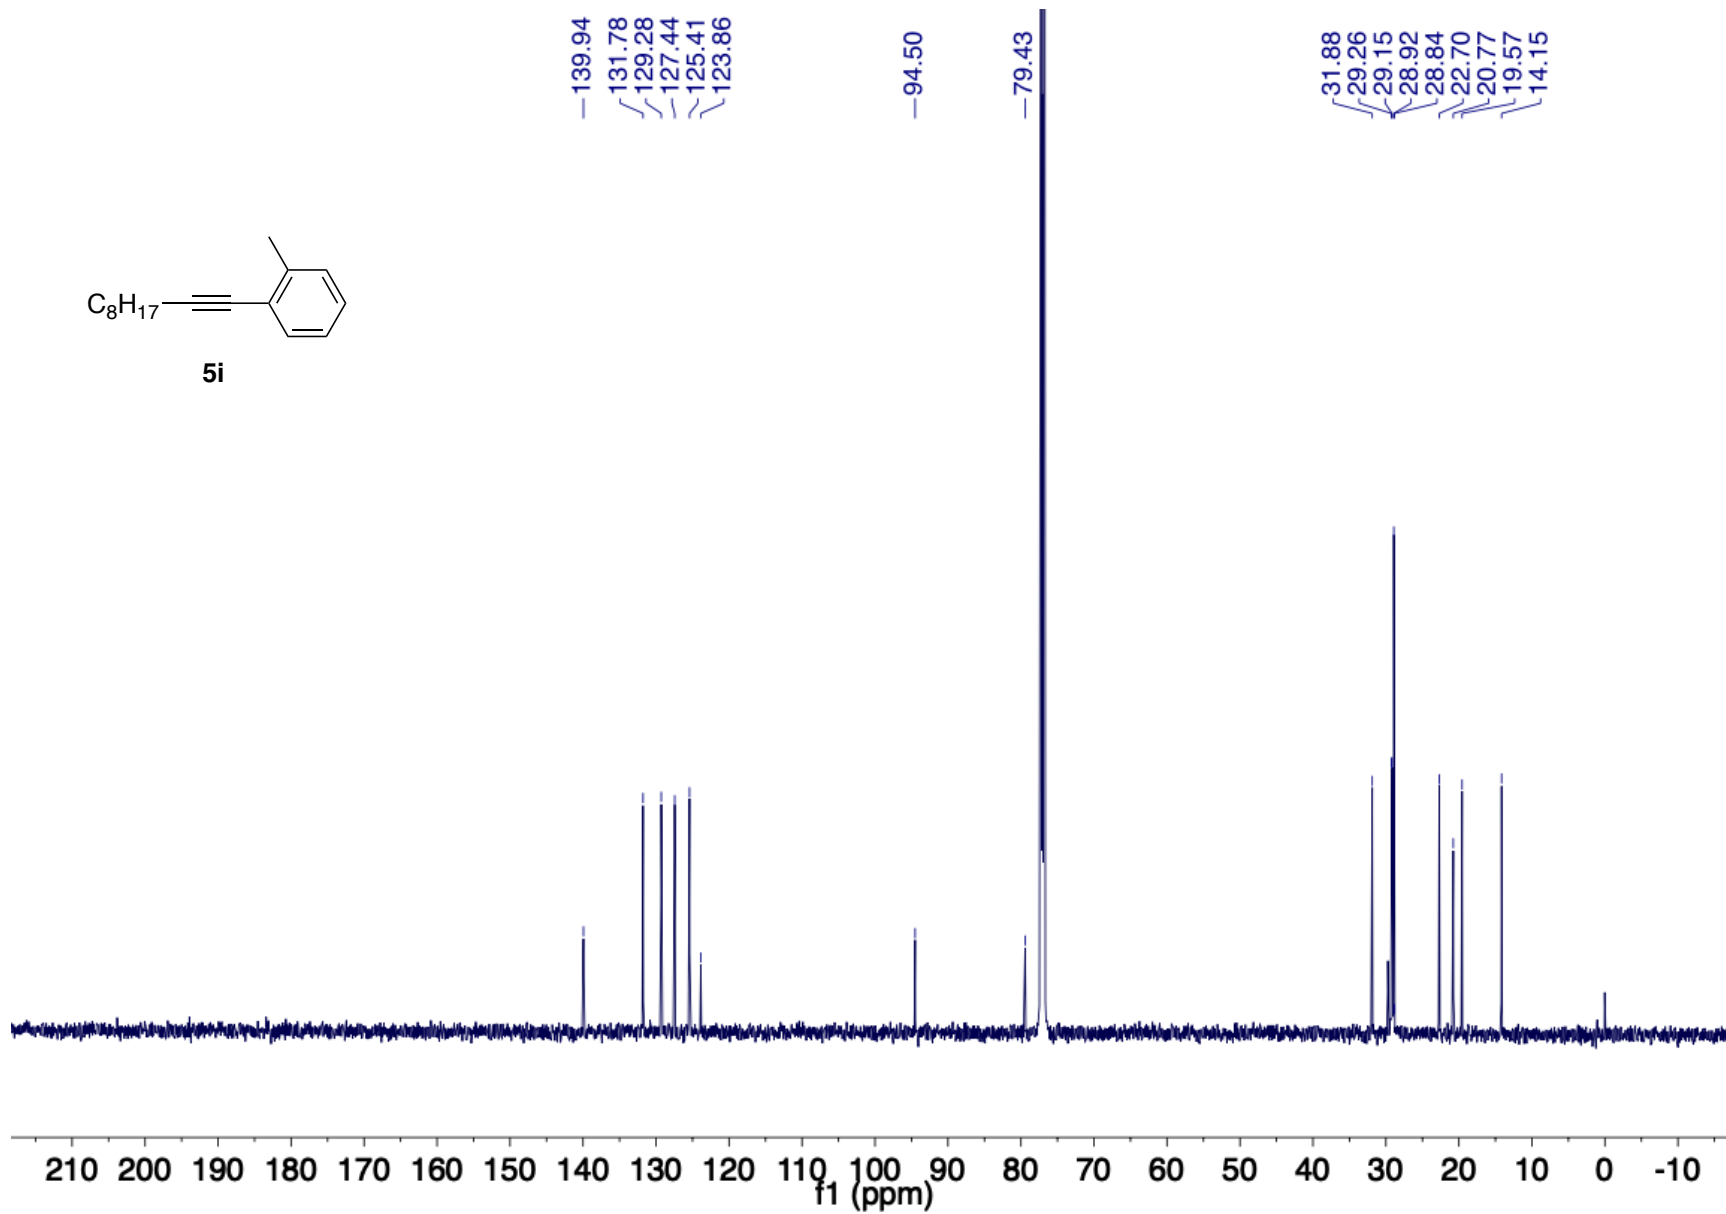

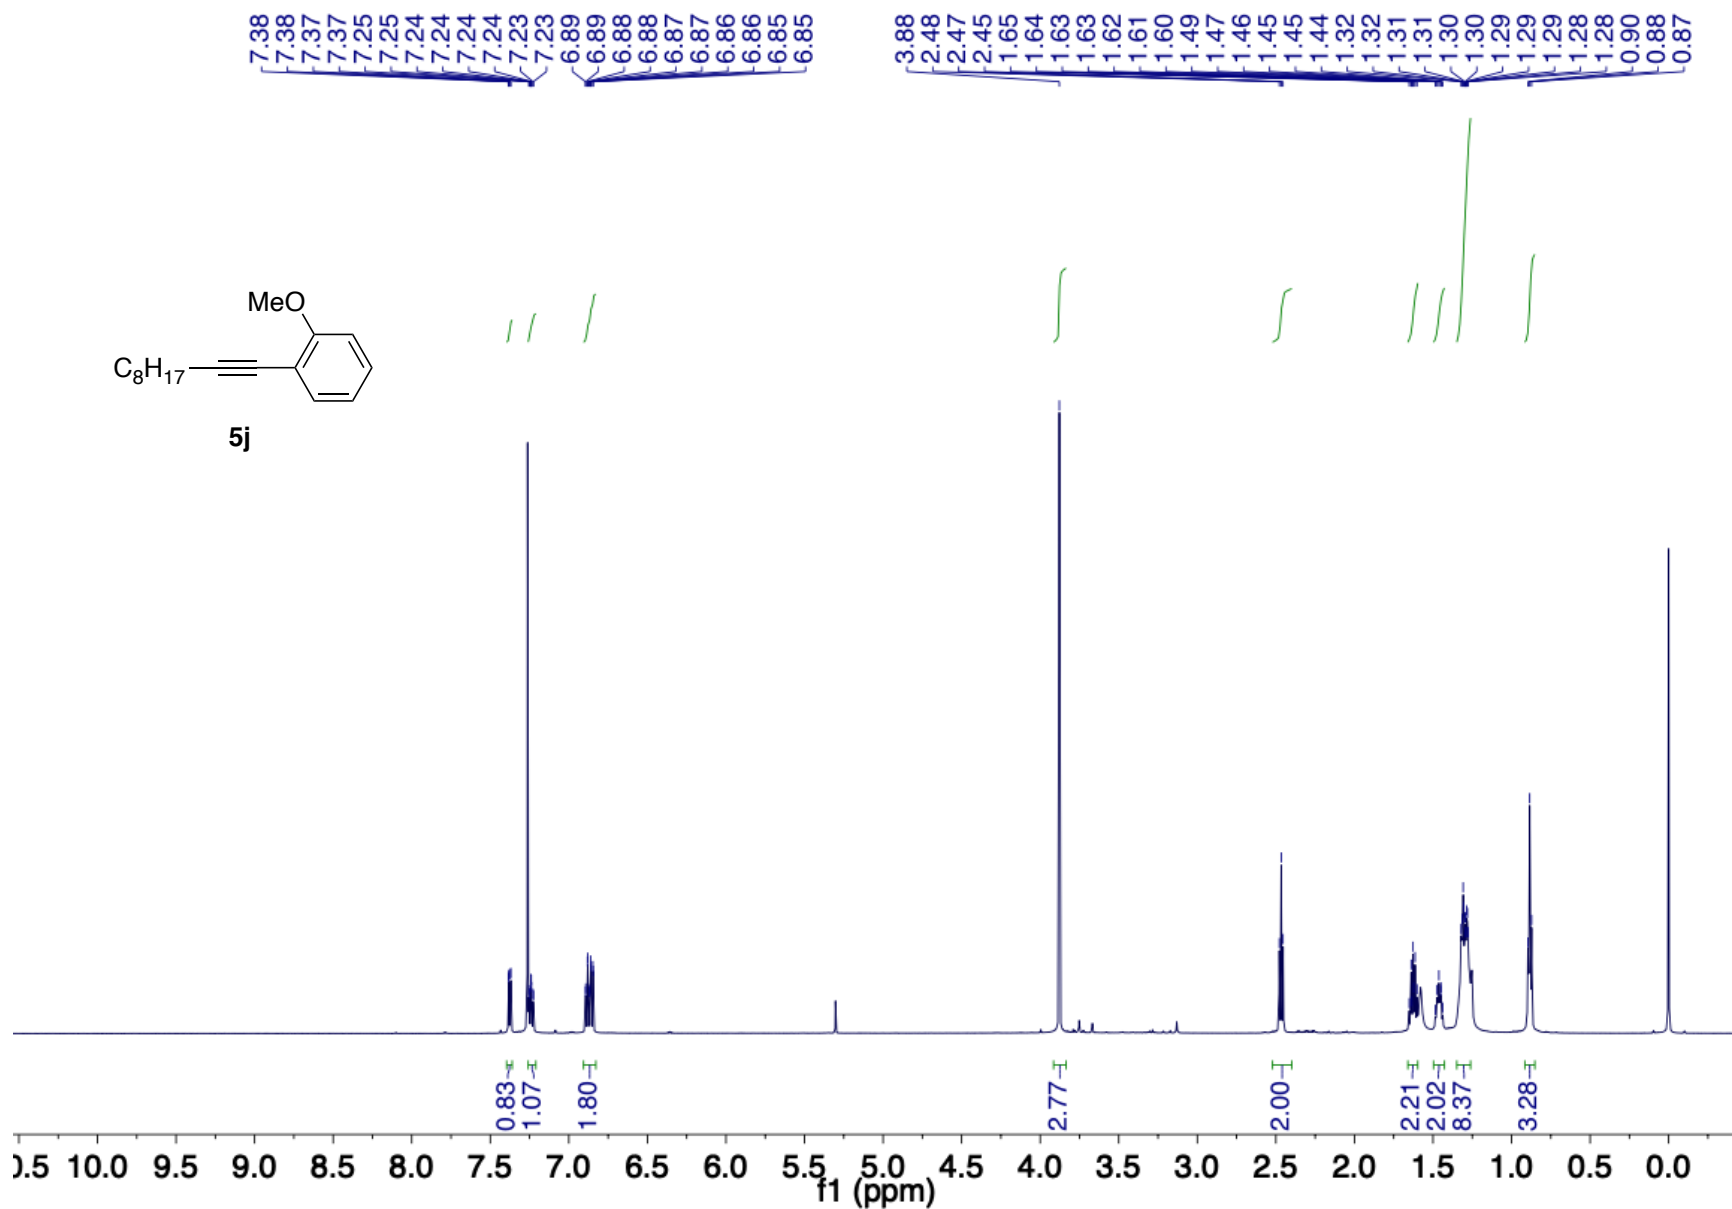

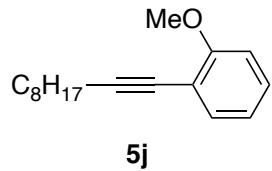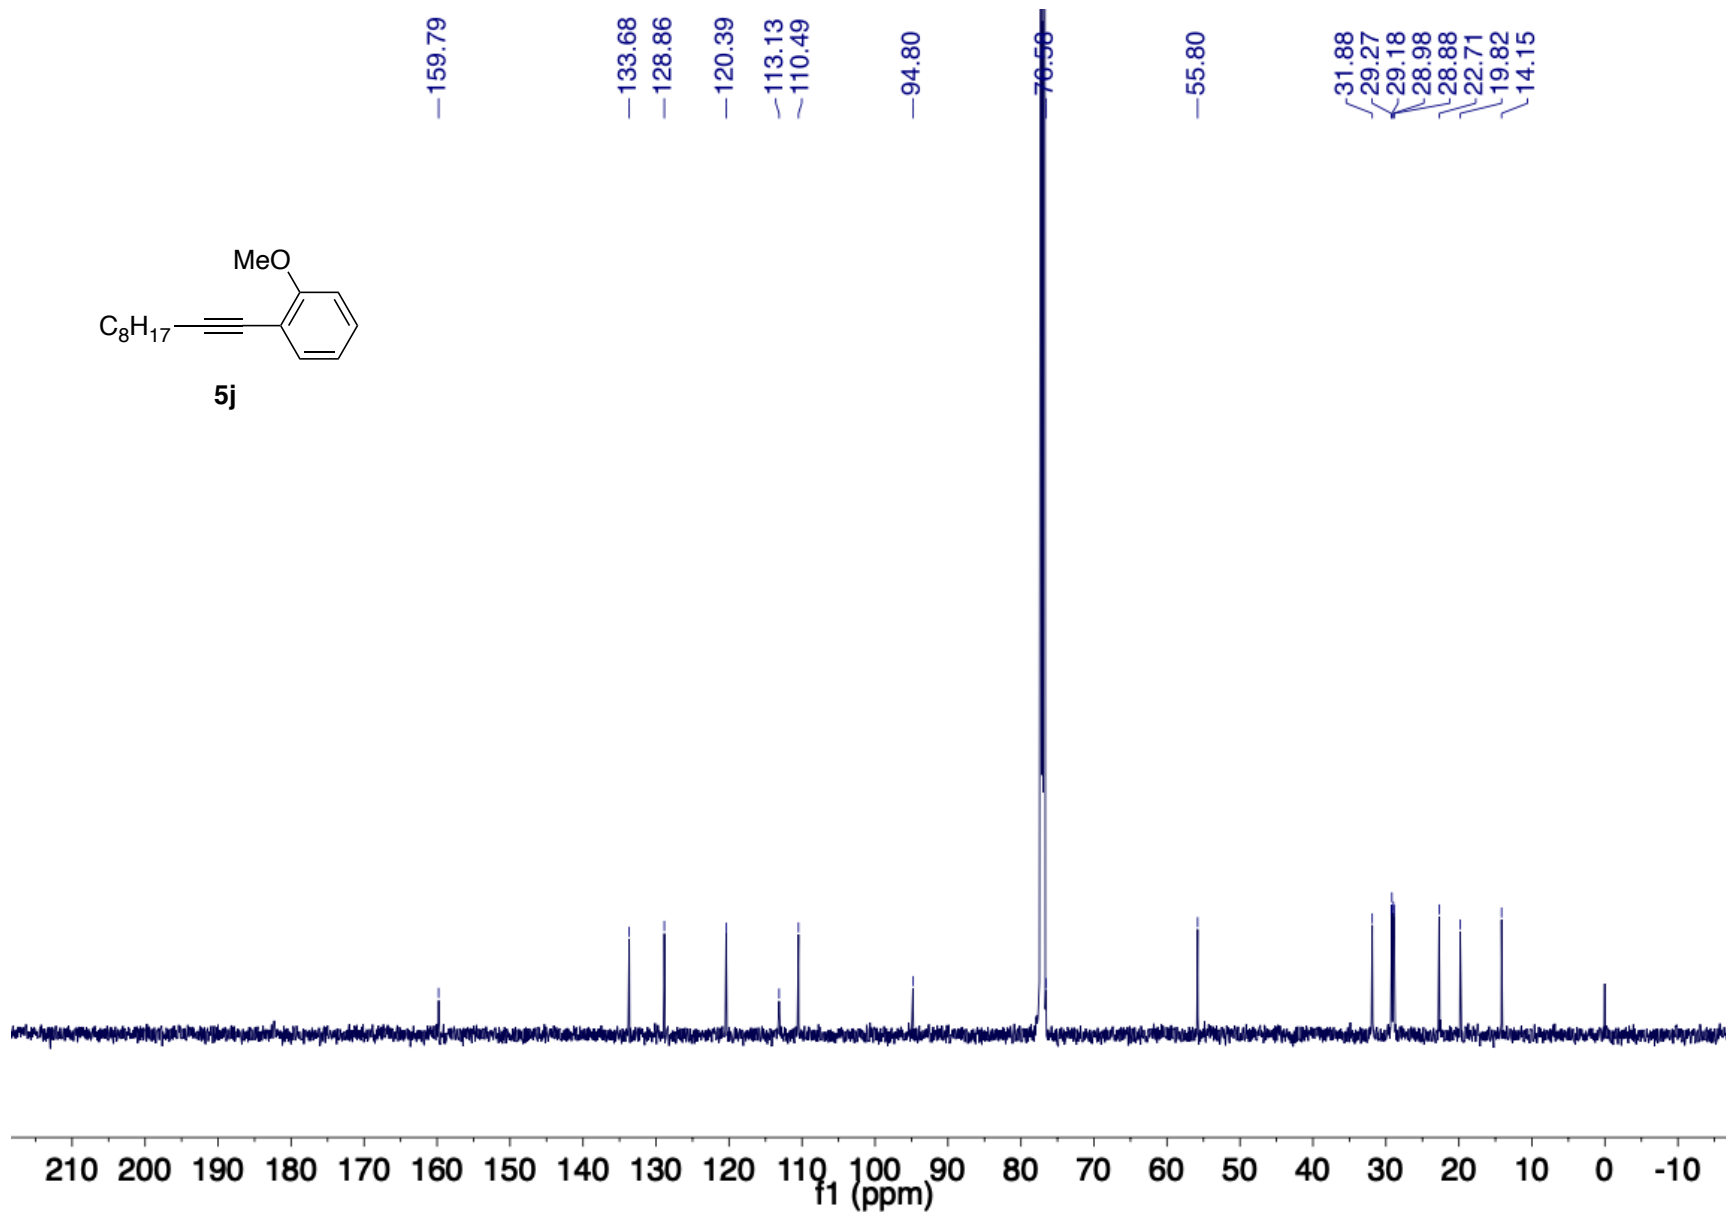

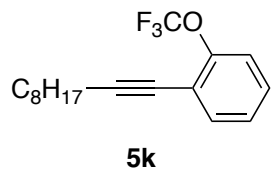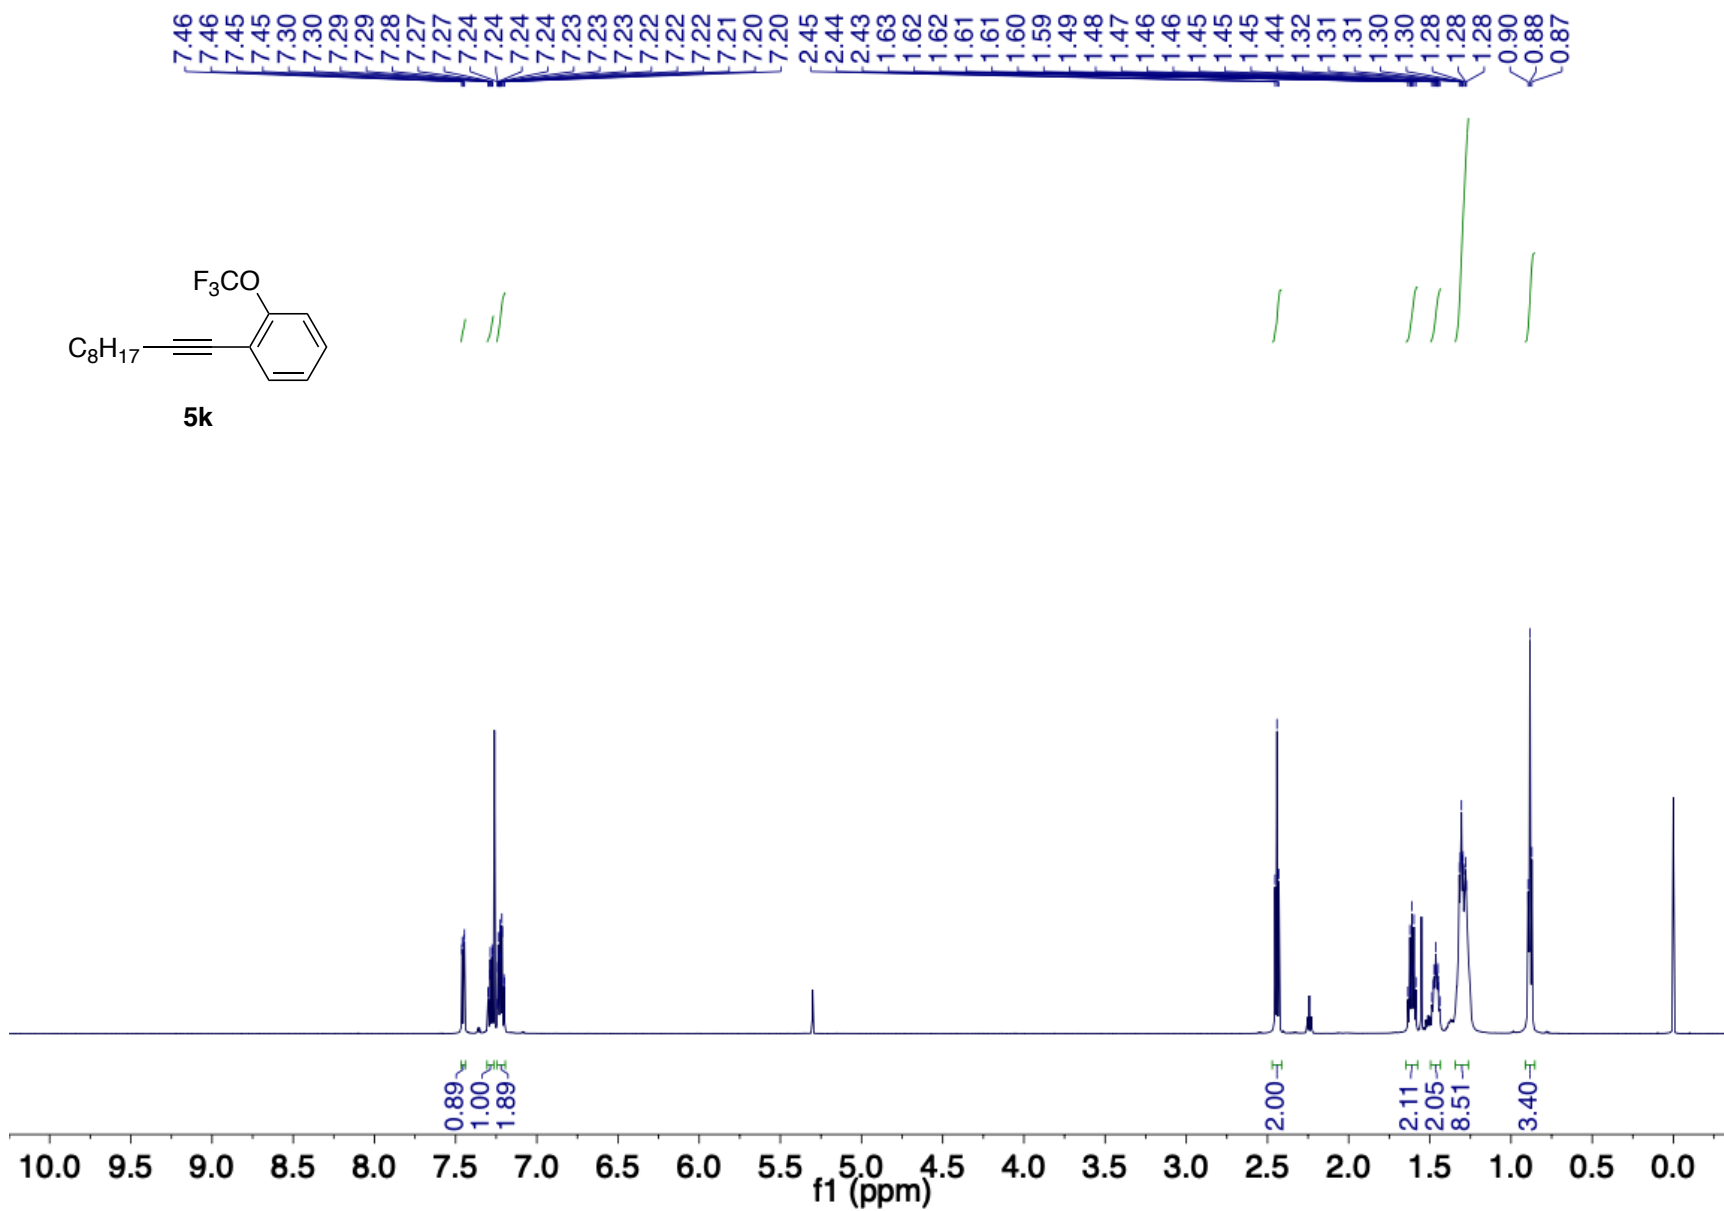

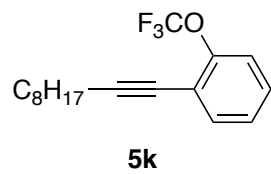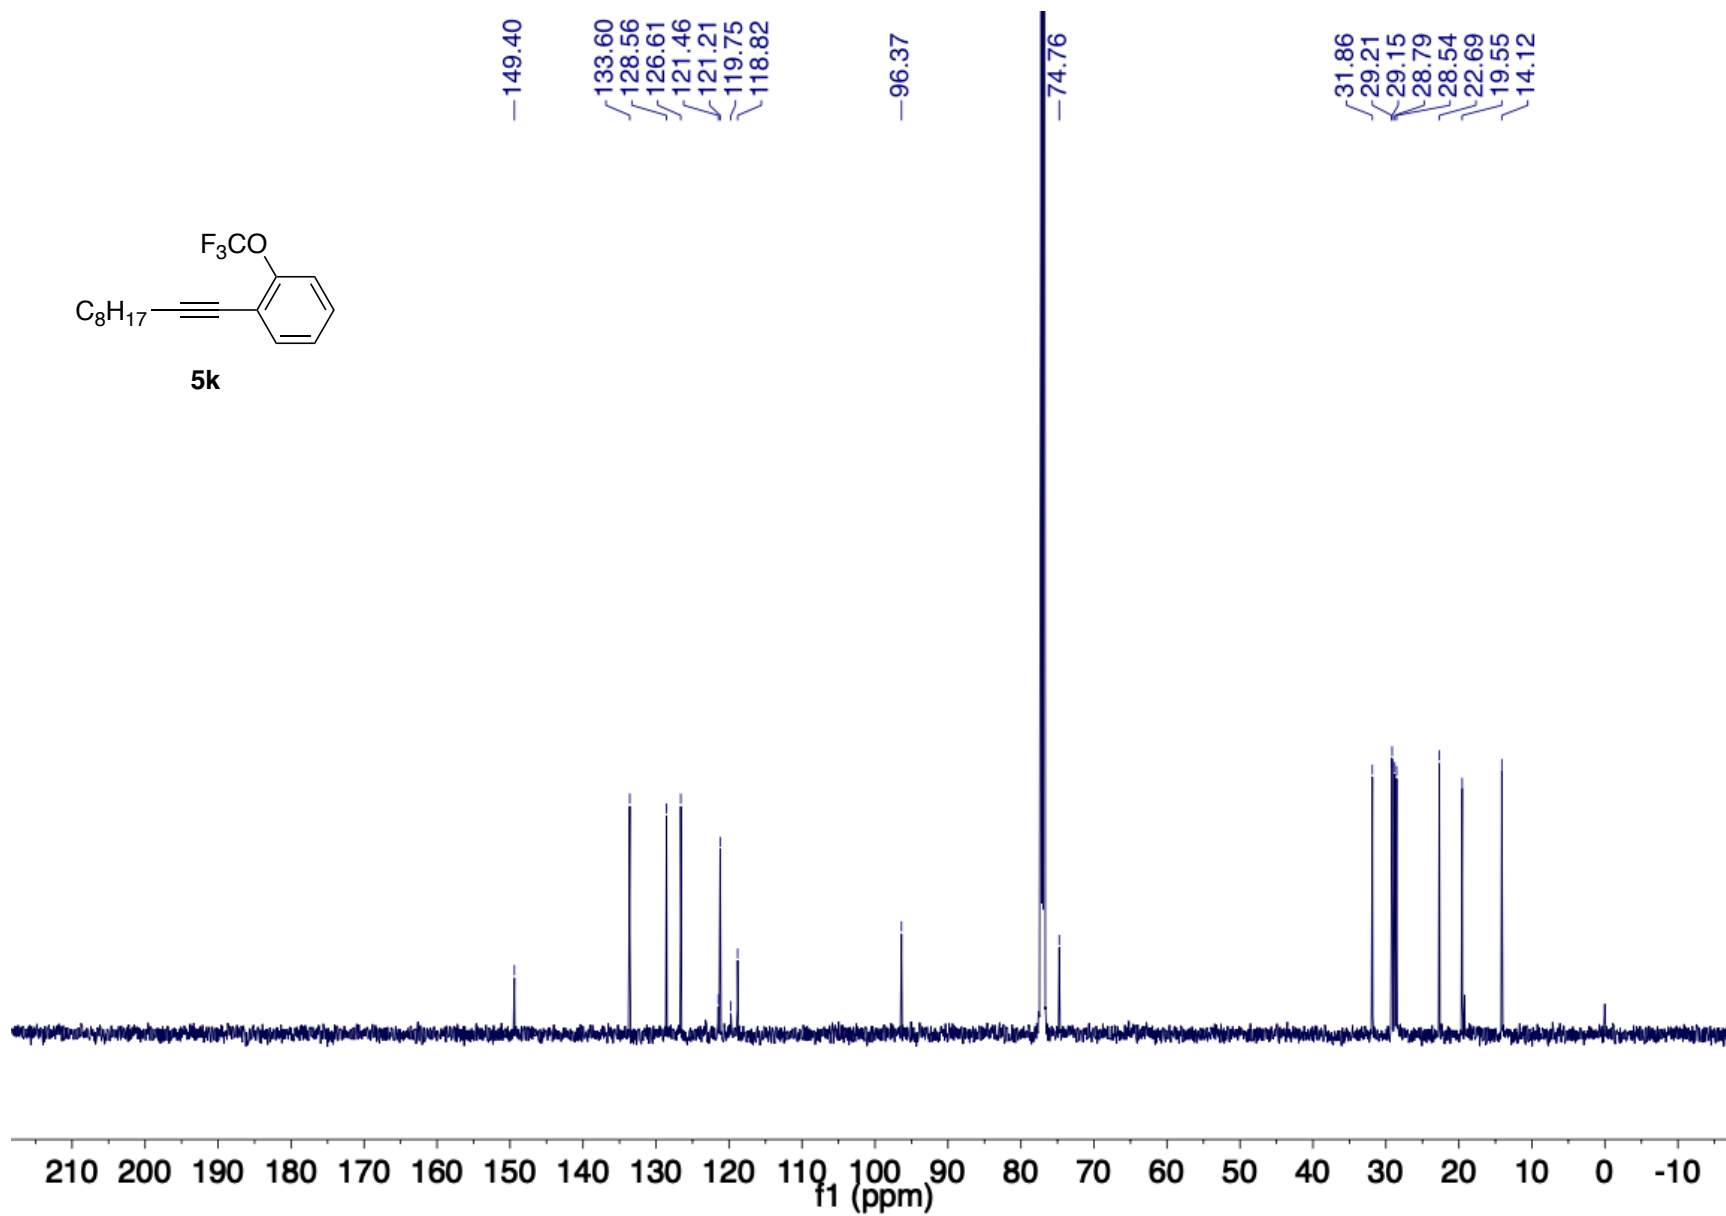

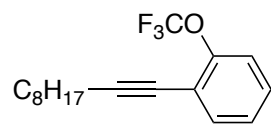

5k

--57.52

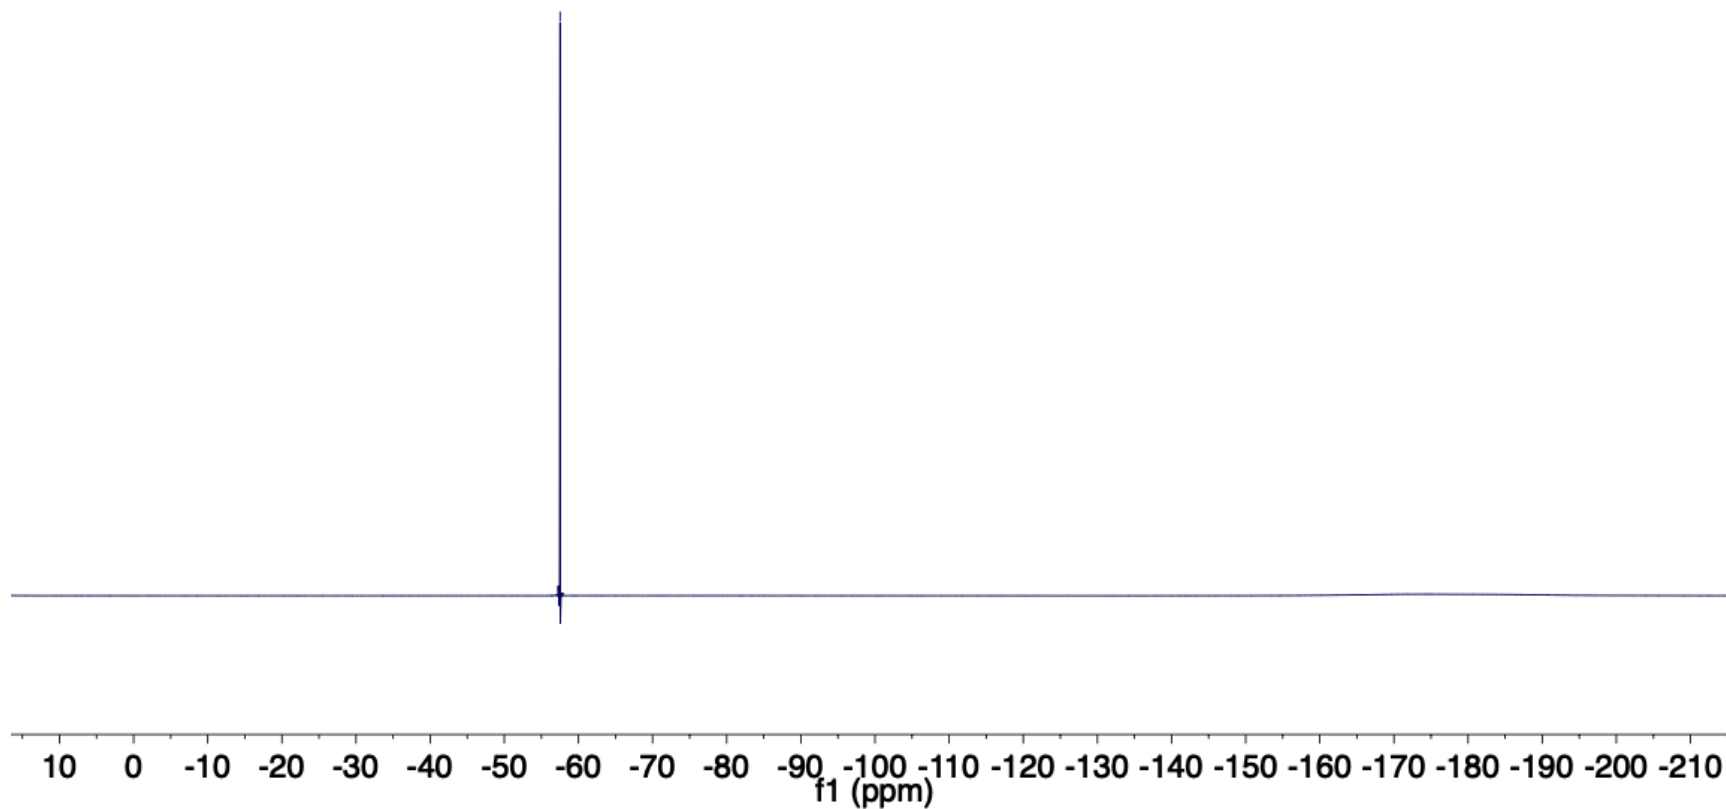

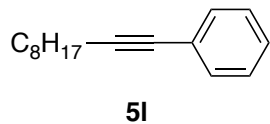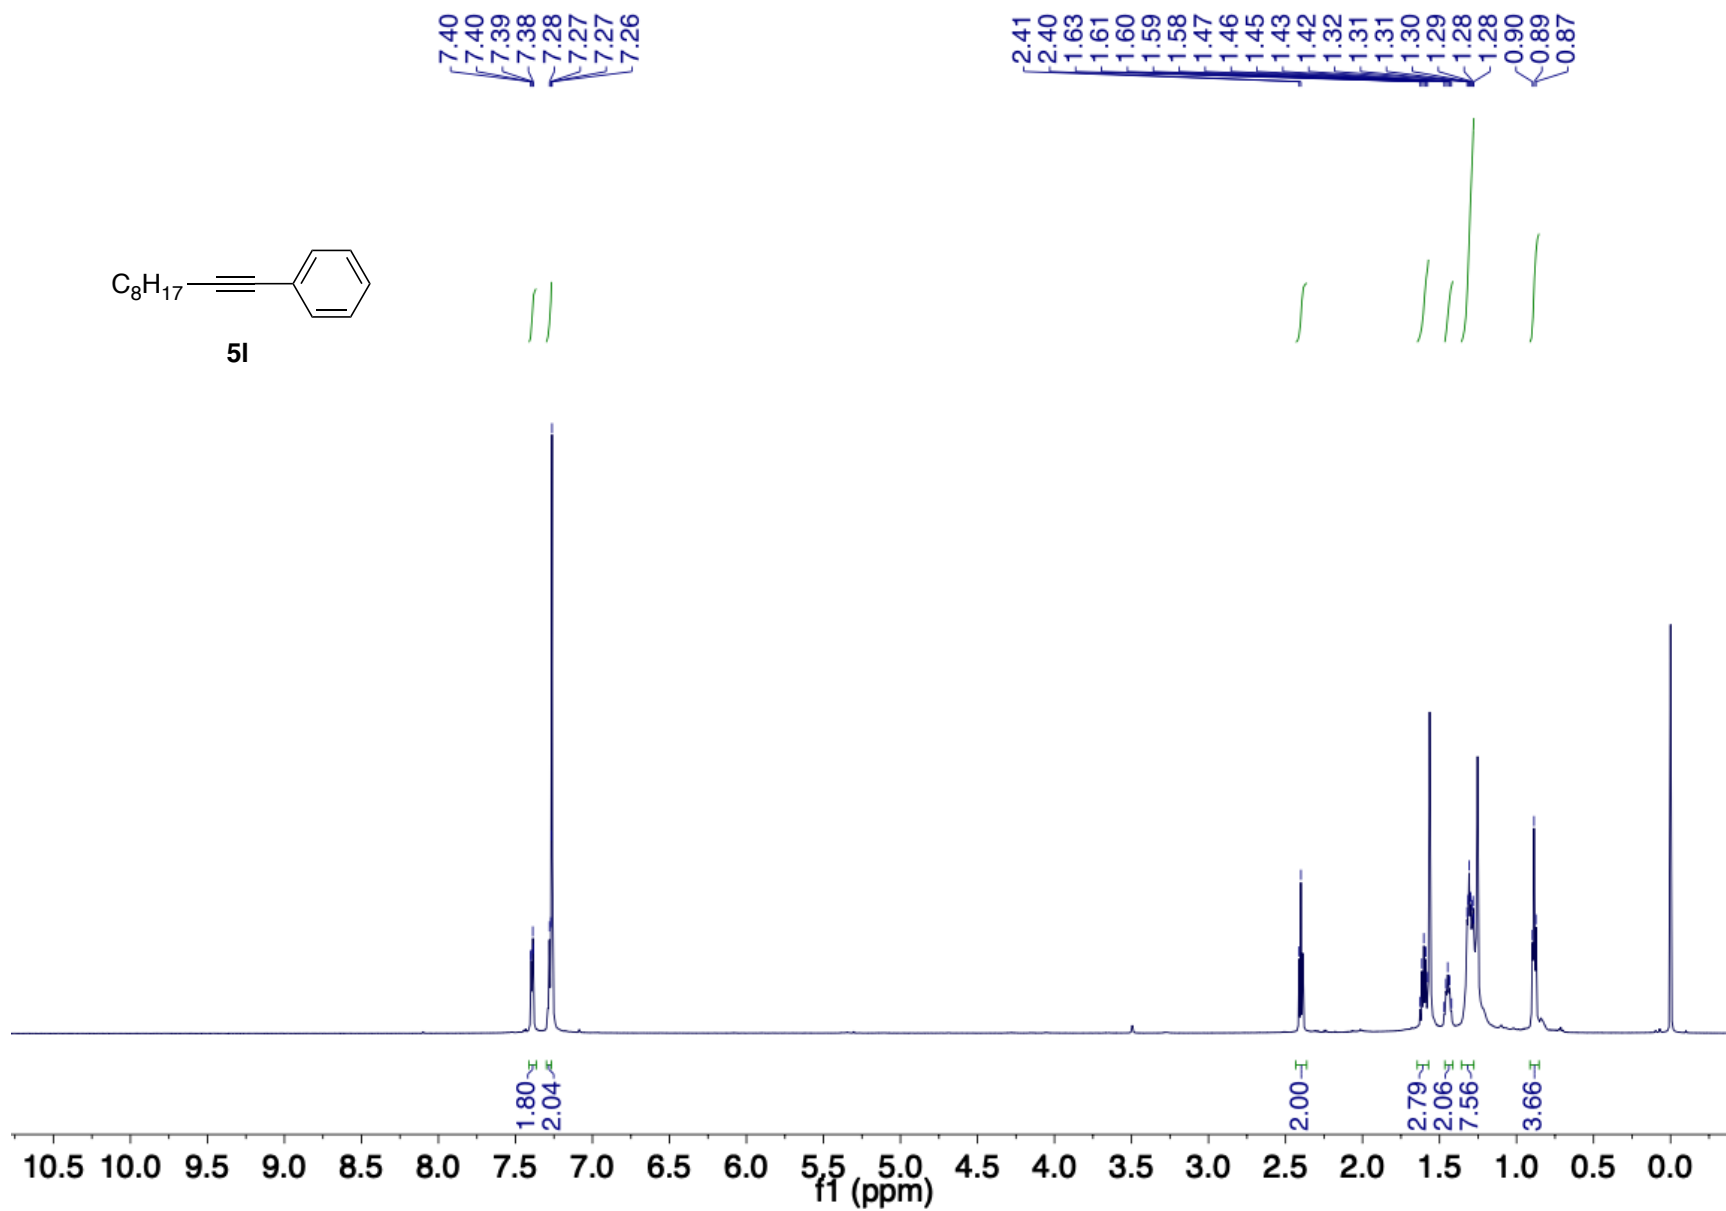



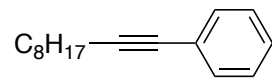

5I

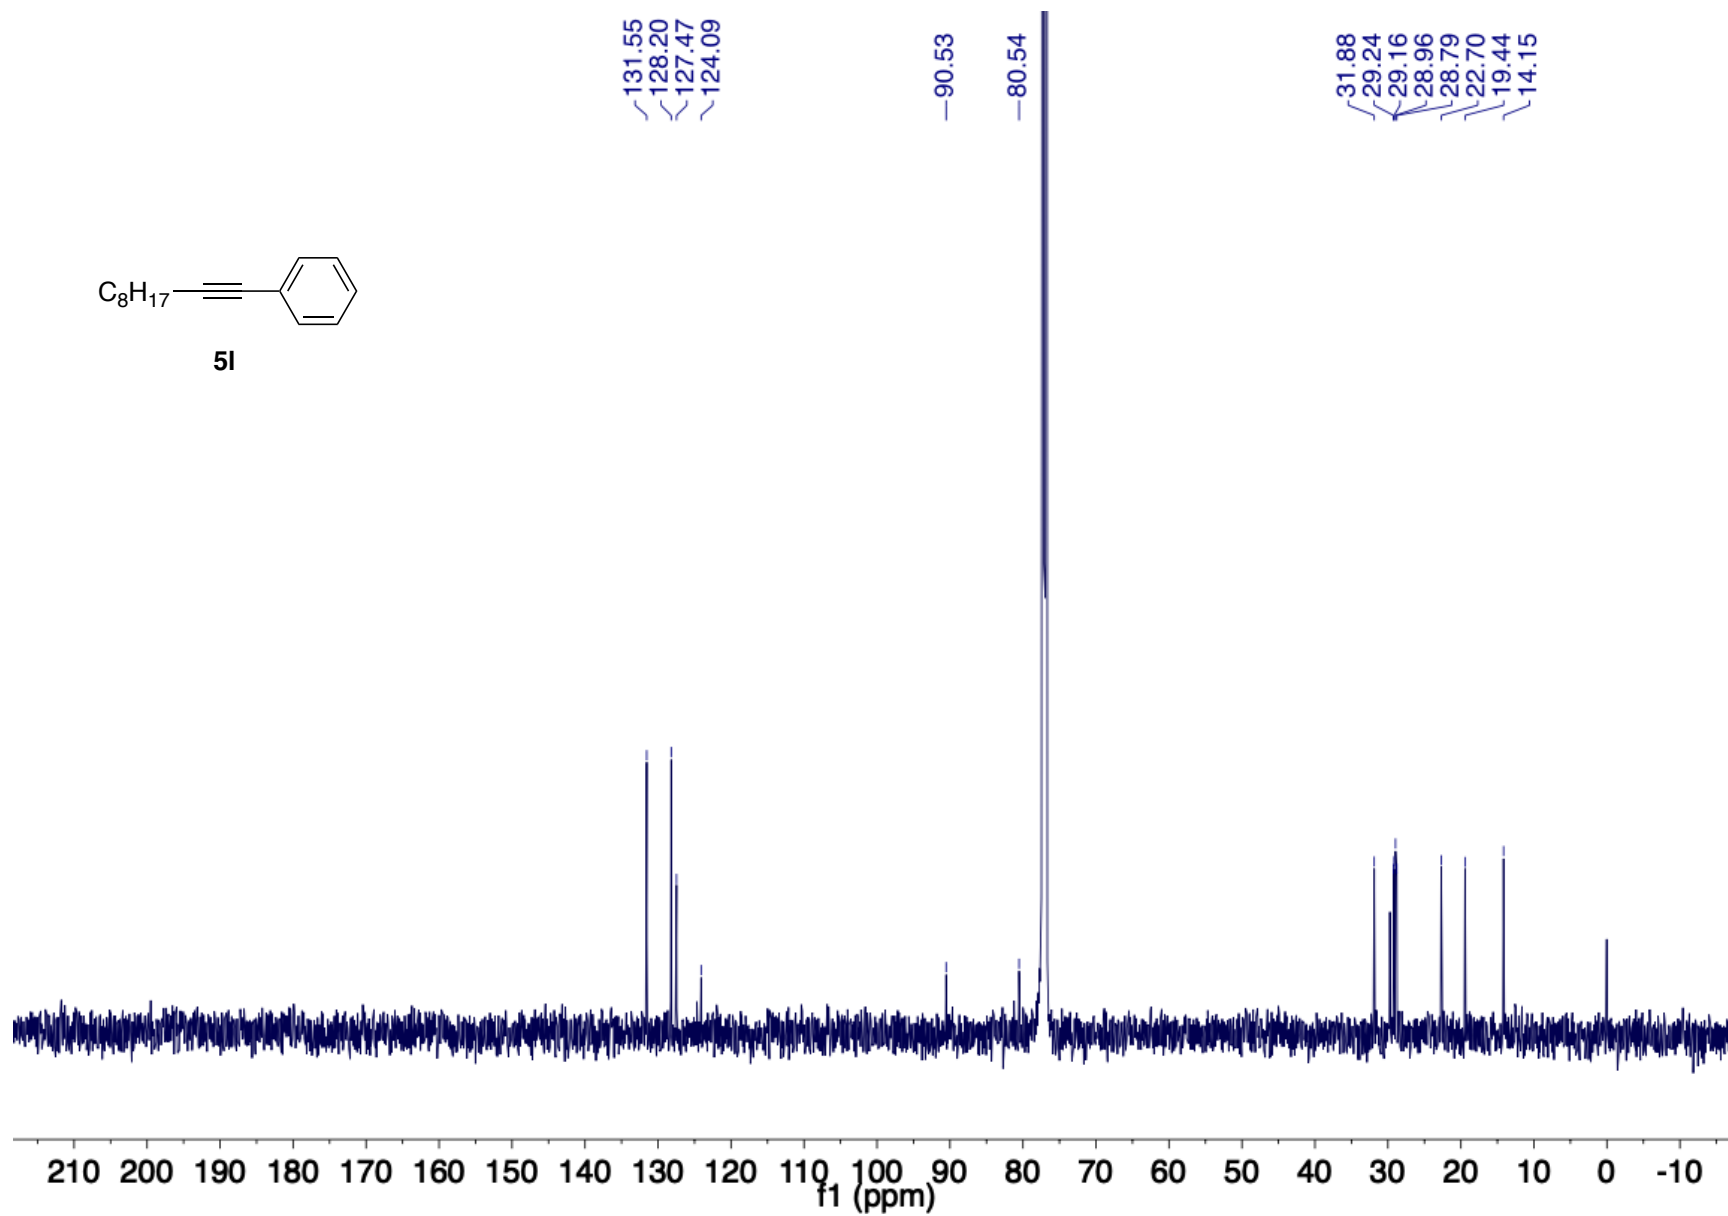

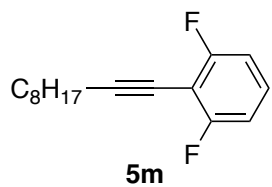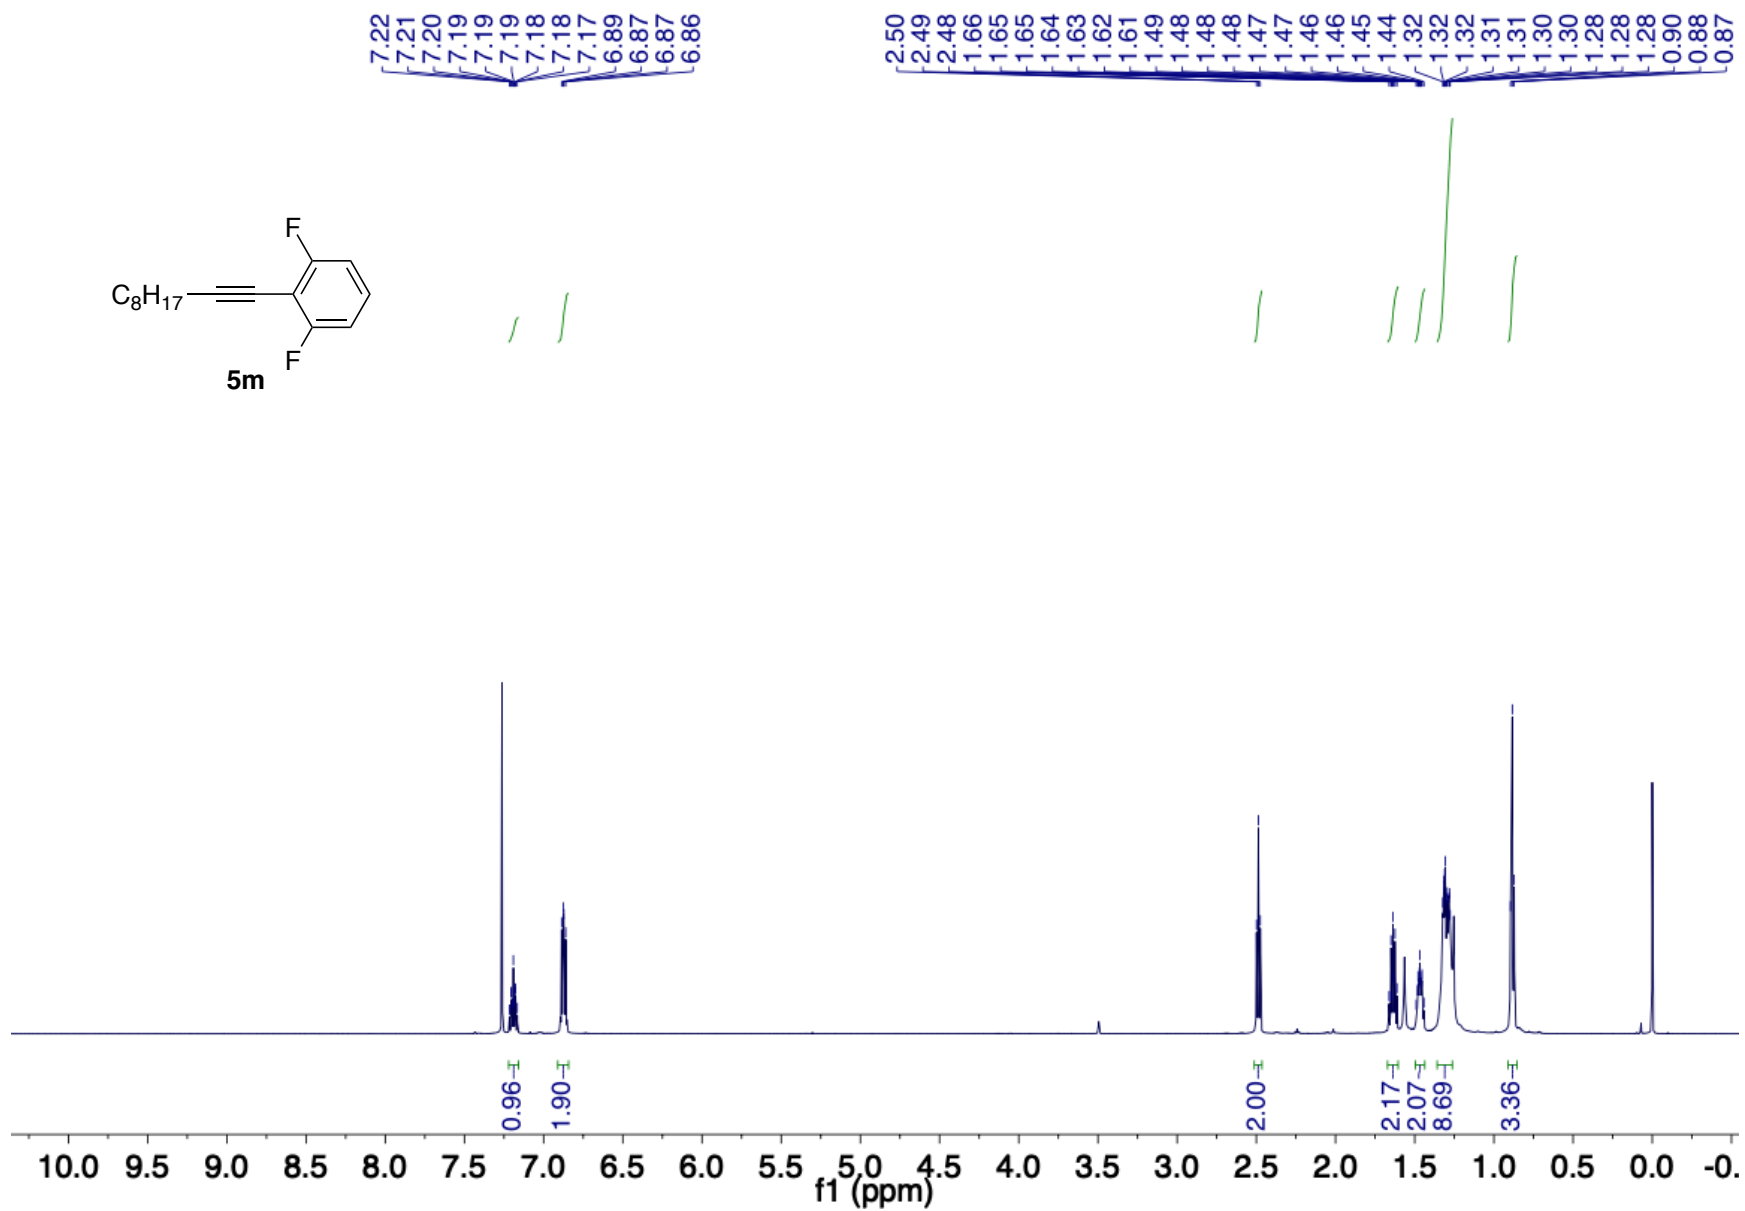

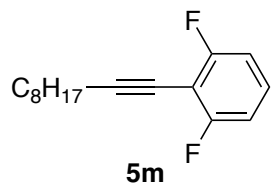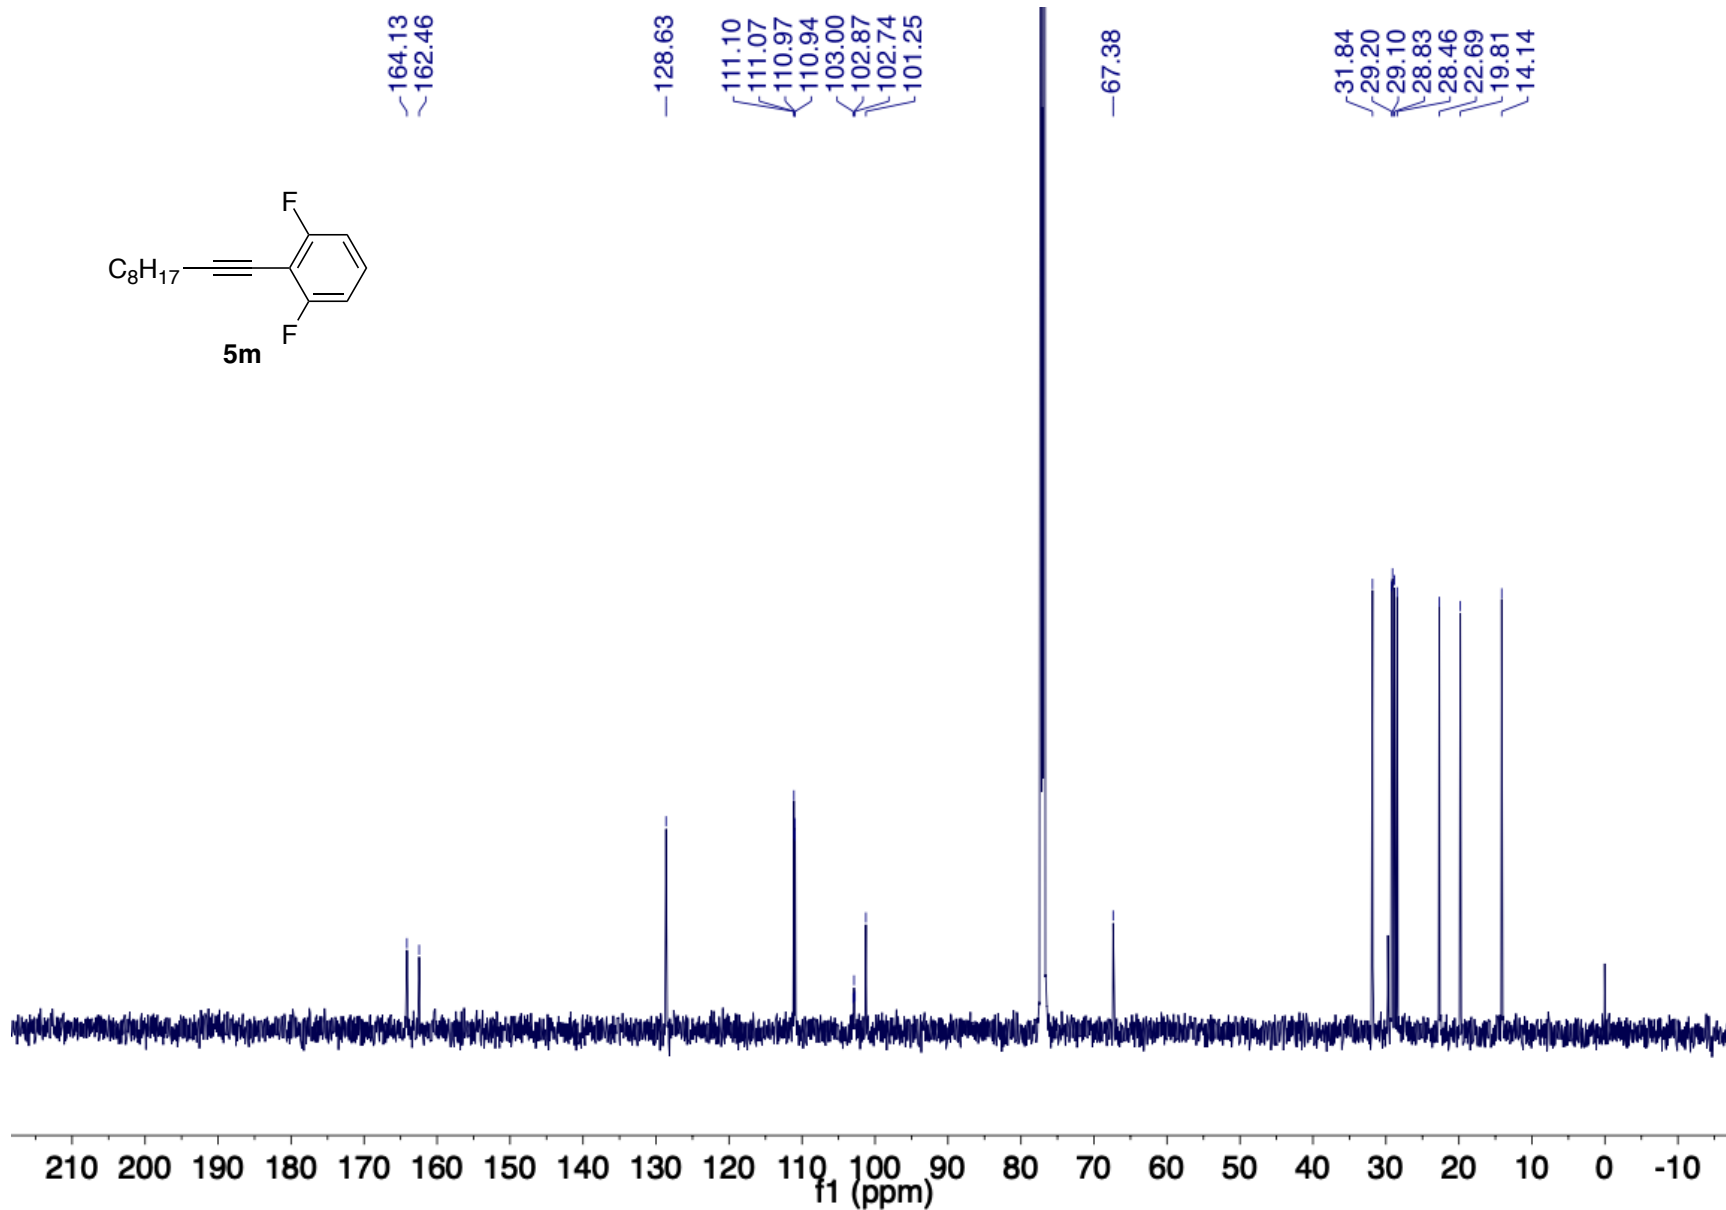

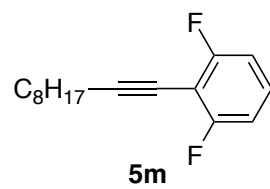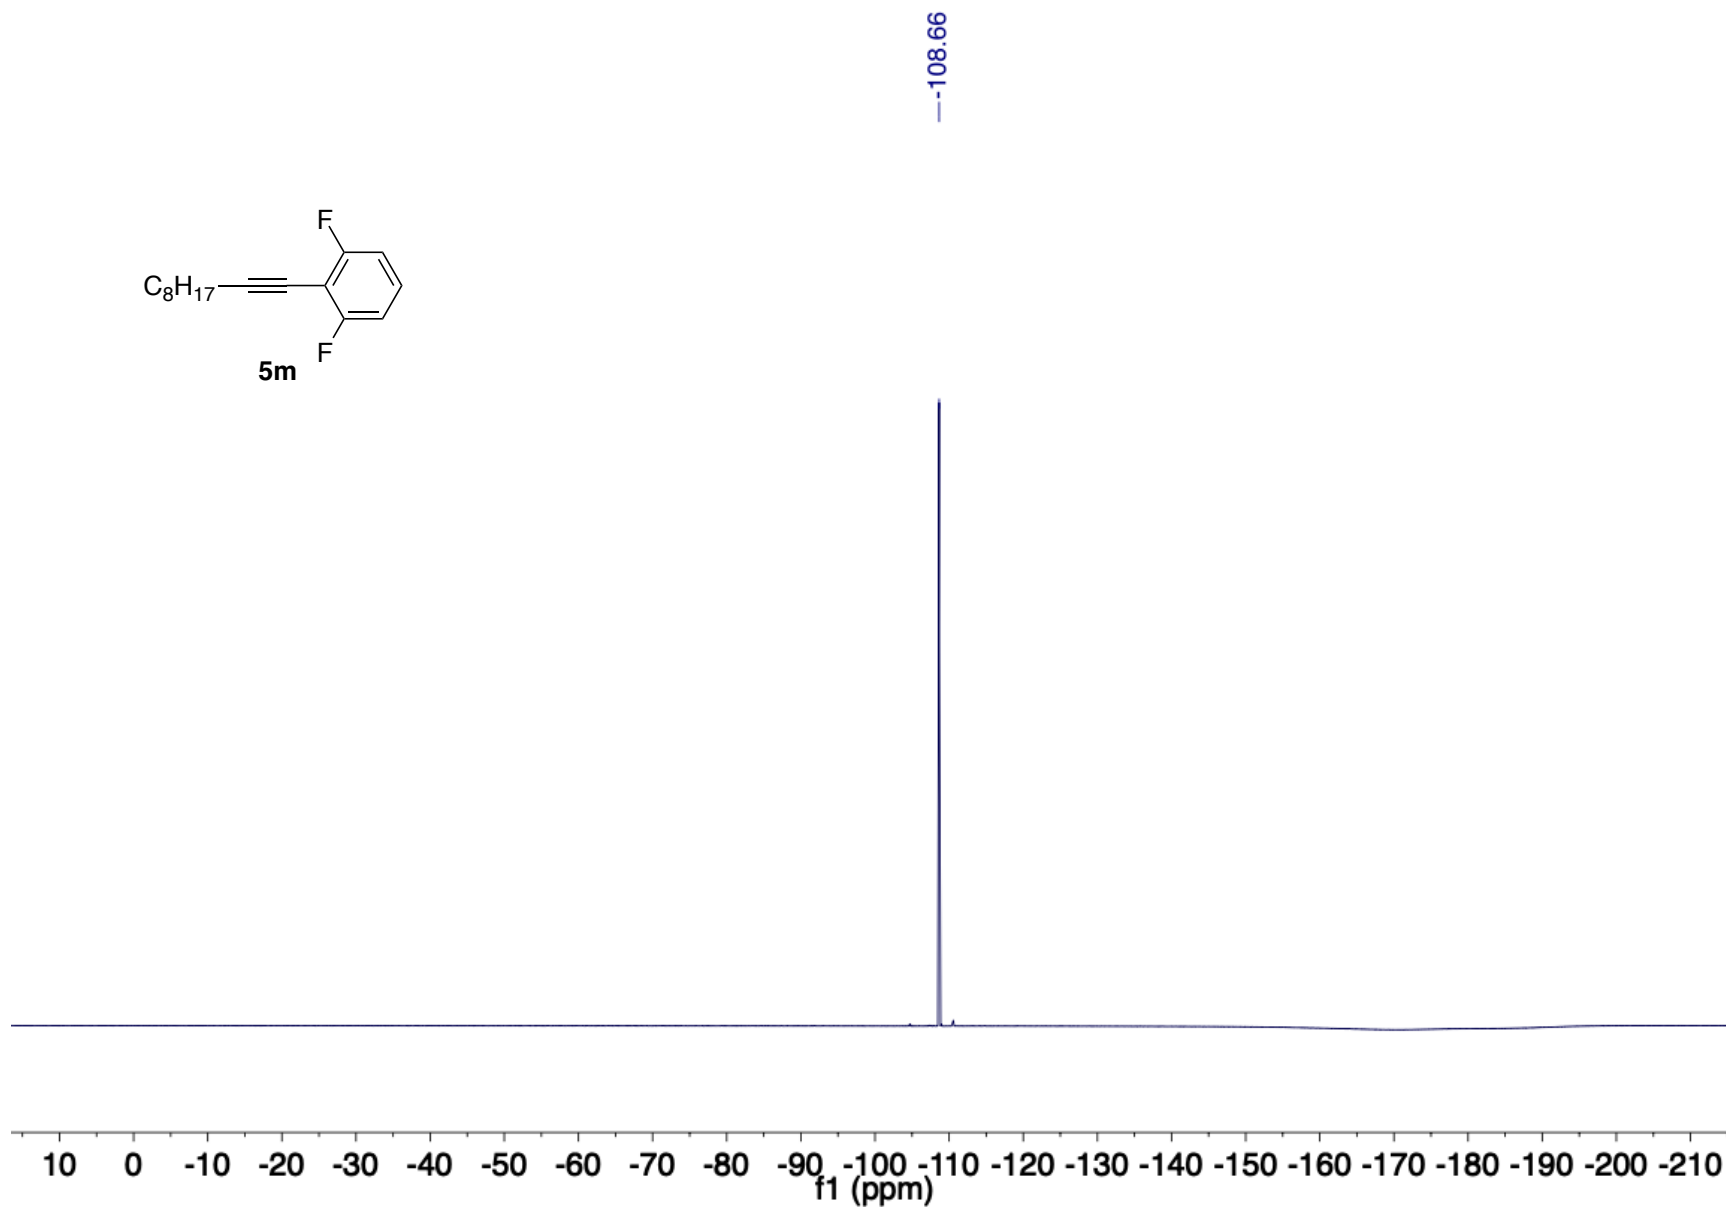

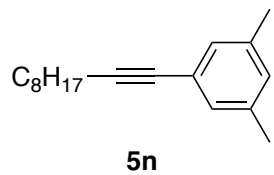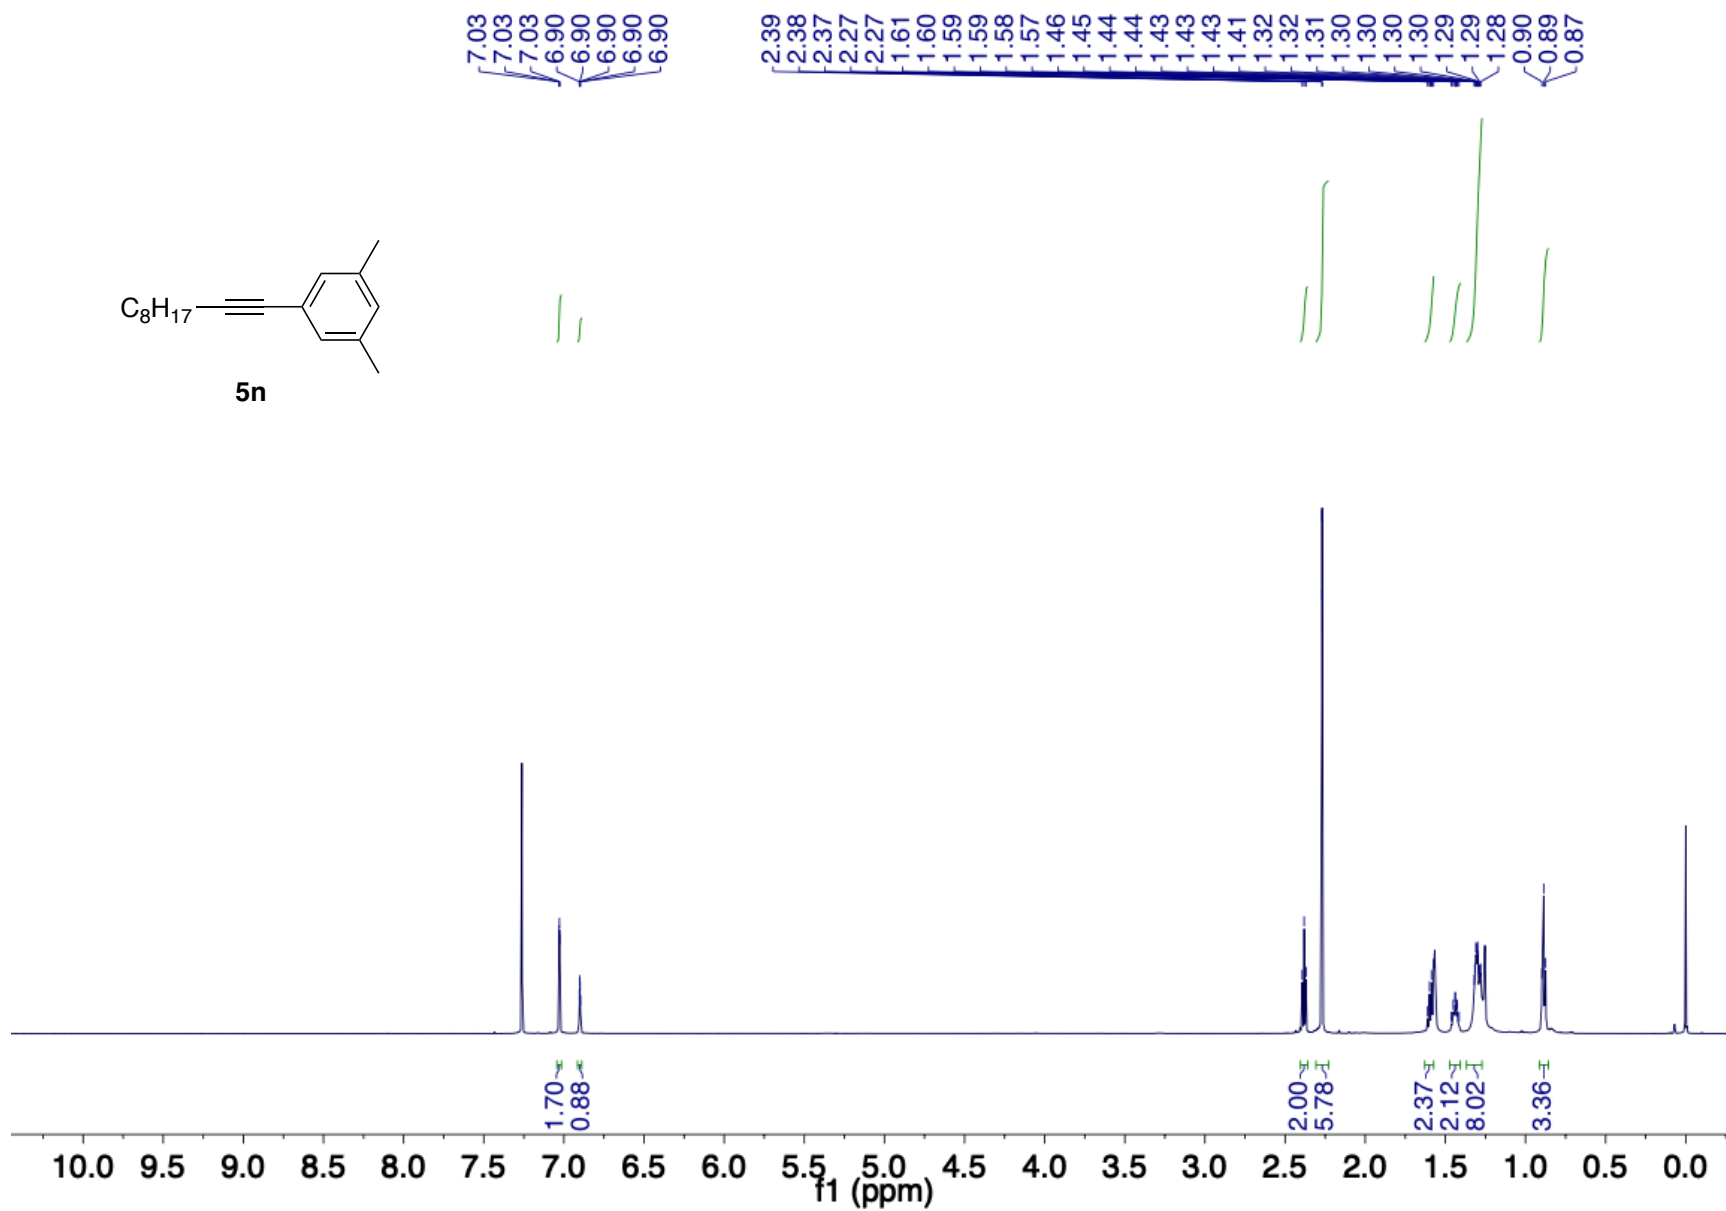

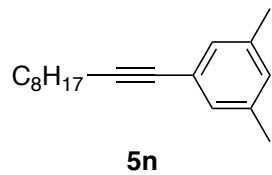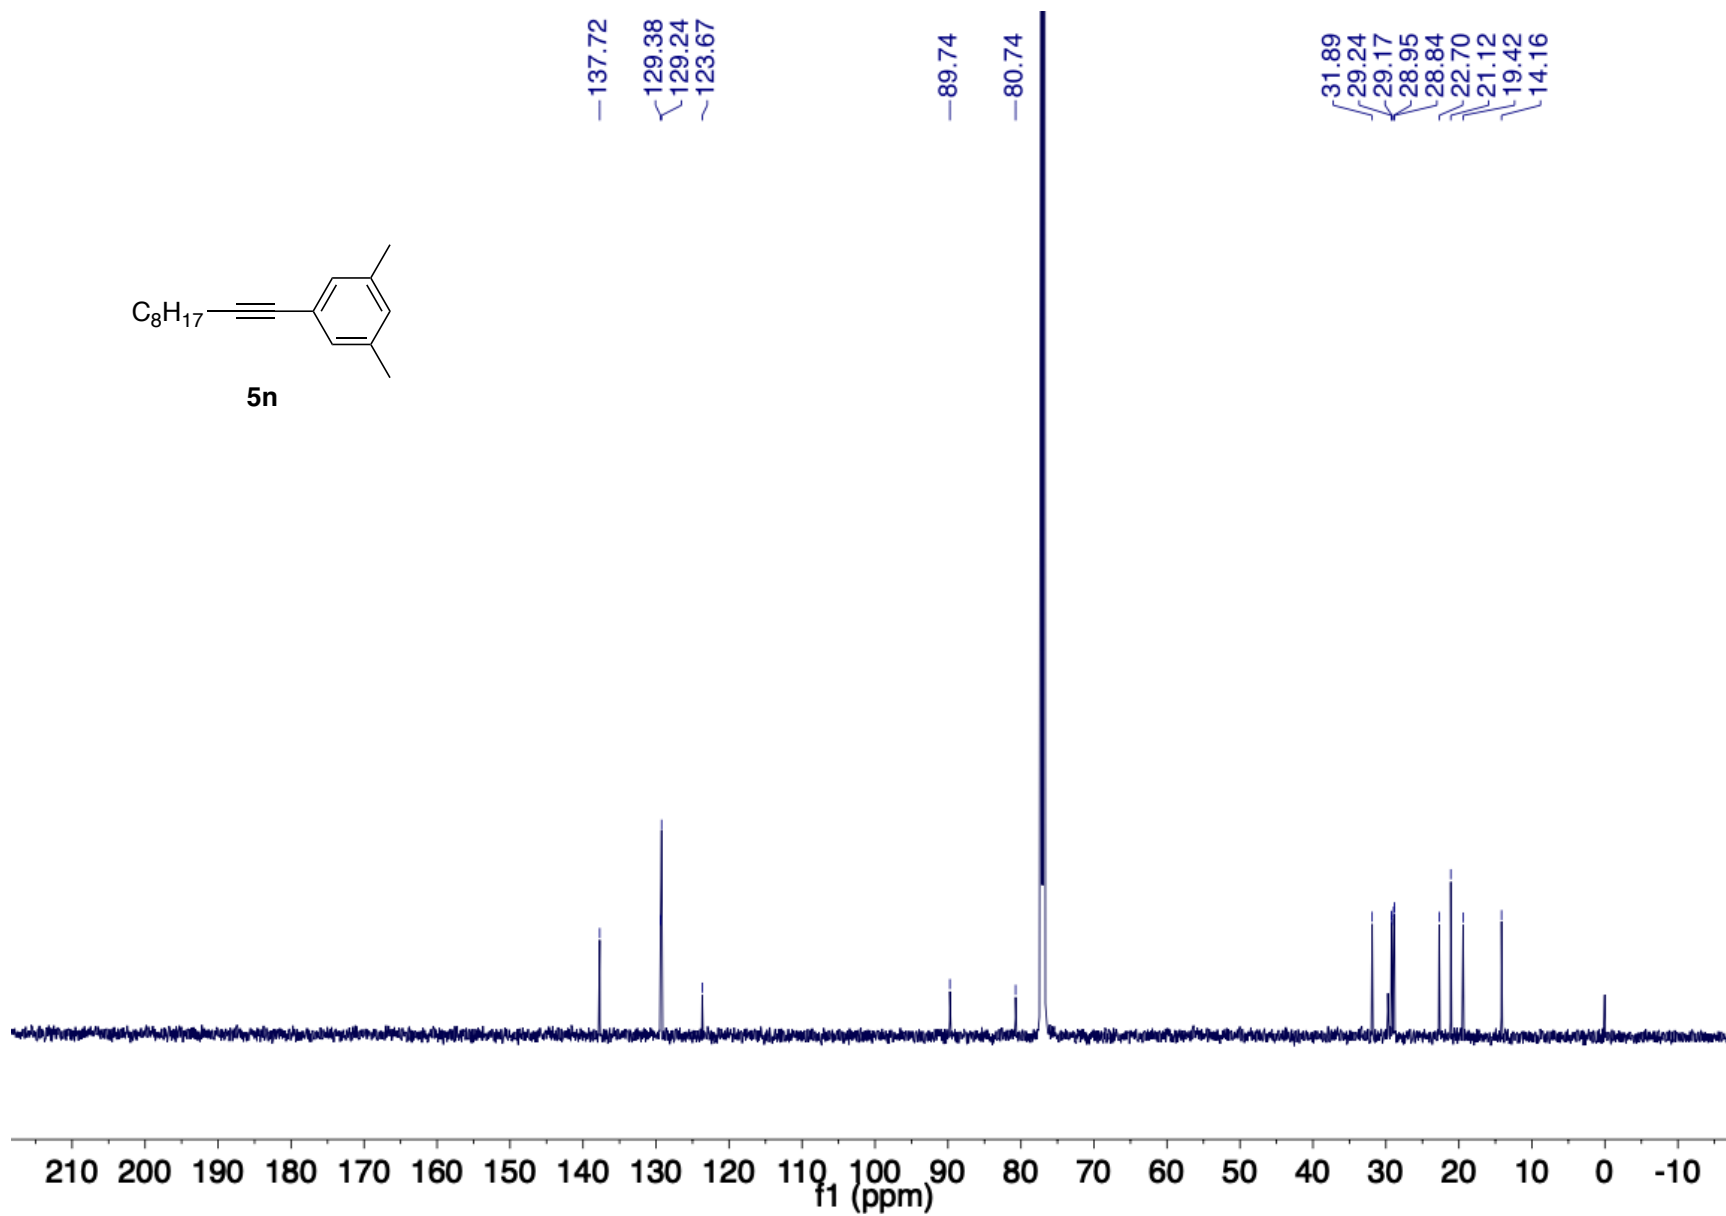

7.63  
7.62  
7.62  
7.61  
7.55  
7.54  
7.53  
7.52  
7.52  
7.40  
7.40  
7.39  
7.38  
7.38  
7.37  
7.37  
7.36  
7.36  
7.35  
7.35  
7.34  
7.34  
7.34  
7.34  
7.34  
7.33  
7.33  
7.32  
7.32  
7.31  
7.31  
7.30  
7.30  
7.30  
7.29  
7.29  
7.16  
7.15  
7.14  
7.14  
7.13  
7.13  
7.12  
7.12  
7.11  
7.11  
7.10

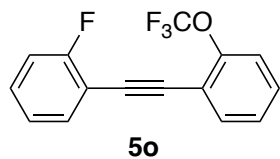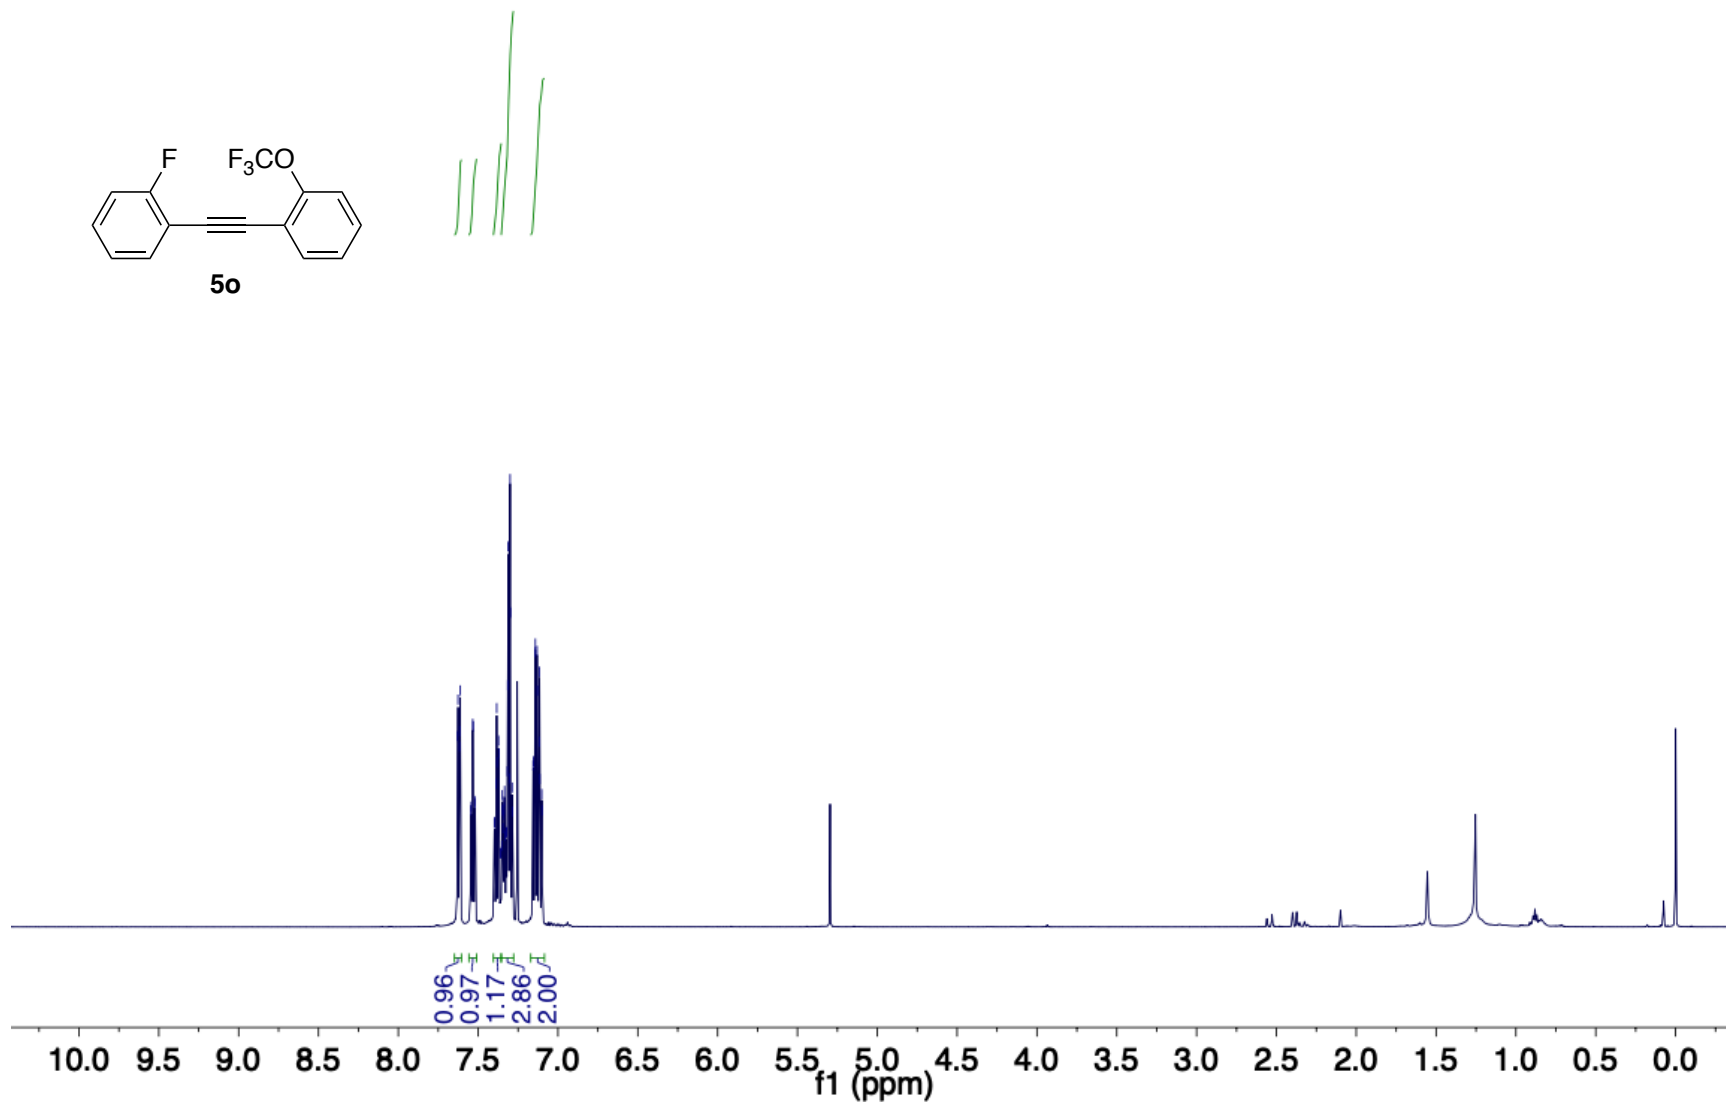

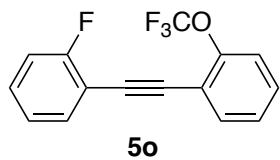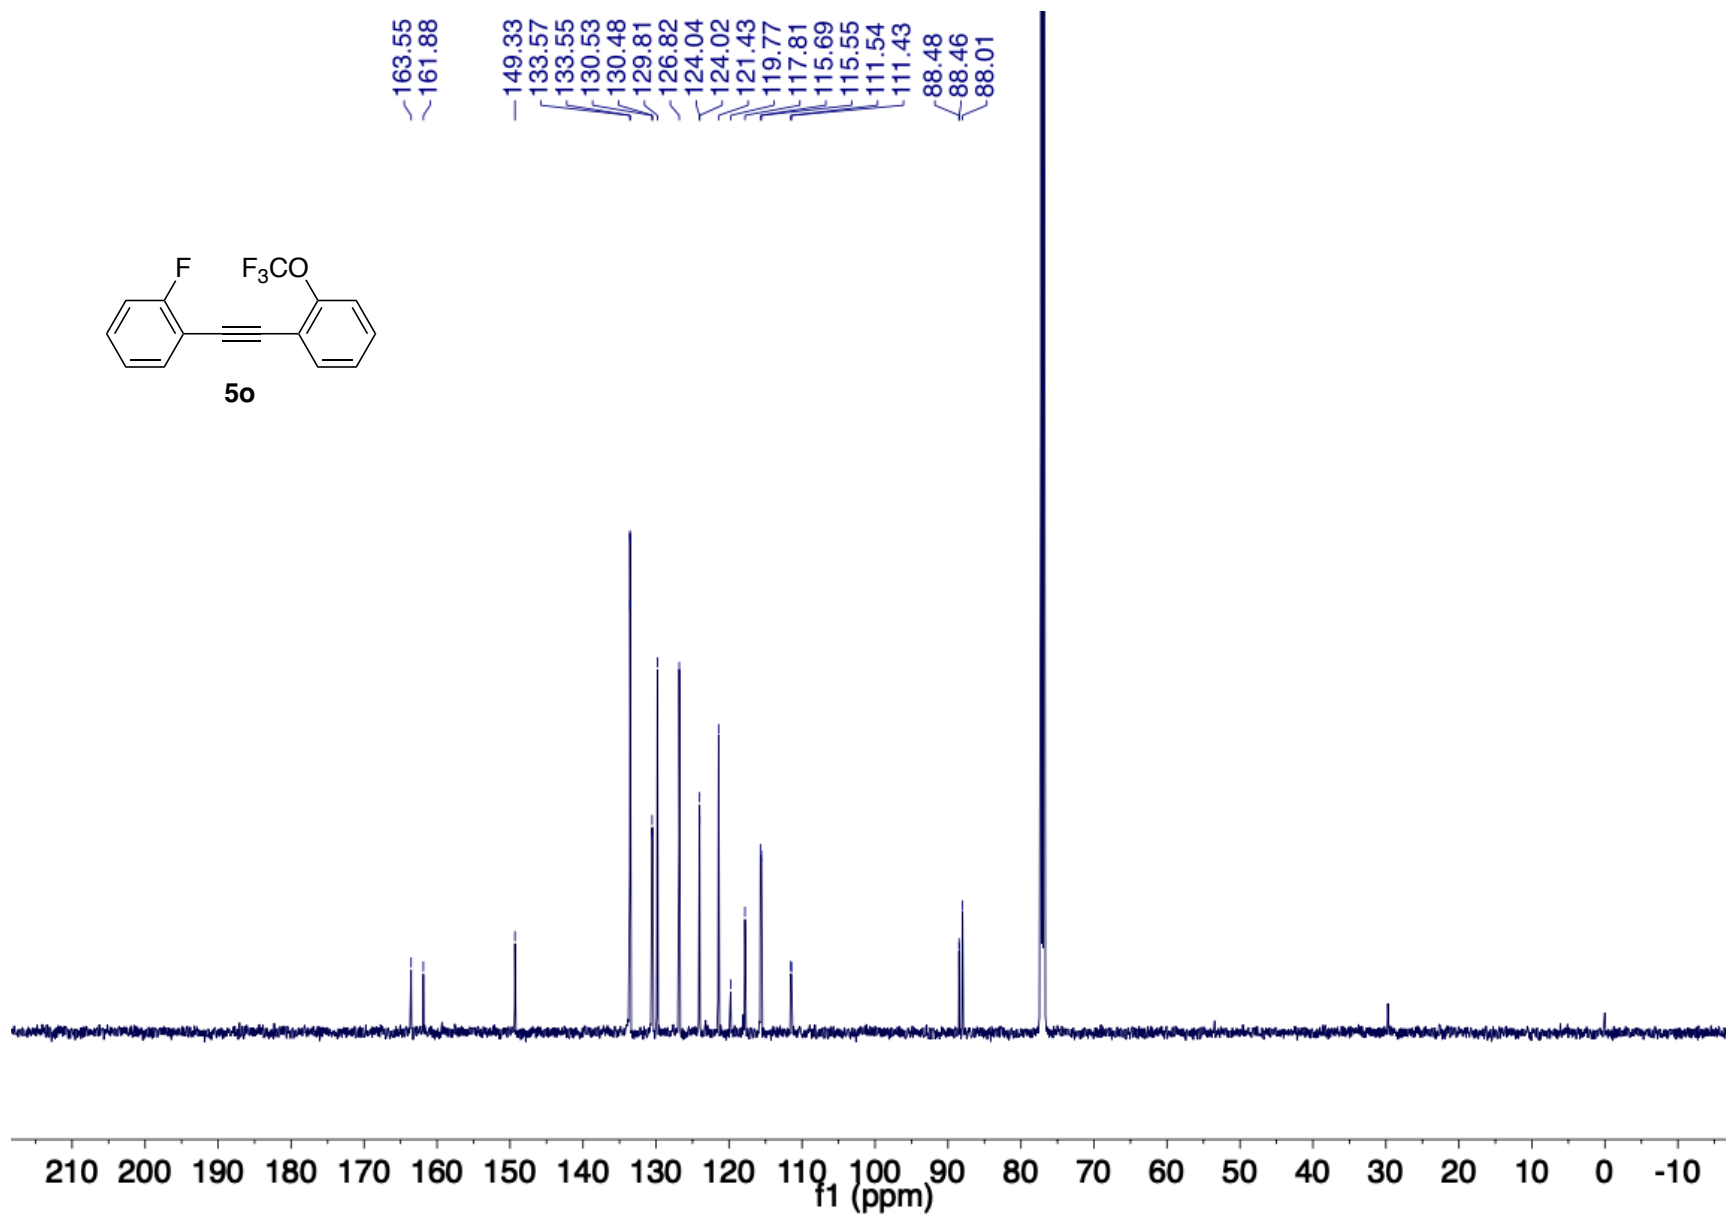



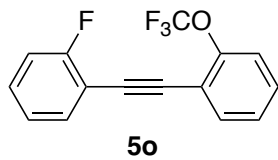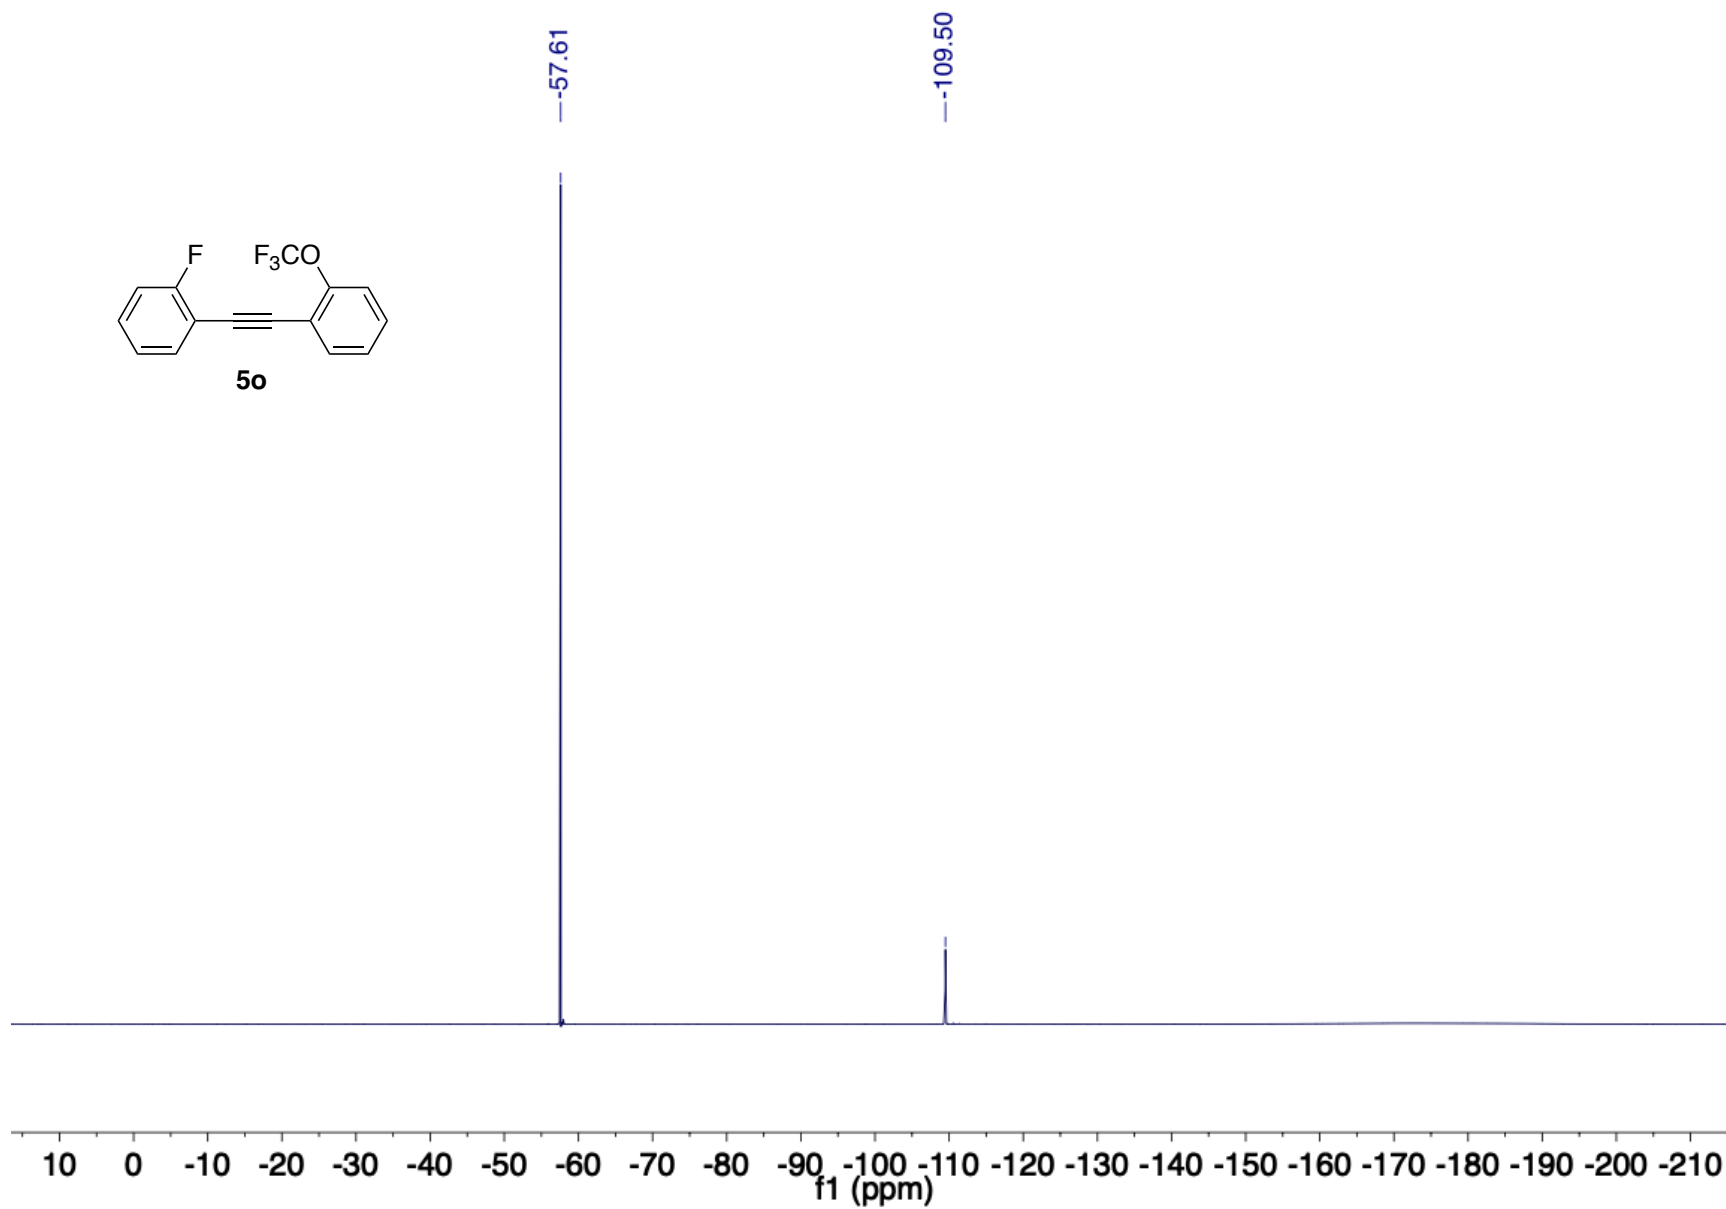

7.60  
7.59  
7.58  
7.58  
7.40  
7.40  
7.39  
7.38  
7.37  
7.37  
7.34  
7.33  
7.33  
7.33  
7.33  
7.32  
7.32  
7.31  
7.31  
7.31  
7.30  
7.30  
7.29  
7.29  
7.29  
7.25  
7.25  
7.24  
7.24  
7.23  
7.23  
7.23  
7.23  
7.23  
7.09  
7.08  
7.08  
7.08  
7.07  
7.07  
7.06  
7.06  
7.06  
7.05

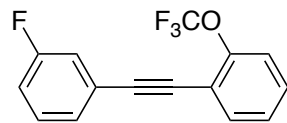

5p

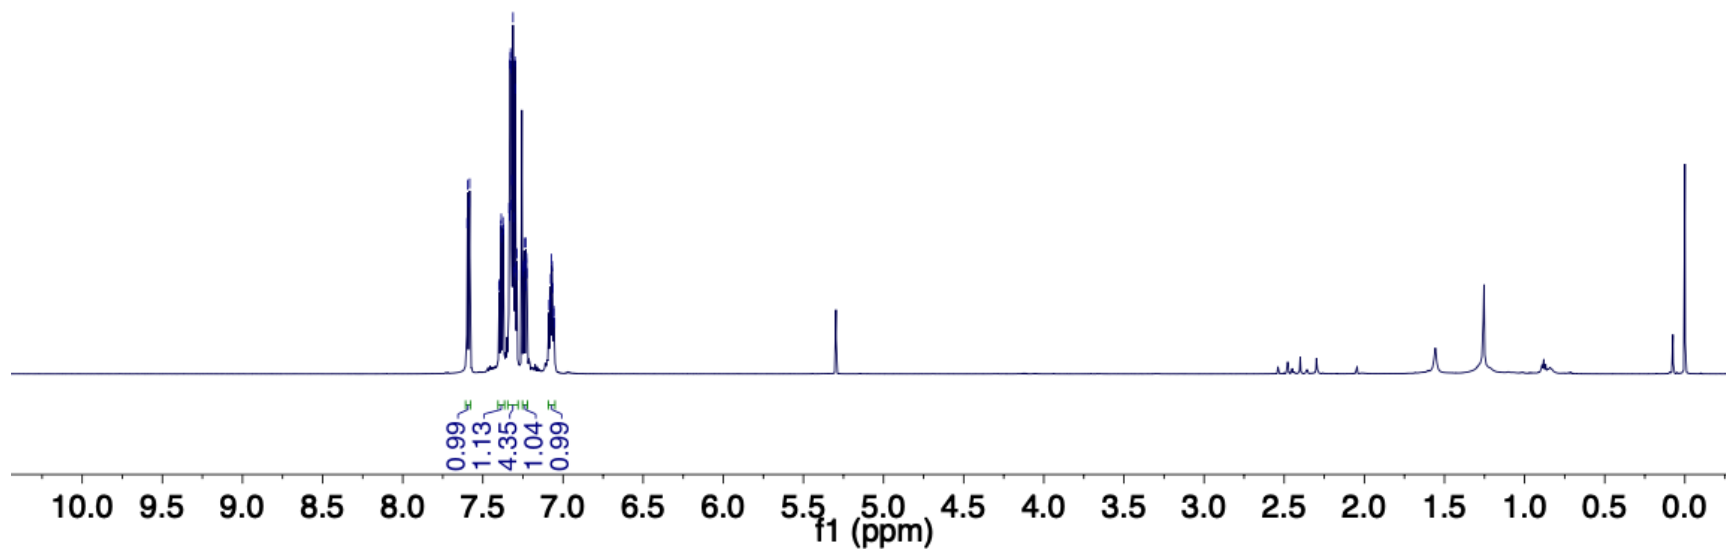

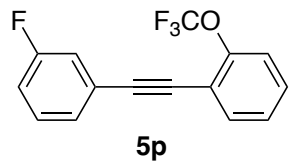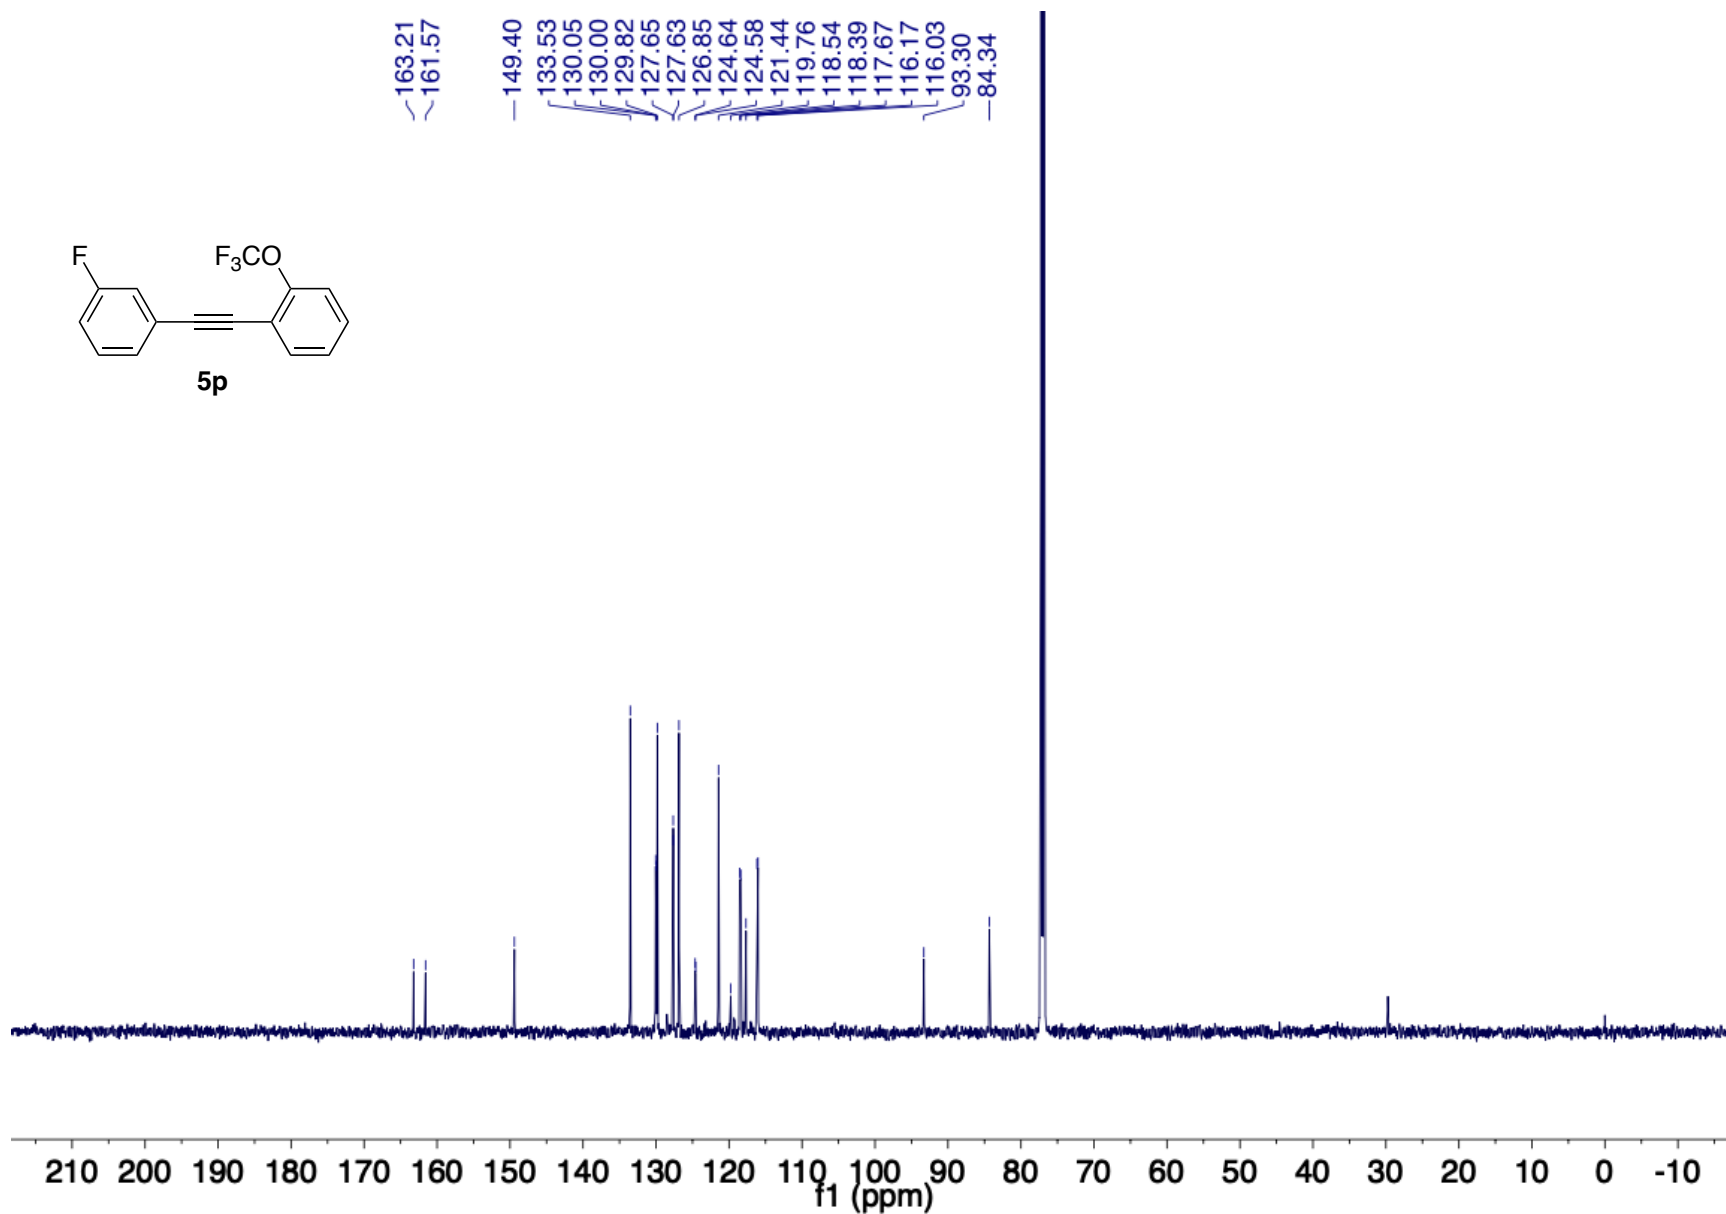

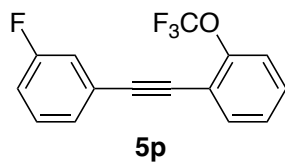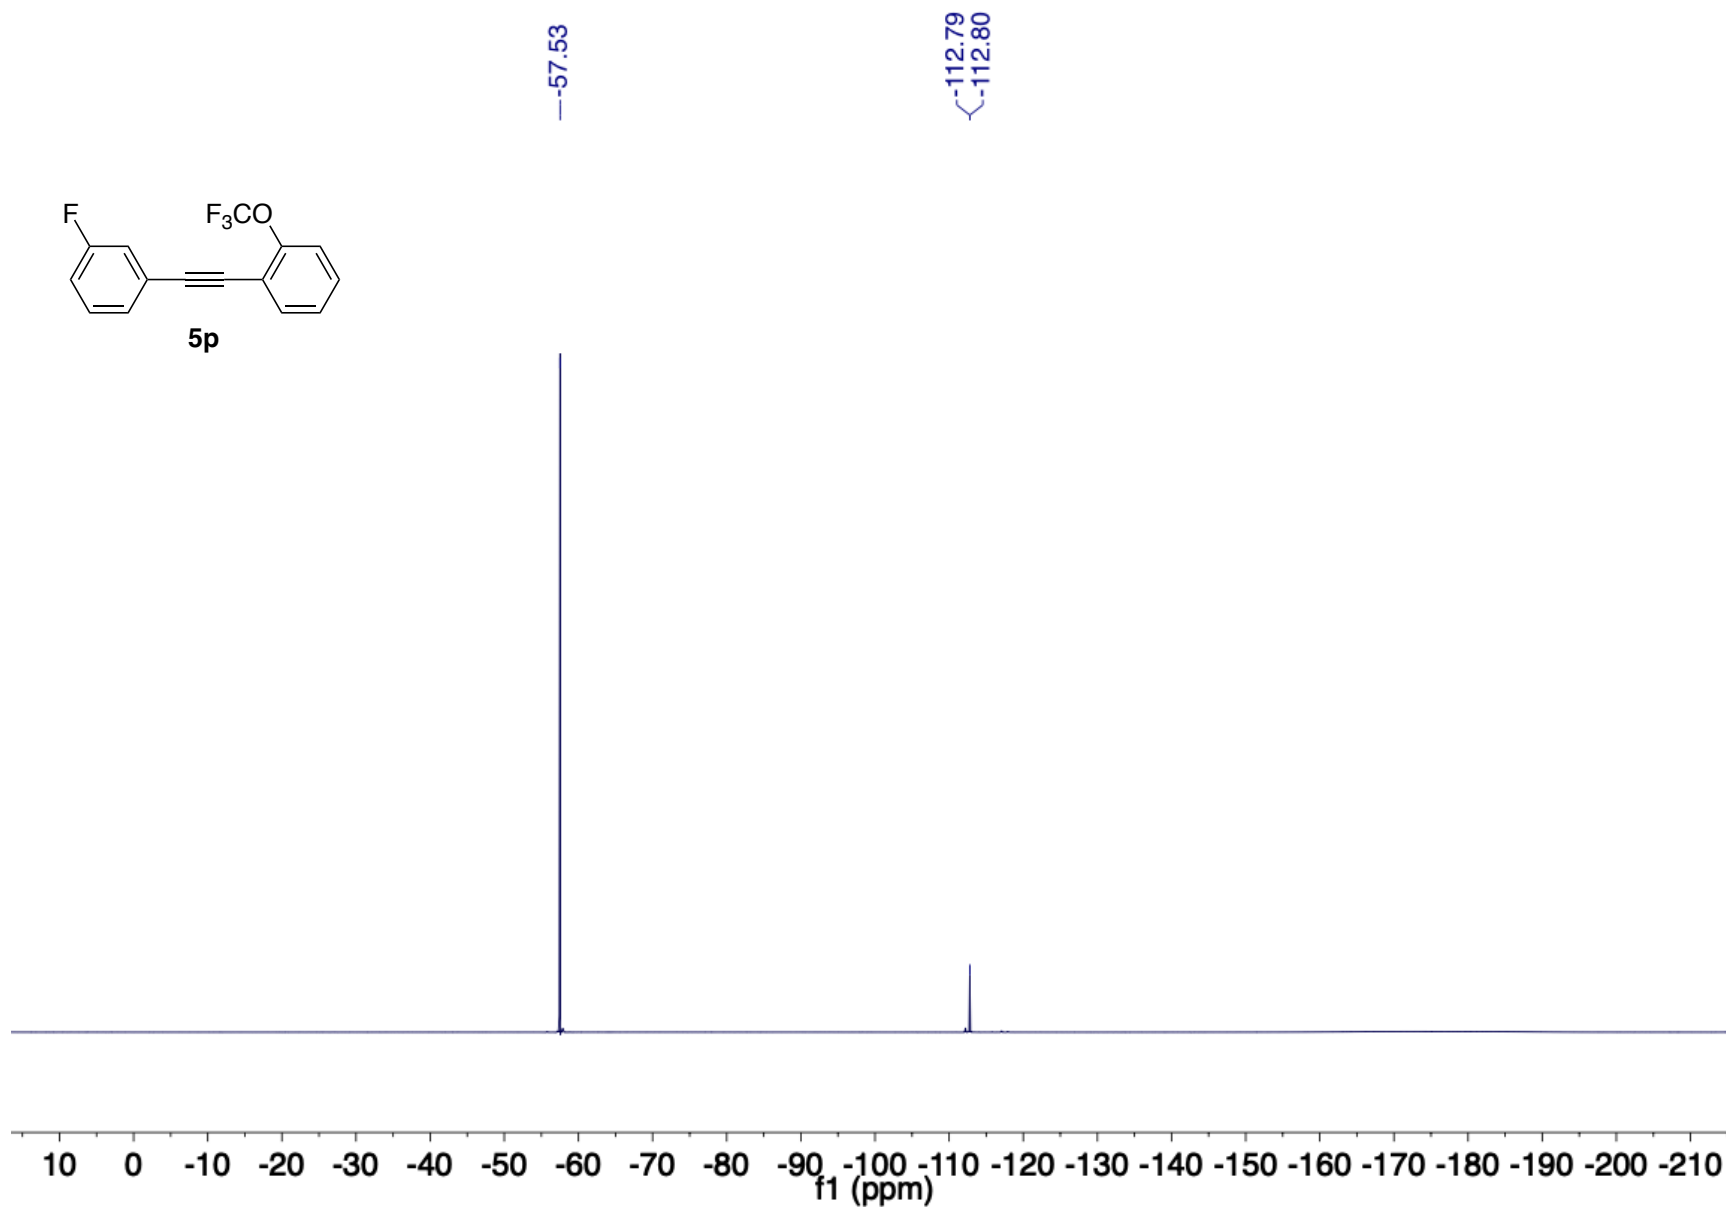

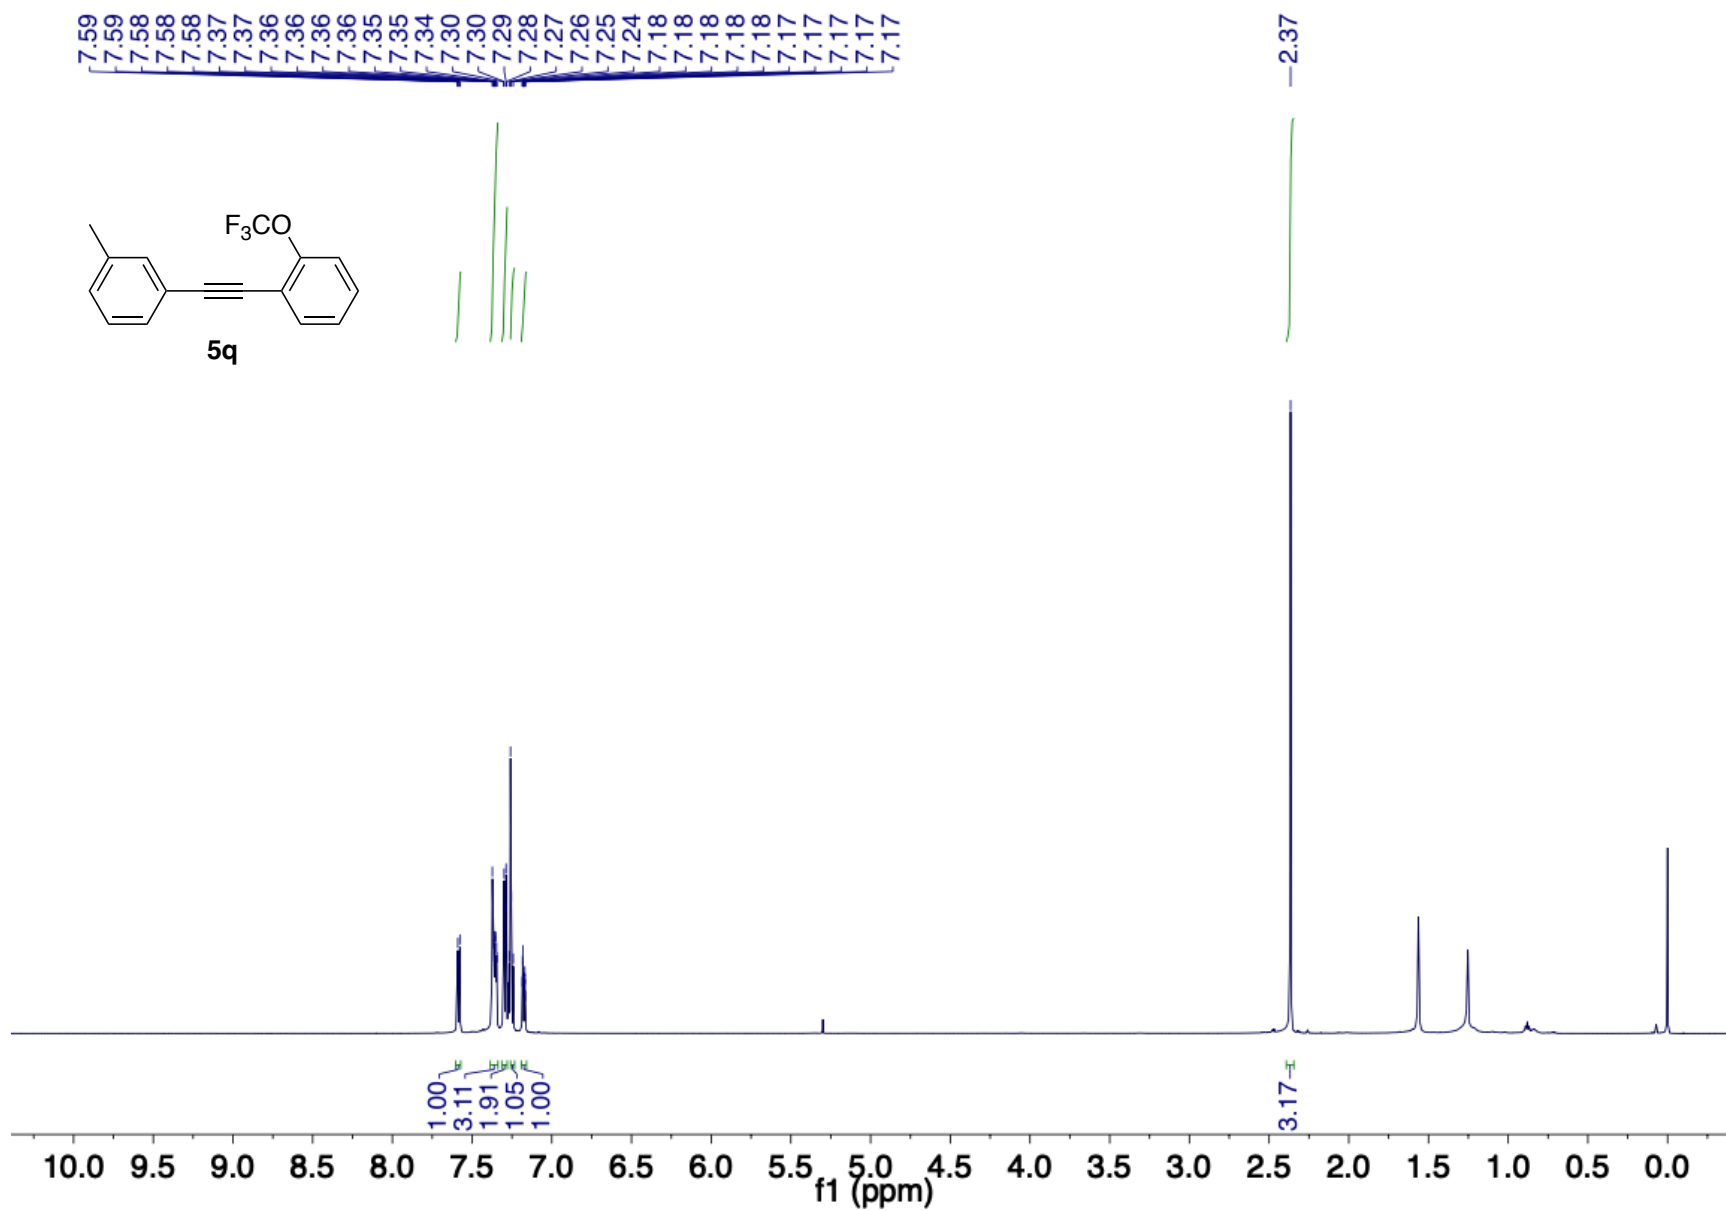

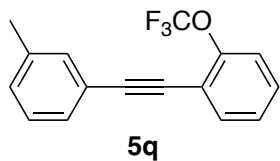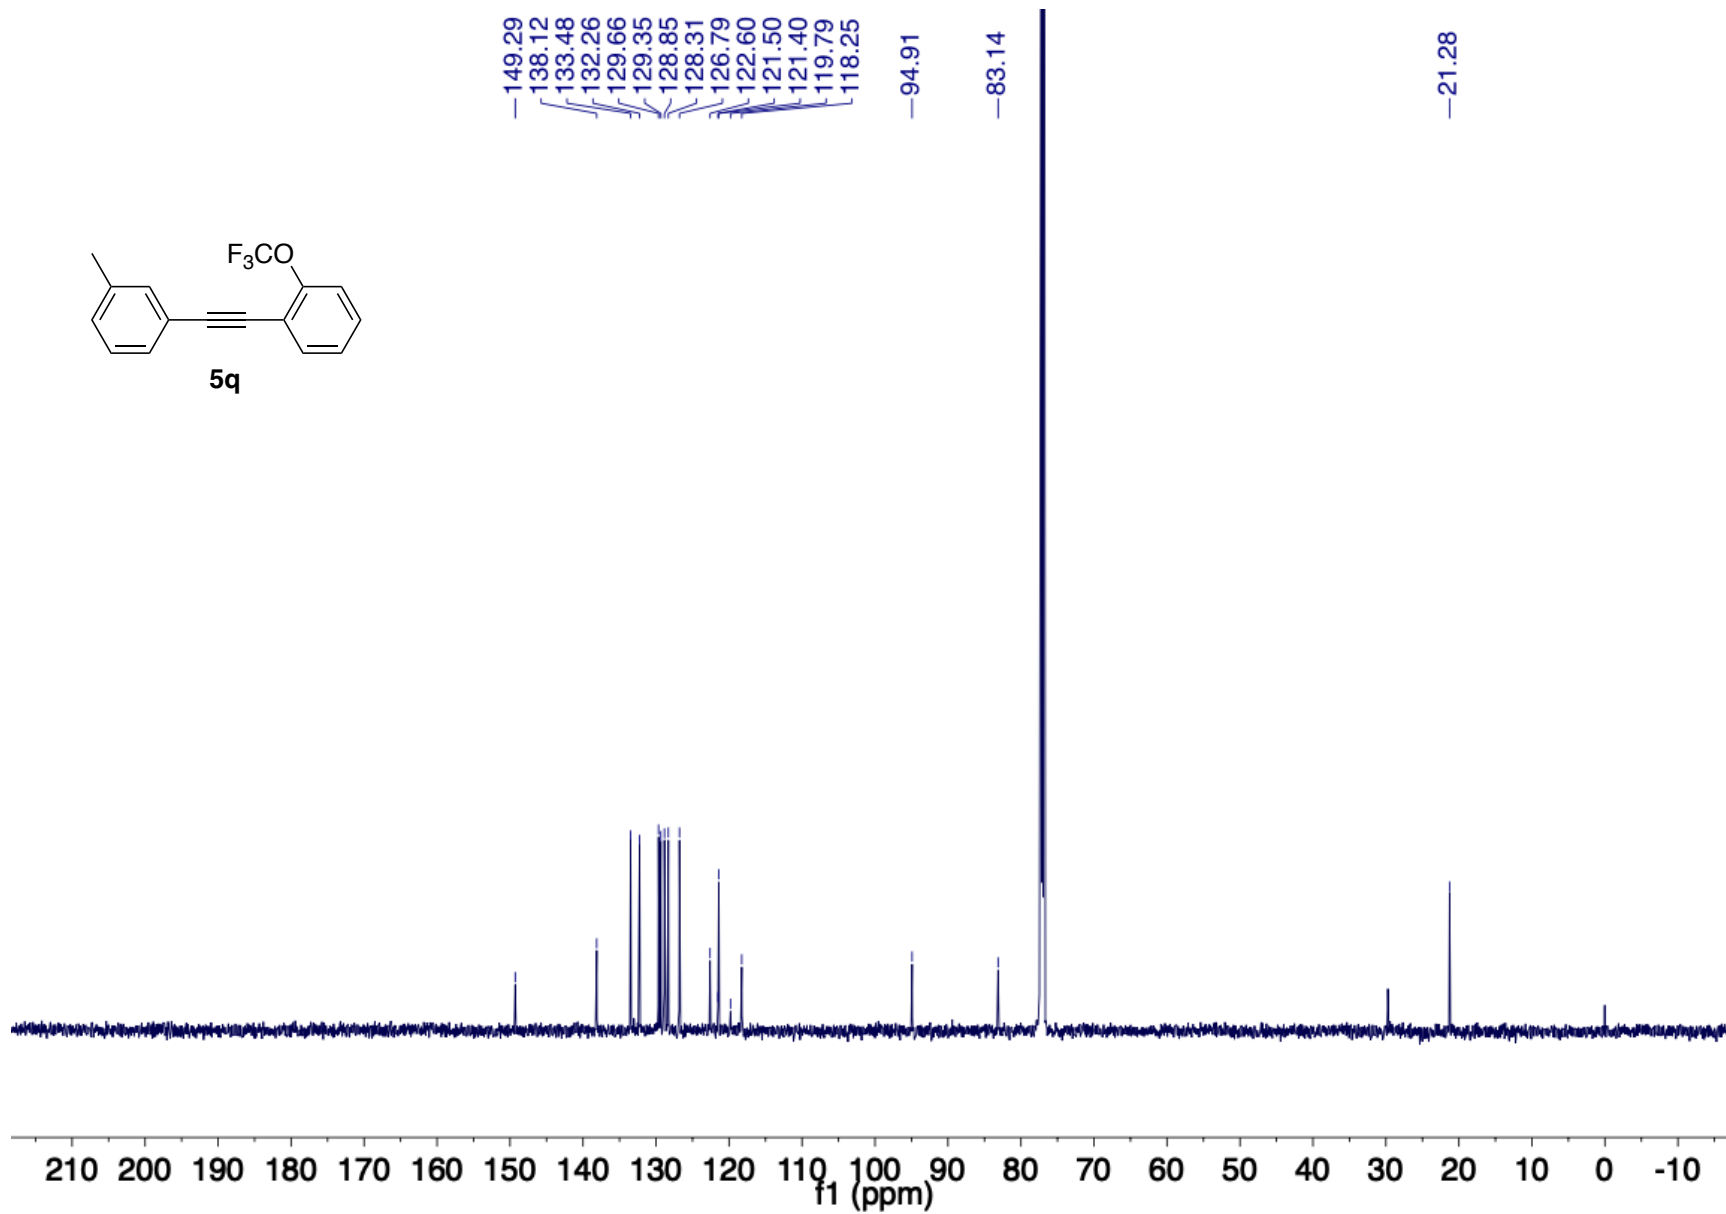

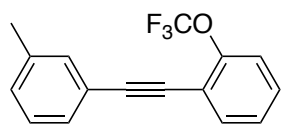

5q

--57.48

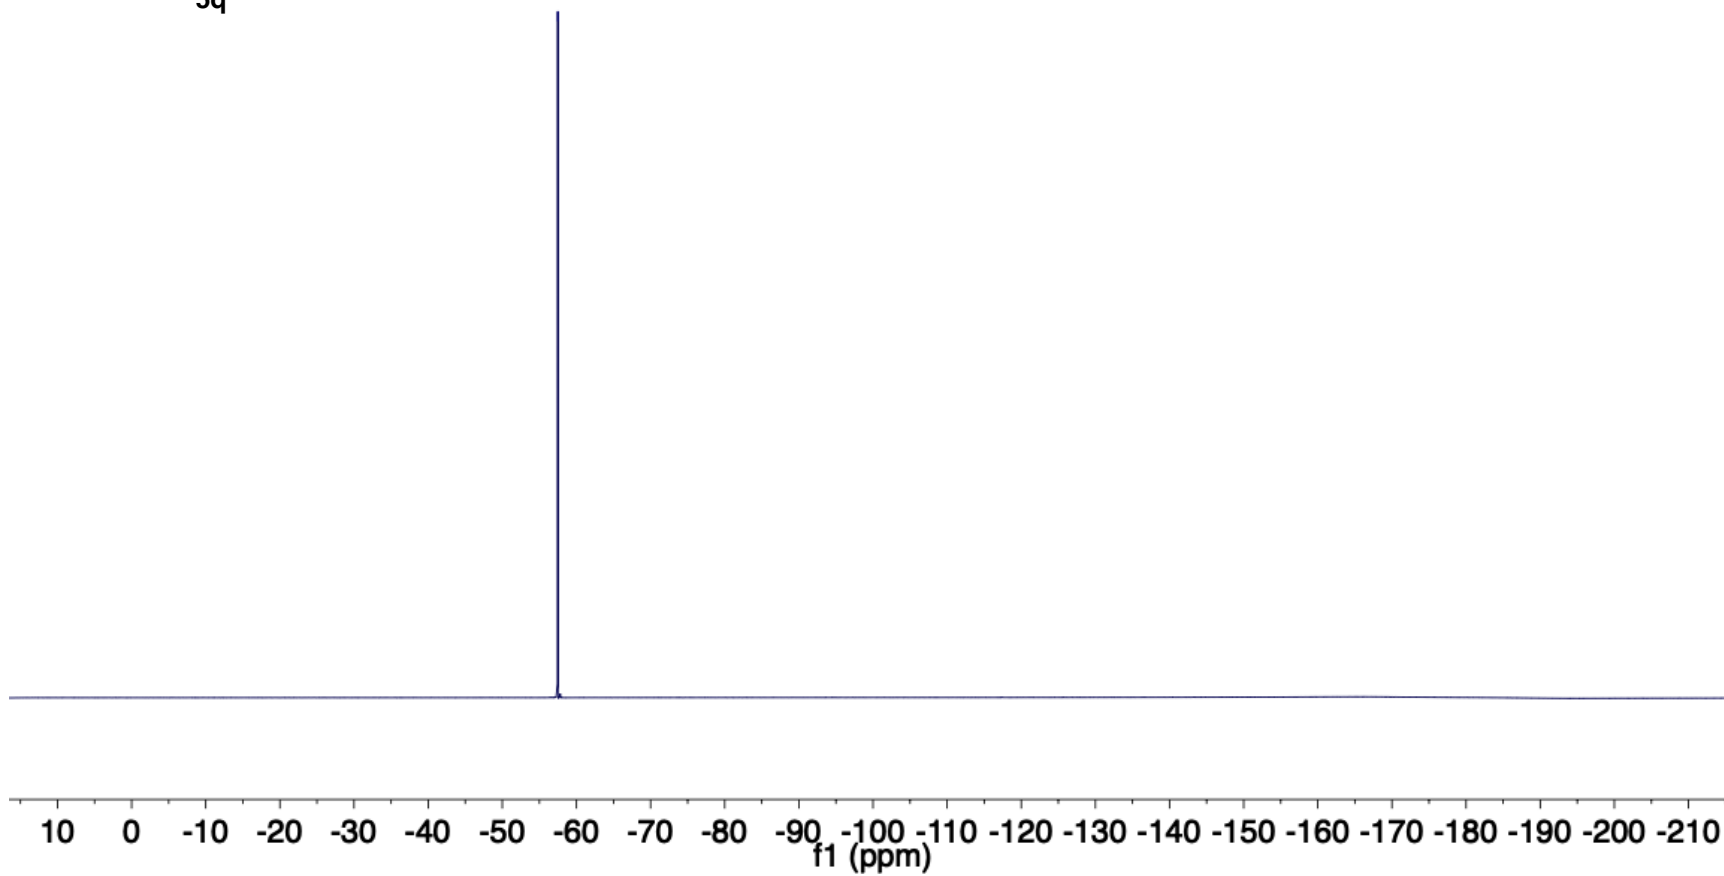





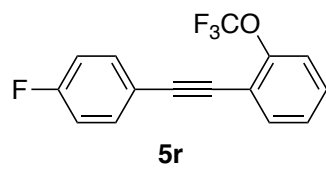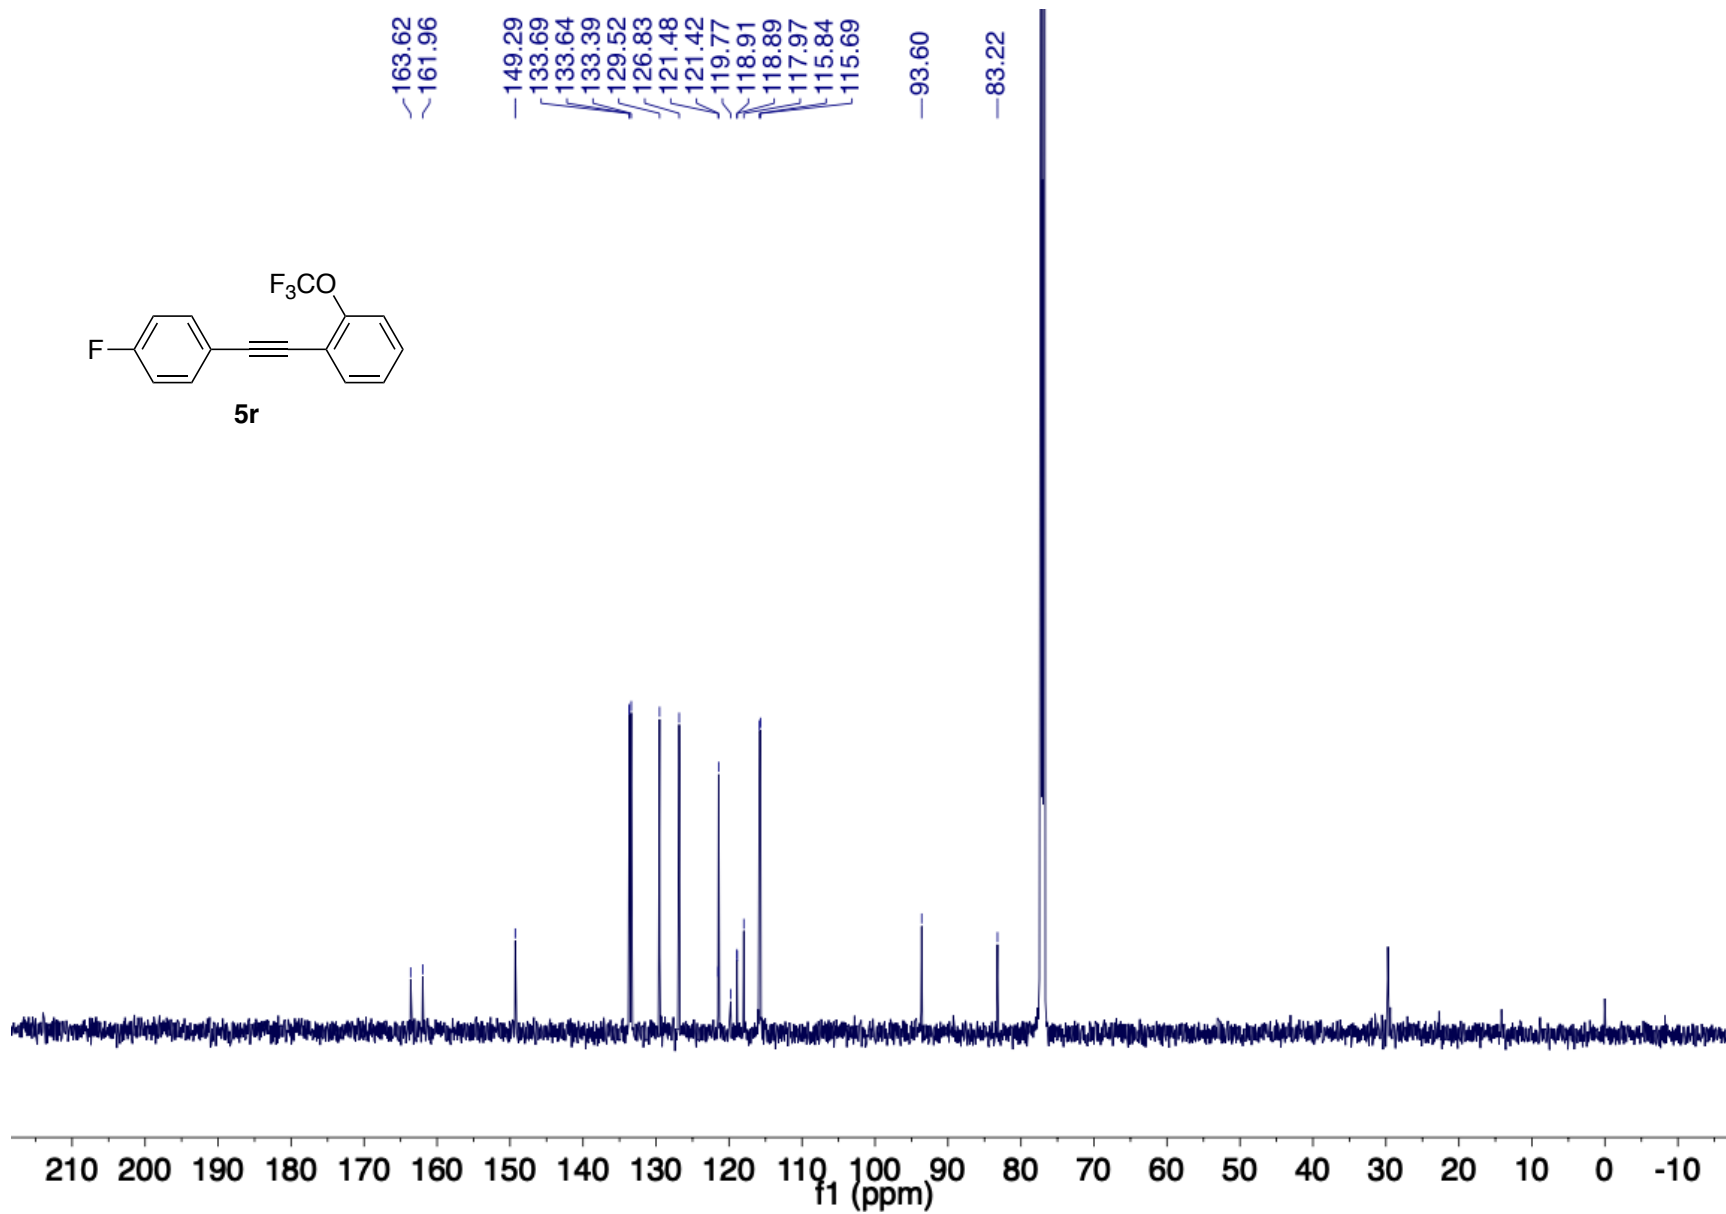

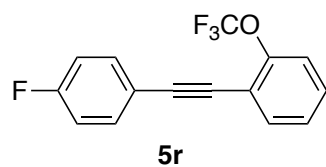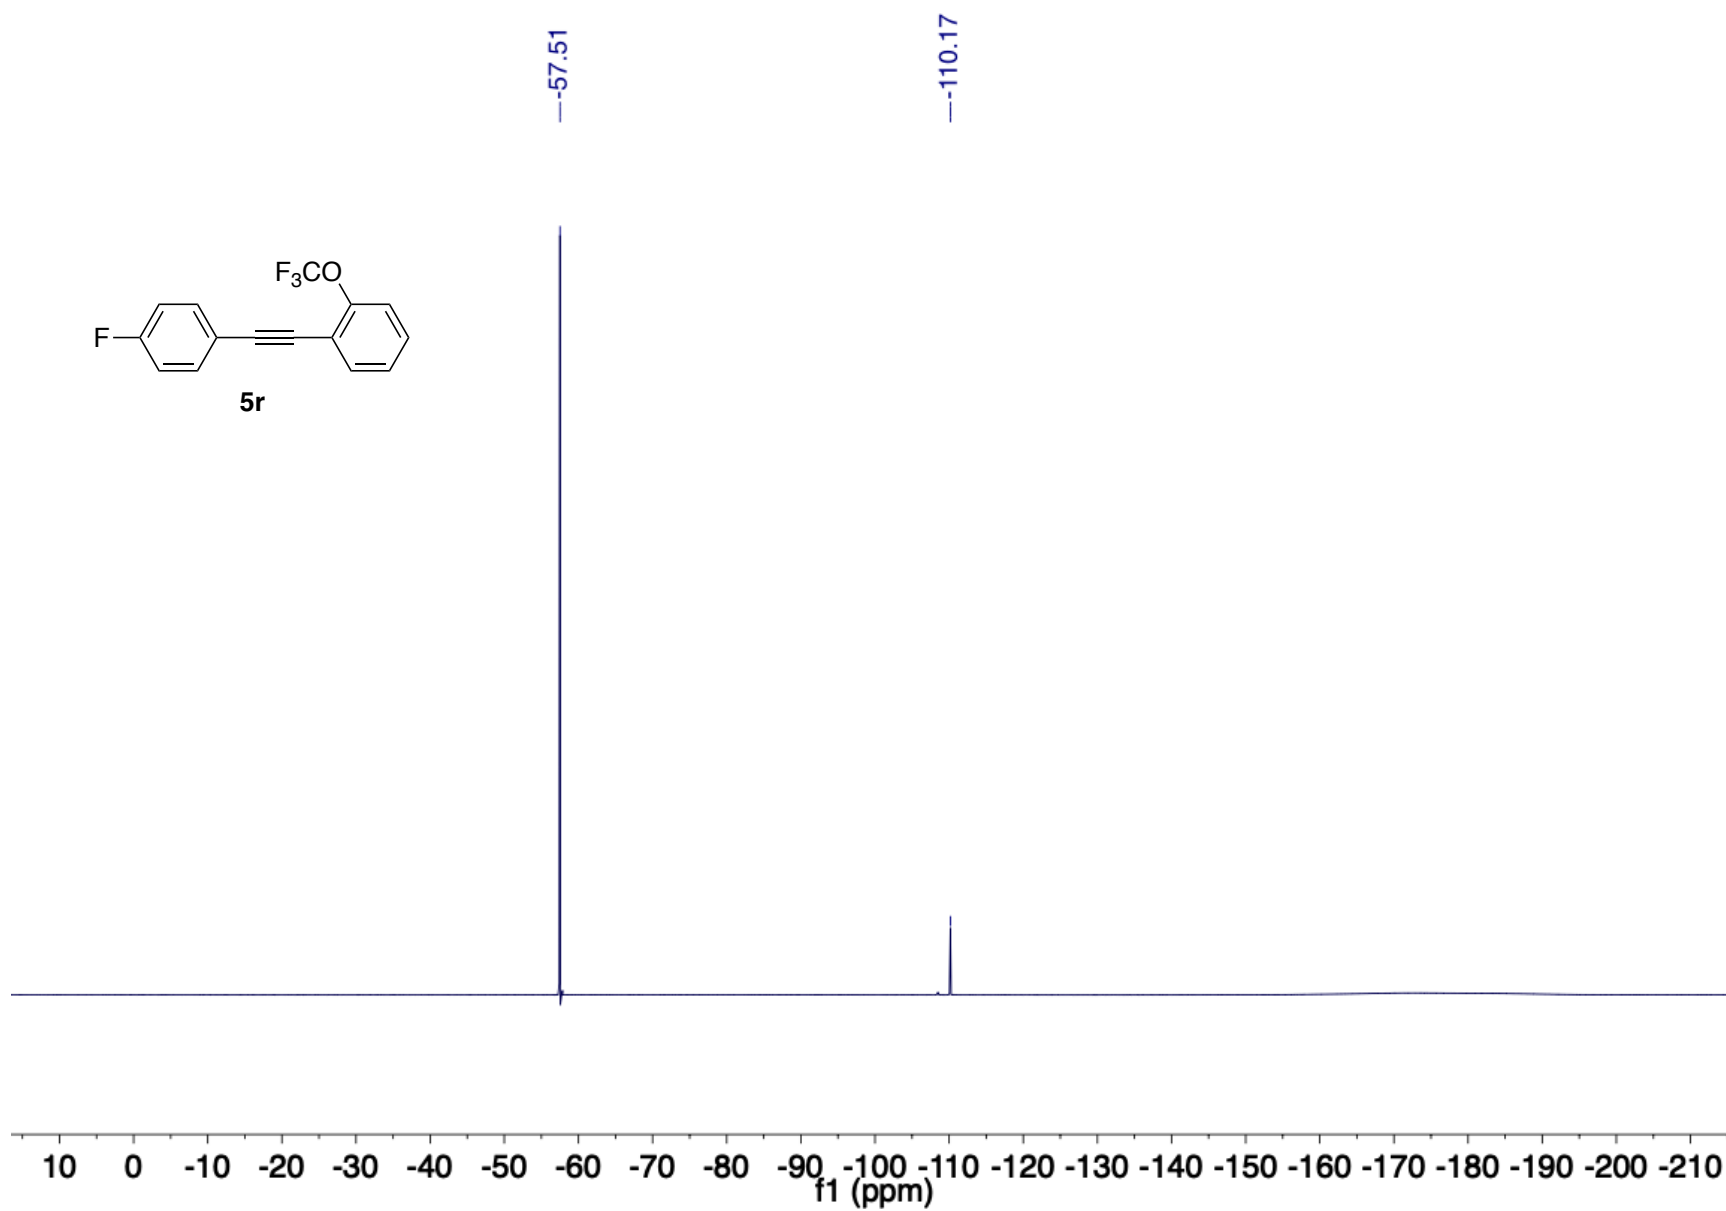

7.59  
7.59  
7.58  
7.57  
7.48  
7.48  
7.48  
7.47  
7.47  
7.46  
7.39  
7.39  
7.38  
7.38  
7.38  
7.37  
7.37  
7.35  
7.35  
7.34  
7.34  
7.33  
7.33  
7.31  
7.31  
7.30  
7.30  
7.30  
7.29  
7.29  
7.28  
7.28

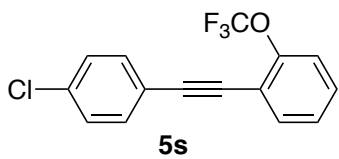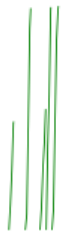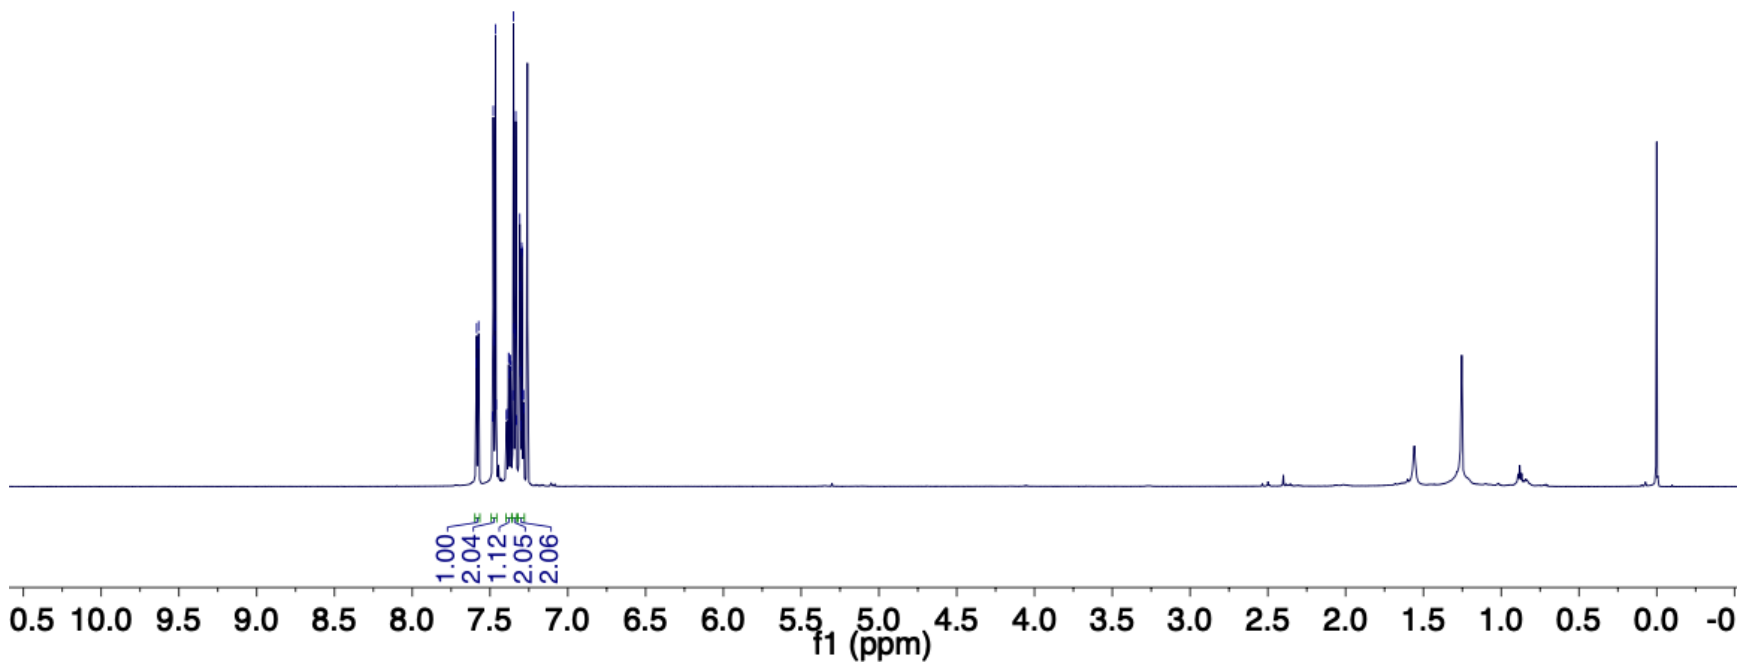

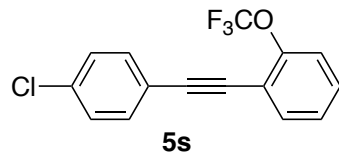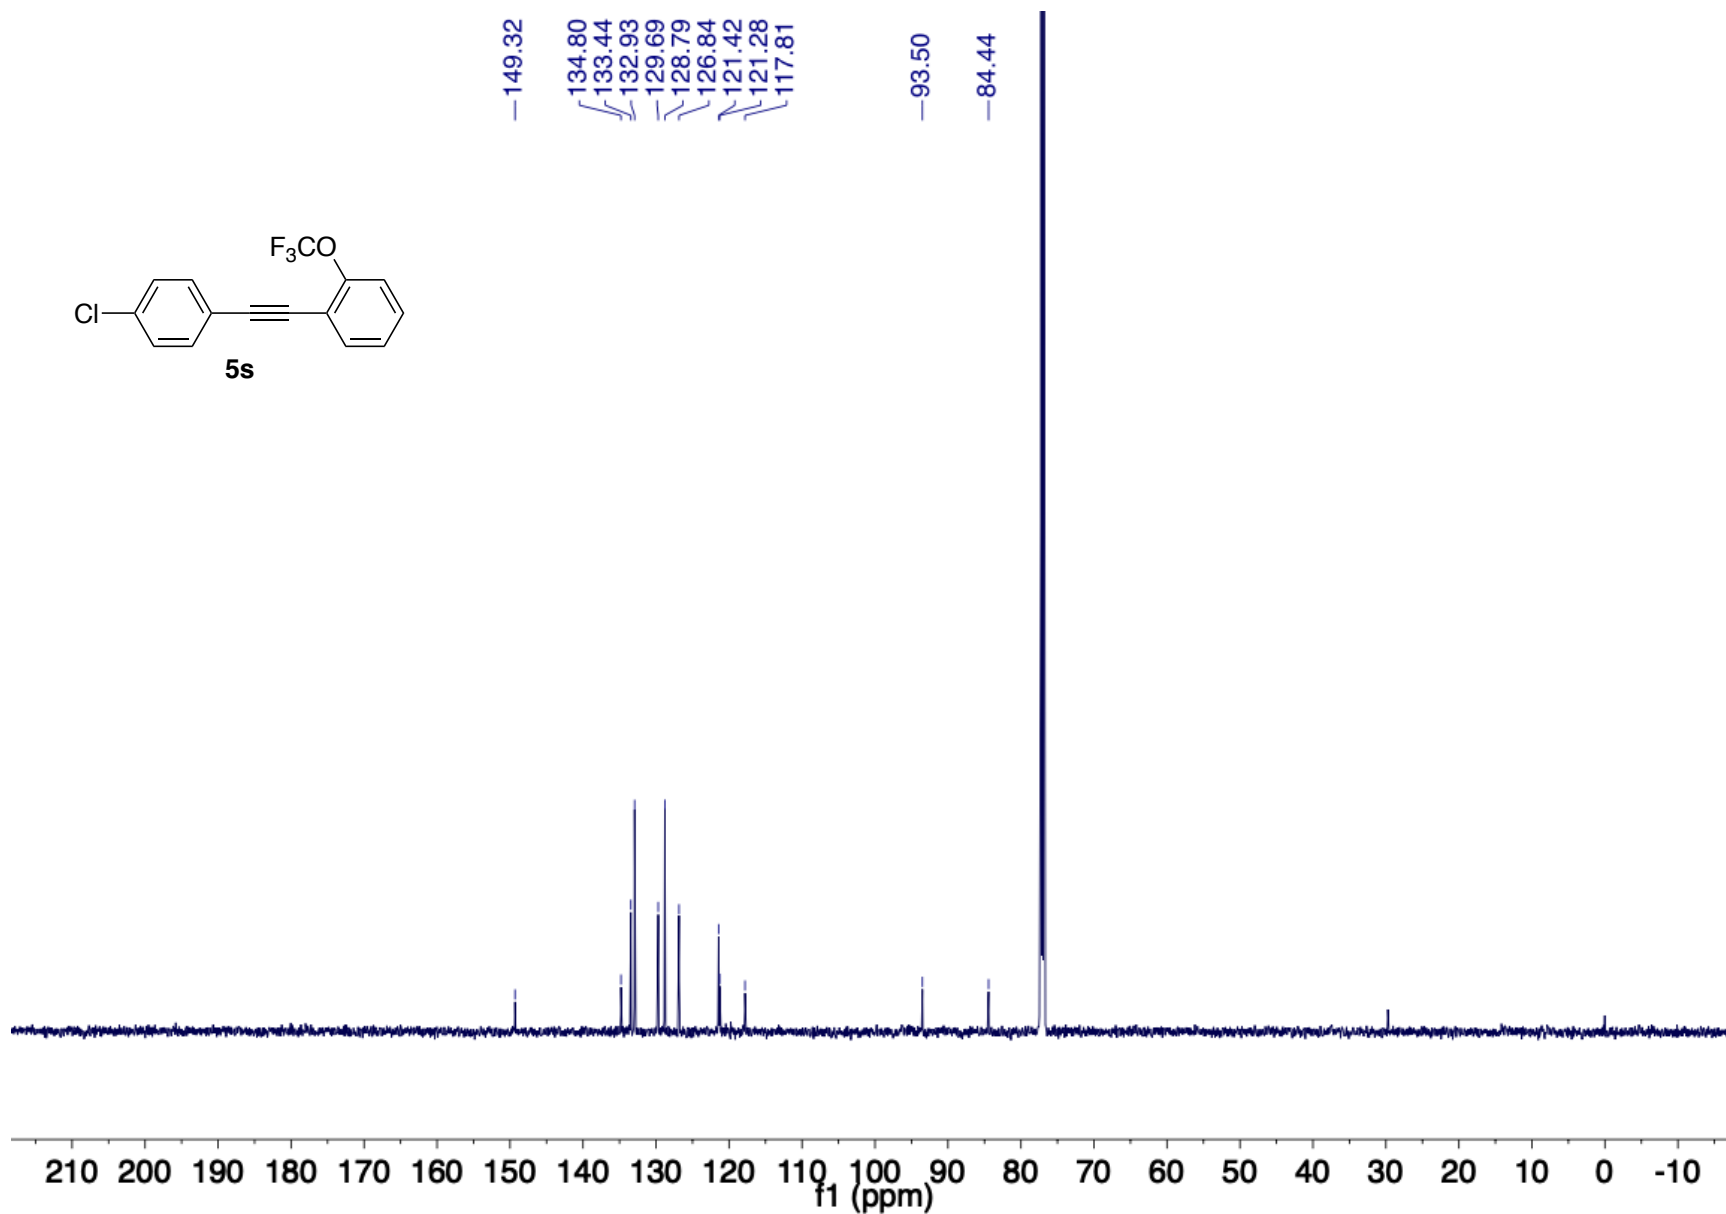

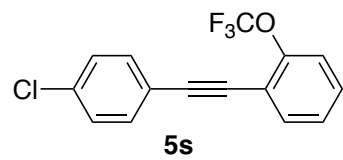

--57.51

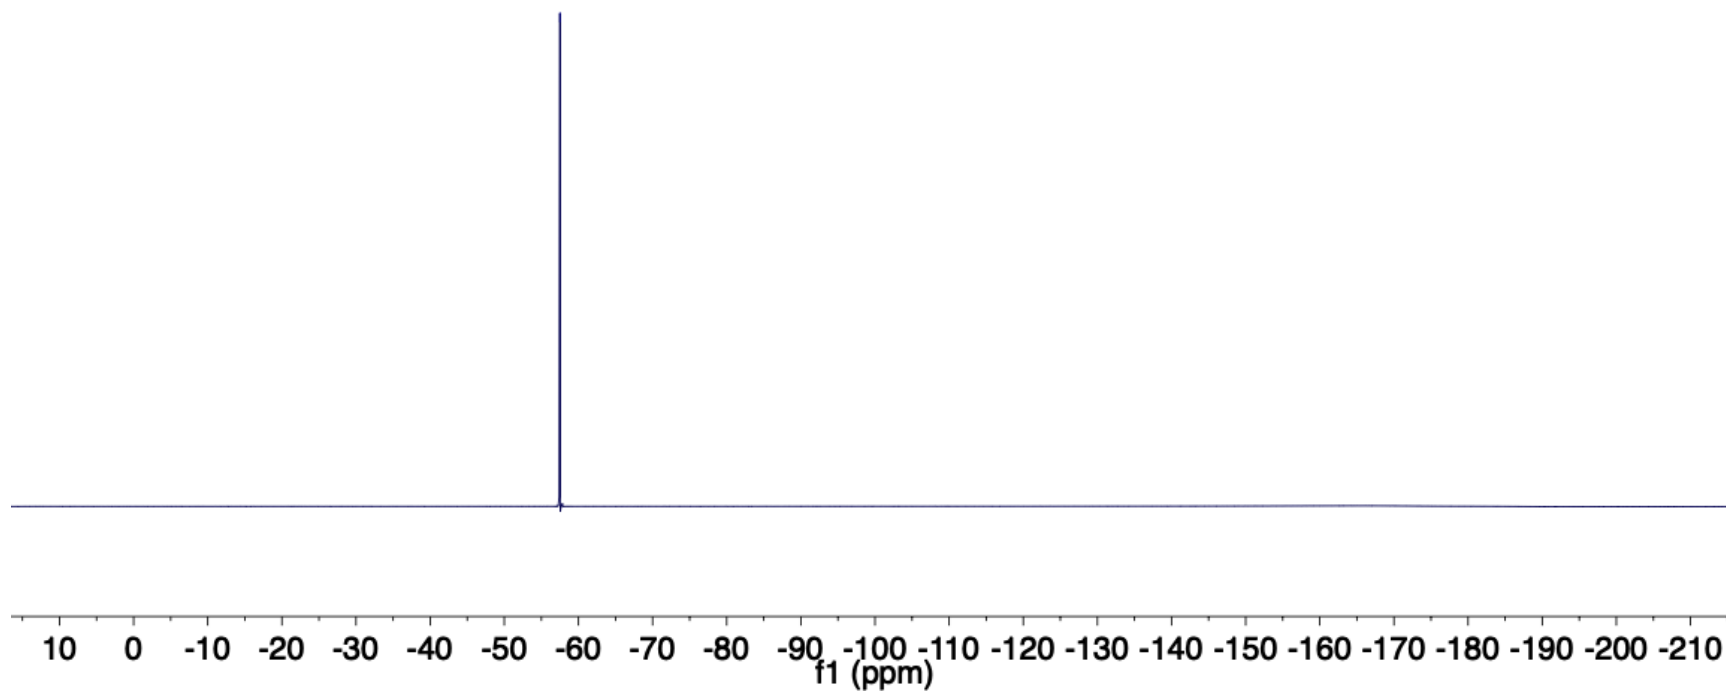

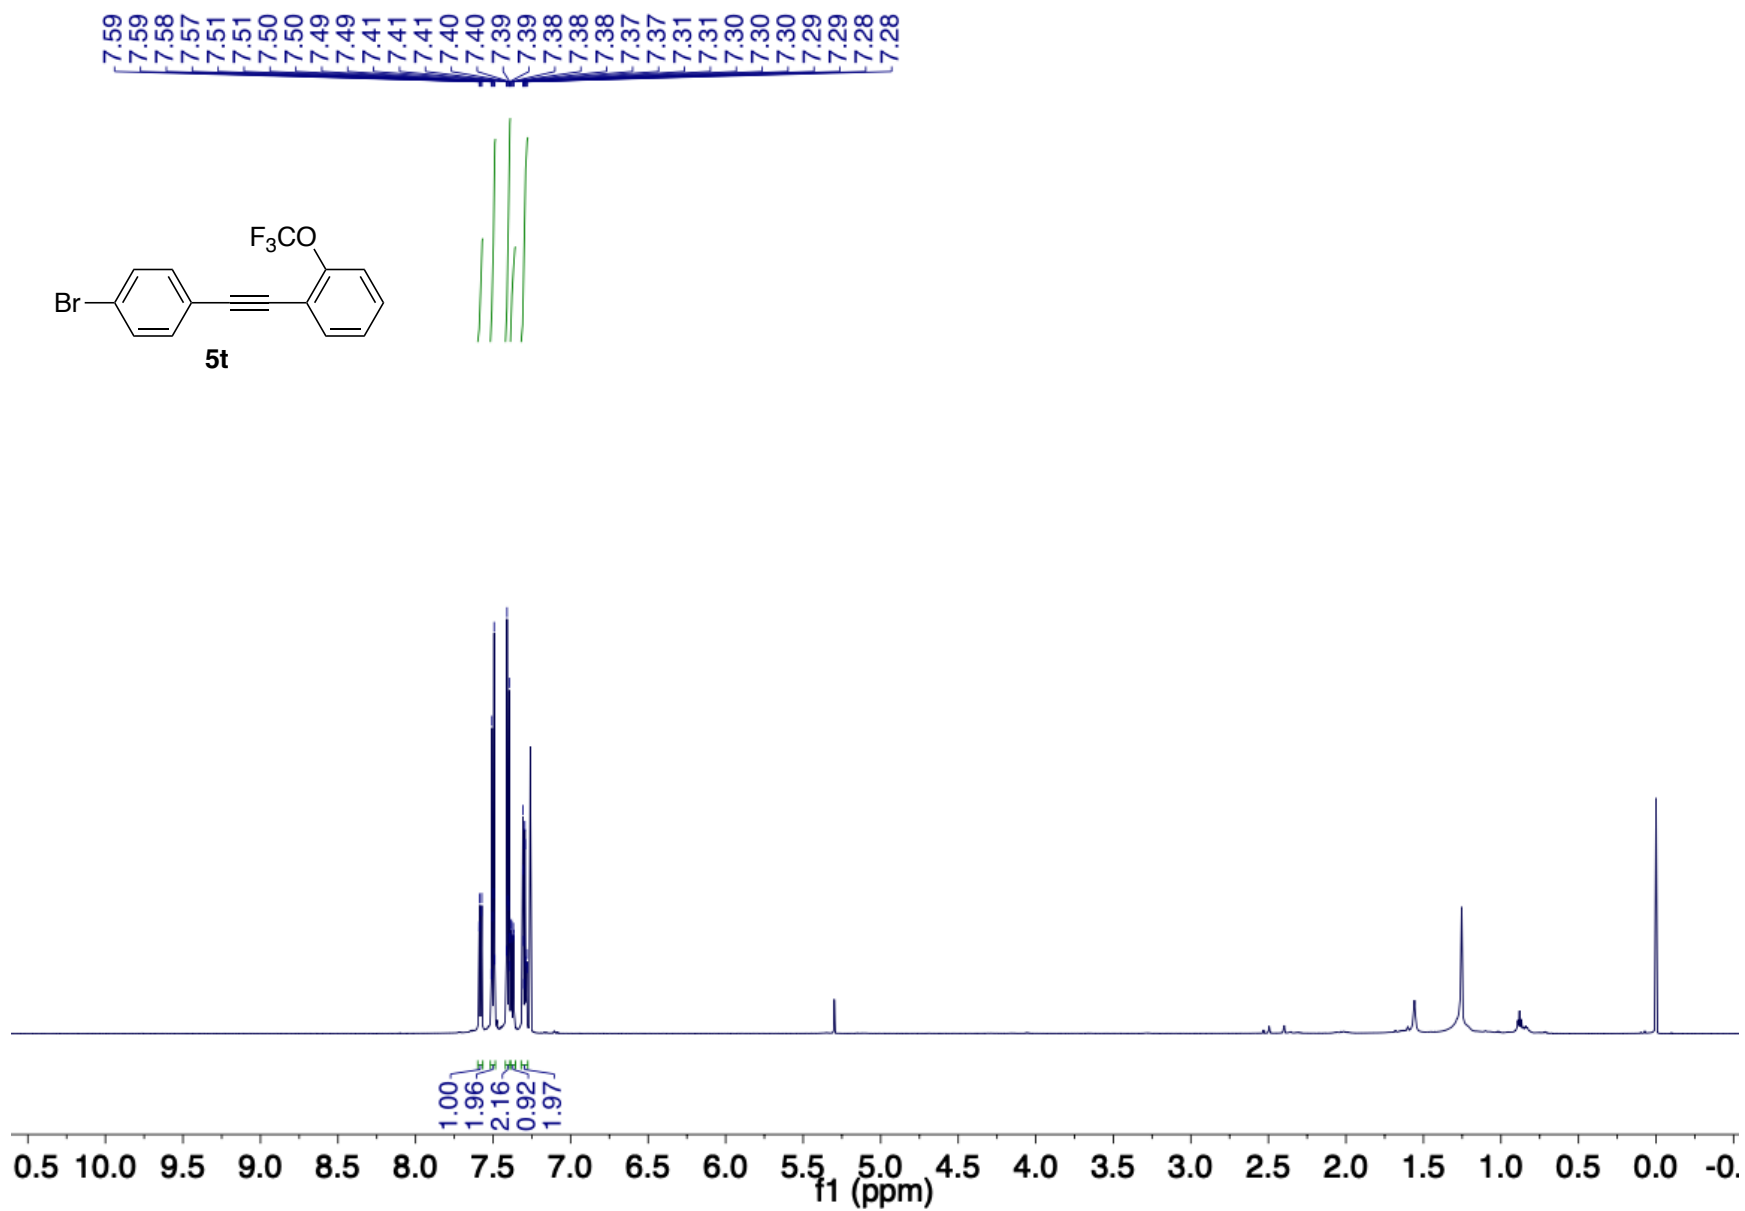

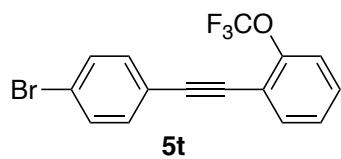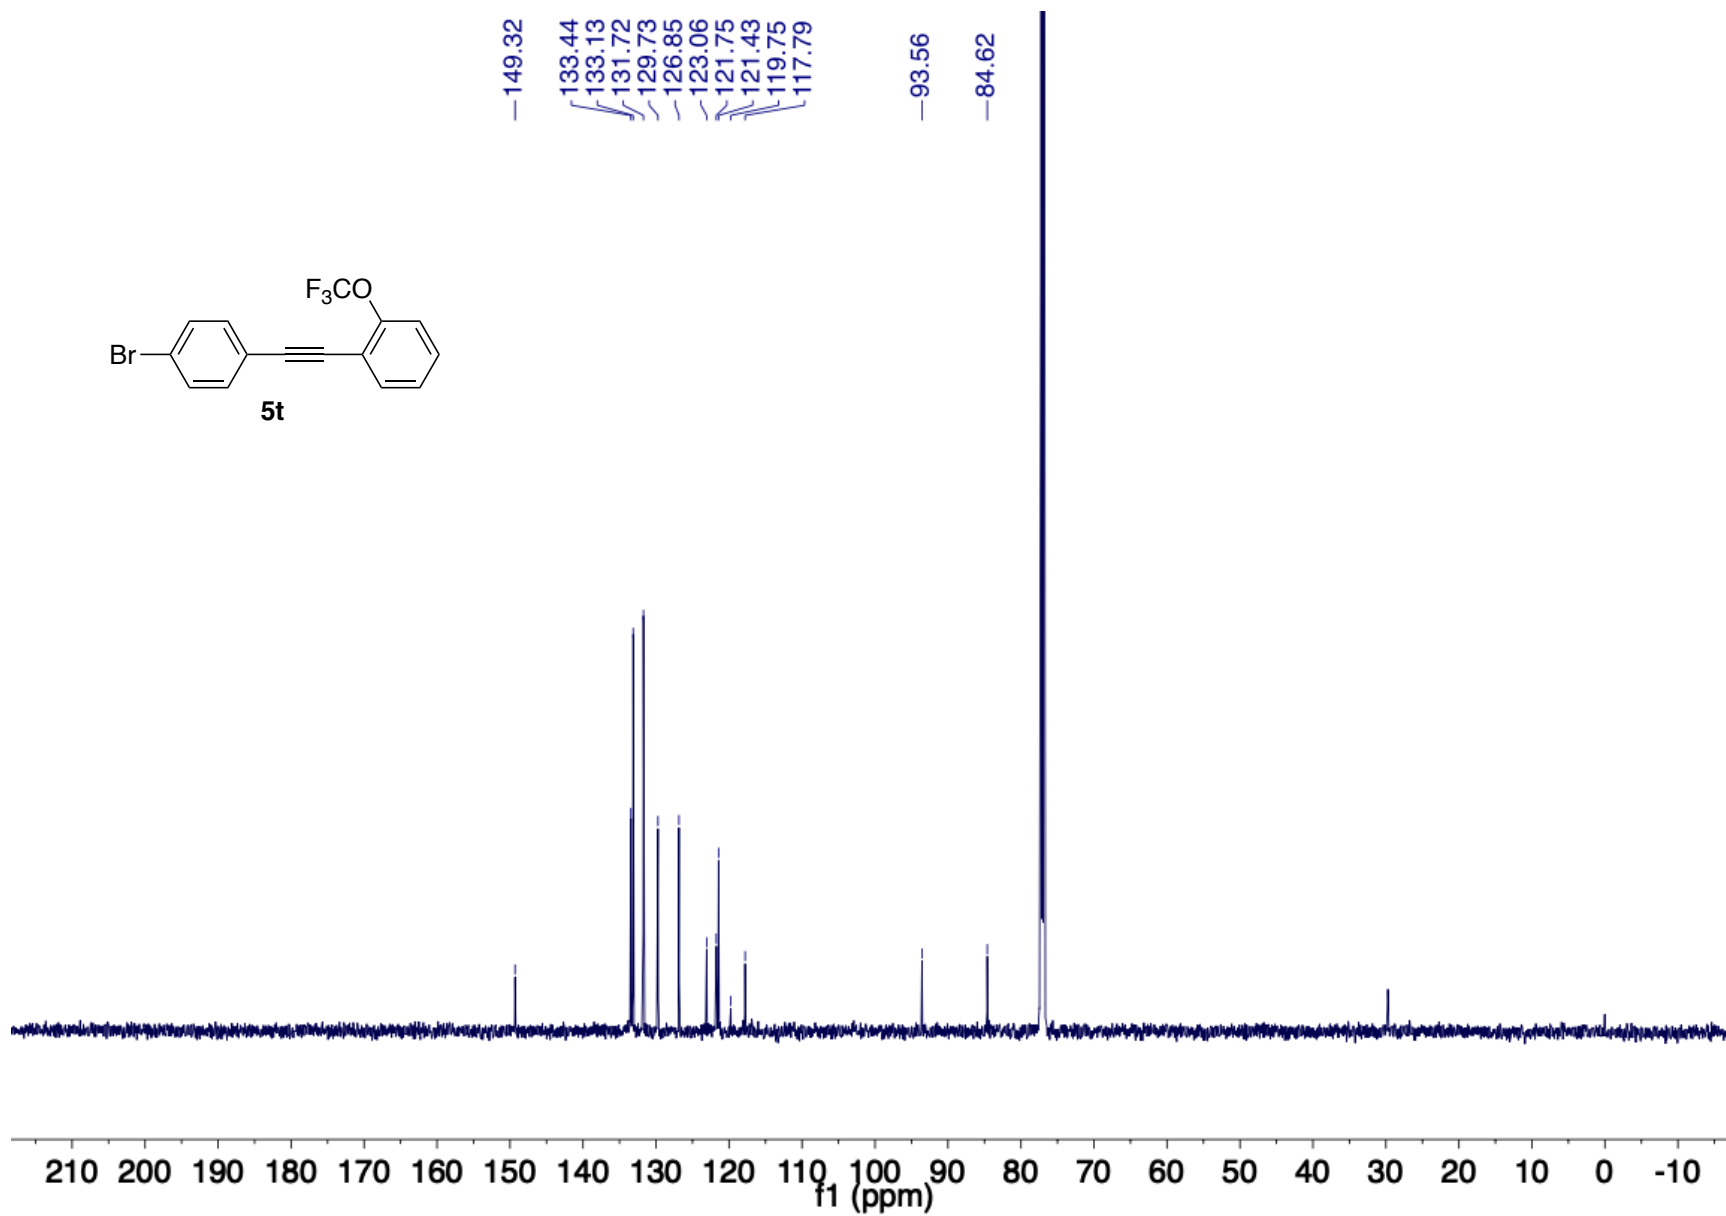

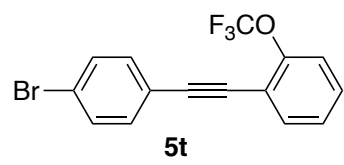

—57.50

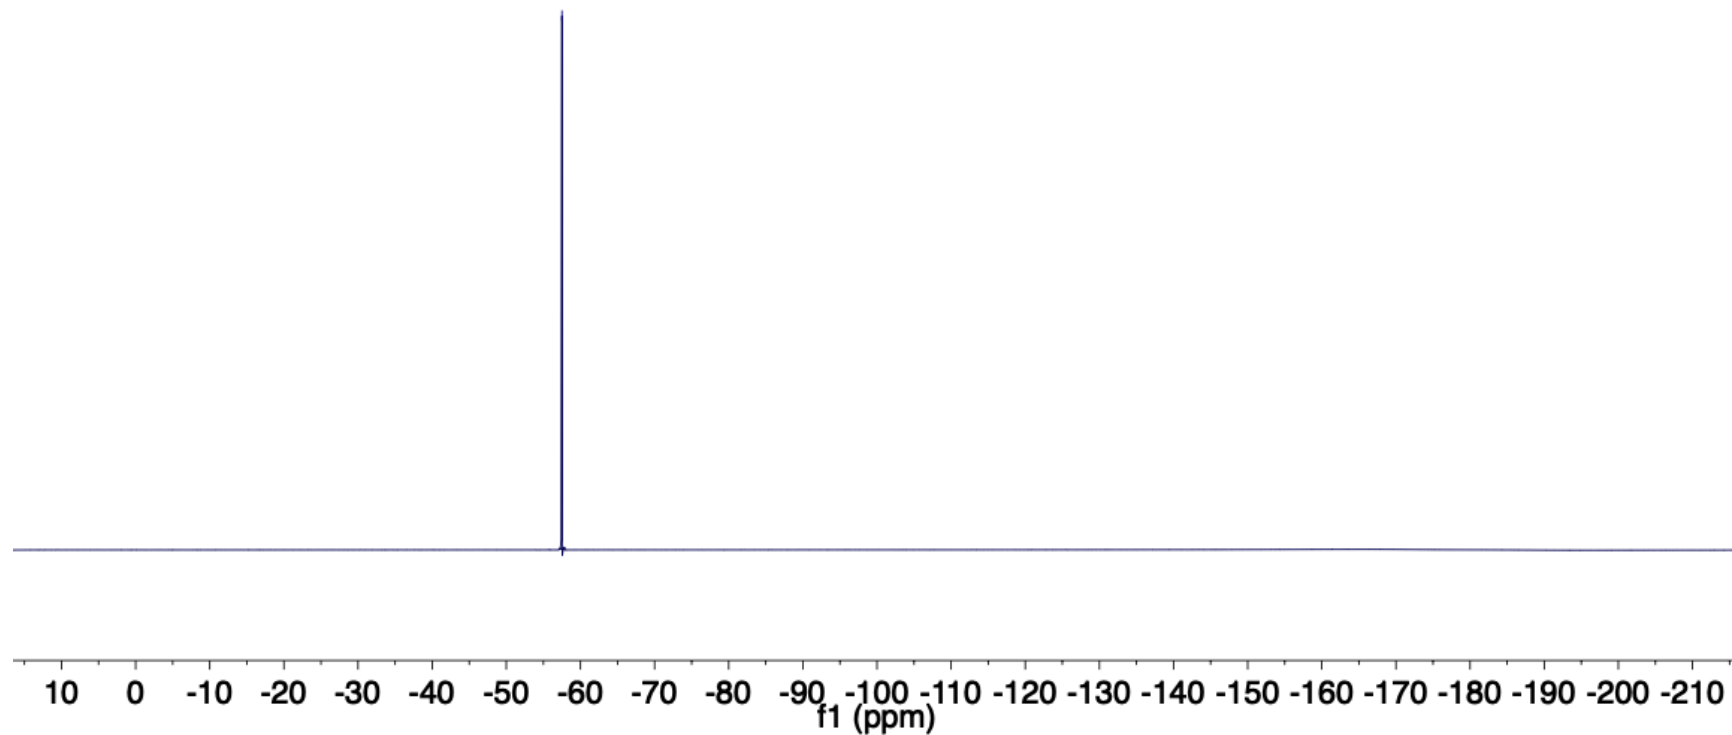



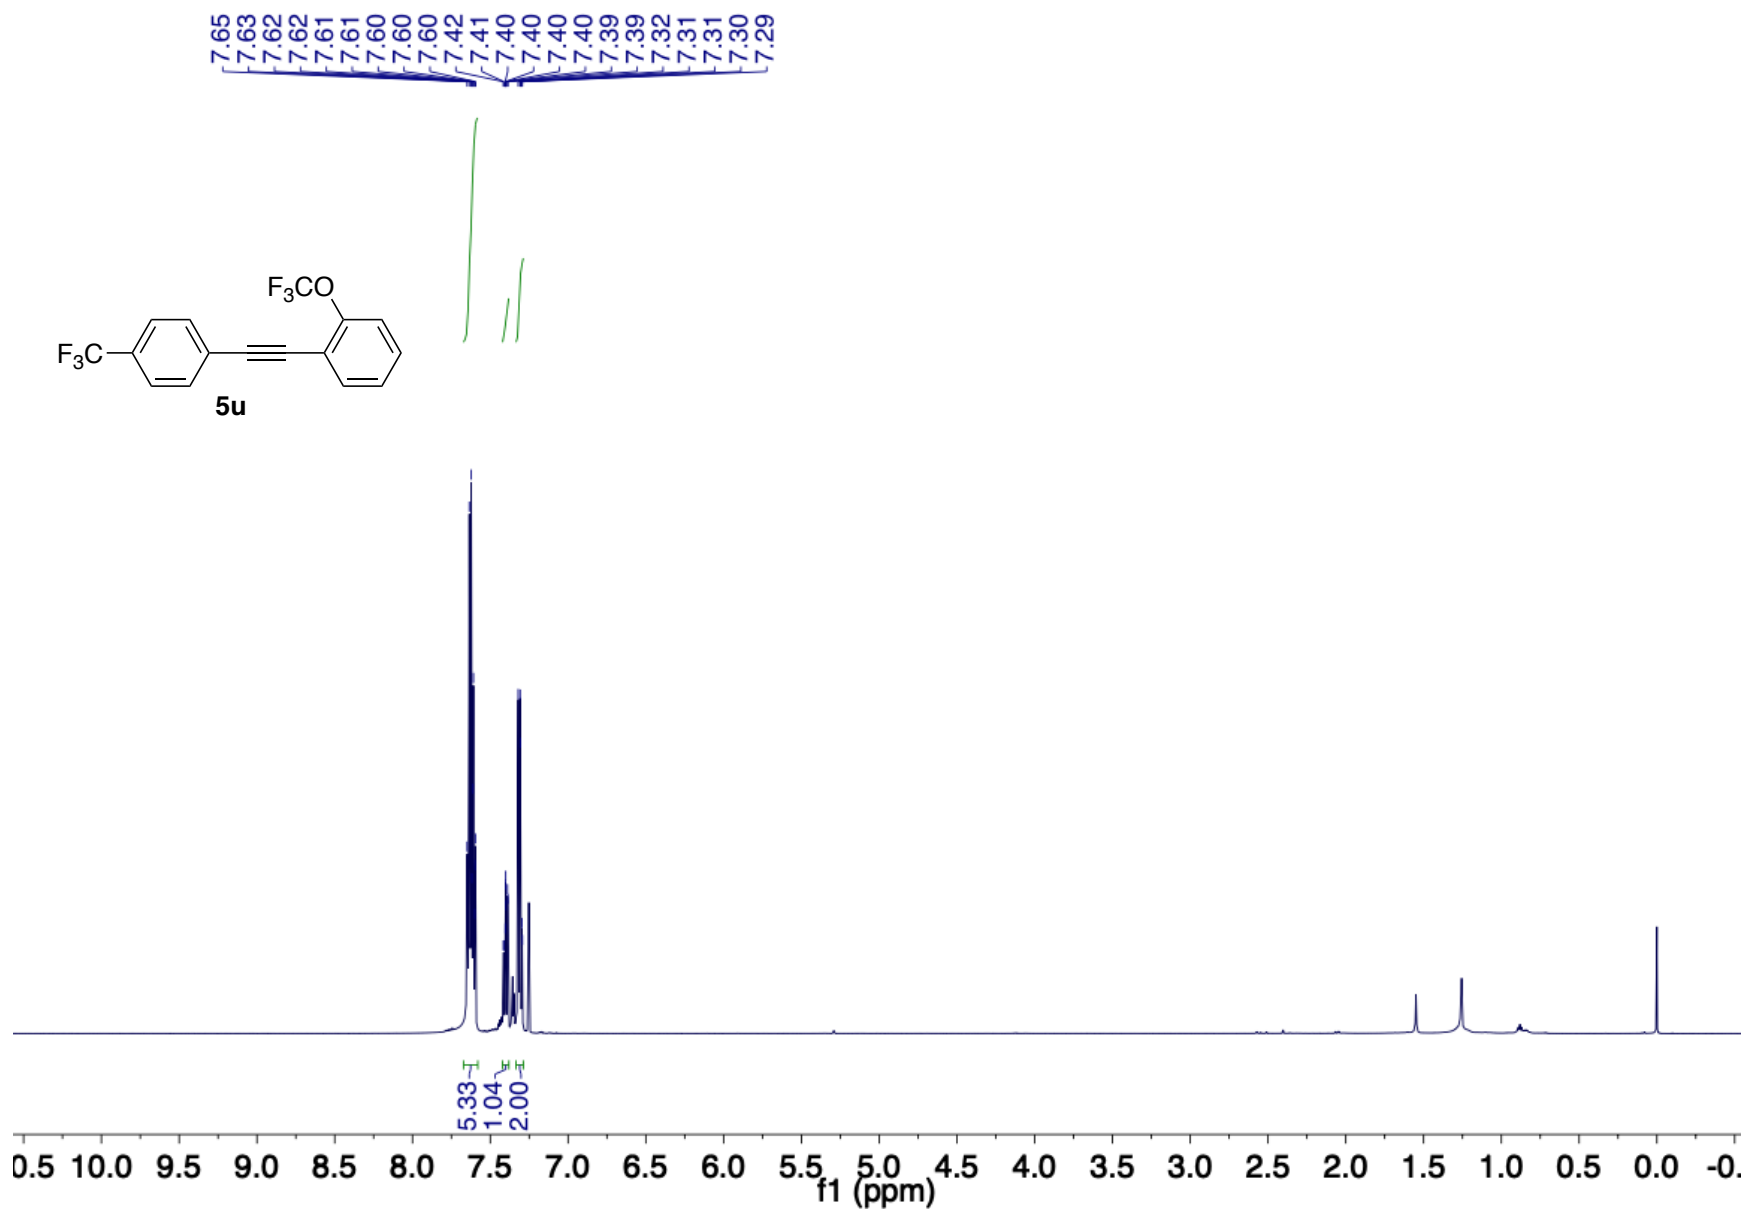

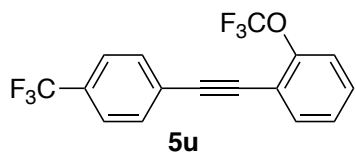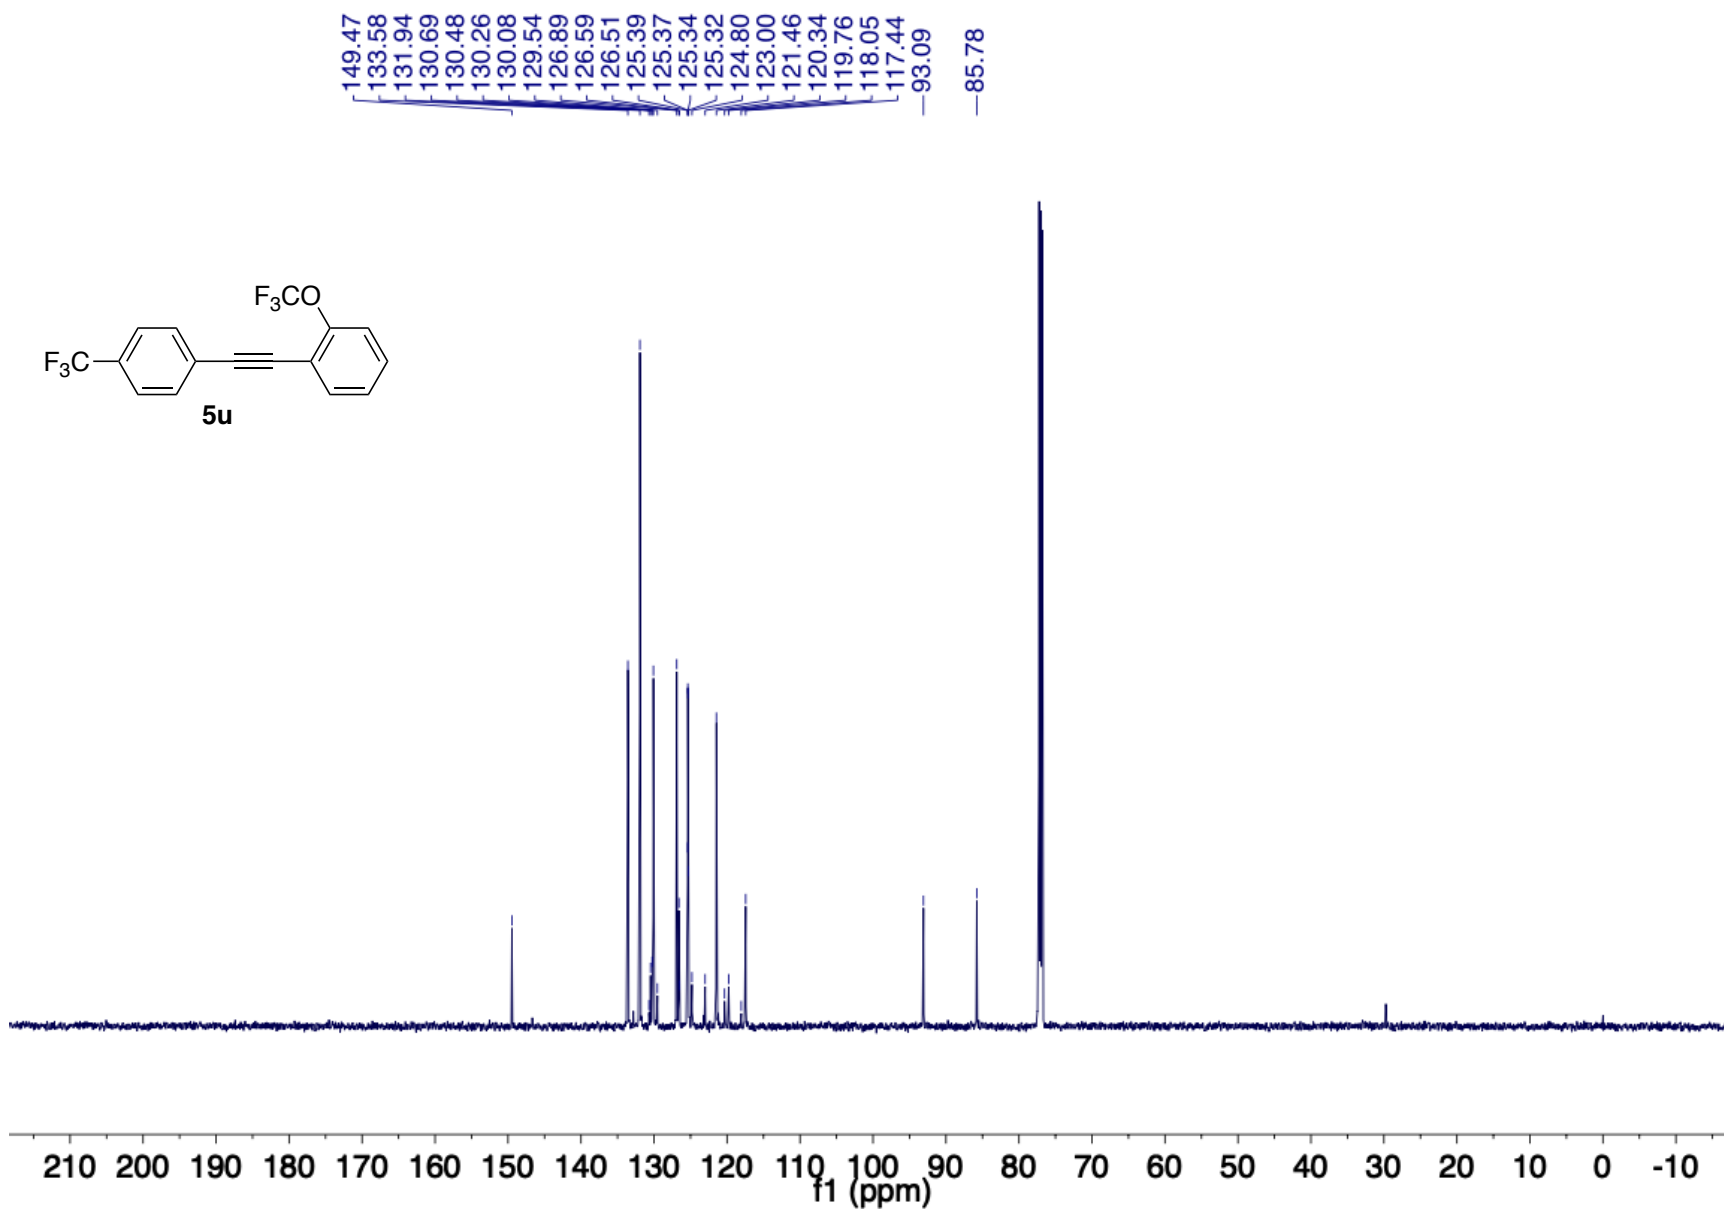

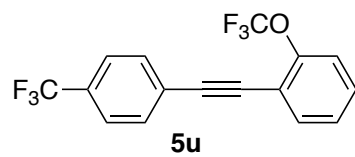

---57.55  
---62.86

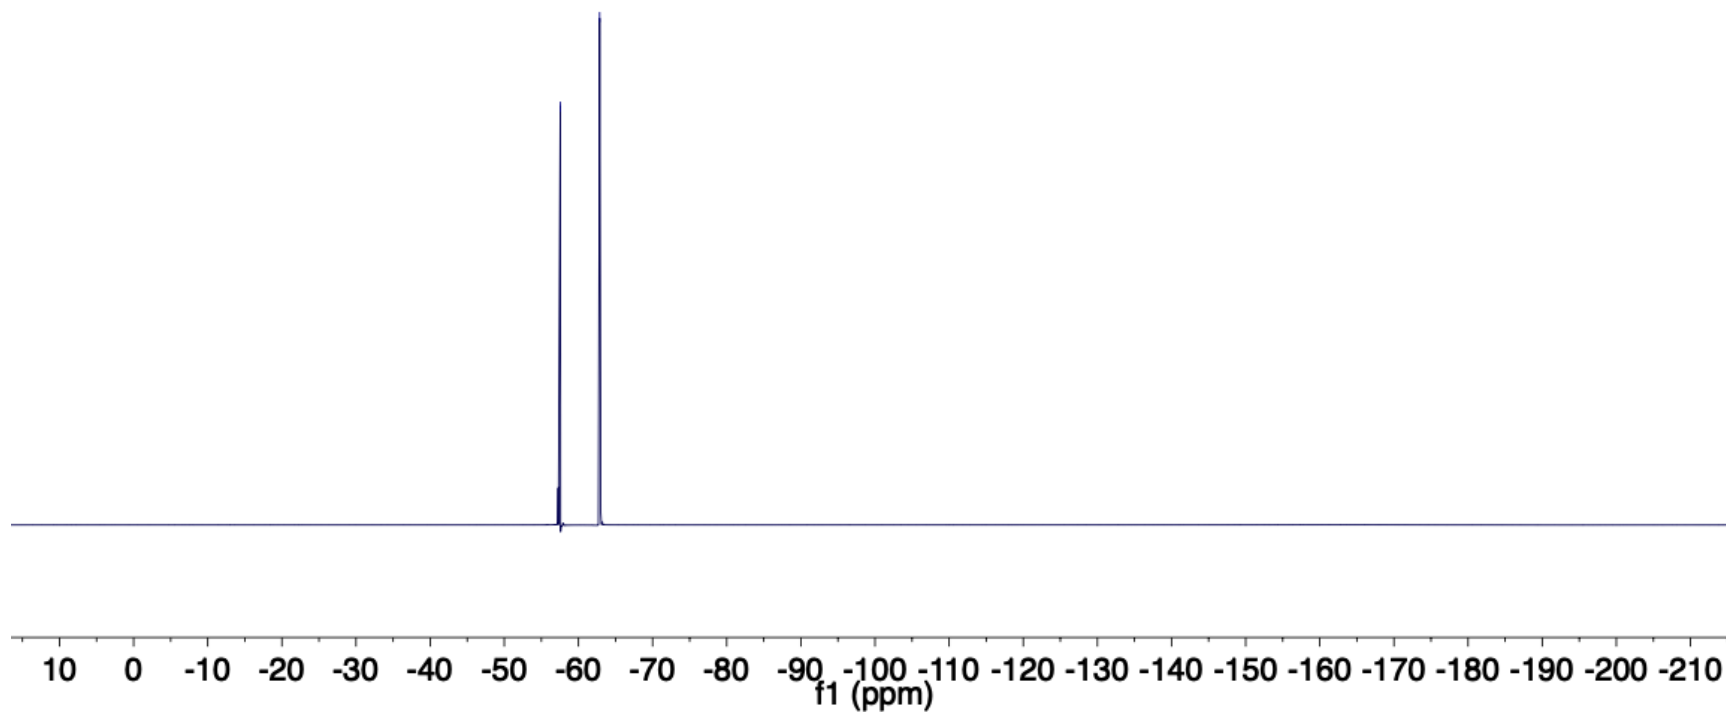

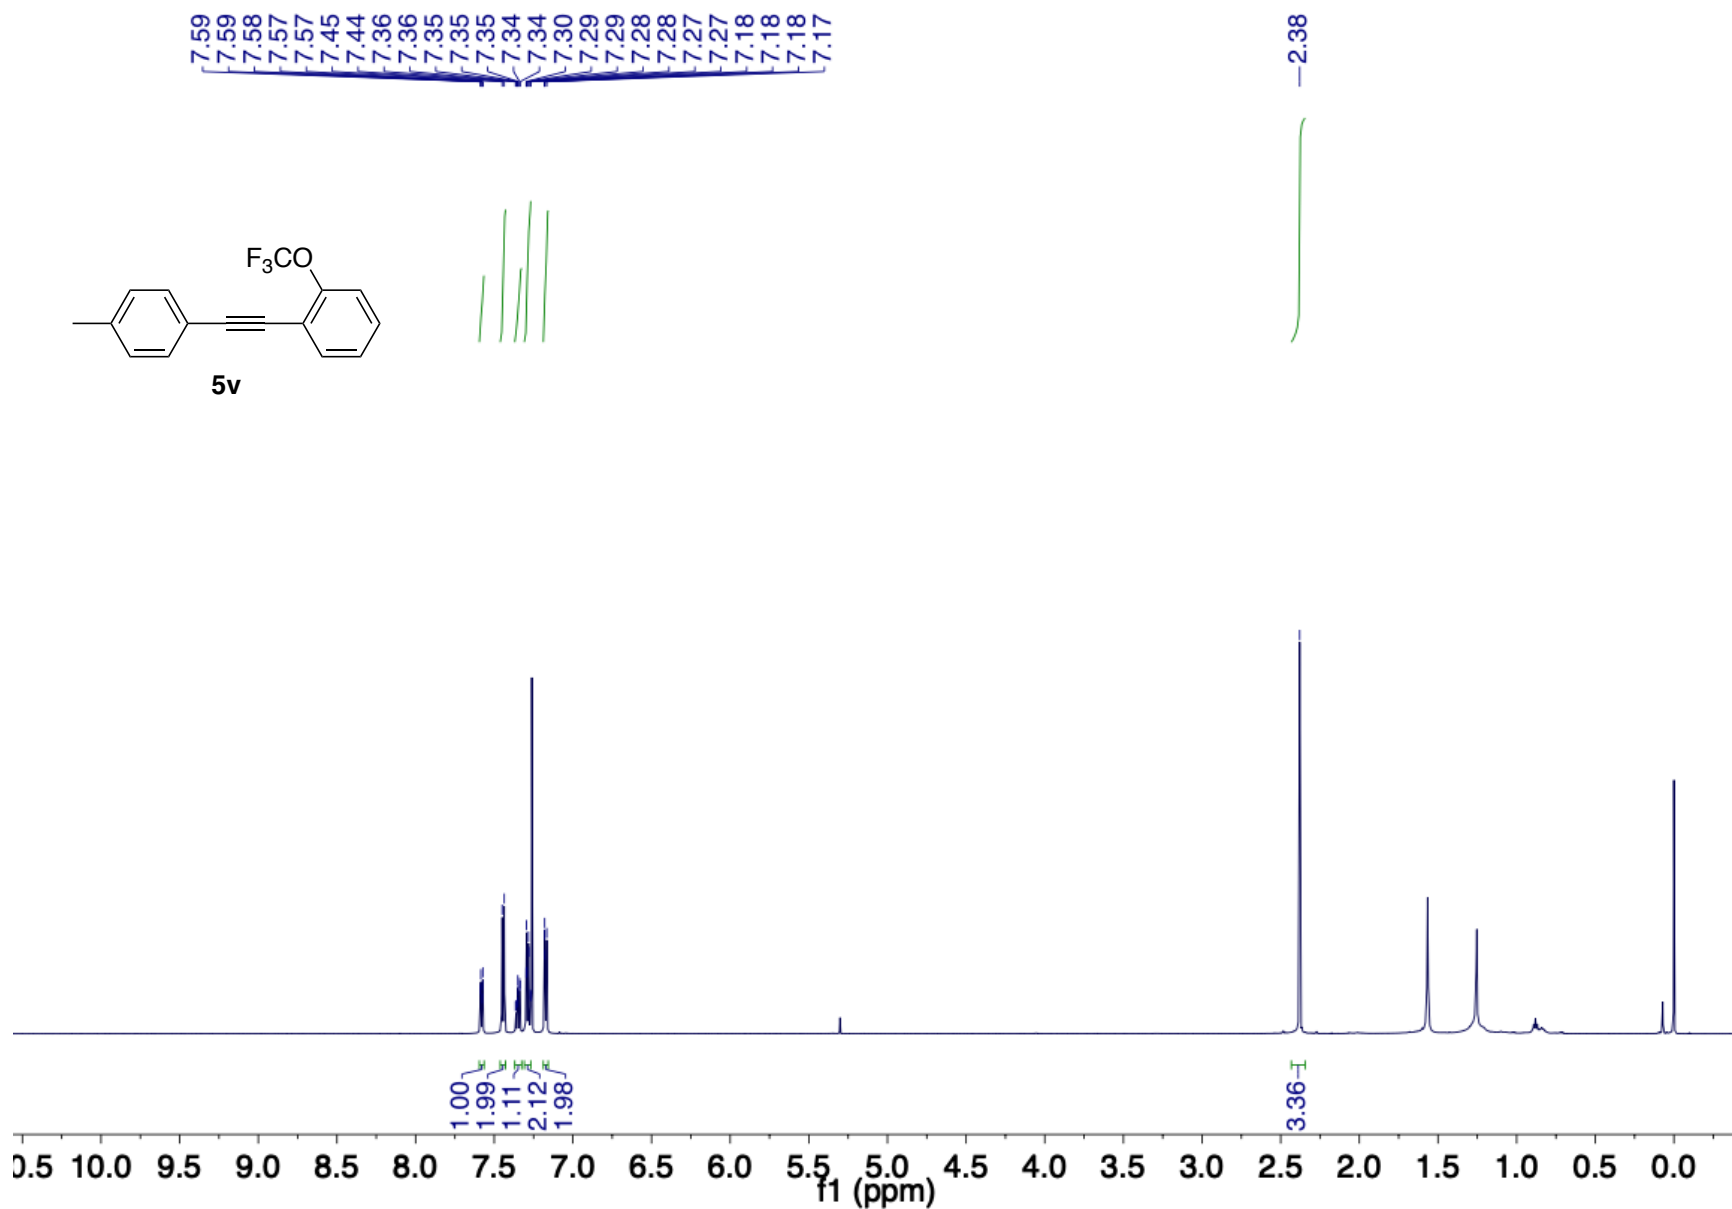

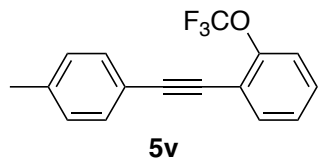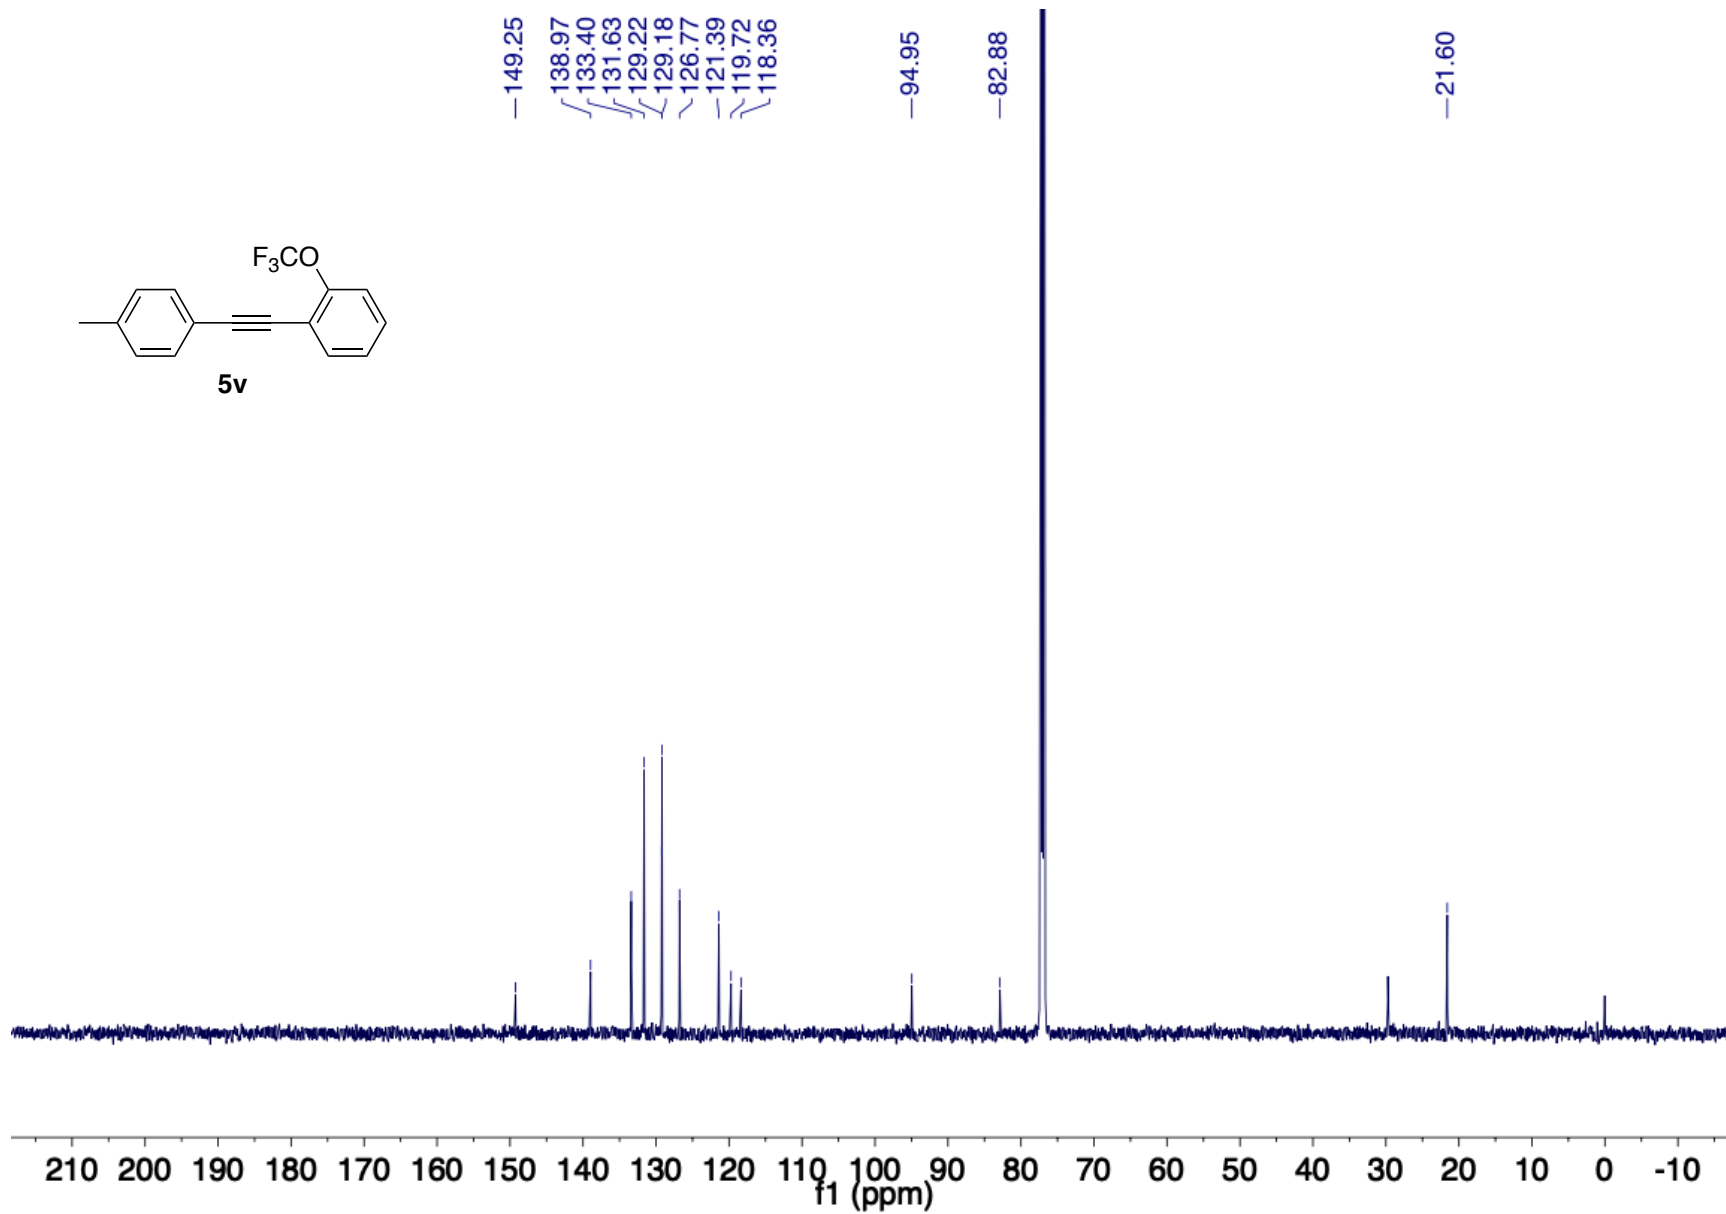

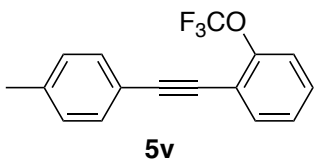

--57.49

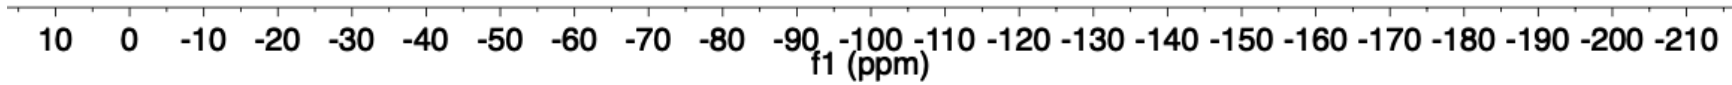

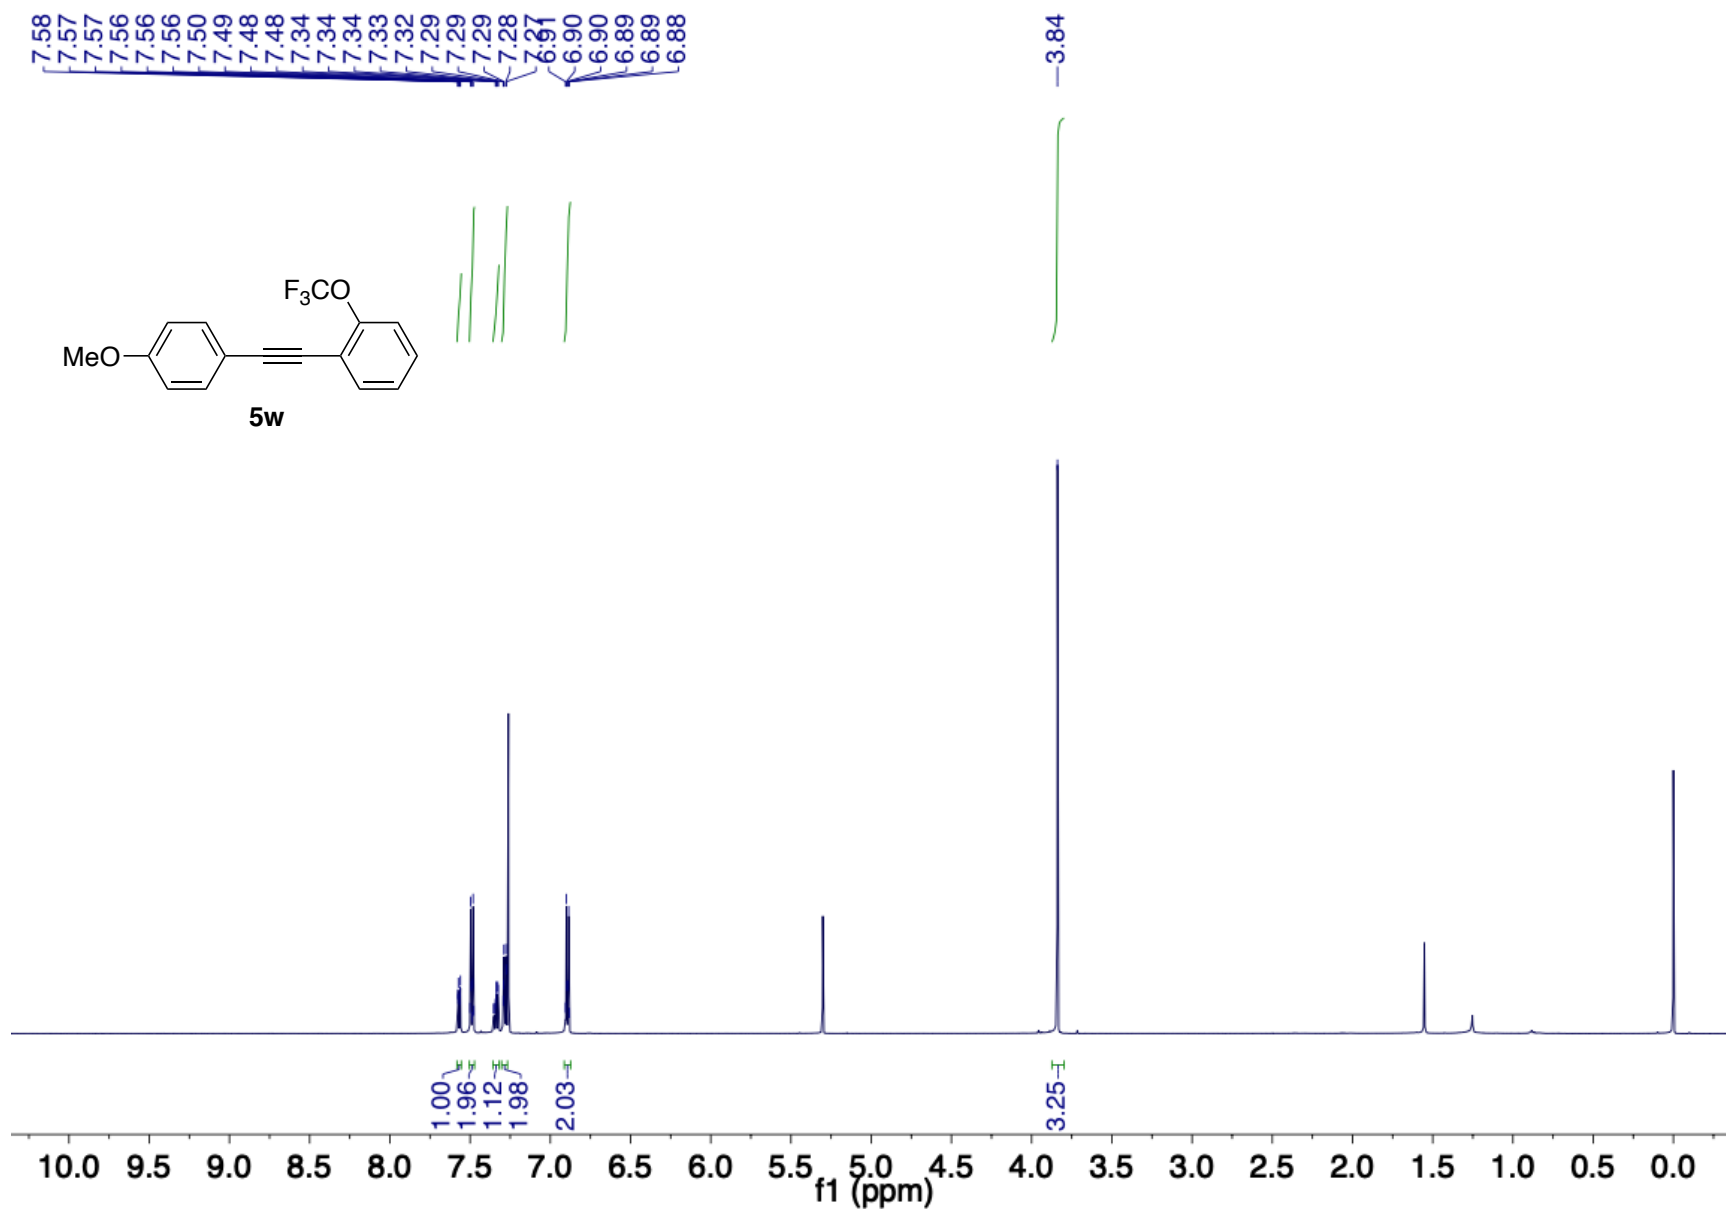

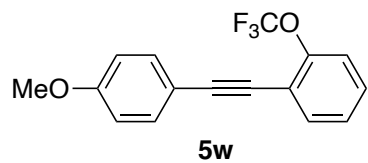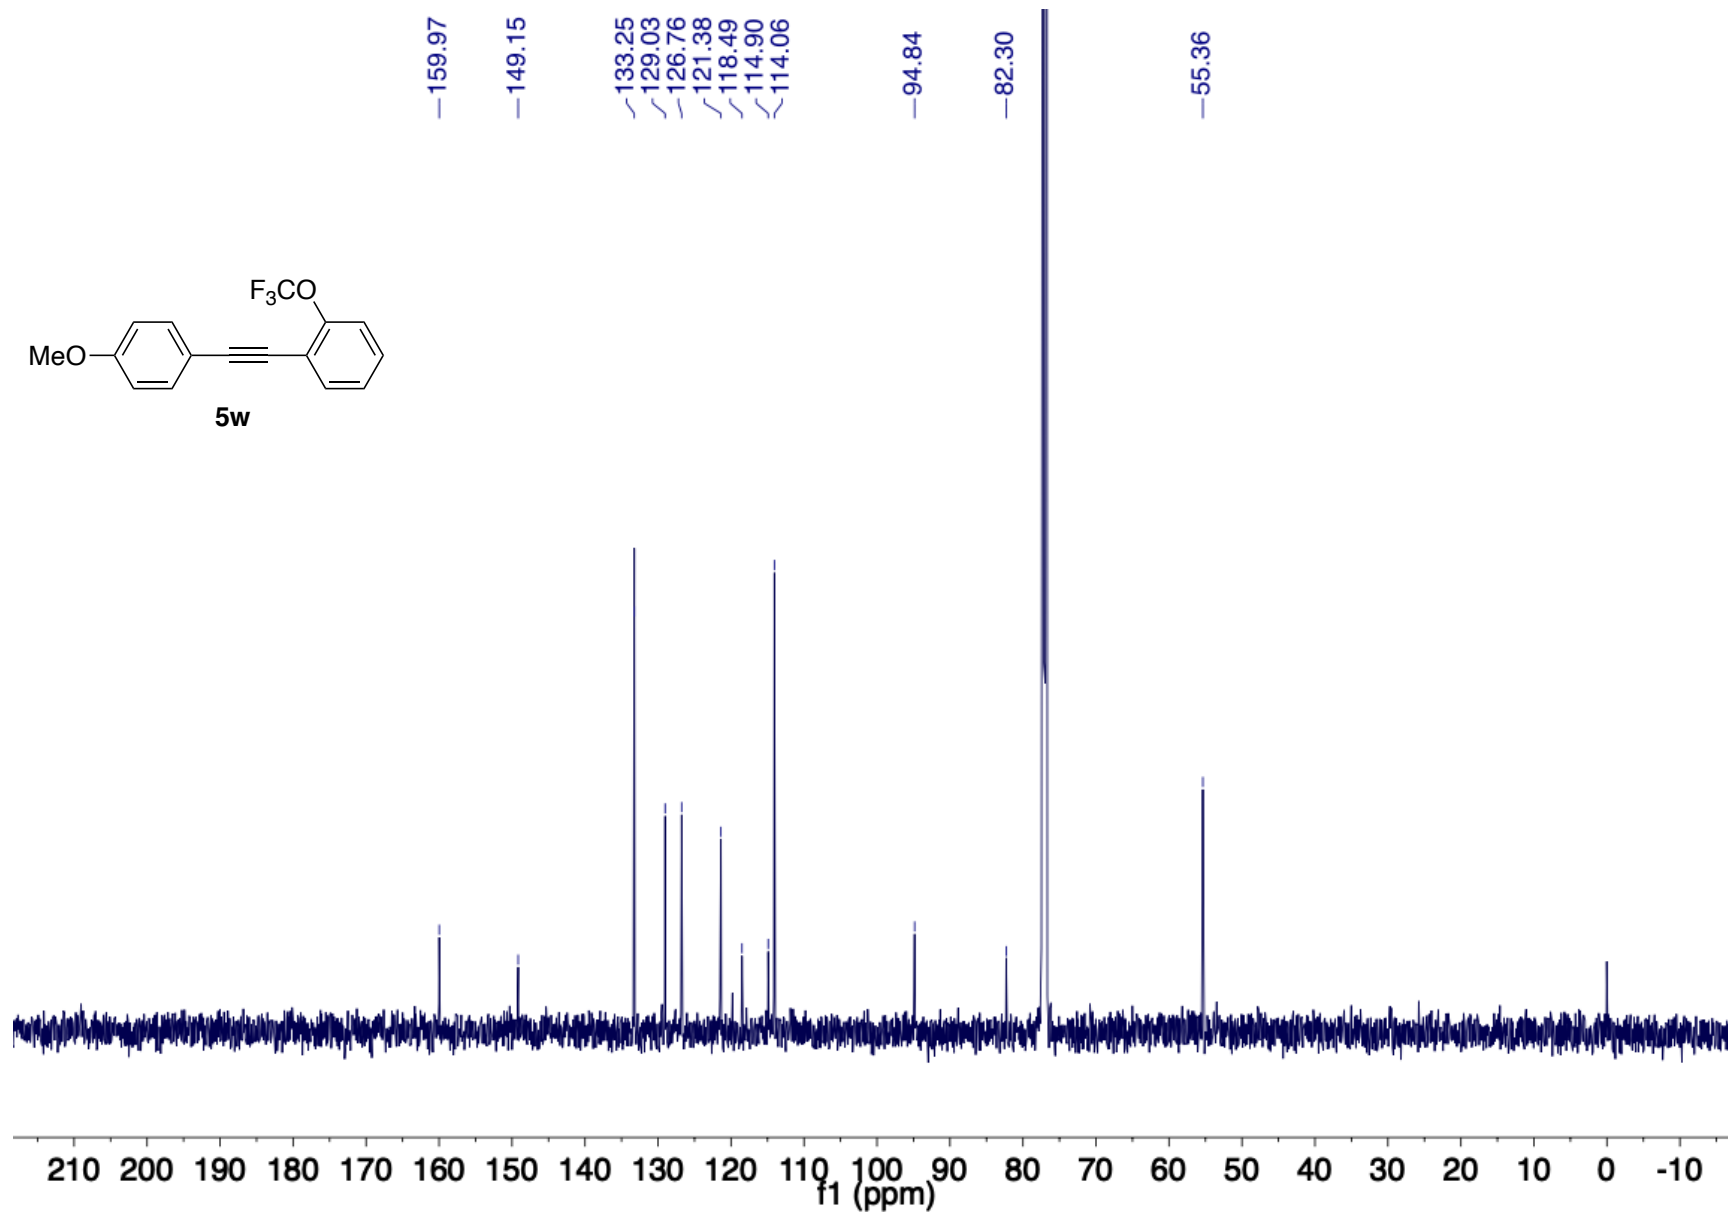



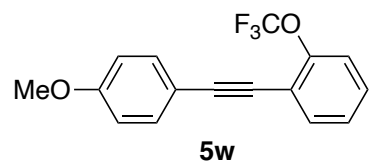

--57.48

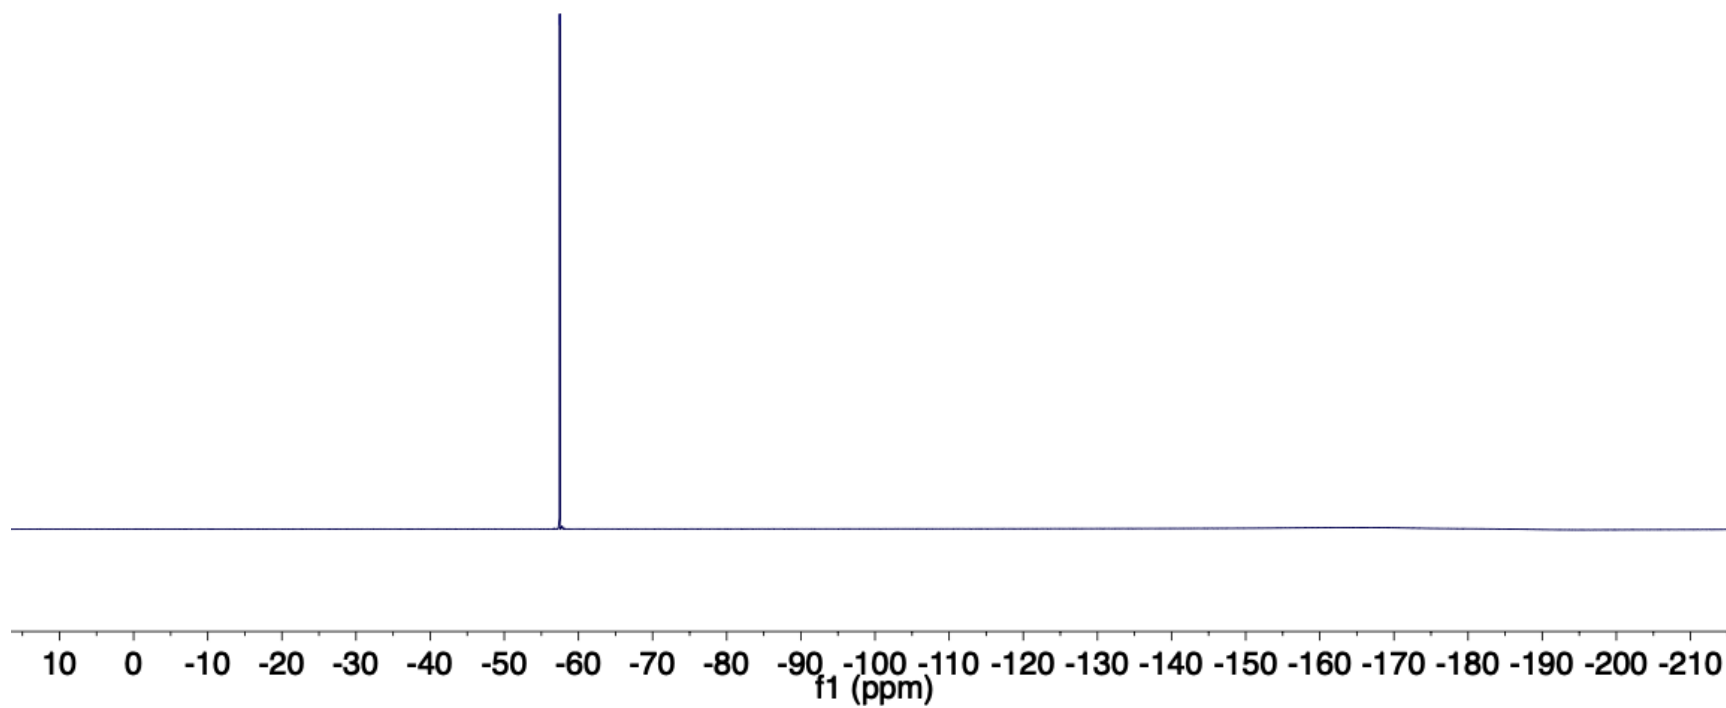

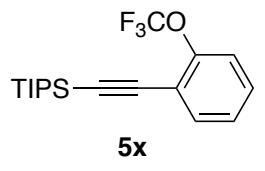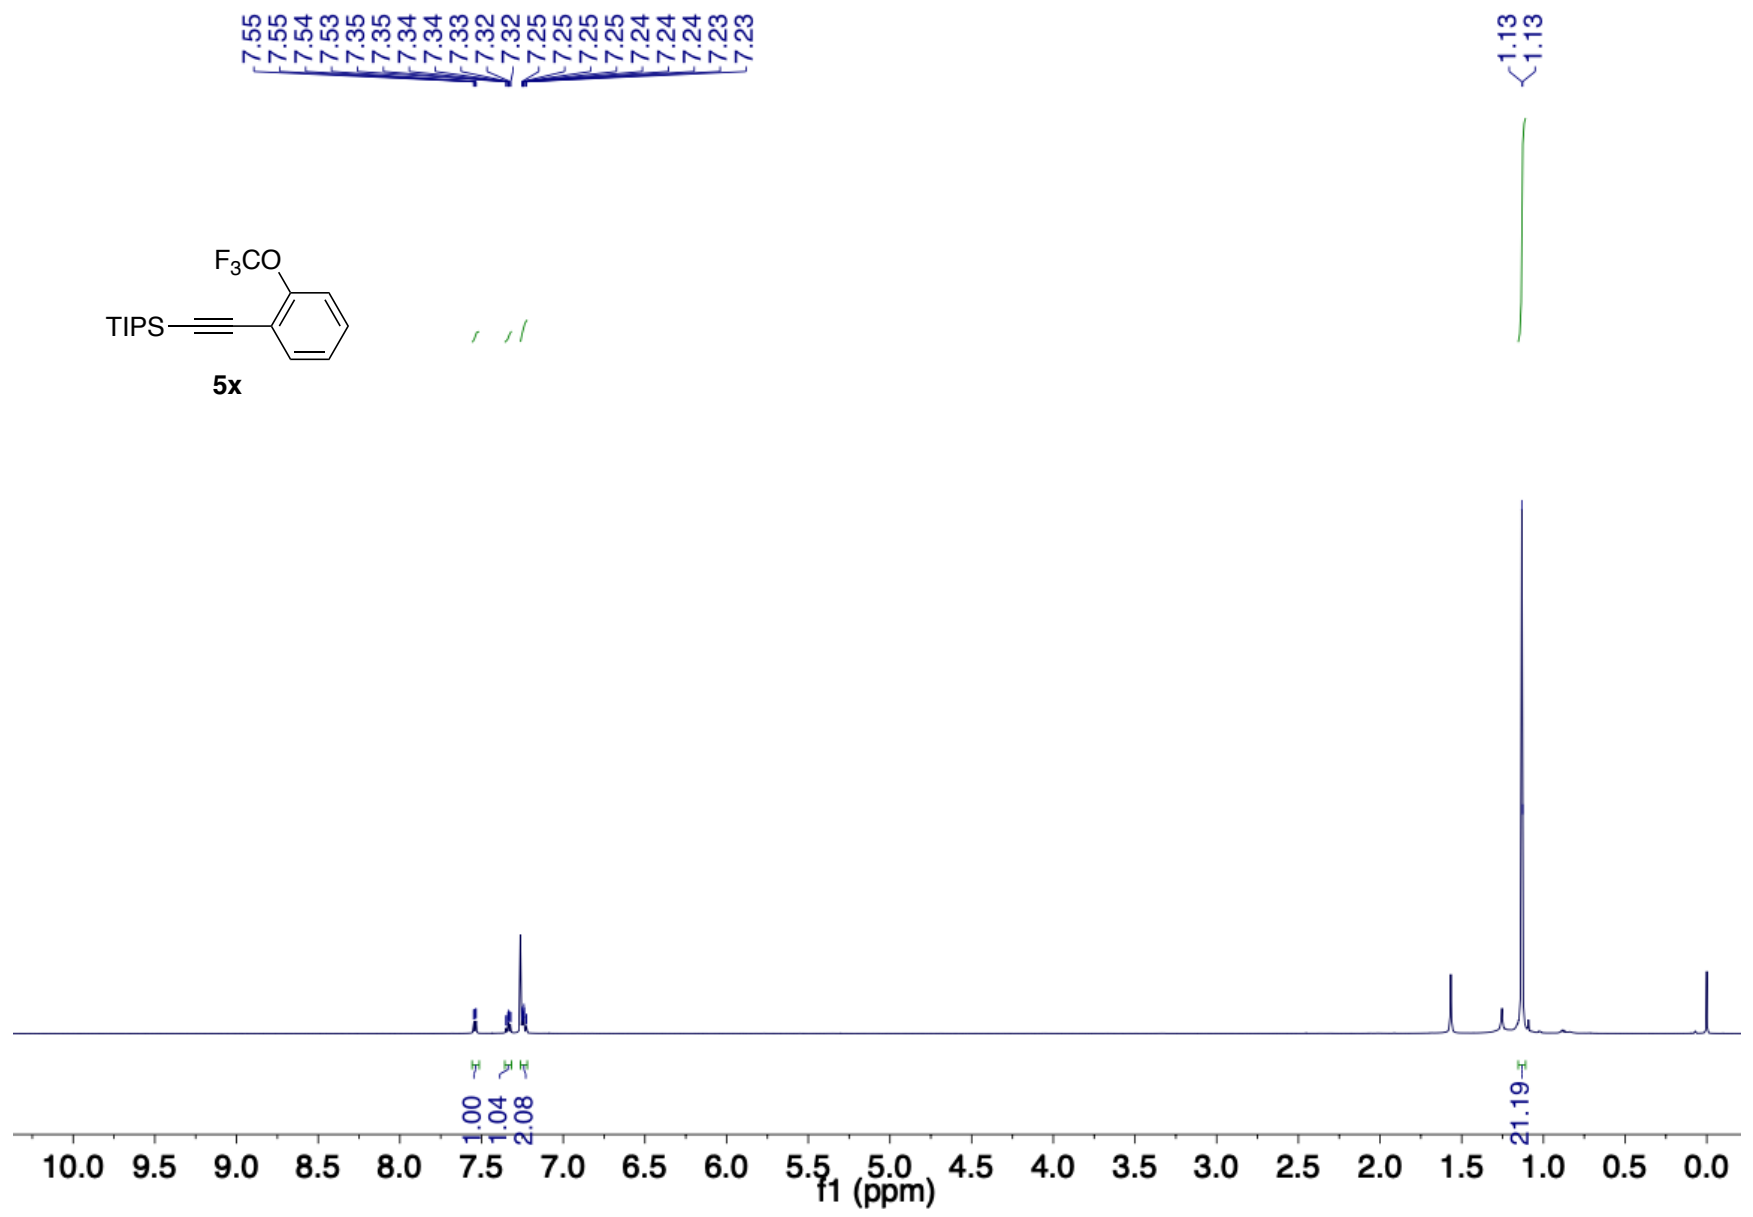

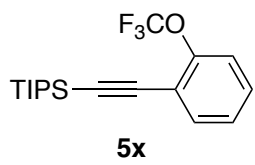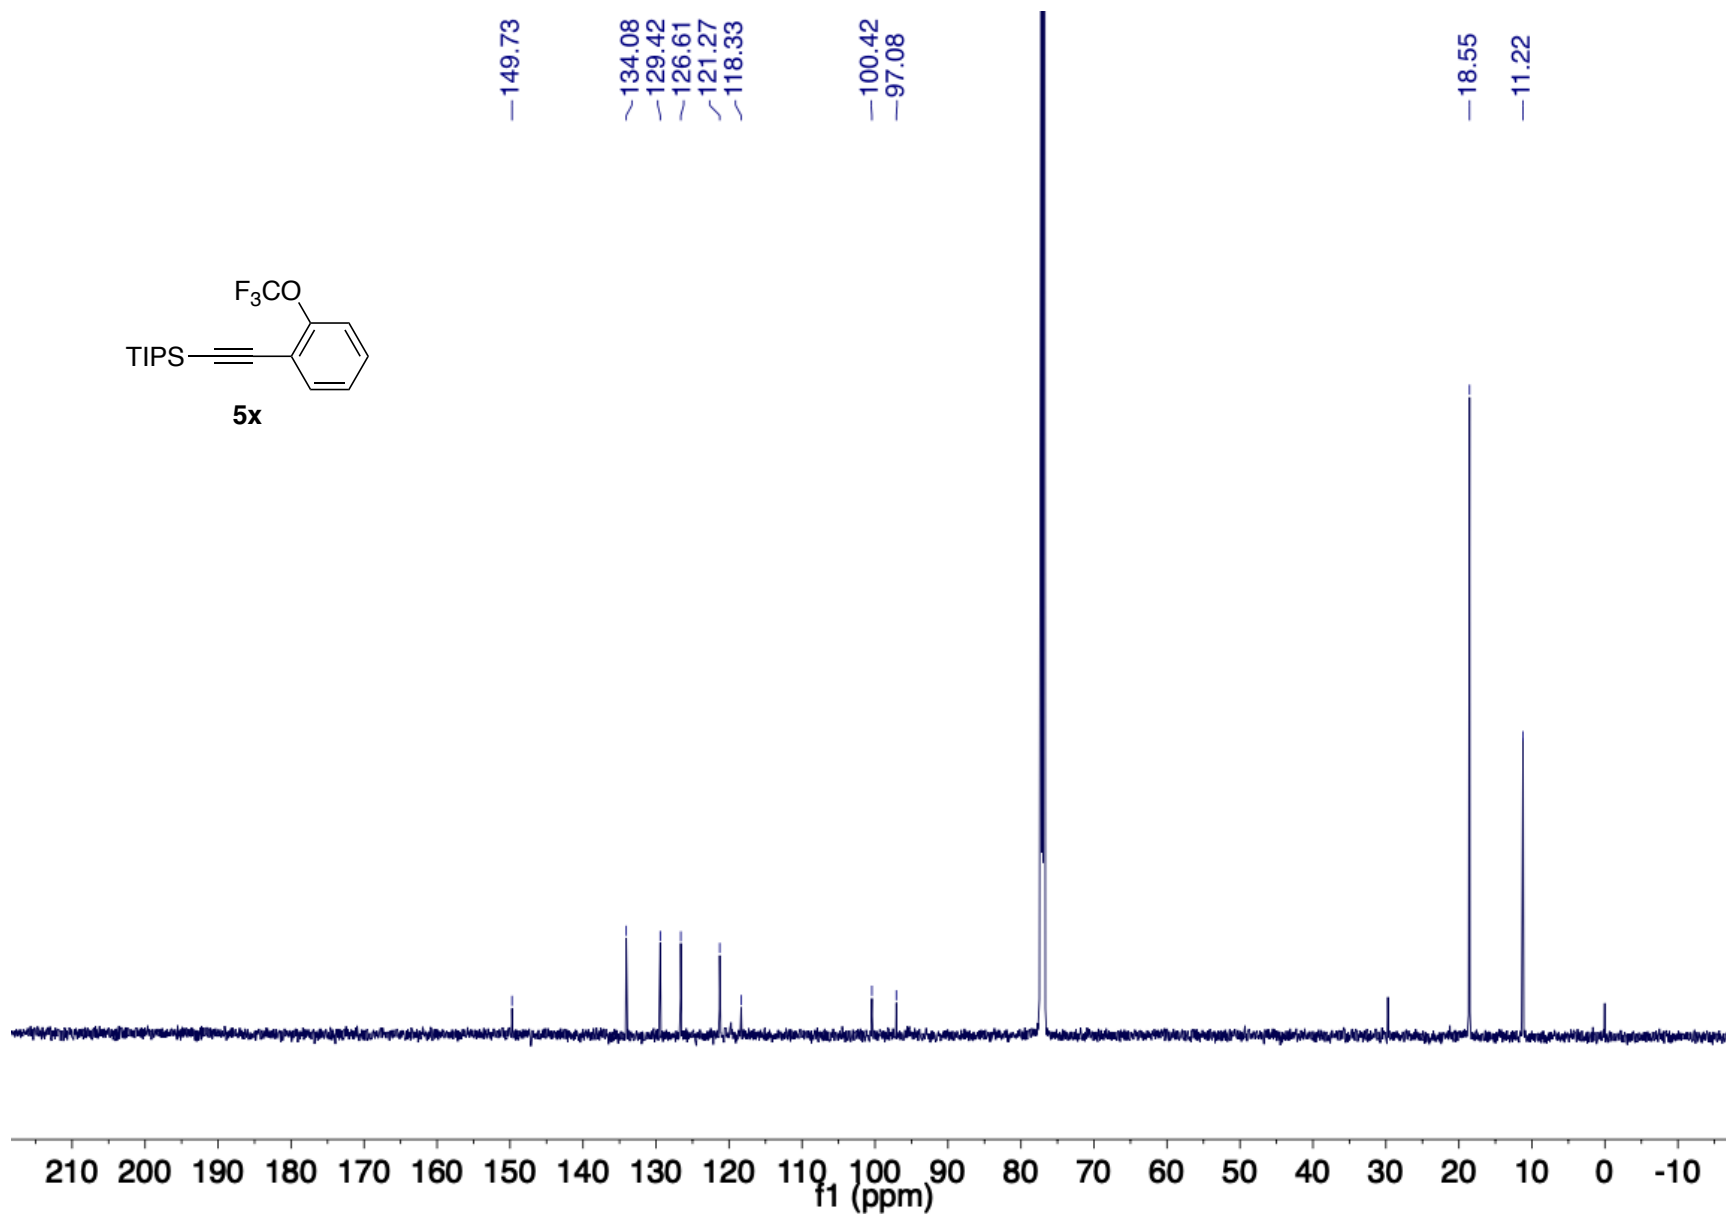

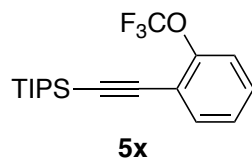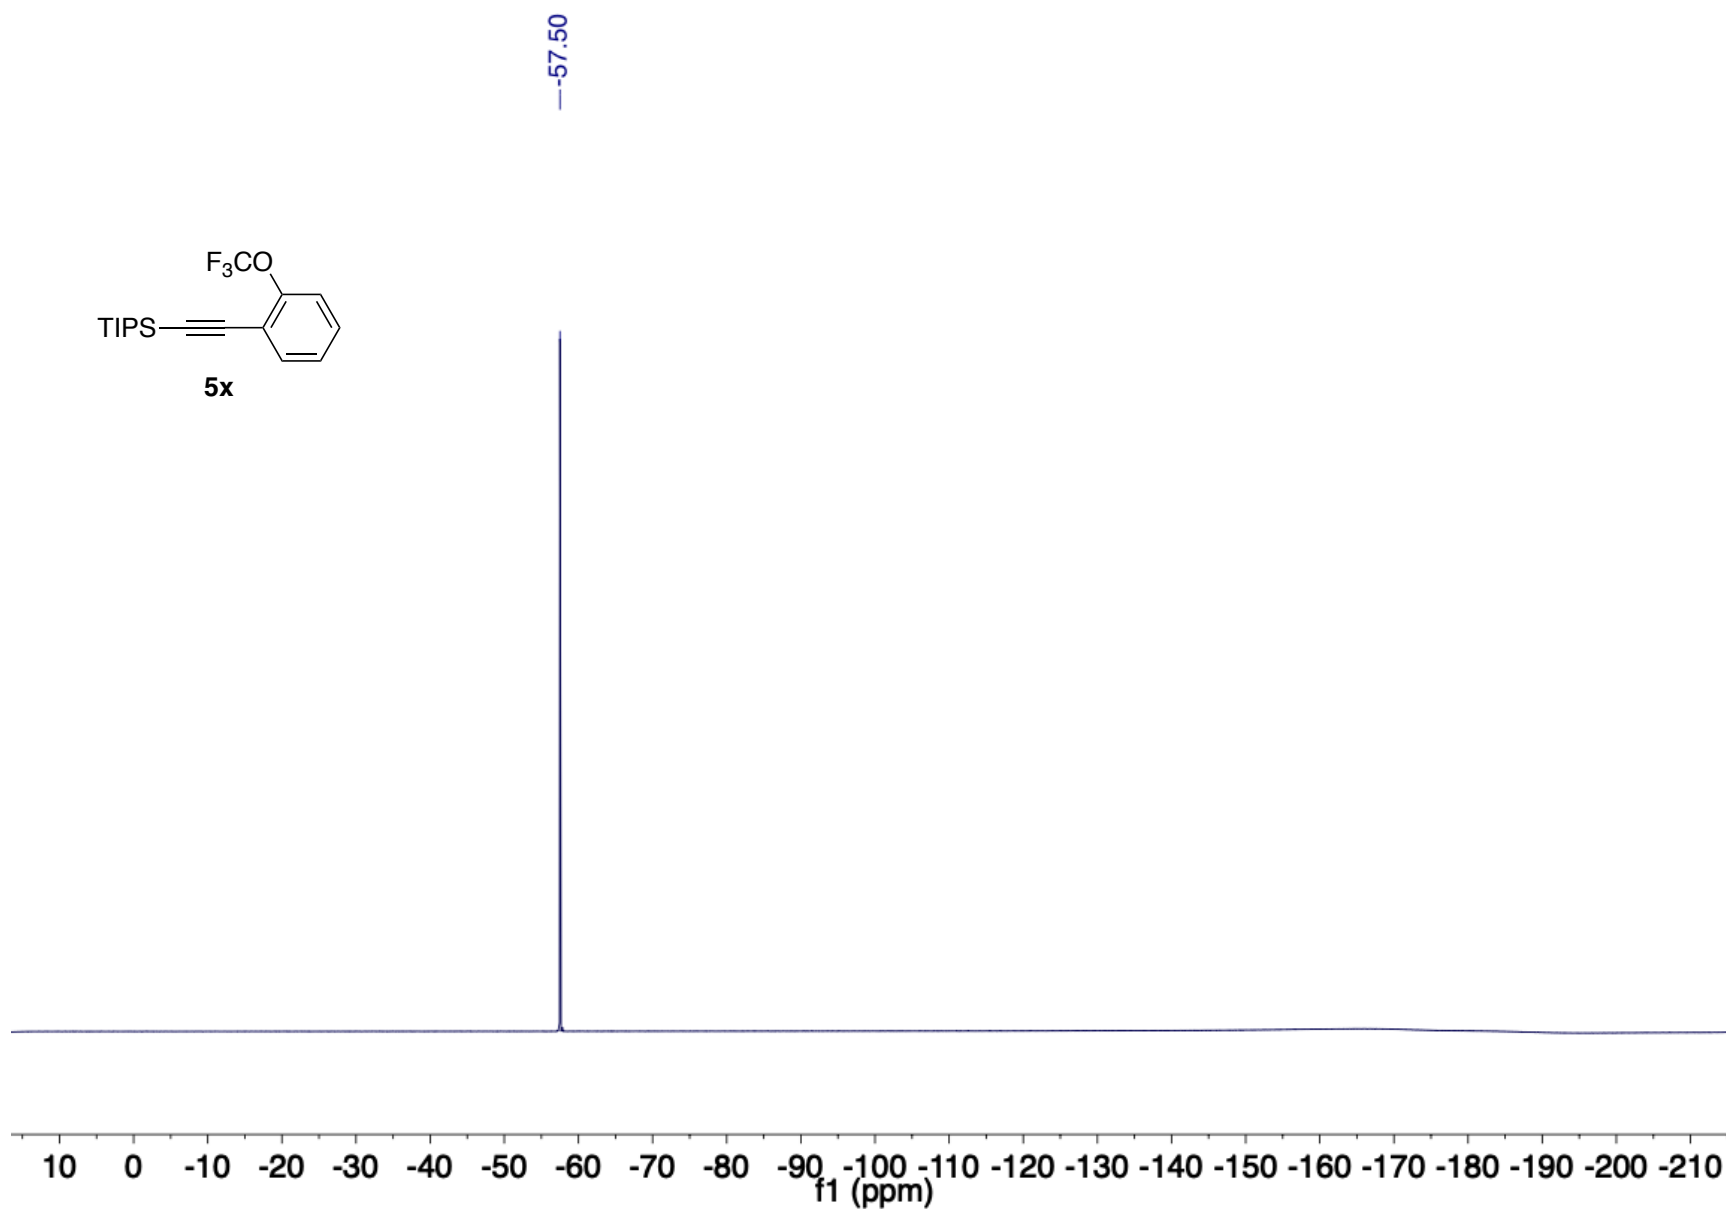

Supplement: NIHMS1906333-supplement-SI.pdf [file NIHMS1906333-supplement-SI.pdf]
